# Supplementary material
Source: publisher figshare collection journal article supplement (https://acs.figshare.com/ndownloader/files/28076102)
Supplement: Supplementary file 1 [file 28076102]

## Sheet: Table S1
The list of common O-GalNAc glycan compositions
No.	Compositions	Mass weight
1	Hex(1)HexNAc(1)Neu5Ac(1)	656.23
2	Hex(1)HexNAc(1)Neu5Ac(2)	947.32
3	Hex(1)HexNAc(1)	365.13
4	Fuc(1)Hex(3)HexNAc(3)Neu5Ac(2)	1823.64
5	HexNAc(1)Neu5Ac(1)	494.17
6	HexNAc(1)	203.08
7	Hex(1)HexNAc(2)Neu5Ac(1)	859.31
8	Fuc(1)Hex(1)HexNAc(1)	511.19
9	HexNAc(2)	406.16

## Sheet: Table S2A
Table S2A. Intact glycopeptides identified from 1.0 μL human serum by using HILIC method.
Proteins	Sequence	Modifications	RT [sec]	Precursor Mass	Precursor Charge	Precursor m/z	Peptide Mass	Mass Error [Da]	Mass Error [ppm]	PSM e-value	Rank Score	percolator:PEP	percolator:Q value	Delta Mass	Glycan compositions	Intact glycopeptides	MS Title
P00747	IPSCDSSPVSTEQLAPTAPPELTPVVQDCYHGDGQSYR	C4(Carbamidomethyl);C29(Carbamidomethyl)	4582.000	4814.16	3	1605.73	4157.89	0.0357319	7.42225	4.102e-23	235	1.73345e-06	0.00145952	656.2276	Hex(1)HexNAc(1)Neu5Ac(1)	P00747_IPSCDSSPVSTEQLAPTAPPELTPVVQDCYHGDGQSYR_Hex(1)HexNAc(1)Neu5Ac(1)	File25305 Spectrum17313 scans: 22700
P02765	TVVQPSVGAAAGPVVPPCPGR	C18(Carbamidomethyl)	4071.000	2671.31	2	1336.66	2015.06	0.0238172	8.9159	3.1154e-16	210	3.994e-05	0.00146	656.2276	Hex(1)HexNAc(1)Neu5Ac(1)	P02765_TVVQPSVGAAAGPVVPPCPGR_Hex(1)HexNAc(1)Neu5Ac(1)	File25305 Spectrum14486 scans: 19730
P02671	SETESPRNPSSAGSWNSGSSGPGSTGNR	N16(Deamidated)	2577.000	3406.47	3	1136.5	2750.18	0.0642498	18.8611	4.8287e-18	208	1.658e-05	0.00146	656.2276	Hex(1)HexNAc(1)Neu5Ac(1)	P02671_SETESPRNPSSAGSWNSGSSGPGSTGNR_Hex(1)HexNAc(1)Neu5Ac(1)	File25305 Spectrum6100 scans: 10920
Q14624	IEETTMTTQTPAPIQAPSAILPLPGQSVER	M6(Oxidation)	4823.000	3847.9	3	1283.64	3191.64	0.0357761	9.29756	3.4959e-19	206	1.799e-05	0.00146	656.2276	Hex(1)HexNAc(1)Neu5Ac(1)	Q14624_IEETTMTTQTPAPIQAPSAILPLPGQSVER_Hex(1)HexNAc(1)Neu5Ac(1)	File25305 Spectrum18619 scans: 24129
P02671	MADEAGSEADHEGTHSTKR		1610.000	2684.09	4	672.029	2027.86	0.00019886	0.0740883	2.3958e-15	204	6.008e-05	0.00146	656.2276	Hex(1)HexNAc(1)Neu5Ac(1)	P02671_MADEAGSEADHEGTHSTKR_Hex(1)HexNAc(1)Neu5Ac(1)	File25305 Spectrum621 scans: 5167
P02790	TPLPPTSAHGNVAEGETKPDPDVTER		2933.000	3370.55	2	1686.28	2714.31	0.0122949	3.64775	3.9407e-20	204	4.083e-05	0.00146	656.2276	Hex(1)HexNAc(1)Neu5Ac(1)	P02790_TPLPPTSAHGNVAEGETKPDPDVTER_Hex(1)HexNAc(1)Neu5Ac(1)	File25305 Spectrum8155 scans: 13083
P01876	HYTNPSQDVTVPCPVPSTPPTPSPSTPPTPSPSCCHPR	C34(Carbamidomethyl);C35(Carbamidomethyl);C13(Carbamidomethyl)	3699.000	4501.02	4	1126.26	4135.88	0.00405994	0.902004	3.9549e-22	200	2.542e-06	0.00146	365.1322	Hex(1)HexNAc(1)	P01876_HYTNPSQDVTVPCPVPSTPPTPSPSTPPTPSPSCCHPR_Hex(1)HexNAc(1)	File25305 Spectrum12432 scans: 17574
P02671	TGSETESPRNPSSAGSWNSGSSGPGSTGNR	N18(Deamidated)	2903.000	3403.44	3	1135.49	2908.25	0.0204389	6.00537	2.4073e-19	198	8.338e-06	0.00146	494.1748	HexNAc(1)Neu5Ac(1)	P02671_TGSETESPRNPSSAGSWNSGSSGPGSTGNR_HexNAc(1)Neu5Ac(1)	File25305 Spectrum7977 scans: 12896
P02790	TPLPPTSAHGNVAEGETKPDPDVTER		2740.000	3079.43	2	1540.72	2714.31	-0.0123051	-3.99589	1.105e-18	197	5.74e-06	0.00146	365.1322	Hex(1)HexNAc(1)	P02790_TPLPPTSAHGNVAEGETKPDPDVTER_Hex(1)HexNAc(1)	File25305 Spectrum7029 scans: 11900
P02790	TPLPPTSAHGNVAEGETKPDPDVTER		3117.000	3661.65	3	1221.56	2714.31	0.0147185	4.01962	3.6115e-15	190	0.0001302	0.00146	947.3230	Hex(1)HexNAc(1)Neu5Ac(2)	P02790_TPLPPTSAHGNVAEGETKPDPDVTER_Hex(1)HexNAc(1)Neu5Ac(2)	File25305 Spectrum9209 scans: 14190
P19827	TFVLSALQPSPTHSSSNTQR		4383.000	2813.31	4	704.336	2157.08	0.00464908	1.65253	6.9718e-12	185	0.0003766	0.00146	656.2276	Hex(1)HexNAc(1)Neu5Ac(1)	P19827_TFVLSALQPSPTHSSSNTQR_Hex(1)HexNAc(1)Neu5Ac(1)	File25305 Spectrum16220 scans: 21552
P02671	GGSTSYGTGSETESPRNPSSAGSWNSGSSGPGSTGNR	N25(Deamidated)	2974.000	4174.72	4	1044.69	3517.49	0.00300739	0.720381	1.9955e-14	184	0.0007806	0.00146	656.2276	Hex(1)HexNAc(1)Neu5Ac(1)	P02671_GGSTSYGTGSETESPRNPSSAGSWNSGSSGPGSTGNR_Hex(1)HexNAc(1)Neu5Ac(1)	File25305 Spectrum8395 scans: 13335
P02649	VQAAVGTSAAPVPSDNH		3031.000	2276.02	3	759.68	1619.79	0.000522241	0.229454	1.9035e-13	184	9.848e-05	0.00146	656.2276	Hex(1)HexNAc(1)Neu5Ac(1)	P02649_VQAAVGTSAAPVPSDNH_Hex(1)HexNAc(1)Neu5Ac(1)	File25305 Spectrum8725 scans: 13681
P02671	MADEAGSEADHEGTHSTK		1661.000	2527.99	4	633.004	1871.76	0.0017099	0.676386	1.0425e-11	182	0.0003866	0.00146	656.2276	Hex(1)HexNAc(1)Neu5Ac(1)	P02671_MADEAGSEADHEGTHSTK_Hex(1)HexNAc(1)Neu5Ac(1)	File25305 Spectrum914 scans: 5475
P19827	VLSALQPSPTHSSSNTQR		2953.000	2565.19	4	642.306	1908.97	0.00114149	0.444992	5.7993e-12	182	0.003936	0.00146	656.2276	Hex(1)HexNAc(1)Neu5Ac(1)	P19827_VLSALQPSPTHSSSNTQR_Hex(1)HexNAc(1)Neu5Ac(1)	File25305 Spectrum8270 scans: 13203
P02748	AQYTTSYDPELTESSGSASHIDCR	C23(Carbamidomethyl)	4057.000	3533.42	3	1178.81	2674.15	-0.030333	-8.58459	1.202e-13	180	0.0006751	0.00146	859.3070	Hex(1)HexNAc(2)Neu5Ac(1)	P02748_AQYTTSYDPELTESSGSASHIDCR_Hex(1)HexNAc(2)Neu5Ac(1)	File25305 Spectrum14409 scans: 19650
P0C0L5	GVAHNNLMAMAQETGDNLYWGSVTGSQSNAVSPTPAPR	Q12(Deamidated);N17(Deamidated)	4774.000	4878.15	5	976.638	3929.79	0.030884	6.33108	5.193e-19	179	2.261e-05	0.00146	947.3230	Hex(1)HexNAc(1)Neu5Ac(2)	P0C0L5_GVAHNNLMAMAQETGDNLYWGSVTGSQSNAVSPTPAPR_Hex(1)HexNAc(1)Neu5Ac(2)	File25305 Spectrum18354 scans: 23831
P05155	NPNATSSSSQDPESLQDRGEGK	N3(Deamidated)	2591.000	3251.34	3	1084.79	2304.01	0.00928033	2.85431	2.0848e-14	178	0.0008024	0.00146	947.3230	Hex(1)HexNAc(1)Neu5Ac(2)	P05155_NPNATSSSSQDPESLQDRGEGK_Hex(1)HexNAc(1)Neu5Ac(2)	File25305 Spectrum6174 scans: 10998
P0C0L5	APADLRGVAHNNLMAMAQETGDNLYWGSVTGSQSNAVSPTPAPR	N11(Deamidated);M14(Oxidation);Q18(Deamidated)	4314.000	4935.2	3	1646.07	4569.13	-0.0682872	-13.8368	5.5213e-19	175	3.831e-05	0.00146	365.1322	Hex(1)HexNAc(1)	P0C0L5_APADLRGVAHNNLMAMAQETGDNLYWGSVTGSQSNAVSPTPAPR_Hex(1)HexNAc(1)	File25305 Spectrum15838 scans: 21151
P02765	TVVQPSVGAAAGPVVPPCPGR	C18(Carbamidomethyl)	3882.000	2380.2	3	794.408	2015.06	0.0068407	2.874	3.2137e-13	174	0.0003111	0.00146	365.1322	Hex(1)HexNAc(1)	P02765_TVVQPSVGAAAGPVVPPCPGR_Hex(1)HexNAc(1)	File25305 Spectrum13444 scans: 18636
P01876	HYTNPSQDVTVPCPVPSTPPTPSPSTPPTPSPSCCHPR	C34(Carbamidomethyl);C35(Carbamidomethyl);C13(Carbamidomethyl)	3800.000	4338.97	4	1085.75	4135.88	0.00685994	1.58101	7.3093e-18	174	7.682e-06	0.00146	203.0794	HexNAc(1)	P01876_HYTNPSQDVTVPCPVPSTPPTPSPSTPPTPSPSCCHPR_HexNAc(1)	File25305 Spectrum12991 scans: 18161
Q9NZP8	VQNHCQEPYYQAAAAGALTCATPGTWK	C5(Carbamidomethyl);C20(Carbamidomethyl)	4386.000	3940.71	3	1314.58	2992.36	0.0281913	7.15387	5.7304e-11	173	0.001668	0.00146	947.3230	Hex(1)HexNAc(1)Neu5Ac(2)	Q9NZP8_VQNHCQEPYYQAAAAGALTCATPGTWK_Hex(1)HexNAc(1)Neu5Ac(2)	File25305 Spectrum16236 scans: 21569
Q9UGM5	FVSVTCDFFESQAPATGSENSAVNQKPTNLPK	C6(Carbamidomethyl)	4621.000	4126.91	3	1376.64	3469.65	0.0334028	8.09391	6.28e-17	173	3.721e-05	0.00146	656.2276	Hex(1)HexNAc(1)Neu5Ac(1)	Q9UGM5_FVSVTCDFFESQAPATGSENSAVNQKPTNLPK_Hex(1)HexNAc(1)Neu5Ac(1)	File25305 Spectrum17528 scans: 22926
P02790	ATPLPPTSAHGNVAEGETKPDPDVTER		2955.000	3645.64	3	1216.22	2785.35	-0.024164	-6.62819	6.1299e-14	172	0.0003922	0.00146	859.3070	Hex(1)HexNAc(2)Neu5Ac(1)	P02790_ATPLPPTSAHGNVAEGETKPDPDVTER_Hex(1)HexNAc(2)Neu5Ac(1)	File25305 Spectrum8283 scans: 13217
Q9NZP8	VQNHCQEPYYQAAAAGALTCATPGTWK	C5(Carbamidomethyl);C20(Carbamidomethyl)	4337.000	3649.6	3	1217.54	2992.36	0.00599134	1.64165	1.0965e-10	171	0.007118	0.00146	656.2276	Hex(1)HexNAc(1)Neu5Ac(1)	Q9NZP8_VQNHCQEPYYQAAAAGALTCATPGTWK_Hex(1)HexNAc(1)Neu5Ac(1)	File25305 Spectrum15967 scans: 21287
P0C0L5	GVAHNNLMAMAQETGDNLYWGSVTGSQSNAVSPTPAPR	Q12(Deamidated);N17(Deamidated)	4719.000	4587.05	4	1147.77	3929.79	0.0211605	4.61309	6.7666e-21	171	5.671e-06	0.00146	656.2276	Hex(1)HexNAc(1)Neu5Ac(1)	P0C0L5_GVAHNNLMAMAQETGDNLYWGSVTGSQSNAVSPTPAPR_Hex(1)HexNAc(1)Neu5Ac(1)	File25305 Spectrum18062 scans: 23497
Q16610	GQGEQGSTGGTNISSTSEPKEE		2447.000	3126.28	3	1043.1	2178.95	0.0026922	0.861154	1.7816e-12	170	0.0004871	0.00146	947.3230	Hex(1)HexNAc(1)Neu5Ac(2)	Q16610_GQGEQGSTGGTNISSTSEPKEE_Hex(1)HexNAc(1)Neu5Ac(2)	File25305 Spectrum5353 scans: 10136
P04004	QCDELCSYYQSCCTDYTAECKPQVTR	C2(Carbamidomethyl);C6(Carbamidomethyl);C12(Carbamidomethyl);C13(Carbamidomethyl);C20(Carbamidomethyl)	4047.000	3525.34	3	1176.12	3321.31	-0.0531164	-15.067	3.5616e-18	170	4.355e-05	0.00146	203.0794	HexNAc(1)	P04004_QCDELCSYYQSCCTDYTAECKPQVTR_HexNAc(1)	File25305 Spectrum14355 scans: 19593
P02765	TVVQPSVGAAAGPVVPPCPGR	C18(Carbamidomethyl)	4228.000	2962.41	3	988.478	2015.06	0.0257407	8.6891	9.0479e-11	168	0.0007412	0.00146	947.3230	Hex(1)HexNAc(1)Neu5Ac(2)	P02765_TVVQPSVGAAAGPVVPPCPGR_Hex(1)HexNAc(1)Neu5Ac(2)	File25305 Spectrum15358 scans: 20646
Q96PD5	DGSPDVTTADIGANTPDATK		3393.000	2892.23	2	1447.12	1944.89	0.0180028	6.22453	1.2208e-12	168	0.000285	0.00146	947.3230	Hex(1)HexNAc(1)Neu5Ac(2)	Q96PD5_DGSPDVTTADIGANTPDATK_Hex(1)HexNAc(1)Neu5Ac(2)	File25305 Spectrum10737 scans: 15794
P02790	IATPLPPTSAHGNVAEGETKPDPDVTER		2895.000	3409.56	3	1137.53	2898.44	-0.0629593	-18.4655	3.6243e-14	168	0.000864	0.00146	511.1901	Fuc(1)Hex(1)HexNAc(1)	P02790_IATPLPPTSAHGNVAEGETKPDPDVTER_Fuc(1)Hex(1)HexNAc(1)	File25305 Spectrum7933 scans: 12850
P05155	NATSSSSQDPESLQDRGEGK	N1(Deamidated)	2412.000	2749.14	3	917.388	2092.91	0.000671657	0.244315	1.9988e-10	166	0.00581	0.00146	656.2276	Hex(1)HexNAc(1)Neu5Ac(1)	P05155_NATSSSSQDPESLQDRGEGK_Hex(1)HexNAc(1)Neu5Ac(1)	File25305 Spectrum5154 scans: 9927
P02671	HRHPDEAAFFDTASTGK		3078.000	2833.2	4	709.307	1885.87	0.00677017	2.38958	9.0074e-13	165	0.0003886	0.00146	947.3230	Hex(1)HexNAc(1)Neu5Ac(2)	P02671_HRHPDEAAFFDTASTGK_Hex(1)HexNAc(1)Neu5Ac(2)	File25305 Spectrum8988 scans: 13957
P22891	PCISQPCLHNGSCQDSIWGYTCTCSPGYEGSNCELAK	C33(Carbamidomethyl);C2(Carbamidomethyl);Q5(Deamidated);C7(Carbamidomethyl);N10(Deamidated);C13(Carbamidomethyl);C22(Carbamidomethyl);C24(Carbamidomethyl)	4356.000	4806.91	3	1603.31	4294.71	0.00861711	1.79265	1.5926e-17	164	1.616e-05	0.00146	511.1901	Fuc(1)Hex(1)HexNAc(1)	P22891_PCISQPCLHNGSCQDSIWGYTCTCSPGYEGSNCELAK_Fuc(1)Hex(1)HexNAc(1)	File25305 Spectrum16072 scans: 21397
P02671	TSYGTGSETESPRNPSSAGSWNSGSSGPGSTGNR		2934.000	4175.75	3	1392.92	3315.43	0.0148553	3.55752	7.3495e-17	164	2.703e-05	0.00146	859.3070	Hex(1)HexNAc(2)Neu5Ac(1)	P02671_TSYGTGSETESPRNPSSAGSWNSGSSGPGSTGNR_Hex(1)HexNAc(2)Neu5Ac(1)	File25305 Spectrum8160 scans: 13088
P05155	NPNATSSSSQDPESLQDRGEGK	N3(Deamidated)	2229.000	2669.15	2	1335.58	2304.01	0.0058568	2.19426	1.2215e-12	163	0.0001907	0.00146	365.1322	Hex(1)HexNAc(1)	P05155_NPNATSSSSQDPESLQDRGEGK_Hex(1)HexNAc(1)	File25305 Spectrum4115 scans: 8836
P0C0L4	LGVAHNNLMAMAQETGDNLYWGSVTGSQSNAVSPTPAPR	N6(Deamidated);M9(Oxidation);M11(Oxidation)	4669.000	4568.07	3	1523.7	4073.88	0.00962791	2.10765	3.76e-16	163	0.0001519	0.00146	494.1748	HexNAc(1)Neu5Ac(1)	P0C0L4_LGVAHNNLMAMAQETGDNLYWGSVTGSQSNAVSPTPAPR_HexNAc(1)Neu5Ac(1)	File25305 Spectrum17796 scans: 23207
P05155	SSNPNATSSSSQDPESLQDRGEGK	N5(Deamidated)	2431.000	3134.31	3	1045.78	2478.07	0.0100235	3.19799	2.2079e-11	162	0.0005657	0.00146	656.2276	Hex(1)HexNAc(1)Neu5Ac(1)	P05155_SSNPNATSSSSQDPESLQDRGEGK_Hex(1)HexNAc(1)Neu5Ac(1)	File25305 Spectrum5262 scans: 10040
P01876	HYTNPSQDVTVPCPVPSTPPTPSPSTPPTPSPSCCHPR	C34(Carbamidomethyl);C35(Carbamidomethyl);C13(Carbamidomethyl)	3743.000	4542.06	4	1136.52	4135.88	0.0155599	3.42575	4.03e-14	162	0.0001628	0.00146	406.1587	HexNAc(2)	P01876_HYTNPSQDVTVPCPVPSTPPTPSPSTPPTPSPSCCHPR_HexNAc(2)	File25305 Spectrum12673 scans: 17827
P0C0L5	APADLRGVAHNNLMAMAQETGDNLYWGSVTGSQSNAVSPTPAPR	N11(Deamidated);M14(Oxidation);M16(Oxidation)	3646.000	4990.21	5	999.05	4584.14	-0.0843706	-16.9072	4.3535e-18	162	7.151e-05	0.00146	406.1587	HexNAc(2)	P0C0L5_APADLRGVAHNNLMAMAQETGDNLYWGSVTGSQSNAVSPTPAPR_HexNAc(2)	File25305 Spectrum12139 scans: 17266
P02787	QLCPGCGCSTLNQYFGYSGAFK	Q1(Deamidated);C3(Carbamidomethyl);C6(Carbamidomethyl);C8(Carbamidomethyl)	5145.000	4339.78	3	1447.6	2515.06	0.0708506	16.3259	2.3929e-14	161	0.0002741	0.00146	1823.6453	Fuc(1)Hex(3)HexNAc(3)Neu5Ac(2)	P02787_QLCPGCGCSTLNQYFGYSGAFK_Fuc(1)Hex(3)HexNAc(3)Neu5Ac(2)	File25305 Spectrum20339 scans: 26021
P05155	NPNATSSSSQDPESLQDRGEGK	N3(Deamidated)	2389.000	2960.25	3	987.756	2304.01	0.00988033	3.33767	6.7184e-11	159	0.0003857	0.00146	656.2276	Hex(1)HexNAc(1)Neu5Ac(1)	P05155_NPNATSSSSQDPESLQDRGEGK_Hex(1)HexNAc(1)Neu5Ac(1)	File25305 Spectrum5019 scans: 9785
P19827	VLSALQPSPTHSSSNTQR		2641.000	2274.1	3	759.041	1908.97	0.00361796	1.59094	6.1617e-11	159	0.0004827	0.00146	365.1322	Hex(1)HexNAc(1)	P19827_VLSALQPSPTHSSSNTQR_Hex(1)HexNAc(1)	File25305 Spectrum6454 scans: 11292
P0C0L4	APVDLLGVAHNNLMAMAQETGDNLYWGSVTGSQSNAVSPTPAPR	M14(Oxidation);M16(Oxidation);N23(Deamidated)	4308.000	4934.2	4	1234.56	4569.15	-0.0897472	-18.1888	1.6831e-17	159	0.0001846	0.00146	365.1322	Hex(1)HexNAc(1)	P0C0L4_APVDLLGVAHNNLMAMAQETGDNLYWGSVTGSQSNAVSPTPAPR_Hex(1)HexNAc(1)	File25305 Spectrum15803 scans: 21115
P49747	PDQADVDHDFVGDACDSDQDQDGDGHQDSR	C15(Carbamidomethyl)	3050.000	3518.34	3	1173.79	3315.25	0.0130579	3.71138	5.0351e-15	158	3.184e-05	0.00146	203.0794	HexNAc(1)	P49747_PDQADVDHDFVGDACDSDQDQDGDGHQDSR_HexNAc(1)	File25305 Spectrum8831 scans: 13793
P05155	ASSNPNATSSSSQDPESLQDRGEGK	N6(Deamidated)	2434.000	3205.34	3	1069.45	2549.11	-0.00329031	-1.02651	1.3038e-11	158	0.0008593	0.00146	656.2276	Hex(1)HexNAc(1)Neu5Ac(1)	P05155_ASSNPNATSSSSQDPESLQDRGEGK_Hex(1)HexNAc(1)Neu5Ac(1)	File25305 Spectrum5276 scans: 10055
P02790	LPPTSAHGNVAEGETKPDPDVTER		2812.000	3172.45	3	1058.49	2516.21	0.00686081	2.16262	5.4537e-13	157	0.0001498	0.00146	656.2276	Hex(1)HexNAc(1)Neu5Ac(1)	P02790_LPPTSAHGNVAEGETKPDPDVTER_Hex(1)HexNAc(1)Neu5Ac(1)	File25305 Spectrum7453 scans: 12346
Q16610	GQGEQGSTGGTNISSTSEPKEE		2285.000	2835.18	3	946.068	2178.95	0.0023922	0.843757	4.6106e-12	155	0.0005256	0.00146	656.2276	Hex(1)HexNAc(1)Neu5Ac(1)	Q16610_GQGEQGSTGGTNISSTSEPKEE_Hex(1)HexNAc(1)Neu5Ac(1)	File25305 Spectrum4425 scans: 9161
P02671	GNEITRGGSTSYGTGSETESPRNPSSAGSWNSGSSGPGSTGNR	N2(Deamidated);N23(Deamidated)	2516.000	4554.98	4	1139.75	4188.81	0.032154	7.05909	3.2667e-11	155	0.0009477	0.00146	365.1322	Hex(1)HexNAc(1)	P02671_GNEITRGGSTSYGTGSETESPRNPSSAGSWNSGSSGPGSTGNR_Hex(1)HexNAc(1)	File25305 Spectrum5744 scans: 10546
P03952	LCNTGDNSVCTTK	C2(Carbamidomethyl);C10(Carbamidomethyl)	2208.000	2124.86	2	1063.44	1468.63	0.00301937	1.42097	1.3755e-09	154	0.00457	0.00146	656.2276	Hex(1)HexNAc(1)Neu5Ac(1)	P03952_LCNTGDNSVCTTK_Hex(1)HexNAc(1)Neu5Ac(1)	File25305 Spectrum3994 scans: 8709
P19827	VLSALQPSPTHSSSNTQR		3224.000	2856.29	3	953.105	1908.97	0.00331796	1.16163	1.4903e-11	154	0.002586	0.00146	947.3230	Hex(1)HexNAc(1)Neu5Ac(2)	P19827_VLSALQPSPTHSSSNTQR_Hex(1)HexNAc(1)Neu5Ac(2)	File25305 Spectrum9810 scans: 14821
P01834	QSGNSQESVTEQDSKDSTYSLSSTLTLSK		4280.000	3618.69	3	1207.24	3106.44	0.0572109	15.8098	1.5024e-15	153	8.029e-05	0.00146	511.1901	Fuc(1)Hex(1)HexNAc(1)	P01834_QSGNSQESVTEQDSKDSTYSLSSTLTLSK_Fuc(1)Hex(1)HexNAc(1)	File25305 Spectrum15650 scans: 20953
P02671	KMADEAGSEADHEGTHSTK	M2(Oxidation)	1640.000	2509.98	3	837.666	2015.85	-0.0479913	-19.1202	2.2824e-09	151	0.06275	0.00146	494.1748	HexNAc(1)Neu5Ac(1)	P02671_KMADEAGSEADHEGTHSTK_HexNAc(1)Neu5Ac(1)	File25305 Spectrum787 scans: 5341
Q14624	KIEETTMTTQTPAPIQAPSAILPLPGQSVER	M7(Oxidation);Q10(Deamidated)	4848.000	3831.89	4	958.979	3320.72	-0.020979	-5.47485	1.0764e-13	151	0.001183	0.00146	511.1901	Fuc(1)Hex(1)HexNAc(1)	Q14624_KIEETTMTTQTPAPIQAPSAILPLPGQSVER_Fuc(1)Hex(1)HexNAc(1)	File25305 Spectrum18748 scans: 24274
P04004	SYYQSCCTDYTAECKPQVTR	Q4(Deamidated);C6(Carbamidomethyl);C7(Carbamidomethyl);C14(Carbamidomethyl)	4189.000	3465.35	3	1156.12	2517.02	-0.000657864	-0.189841	2.5955e-09	150	0.01077	0.00146	947.3230	Hex(1)HexNAc(1)Neu5Ac(2)	P04004_SYYQSCCTDYTAECKPQVTR_Hex(1)HexNAc(1)Neu5Ac(2)	File25305 Spectrum15142 scans: 20419
P12259	APSHQQATTAGSPLR		2363.000	2177	3	726.673	1520.77	0.00121729	0.559158	7.6618e-10	150	0.002441	0.00146	656.2276	Hex(1)HexNAc(1)Neu5Ac(1)	P12259_APSHQQATTAGSPLR_Hex(1)HexNAc(1)Neu5Ac(1)	File25305 Spectrum4875 scans: 9634
P05155	SSNPNATSSSSQDPESLQDRGEGK	N5(Deamidated)	2527.000	2989.25	2	1495.63	2478.07	-0.0187001	-6.25578	3.5072e-11	149	0.001773	0.00146	511.1901	Fuc(1)Hex(1)HexNAc(1)	P05155_SSNPNATSSSSQDPESLQDRGEGK_Fuc(1)Hex(1)HexNAc(1)	File25305 Spectrum5810 scans: 10615
P02649	VQAAVGTSAAPVPSDNH		2810.000	1984.92	2	993.468	1619.79	-0.000701292	-0.35331	3.189e-11	149	0.000595	0.00146	365.1322	Hex(1)HexNAc(1)	P02649_VQAAVGTSAAPVPSDNH_Hex(1)HexNAc(1)	File25305 Spectrum7441 scans: 12333
P05155	NPNATSSSSQDPESLQDR	N3(Deamidated)	2409.000	2297.97	2	1149.99	1932.83	0.00514041	2.23694	4.7523e-11	149	0.005139	0.00146	365.1322	Hex(1)HexNAc(1)	P05155_NPNATSSSSQDPESLQDR_Hex(1)HexNAc(1)	File25305 Spectrum5137 scans: 9909
P19827	TFVLSALQPSPTHSSSNTQR		4040.000	2522.21	3	841.745	2157.08	-0.00197446	-0.782828	1.4952e-10	149	0.00145	0.00146	365.1322	Hex(1)HexNAc(1)	P19827_TFVLSALQPSPTHSSSNTQR_Hex(1)HexNAc(1)	File25305 Spectrum14313 scans: 19549
P19827	SALQPSPTHSSSNTQR		1955.000	2353.04	2	1177.53	1696.81	0.000372336	0.158236	2.1377e-10	148	0.001426	0.00146	656.2276	Hex(1)HexNAc(1)Neu5Ac(1)	P19827_SALQPSPTHSSSNTQR_Hex(1)HexNAc(1)Neu5Ac(1)	File25305 Spectrum2577 scans: 7221
P02671	GSESGIFTNTKESSSHHPGIAEFPSR		3436.000	3414.53	4	854.641	2758.29	0.0118087	3.45838	1.0175e-12	146	0.0005199	0.00146	656.2276	Hex(1)HexNAc(1)Neu5Ac(1)	P02671_GSESGIFTNTKESSSHHPGIAEFPSR_Hex(1)HexNAc(1)Neu5Ac(1)	File25305 Spectrum10974 scans: 16043
P12259	FTVNNLAEPQKAPSHQQATTAGSPLR		3566.000	3418.64	4	855.666	2762.41	-0.00109576	-0.320526	3.2365e-10	145	0.008496	0.00146	656.2276	Hex(1)HexNAc(1)Neu5Ac(1)	P12259_FTVNNLAEPQKAPSHQQATTAGSPLR_Hex(1)HexNAc(1)Neu5Ac(1)	File25305 Spectrum11692 scans: 16797
P02748	QYTTSYDPELTESSGSASHIDCR	C22(Carbamidomethyl)	4061.000	3550.45	3	1184.49	2603.11	0.0169808	4.78273	4.1107e-10	145	0.001034	0.00146	947.3230	Hex(1)HexNAc(1)Neu5Ac(2)	P02748_QYTTSYDPELTESSGSASHIDCR_Hex(1)HexNAc(1)Neu5Ac(2)	File25305 Spectrum14429 scans: 19671
P05155	SSNPNATSSSSQDPESLQDR		2745.000	2617.06	3	873.36	2105.91	-0.0425773	-16.2692	2.6158e-09	143	0.04066	0.00146	511.1901	Fuc(1)Hex(1)HexNAc(1)	P05155_SSNPNATSSSSQDPESLQDR_Fuc(1)Hex(1)HexNAc(1)	File25305 Spectrum7056 scans: 11929
P02649	VQAAVGTSAAPVPSDNH		3211.000	2567.12	3	856.716	1619.79	0.0116222	4.52734	9.7649e-10	143	0.01032	0.00146	947.3230	Hex(1)HexNAc(1)Neu5Ac(2)	P02649_VQAAVGTSAAPVPSDNH_Hex(1)HexNAc(1)Neu5Ac(2)	File25305 Spectrum9734 scans: 14741
P05155	NATSSSSQDPESLQDRGEGK	N1(Deamidated)	2208.000	2458.05	3	820.357	2092.91	0.00337166	1.37168	7.7428e-08	143	0.002207	0.00146	365.1322	Hex(1)HexNAc(1)	P05155_NATSSSSQDPESLQDRGEGK_Hex(1)HexNAc(1)	File25305 Spectrum3995 scans: 8710
Q96PD5	DGSPDVTTADIGANTPDATKGCPDVQASLPDAK	C22(Carbamidomethyl)	4095.000	4231.86	3	1411.63	3283.52	0.0167574	3.95982	1.8887e-11	142	0.0005488	0.00146	947.3230	Hex(1)HexNAc(1)Neu5Ac(2)	Q96PD5_DGSPDVTTADIGANTPDATKGCPDVQASLPDAK_Hex(1)HexNAc(1)Neu5Ac(2)	File25305 Spectrum14621 scans: 19872
P00450	EPEKVDKDNEDFQESNR		2697.000	2590.08	4	648.528	2077.92	-0.0301305	-11.633	3.4529e-10	142	0.009602	0.00146	511.1901	Fuc(1)Hex(1)HexNAc(1)	P00450_EPEKVDKDNEDFQESNR_Fuc(1)Hex(1)HexNAc(1)	File25305 Spectrum6778 scans: 11637
P19827	TFVLSALQPSPTHSSSNTQR		4614.000	3104.42	3	1035.81	2157.08	0.0148255	4.77563	2.6181e-09	141	0.003878	0.00146	947.3230	Hex(1)HexNAc(1)Neu5Ac(2)	P19827_TFVLSALQPSPTHSSSNTQR_Hex(1)HexNAc(1)Neu5Ac(2)	File25305 Spectrum17493 scans: 22889
P07996	PDQADTDNNGEGDACAADIDGDGILNER	C15(Carbamidomethyl)	3732.000	3282.35	3	1095.12	2917.19	0.0272547	8.3034	9.8232e-15	141	8.136e-05	0.00146	365.1322	Hex(1)HexNAc(1)	P07996_PDQADTDNNGEGDACAADIDGDGILNER_Hex(1)HexNAc(1)	File25305 Spectrum12613 scans: 17764
P0C0L4	LGVAHNNLMAMAQETGDNLYWGSVTGSQSNAVSPTPAPR	M9(Oxidation)	4154.000	4916.18	4	1230.05	4056.91	-0.0347183	-7.06206	1.2516e-12	141	0.00156	0.00146	859.3070	Hex(1)HexNAc(2)Neu5Ac(1)	P0C0L4_LGVAHNNLMAMAQETGDNLYWGSVTGSQSNAVSPTPAPR_Hex(1)HexNAc(2)Neu5Ac(1)	File25305 Spectrum14949 scans: 20217
Q13790	DANISQPETTKEGLR		2889.000	2605.16	3	869.393	1657.83	0.00554279	2.12762	1.3071e-10	141	0.001381	0.00146	947.3230	Hex(1)HexNAc(1)Neu5Ac(2)	Q13790_DANISQPETTKEGLR_Hex(1)HexNAc(1)Neu5Ac(2)	File25305 Spectrum7894 scans: 12809
P02790	TPLPPTSAHGNVAEGETKPDPDVTER		2956.000	2917.37	4	730.349	2714.31	-0.027658	-9.48047	2.3978e-10	140	0.002423	0.00146	203.0794	HexNAc(1)	P02790_TPLPPTSAHGNVAEGETKPDPDVTER_HexNAc(1)	File25305 Spectrum8290 scans: 13224
Q15942	HVQPQPQPKPQVQLHVQSQTQPVSLANTQPR		3257.000	3697.94	4	925.493	3494.85	0.013612	3.68096	4.2731e-14	140	0.0004637	0.00146	203.0794	HexNAc(1)	Q15942_HVQPQPQPKPQVQLHVQSQTQPVSLANTQPR_HexNAc(1)	File25305 Spectrum9991 scans: 15011
P02652	EPCVESLVSQYFQTVTDYGKDLMEK	C3(Carbamidomethyl);Q10(Deamidated)	4969.000	3914.73	3	1305.92	2966.36	0.04406	11.2549	5.0565e-11	140	0.002624	0.00146	947.3230	Hex(1)HexNAc(1)Neu5Ac(2)	P02652_EPCVESLVSQYFQTVTDYGKDLMEK_Hex(1)HexNAc(1)Neu5Ac(2)	File25305 Spectrum19400 scans: 24986
P02671	QFTSSTSYNRGDSTFESK		2988.000	2698.14	3	900.388	2040.9	0.00892431	3.30757	2.1335e-11	138	0.003446	0.00146	656.2276	Hex(1)HexNAc(1)Neu5Ac(1)	P02671_QFTSSTSYNRGDSTFESK_Hex(1)HexNAc(1)Neu5Ac(1)	File25305 Spectrum8474 scans: 13418
P05154	KRVEDLHVGATVAPSSR		2549.000	2477.22	3	826.747	1820.99	0.00647648	2.61441	8.1673e-08	137	0.04988	0.00146	656.2276	Hex(1)HexNAc(1)Neu5Ac(1)	P05154_KRVEDLHVGATVAPSSR_Hex(1)HexNAc(1)Neu5Ac(1)	File25305 Spectrum5938 scans: 10750
P0C0L4	LLGVAHNNLMAMAQETGDNLYWGSVTGSQSNAVSPTPAPR	M10(Oxidation);M12(Oxidation)	3507.000	4698.12	5	940.631	4185.98	-0.0601421	-12.8013	5.4608e-15	137	0.0001909	0.00146	511.1901	Fuc(1)Hex(1)HexNAc(1)	P0C0L4_LLGVAHNNLMAMAQETGDNLYWGSVTGSQSNAVSPTPAPR_Fuc(1)Hex(1)HexNAc(1)	File25305 Spectrum11365 scans: 16453
P02671	GTGSETESPRNPSSAGSWNSGSSGPGSTGNR		2851.000	3459.48	3	1154.17	2964.28	0.0223908	6.4723	7.9094e-13	136	0.0004204	0.00146	494.1748	HexNAc(1)Neu5Ac(1)	P02671_GTGSETESPRNPSSAGSWNSGSSGPGSTGNR_HexNAc(1)Neu5Ac(1)	File25305 Spectrum7683 scans: 12587
P0C0L5	GVAHNNLMAMAQETGDNLYWGSVTGSQSNAVSPTPAPR	Q12(Deamidated);N17(Deamidated)	4669.000	4295.98	4	1075	3929.79	0.0469605	10.9313	4.5506e-12	136	0.001546	0.00146	365.1322	Hex(1)HexNAc(1)	P0C0L5_GVAHNNLMAMAQETGDNLYWGSVTGSQSNAVSPTPAPR_Hex(1)HexNAc(1)	File25305 Spectrum17794 scans: 23205
P02656	DKFSEFWDLDPEVRPTSAVAA		4895.000	3326.48	3	1109.83	2379.14	0.0170793	5.13436	2.9422e-08	136	0.006005	0.00146	947.3230	Hex(1)HexNAc(1)Neu5Ac(2)	P02656_DKFSEFWDLDPEVRPTSAVAA_Hex(1)HexNAc(1)Neu5Ac(2)	File25305 Spectrum19001 scans: 24552
P01876	HYTNPSQDVTVPCPVPSTPPTPSPSTPPTPSPSCCHPR	C34(Carbamidomethyl);C35(Carbamidomethyl);C13(Carbamidomethyl)	3807.000	4995.19	4	1249.81	4135.88	0.00205994	0.412384	3.6129e-11	136	0.002386	0.00146	859.3070	Hex(1)HexNAc(2)Neu5Ac(1)	P01876_HYTNPSQDVTVPCPVPSTPPTPSPSTPPTPSPSCCHPR_Hex(1)HexNAc(2)Neu5Ac(1)	File25305 Spectrum13031 scans: 18203
P02751	HTSVQTTSSGSGPFTDVR		3180.000	2519.12	2	1260.57	1862.88	0.0155781	6.18396	5.4371e-09	135	0.004089	0.00146	656.2276	Hex(1)HexNAc(1)Neu5Ac(1)	P02751_HTSVQTTSSGSGPFTDVR_Hex(1)HexNAc(1)Neu5Ac(1)	File25305 Spectrum9562 scans: 14560
Q13790	DANISQPETTKEGLR		2528.000	2314.06	3	772.359	1657.83	0.00164279	0.709917	1.944e-08	135	0.003756	0.00146	656.2276	Hex(1)HexNAc(1)Neu5Ac(1)	Q13790_DANISQPETTKEGLR_Hex(1)HexNAc(1)Neu5Ac(1)	File25305 Spectrum5815 scans: 10621
P05155	NPNATSSSSQDPESLQDR	N3(Deamidated)	2665.000	2590.06	2	1296.04	1932.83	-0.00212823	-0.821692	1.0478e-08	134	0.003516	0.00146	656.2276	Hex(1)HexNAc(1)Neu5Ac(1)	P05155_NPNATSSSSQDPESLQDR_Hex(1)HexNAc(1)Neu5Ac(1)	File25305 Spectrum6595 scans: 11445
P02765	QPSGELFEIEIDTLETTCHVLDPTPVAR	C18(Carbamidomethyl)	5071.000	3677.81	3	1226.94	3166.55	0.0675254	18.3602	3.6788e-09	134	0.002168	0.00146	511.1901	Fuc(1)Hex(1)HexNAc(1)	P02765_QPSGELFEIEIDTLETTCHVLDPTPVAR_Fuc(1)Hex(1)HexNAc(1)	File25305 Spectrum19949 scans: 25589
P05154	VEDLHVGATVAPSSR		3327.000	2484.12	3	829.047	1536.79	0.00505054	2.03313	1.3708e-08	134	0.01547	0.00146	947.3230	Hex(1)HexNAc(1)Neu5Ac(2)	P05154_VEDLHVGATVAPSSR_Hex(1)HexNAc(1)Neu5Ac(2)	File25305 Spectrum10376 scans: 15415
P04275	KVNCTTQPCPTAKAPTCGLCEVAR	N3(Deamidated);C4(Carbamidomethyl);C9(Carbamidomethyl);C17(Carbamidomethyl);C20(Carbamidomethyl)	3388.000	3666.58	4	917.653	2719.26	0.00328325	0.895451	1.4819e-09	132	0.002401	0.00146	947.3230	Hex(1)HexNAc(1)Neu5Ac(2)	P04275_KVNCTTQPCPTAKAPTCGLCEVAR_Hex(1)HexNAc(1)Neu5Ac(2)	File25305 Spectrum10712 scans: 15768
P49747	QKDSDGDGIGDACDNCPQK	C13(Carbamidomethyl);C16(Carbamidomethyl)	2312.000	2591.05	3	864.69	2078.83	0.0294557	11.3683	1.1393e-10	131	0.00291	0.00146	511.1901	Fuc(1)Hex(1)HexNAc(1)	P49747_QKDSDGDGIGDACDNCPQK_Fuc(1)Hex(1)HexNAc(1)	File25305 Spectrum4581 scans: 9325
P02671	YGTGSETESPRNPSSAGSWNSGSSGPGSTGNR		2714.000	3622.53	3	1208.52	3127.35	0.00786225	2.17037	4.33e-11	131	0.0004175	0.00146	494.1748	HexNAc(1)Neu5Ac(1)	P02671_YGTGSETESPRNPSSAGSWNSGSSGPGSTGNR_HexNAc(1)Neu5Ac(1)	File25305 Spectrum6871 scans: 11734
P02671	HRHPDEAAFFDTASTGK		3034.000	2542.09	2	1272.05	1885.87	-0.00767689	-3.01991	5.6801e-09	131	0.005744	0.00146	656.2276	Hex(1)HexNAc(1)Neu5Ac(1)	P02671_HRHPDEAAFFDTASTGK_Hex(1)HexNAc(1)Neu5Ac(1)	File25305 Spectrum8740 scans: 13697
P00450	FNKNNEGTYYSPNYNPQSR		3074.000	2948.26	3	983.761	2292.02	0.0127975	4.3407	1.9397e-09	129	0.003374	0.00146	656.2276	Hex(1)HexNAc(1)Neu5Ac(1)	P00450_FNKNNEGTYYSPNYNPQSR_Hex(1)HexNAc(1)Neu5Ac(1)	File25305 Spectrum8964 scans: 13932
P05155	PNATSSSSQDPESLQDR	N2(Deamidated)	2668.000	2475.01	3	826.011	1818.79	-0.00440859	-1.78124	1.0866e-07	129	0.01958	0.00146	656.2276	Hex(1)HexNAc(1)Neu5Ac(1)	P05155_PNATSSSSQDPESLQDR_Hex(1)HexNAc(1)Neu5Ac(1)	File25305 Spectrum6609 scans: 11459
Q9UGM5	KFVSVTCDFFESQAPATGSENSAVNQKPTNLPK	C7(Carbamidomethyl)	4512.000	4108.89	3	1370.64	3597.74	-0.0397915	-9.68425	2.9377e-10	129	0.008942	0.00146	511.1901	Fuc(1)Hex(1)HexNAc(1)	Q9UGM5_KFVSVTCDFFESQAPATGSENSAVNQKPTNLPK_Fuc(1)Hex(1)HexNAc(1)	File25305 Spectrum16932 scans: 22300
P05155	NPNATSSSSQDPESLQDR	N3(Deamidated)	2827.000	2880.16	3	961.06	1932.83	0.00576394	2.00126	4.2323e-08	129	0.01646	0.00146	947.3230	Hex(1)HexNAc(1)Neu5Ac(2)	P05155_NPNATSSSSQDPESLQDR_Hex(1)HexNAc(1)Neu5Ac(2)	File25305 Spectrum7538 scans: 12435
P01876	HVKHYTNPSQDVTVPCPVPSTPPTPSPSTPPTPSPSCCHPR	C37(Carbamidomethyl);C38(Carbamidomethyl);C16(Carbamidomethyl)	3700.000	4704.12	4	1177.04	4500.1	-0.0694975	-14.7738	3.2713e-10	127	0.003568	0.00146	203.0794	HexNAc(1)	P01876_HVKHYTNPSQDVTVPCPVPSTPPTPSPSTPPTPSPSCCHPR_HexNAc(1)	File25305 Spectrum12434 scans: 17576
P02751	MVQPQSPVAVSQSKPGCYDNGK	Q5(Deamidated);C17(Carbamidomethyl)	2967.000	2872.34	3	958.452	2377.1	0.0531712	18.5115	4.5519e-10	127	0.006847	0.00146	494.1748	HexNAc(1)Neu5Ac(1)	P02751_MVQPQSPVAVSQSKPGCYDNGK_HexNAc(1)Neu5Ac(1)	File25305 Spectrum8355 scans: 13293
P05154	RVEDLHVGATVAPSSR		2881.000	2349.12	3	784.048	1692.89	0.0047395	2.01756	3.9872e-09	127	0.01033	0.00146	656.2276	Hex(1)HexNAc(1)Neu5Ac(1)	P05154_RVEDLHVGATVAPSSR_Hex(1)HexNAc(1)Neu5Ac(1)	File25305 Spectrum7850 scans: 12762
P00450	PEKVDKDNEDFQESNR		2397.000	2605.09	4	652.28	1948.88	-0.0109688	-4.21051	8.5569e-08	126	0.01023	0.00146	656.2276	Hex(1)HexNAc(1)Neu5Ac(1)	P00450_PEKVDKDNEDFQESNR_Hex(1)HexNAc(1)Neu5Ac(1)	File25305 Spectrum5065 scans: 9833
P01009	GDAAQKTDTSHHDQDHPTFNK		2204.000	2861.23	3	954.75	2349.04	-0.000612139	-0.213943	3.3742e-10	126	0.00206	0.00146	511.1901	Fuc(1)Hex(1)HexNAc(1)	P01009_GDAAQKTDTSHHDQDHPTFNK_Fuc(1)Hex(1)HexNAc(1)	File25305 Spectrum3973 scans: 8687
P19827	RTFVLSALQPSPTHSSSNTQR		3775.000	2969.42	3	990.814	2313.18	0.00911451	3.06946	4.0954e-10	126	0.001811	0.00146	656.2276	Hex(1)HexNAc(1)Neu5Ac(1)	P19827_RTFVLSALQPSPTHSSSNTQR_Hex(1)HexNAc(1)Neu5Ac(1)	File25305 Spectrum12853 scans: 18016
P01042	IASFSQNCDIYPGKDFVQPPTKICVGCPR	Q6(Deamidated);C8(Carbamidomethyl);C24(Carbamidomethyl);C27(Carbamidomethyl)	4546.000	4011.85	4	1003.97	3354.58	0.0392866	9.79262	1.3961e-11	125	0.001256	0.00146	656.2276	Hex(1)HexNAc(1)Neu5Ac(1)	P01042_IASFSQNCDIYPGKDFVQPPTKICVGCPR_Hex(1)HexNAc(1)Neu5Ac(1)	File25305 Spectrum17114 scans: 22491
Q14515	EHANSKQEEDNTQSDDILEESDQPTQVSK		3066.000	4248.8	4	1063.21	3300.45	0.0220298	5.18494	1.4018e-08	125	0.01178	0.00146	947.3230	Hex(1)HexNAc(1)Neu5Ac(2)	Q14515_EHANSKQEEDNTQSDDILEESDQPTQVSK_Hex(1)HexNAc(1)Neu5Ac(2)	File25305 Spectrum8922 scans: 13888
P19827	RTFVLSALQPSPTHSSSNTQR		3476.000	2678.32	4	670.588	2313.18	0.00693804	2.59044	8.3433e-08	125	0.005742	0.00146	365.1322	Hex(1)HexNAc(1)	P19827_RTFVLSALQPSPTHSSSNTQR_Hex(1)HexNAc(1)	File25305 Spectrum11198 scans: 16278
P04004	GDVFTMPEDEYTVYDDGEEKNNATVHEQVGGPSLTSDLQAQSK	M6(Oxidation);N21(Deamidated);Q28(Deamidated)	4482.000	4922.1	4	1231.53	4718.06	-0.0403401	-8.19571	1.9409e-08	125	0.01647	0.00146	203.0794	HexNAc(1)	P04004_GDVFTMPEDEYTVYDDGEEKNNATVHEQVGGPSLTSDLQAQSK_HexNAc(1)	File25305 Spectrum16768 scans: 22128
O75882	CVNGGRCNPGTGQCVCPAGWVGEQCQHCGGR	C1(Carbamidomethyl);C7(Carbamidomethyl);C14(Carbamidomethyl);C16(Carbamidomethyl);C25(Carbamidomethyl);C28(Carbamidomethyl)	3258.000	4130.67	4	1033.67	3474.41	0.0317409	7.68421	5.0108e-10	124	0.001262	0.00146	656.2276	Hex(1)HexNAc(1)Neu5Ac(1)	O75882_CVNGGRCNPGTGQCVCPAGWVGEQCQHCGGR_Hex(1)HexNAc(1)Neu5Ac(1)	File25305 Spectrum9994 scans: 15014
P0C0L4::P0C0L5	GSVTGSQSNAVSPTPAPR		2622.000	2659.19	2	1330.6	1711.85	0.0221212	8.31875	4.5579e-09	122	0.01821	0.00146	947.3230	Hex(1)HexNAc(1)Neu5Ac(2)	P0C0L4::P0C0L5_GSVTGSQSNAVSPTPAPR_Hex(1)HexNAc(1)Neu5Ac(2)	File25305 Spectrum6348 scans: 11180
P0C0L4::P0C0L5	GSVTGSQSNAVSPTPAPR		2536.000	2368.08	3	790.367	1711.85	0.00234471	0.990133	4.5851e-07	122	0.02428	0.00146	656.2276	Hex(1)HexNAc(1)Neu5Ac(1)	P0C0L4::P0C0L5_GSVTGSQSNAVSPTPAPR_Hex(1)HexNAc(1)Neu5Ac(1)	File25305 Spectrum5862 scans: 10670
P02787	TDFPQLCQLCPGCGCSTLNQYFGYSGAFK	Q5(Deamidated);C7(Carbamidomethyl);Q8(Deamidated);C10(Carbamidomethyl);C13(Carbamidomethyl);C15(Carbamidomethyl)	4833.000	4325.79	4	1082.45	3377.41	0.0460695	10.65	5.122e-12	122	0.000982	0.00146	947.3230	Hex(1)HexNAc(1)Neu5Ac(2)	P02787_TDFPQLCQLCPGCGCSTLNQYFGYSGAFK_Hex(1)HexNAc(1)Neu5Ac(2)	File25305 Spectrum18669 scans: 24187
P02790	CWSLAIATPLPPTSAHGNVAEGETKPDPDVTER	C1(Carbamidomethyl);N18(Deamidated)	2661.000	3719.69	3	1240.9	3516.68	-0.0696423	-18.7226	9.8644e-10	122	0.007608	0.00146	203.0794	HexNAc(1)	P02790_CWSLAIATPLPPTSAHGNVAEGETKPDPDVTER_HexNAc(1)	File25305 Spectrum6570 scans: 11415
P02647	LAEYHAKATEHLSTLSEK		2852.000	2974.36	4	744.598	2027.03	0.00632455	2.12636	3.0763e-08	121	0.005405	0.00146	947.3230	Hex(1)HexNAc(1)Neu5Ac(2)	P02647_LAEYHAKATEHLSTLSEK_Hex(1)HexNAc(1)Neu5Ac(2)	File25305 Spectrum7686 scans: 12590
P02768	YLSVVLNQLCVLHEK	C10(Carbamidomethyl)	4938.000	2673.31	3	892.112	1813.98	0.03053	11.4203	1.4988e-07	121	0.03229	0.00146	859.3070	Hex(1)HexNAc(2)Neu5Ac(1)	P02768_YLSVVLNQLCVLHEK_Hex(1)HexNAc(2)Neu5Ac(1)	File25305 Spectrum19233 scans: 24805
P02671	GGSTSYGTGSETESPRN		2145.000	2341.95	3	781.656	1685.71	0.00538465	2.29922	5.3912e-08	121	0.04945	0.00146	656.2276	Hex(1)HexNAc(1)Neu5Ac(1)	P02671_GGSTSYGTGSETESPRN_Hex(1)HexNAc(1)Neu5Ac(1)	File25305 Spectrum3639 scans: 8336
P04004	VFTMPEDEYTVYDDGEEKNNATVHEQVGGPSLTSDLQAQSK	N19(Deamidated)	4359.000	4935.18	4	1234.8	4529.03	-0.00903448	-1.83063	6.706e-10	121	0.001349	0.00146	406.1587	HexNAc(2)	P04004_VFTMPEDEYTVYDDGEEKNNATVHEQVGGPSLTSDLQAQSK_HexNAc(2)	File25305 Spectrum16086 scans: 21412
P02787	APCADGTDFPQLCQLCPGCGCSTLNQYFGYSGAFK	C3(Carbamidomethyl);Q11(Deamidated);C13(Carbamidomethyl);Q14(Deamidated);C16(Carbamidomethyl);C19(Carbamidomethyl);C21(Carbamidomethyl)	4830.000	4355.78	3	1452.93	3948.62	0.000599461	0.137624	8.7761e-13	120	0.0001834	0.00146	406.1587	HexNAc(2)	P02787_APCADGTDFPQLCQLCPGCGCSTLNQYFGYSGAFK_HexNAc(2)	File25305 Spectrum18654 scans: 24170
P01042	FSQNCDIYPGKDFVQPPTKICVGCPR	C5(Carbamidomethyl);C21(Carbamidomethyl);C24(Carbamidomethyl)	4203.000	3594.65	4	899.669	3082.45	0.00600836	1.67147	2.7771e-09	120	0.002246	0.00146	511.1901	Fuc(1)Hex(1)HexNAc(1)	P01042_FSQNCDIYPGKDFVQPPTKICVGCPR_Fuc(1)Hex(1)HexNAc(1)	File25305 Spectrum15224 scans: 20505
P02790	TPLPPTSAHGNVAEGETKPDPDVTER	N11(Deamidated)	3160.000	3122.46	3	1041.83	2715.3	-0.00506577	-1.62237	4.362e-09	119	0.004251	0.00146	406.1587	HexNAc(2)	P02790_TPLPPTSAHGNVAEGETKPDPDVTER_HexNAc(2)	File25305 Spectrum9449 scans: 14442
A0A075B6I4	GNSNIVGNQGAAWLQQHQGHPPK	N2(Deamidated)	3915.000	3297.55	3	1100.19	2438.18	0.0566175	17.1696	5.5623e-09	119	0.004705	0.00146	859.3070	Hex(1)HexNAc(2)Neu5Ac(1)	A0A075B6I4_GNSNIVGNQGAAWLQQHQGHPPK_Hex(1)HexNAc(2)Neu5Ac(1)	File25305 Spectrum13621 scans: 18822
P01876	HYTNPSQDVTVPCPVPSTPPTPSPSTPPTPSPSCCHPR	C34(Carbamidomethyl);C35(Carbamidomethyl);Q7(Deamidated);C13(Carbamidomethyl)	3859.000	4794.13	5	959.833	4136.87	0.0299992	6.2575	3.8771e-10	119	0.00287	0.00146	656.2276	Hex(1)HexNAc(1)Neu5Ac(1)	P01876_HYTNPSQDVTVPCPVPSTPPTPSPSTPPTPSPSCCHPR_Hex(1)HexNAc(1)Neu5Ac(1)	File25305 Spectrum13318 scans: 18504
P0C0L4	LLGVAHNNLMAMAQETGDNLYWGSVTGSQSNAVSPTPAPR	M10(Oxidation);M12(Oxidation);N19(Deamidated)	3436.000	4682.11	5	937.43	4186.97	-0.0333577	-7.12449	2.3857e-11	119	0.0007979	0.00146	494.1748	HexNAc(1)Neu5Ac(1)	P0C0L4_LLGVAHNNLMAMAQETGDNLYWGSVTGSQSNAVSPTPAPR_HexNAc(1)Neu5Ac(1)	File25305 Spectrum10976 scans: 16045
P02671	GGSTSYGTGSETESPR		1959.000	1936.81	2	969.41	1571.67	0.00308858	1.59468	2.8862e-10	119	0.009314	0.00146	365.1322	Hex(1)HexNAc(1)	P02671_GGSTSYGTGSETESPR_Hex(1)HexNAc(1)	File25305 Spectrum2597 scans: 7242
P02790	ATPLPPTSAHGNVAEGETKPDPDVTER		3080.000	4608.99	4	1153.26	2785.35	-0.0034718	-0.753266	7.7729e-07	118	0.01383	0.00146	1823.6453	Fuc(1)Hex(3)HexNAc(3)Neu5Ac(2)	P02790_ATPLPPTSAHGNVAEGETKPDPDVTER_Fuc(1)Hex(3)HexNAc(3)Neu5Ac(2)	File25305 Spectrum8995 scans: 13965
P04196	SSTTKPPFKPHGSR		1648.000	1890.94	4	473.741	1525.8	0.00456899	2.41626	2.5425e-08	118	0.005351	0.00146	365.1322	Hex(1)HexNAc(1)	P04196_SSTTKPPFKPHGSR_Hex(1)HexNAc(1)	File25305 Spectrum838 scans: 5395
P04275	CAPACQVTCQHPEPLACPVQCVEGCHAHCPPGK	C1(Carbamidomethyl);C5(Carbamidomethyl);Q6(Deamidated);C9(Carbamidomethyl);Q10(Deamidated);C17(Carbamidomethyl);C21(Carbamidomethyl);C25(Carbamidomethyl);C29(Carbamidomethyl)	3412.000	4179.75	4	1045.94	3813.57	0.0435245	10.4132	4.4041e-10	118	0.002421	0.00146	365.1322	Hex(1)HexNAc(1)	P04275_CAPACQVTCQHPEPLACPVQCVEGCHAHCPPGK_Hex(1)HexNAc(1)	File25305 Spectrum10845 scans: 15907
P04196	SSTTKPPFKPHGSR		1824.000	2473.12	4	619.288	1525.8	-0.00143101	-0.578626	1.1236e-06	118	0.01872	0.00146	947.3230	Hex(1)HexNAc(1)Neu5Ac(2)	P04196_SSTTKPPFKPHGSR_Hex(1)HexNAc(1)Neu5Ac(2)	File25305 Spectrum1829 scans: 6435
P0C0L4::P0C0L5	GDNLYWGSVTGSQSNAVSPTPAPR	N3(Deamidated)	3423.000	2827.25	3	943.425	2461.15	-0.0322793	-11.4172	9.5408e-10	117	0.005287	0.00146	365.1322	Hex(1)HexNAc(1)	P0C0L4::P0C0L5_GDNLYWGSVTGSQSNAVSPTPAPR_Hex(1)HexNAc(1)	File25305 Spectrum10903 scans: 15968
Q13790	DANISQPETTKEGLR		2504.000	2022.96	3	675.328	1657.83	0.00374279	1.85015	1.8821e-08	117	0.00696	0.00146	365.1322	Hex(1)HexNAc(1)	Q13790_DANISQPETTKEGLR_Hex(1)HexNAc(1)	File25305 Spectrum5674 scans: 10473
P02671	TGSETESPRNPSSAGSWNSGSSGPGSTGNR	N10(Deamidated);N18(Deamidated)	2849.000	3566.49	3	1189.84	2909.23	0.0267234	7.49291	5.6772e-09	117	0.001973	0.00146	656.2276	Hex(1)HexNAc(1)Neu5Ac(1)	P02671_TGSETESPRNPSSAGSWNSGSSGPGSTGNR_Hex(1)HexNAc(1)Neu5Ac(1)	File25305 Spectrum7667 scans: 12570
P01876	HVKHYTNPSQDVTVPCPVPSTPPTPSPSTPPTPSPSCCHPR	C37(Carbamidomethyl);C38(Carbamidomethyl);C16(Carbamidomethyl)	3664.000	4907.21	4	1227.81	4500.1	-0.0595975	-12.1449	7.2464e-08	117	0.01892	0.00146	406.1587	HexNAc(2)	P01876_HVKHYTNPSQDVTVPCPVPSTPPTPSPSTPPTPSPSCCHPR_HexNAc(2)	File25305 Spectrum12234 scans: 17366
P01023	ASDCHGEDSQAFCEK	C4(Carbamidomethyl);C13(Carbamidomethyl)	2428.000	2104.78	2	1053.4	1739.65	-0.00590096	-2.8036	1.1407e-09	117	0.003077	0.00146	365.1322	Hex(1)HexNAc(1)	P01023_ASDCHGEDSQAFCEK_Hex(1)HexNAc(1)	File25305 Spectrum5245 scans: 10022
P02774	AKLPDATPTELAK		3172.000	2009.98	2	1006	1353.75	0.00226608	1.12742	1.5473e-06	116	0.01072	0.00146	656.2276	Hex(1)HexNAc(1)Neu5Ac(1)	P02774_AKLPDATPTELAK_Hex(1)HexNAc(1)Neu5Ac(1)	File25305 Spectrum9516 scans: 14512
P02671	GGSTSYGTGSETESPRNPSSAGSWNSGSSGPGSTGNR		2723.000	3882.65	4	971.669	3516.5	0.011623	2.99357	2.8886e-09	114	0.002045	0.00146	365.1322	Hex(1)HexNAc(1)	P02671_GGSTSYGTGSETESPRNPSSAGSWNSGSSGPGSTGNR_Hex(1)HexNAc(1)	File25305 Spectrum6925 scans: 11791
P02751	HTSVQTTSSGSGPFTDVR		2834.000	2228.01	3	743.677	1862.88	0.00140166	0.629108	1.6364e-07	113	0.03078	0.00146	365.1322	Hex(1)HexNAc(1)	P02751_HTSVQTTSSGSGPFTDVR_Hex(1)HexNAc(1)	File25305 Spectrum7583 scans: 12482
P00747	KIPSCDSSPVSTEQLAPTAPPELTPVVQDCYHGDGQSYR	C5(Carbamidomethyl);Q14(Deamidated);C30(Carbamidomethyl)	4454.000	4944.25	4	1237.07	4286.97	0.0416082	8.41547	3.8427e-08	113	0.004607	0.00146	656.2276	Hex(1)HexNAc(1)Neu5Ac(1)	P00747_KIPSCDSSPVSTEQLAPTAPPELTPVVQDCYHGDGQSYR_Hex(1)HexNAc(1)Neu5Ac(1)	File25305 Spectrum16609 scans: 21961
P01042	SVSEINPTTQMK	M11(Oxidation)	2537.000	2005.88	2	1003.95	1349.65	-3.36213e-05	-0.0167614	3.6339e-06	113	0.1092	0.00146	656.2276	Hex(1)HexNAc(1)Neu5Ac(1)	P01042_SVSEINPTTQMK_Hex(1)HexNAc(1)Neu5Ac(1)	File25305 Spectrum5866 scans: 10674
Q9UK55	SPQSPETPAPQNQTSR	N12(Deamidated)	2281.000	2381.03	3	794.683	1724.8	0.00151462	0.636121	2.059e-06	113	0.004928	0.00146	656.2276	Hex(1)HexNAc(1)Neu5Ac(1)	Q9UK55_SPQSPETPAPQNQTSR_Hex(1)HexNAc(1)Neu5Ac(1)	File25305 Spectrum4403 scans: 9138
P01834	ALQSGNSQESVTEQDSK		2679.000	2172.92	2	1087.47	1806.82	-0.0423863	-19.5066	8.8247e-09	112	0.01718	0.00146	365.1322	Hex(1)HexNAc(1)	P01834_ALQSGNSQESVTEQDSK_Hex(1)HexNAc(1)	File25305 Spectrum6677 scans: 11531
P01042	SVSEINPTTQMK		3203.000	2280.99	2	1141.5	1333.65	0.010081	4.41958	1.0876e-08	111	0.006464	0.00146	947.3230	Hex(1)HexNAc(1)Neu5Ac(2)	P01042_SVSEINPTTQMK_Hex(1)HexNAc(1)Neu5Ac(2)	File25305 Spectrum9691 scans: 14696
P02748	TTSYDPELTESSGSASHIDCR	C20(Carbamidomethyl)	3948.000	3259.36	3	1087.46	2311.99	0.0458869	14.0785	9.8555e-08	111	0.008827	0.00146	947.3230	Hex(1)HexNAc(1)Neu5Ac(2)	P02748_TTSYDPELTESSGSASHIDCR_Hex(1)HexNAc(1)Neu5Ac(2)	File25305 Spectrum13807 scans: 19017
P02768	TLEKCCAAADPHECYAK	C5(Carbamidomethyl);C6(Carbamidomethyl);C14(Carbamidomethyl)	3051.000	2679.12	3	894.046	2022.86	0.0291039	10.8633	4.2577e-08	111	0.02769	0.00146	656.2276	Hex(1)HexNAc(1)Neu5Ac(1)	P02768_TLEKCCAAADPHECYAK_Hex(1)HexNAc(1)Neu5Ac(1)	File25305 Spectrum8838 scans: 13800
P00734	PHKPEINSTTHPGADLQENFCR	C21(Carbamidomethyl)	3075.000	2954.38	4	739.602	2547.19	0.0244566	8.27809	5.281e-09	110	0.004045	0.00146	406.1587	HexNAc(2)	P00734_PHKPEINSTTHPGADLQENFCR_HexNAc(2)	File25305 Spectrum8972 scans: 13941
P02671	GPGSTGSWNSGSSGTGSTGNQNPGSPRPGSTGTWNPGSSER	N9(Deamidated);N20(Deamidated)	3076.000	4417.94	4	1105.49	3905.67	0.0762041	17.2488	1.913e-08	109	0.002553	0.00146	511.1901	Fuc(1)Hex(1)HexNAc(1)	P02671_GPGSTGSWNSGSSGTGSTGNQNPGSPRPGSTGTWNPGSSER_Fuc(1)Hex(1)HexNAc(1)	File25305 Spectrum8974 scans: 13943
P17936	SAGSVESPSVSSTHR		2432.000	2434.02	3	812.349	1486.7	-0.0002284	-0.0938366	8.8304e-05	108	0.03508	0.00146	947.3230	Hex(1)HexNAc(1)Neu5Ac(2)	P17936_SAGSVESPSVSSTHR_Hex(1)HexNAc(1)Neu5Ac(2)	File25305 Spectrum5265 scans: 10043
P01859	SSVVTVPSSNFGTQTYTCNVDHKPSNTKVDK	C18(Carbamidomethyl)	3789.000	3600.75	5	721.157	3396.63	0.042751	11.8728	1.4754e-11	108	0.0008678	0.00146	203.0794	HexNAc(1)	P01859_SSVVTVPSSNFGTQTYTCNVDHKPSNTKVDK_HexNAc(1)	File25305 Spectrum12931 scans: 18098
P02671	ETESPRNPSSAGSWNSGSSGPGSTGNR	N7(Deamidated);N15(Deamidated)	2780.000	3523.49	4	881.881	2664.13	0.0586862	16.6557	2.2123e-06	108	0.1068	0.00146	859.3070	Hex(1)HexNAc(2)Neu5Ac(1)	P02671_ETESPRNPSSAGSWNSGSSGPGSTGNR_Hex(1)HexNAc(2)Neu5Ac(1)	File25305 Spectrum7263 scans: 12146
P01859	SSVVTVPSSNFGTQTYTCNVDHKPSNTK	C18(Carbamidomethyl)	3969.000	3258.58	2	1630.3	3054.44	0.0599004	18.3824	2.3326e-08	108	0.02149	0.00146	203.0794	HexNAc(1)	P01859_SSVVTVPSSNFGTQTYTCNVDHKPSNTK_HexNAc(1)	File25305 Spectrum13919 scans: 19135
P01860	SCDTPPPCPR	C2(Carbamidomethyl);C8(Carbamidomethyl)	2479.000	2132.82	2	1067.42	1185.49	0.00496947	2.33	3.259e-05	108	0.1169	0.002698	947.3230	Hex(1)HexNAc(1)Neu5Ac(2)	P01860_SCDTPPPCPR_Hex(1)HexNAc(1)Neu5Ac(2)	File25305 Spectrum5532 scans: 10324
P98160	AGQAAHTCFLDTDGHPTCDACSPGHSGR	C8(Carbamidomethyl);C18(Carbamidomethyl);C21(Carbamidomethyl)	3687.000	4805.94	5	962.195	2982.22	0.0721469	15.012	1.6706e-07	108	0.01951	0.00146	1823.6453	Fuc(1)Hex(3)HexNAc(3)Neu5Ac(2)	P98160_AGQAAHTCFLDTDGHPTCDACSPGHSGR_Fuc(1)Hex(3)HexNAc(3)Neu5Ac(2)	File25305 Spectrum12361 scans: 17499
P04004	MPEDEYTVYDDGEEKNNATVHEQVGGPSLTSDLQAQSK	N16(Deamidated);N17(Deamidated)	4165.000	4840.08	4	1211.03	4182.83	0.0156876	3.24119	3.0474e-07	108	0.009246	0.00146	656.2276	Hex(1)HexNAc(1)Neu5Ac(1)	P04004_MPEDEYTVYDDGEEKNNATVHEQVGGPSLTSDLQAQSK_Hex(1)HexNAc(1)Neu5Ac(1)	File25305 Spectrum15010 scans: 20281
Q14624	DDQEQSQVAEKPMEGESR	Q5(Deamidated)	2615.000	2923.15	3	975.39	2062.87	-0.0363403	-12.4319	1.2827e-06	108	0.02257	0.00146	859.3070	Hex(1)HexNAc(2)Neu5Ac(1)	Q14624_DDQEQSQVAEKPMEGESR_Hex(1)HexNAc(2)Neu5Ac(1)	File25305 Spectrum6306 scans: 11136
Q92954	KTITTTEIMNKPEETAKPK		2536.000	2815.39	4	704.854	2159.15	0.00812395	2.88555	1.8377e-06	107	0.02564	0.00146	656.2276	Hex(1)HexNAc(1)Neu5Ac(1)	Q92954_KTITTTEIMNKPEETAKPK_Hex(1)HexNAc(1)Neu5Ac(1)	File25305 Spectrum5859 scans: 10667
P12259	FTVNNLAEPQKAPSHQQATTAGSPLR		3312.000	3127.56	4	782.898	2762.41	0.0211042	6.74782	5.1545e-07	107	0.012	0.00146	365.1322	Hex(1)HexNAc(1)	P12259_FTVNNLAEPQKAPSHQQATTAGSPLR_Hex(1)HexNAc(1)	File25305 Spectrum10293 scans: 15328
Q16610	EGTPAPFGDQSHPEPESWNAAQHCQQDR	C24(Carbamidomethyl)	3448.000	4122.68	4	1031.68	3175.34	0.0100569	2.4394	2.3857e-06	105	0.05773	0.00146	947.3230	Hex(1)HexNAc(1)Neu5Ac(2)	Q16610_EGTPAPFGDQSHPEPESWNAAQHCQQDR_Hex(1)HexNAc(1)Neu5Ac(2)	File25305 Spectrum11041 scans: 16113
P02768	VNEVTEFAKTCVADESAENCDK	N2(Deamidated);C11(Carbamidomethyl);C20(Carbamidomethyl)	2978.000	2922.2	3	975.075	2516.07	-0.0229282	-7.8462	2.1179e-07	105	0.04744	0.00146	406.1587	HexNAc(2)	P02768_VNEVTEFAKTCVADESAENCDK_HexNAc(2)	File25305 Spectrum8416 scans: 13357
P02671	GGSTSYGTGSETESPR		2229.000	2227.9	2	1114.96	1571.67	0.00668858	3.00219	1.9421e-10	104	0.00165	0.00146	656.2276	Hex(1)HexNAc(1)Neu5Ac(1)	P02671_GGSTSYGTGSETESPR_Hex(1)HexNAc(1)Neu5Ac(1)	File25305 Spectrum4114 scans: 8835
Q9UGM5	FVSVTCDFFESQAPATGSENSAVNQKPTNLPKVEESQQK	C6(Carbamidomethyl);Q12(Deamidated);N20(Deamidated)	4491.000	4957.31	3	1653.44	4300.01	0.065225	13.1573	6.9925e-08	103	0.01242	0.00146	656.2276	Hex(1)HexNAc(1)Neu5Ac(1)	Q9UGM5_FVSVTCDFFESQAPATGSENSAVNQKPTNLPKVEESQQK_Hex(1)HexNAc(1)Neu5Ac(1)	File25305 Spectrum16815 scans: 22177
P05155	PNATSSSSQDPESLQDRGEGK	N2(Deamidated)	2424.000	2846.2	3	949.74	2189.97	0.0030078	1.05678	7.994e-06	103	0.009076	0.00146	656.2276	Hex(1)HexNAc(1)Neu5Ac(1)	P05155_PNATSSSSQDPESLQDRGEGK_Hex(1)HexNAc(1)Neu5Ac(1)	File25305 Spectrum5222 scans: 9998
P01859::P01861	CNVDHKPSNTKVDK	C1(Carbamidomethyl)	1720.000	2005.95	2	1003.98	1640.79	0.0255935	12.7588	2.3706e-07	102	0.01111	0.00146	365.1322	Hex(1)HexNAc(1)	P01859::P01861_CNVDHKPSNTKVDK_Hex(1)HexNAc(1)	File25305 Spectrum1245 scans: 5822
P01860::P01857	CNVNHKPSNTKVDK	C1(Carbamidomethyl);N4(Deamidated)	1720.000	2005.95	2	1003.98	1640.79	0.0255935	12.7588	2.3706e-07	102	0.01111	0.00146	365.1322	Hex(1)HexNAc(1)	P01860::P01857_CNVNHKPSNTKVDK_Hex(1)HexNAc(1)	File25305 Spectrum1245 scans: 5822
P05154	KRVEDLHVGATVAPSSR		2719.000	2768.32	3	923.781	1820.99	0.0112765	4.0734	2.5464e-05	101	0.02042	0.00146	947.3230	Hex(1)HexNAc(1)Neu5Ac(2)	P05154_KRVEDLHVGATVAPSSR_Hex(1)HexNAc(1)Neu5Ac(2)	File25305 Spectrum6903 scans: 11768
P0C0L5	ADLRGVAHNNLMAMAQETGDNLYWGSVTGSQSNAVSPTPAPR	N10(Deamidated);Q16(Deamidated);N21(Deamidated)	4723.000	4589.07	6	765.852	4386.03	-0.0373713	-8.14355	4.4768e-08	101	0.001598	0.00146	203.0794	HexNAc(1)	P0C0L5_ADLRGVAHNNLMAMAQETGDNLYWGSVTGSQSNAVSPTPAPR_HexNAc(1)	File25305 Spectrum18084 scans: 23521
P02671	YGTGSETESPRNPSSAGSWNSGSSGPGSTGNR	N20(Deamidated)	2905.000	3534.52	4	884.637	3128.33	0.0294388	8.32895	3.1022e-07	101	0.006409	0.00146	406.1587	HexNAc(2)	P02671_YGTGSETESPRNPSSAGSWNSGSSGPGSTGNR_HexNAc(2)	File25305 Spectrum7992 scans: 12912
P04004	SYYQSCCTDYTAECKPQVTR	C6(Carbamidomethyl);C7(Carbamidomethyl);C14(Carbamidomethyl)	4203.000	3375.34	3	1126.12	2516.04	-0.00497363	-1.47352	2.9366e-06	100	0.04867	0.00146	859.3070	Hex(1)HexNAc(2)Neu5Ac(1)	P04004_SYYQSCCTDYTAECKPQVTR_Hex(1)HexNAc(2)Neu5Ac(1)	File25305 Spectrum15221 scans: 20502
P04004	TMPEDEYTVYDDGEEKNNATVHEQVGGPSLTSDLQAQSK		4450.000	4938.06	4	1235.52	4281.91	-0.077491	-15.6926	2.0546e-06	100	0.04186	0.00146	656.2276	Hex(1)HexNAc(1)Neu5Ac(1)	P04004_TMPEDEYTVYDDGEEKNNATVHEQVGGPSLTSDLQAQSK_Hex(1)HexNAc(1)Neu5Ac(1)	File25305 Spectrum16588 scans: 21939
P04196	SSTTKPPFKPHGSR		1642.000	2182.03	2	1092.02	1525.8	-0.000878078	-0.402414	2.6255e-06	100	0.0148	0.00146	656.2276	Hex(1)HexNAc(1)Neu5Ac(1)	P04196_SSTTKPPFKPHGSR_Hex(1)HexNAc(1)Neu5Ac(1)	File25305 Spectrum802 scans: 5357
P13671	GQACFCDHYAWTQWTSCSKTCNSGTQSR	C4(Carbamidomethyl);C6(Carbamidomethyl);Q13(Deamidated);C17(Carbamidomethyl);C21(Carbamidomethyl)	3080.000	3791.46	4	948.872	3384.34	-0.0479879	-12.6568	5.6031e-09	100	0.01453	0.00146	406.1587	HexNAc(2)	P13671_GQACFCDHYAWTQWTSCSKTCNSGTQSR_HexNAc(2)	File25305 Spectrum8998 scans: 13968
P00450	PEKVDKDNEDFQESNR		2522.000	2151.94	3	718.319	1948.88	-0.0198923	-9.24391	1.3224e-06	100	0.01024	0.00146	203.0794	HexNAc(1)	P00450_PEKVDKDNEDFQESNR_HexNAc(1)	File25305 Spectrum5782 scans: 10586
P04196	SSTTKPPFKPHGSR		1650.000	1729.89	4	433.48	1525.8	0.00730035	4.22012	9.8926e-06	99	0.03211	0.00146	203.0794	HexNAc(1)	P04196_SSTTKPPFKPHGSR_HexNAc(1)	File25305 Spectrum847 scans: 5404
P19827	SALQPSPTHSSSNTQR		1704.000	2061.95	3	688.322	1696.81	0.000295869	0.14349	4.5098e-06	99	0.01605	0.00146	365.1322	Hex(1)HexNAc(1)	P19827_SALQPSPTHSSSNTQR_Hex(1)HexNAc(1)	File25305 Spectrum1156 scans: 5729
P01860	LSSVVTVPSSSLGTQTYTCNVNHKPSNTKVDK	Q15(Deamidated);C19(Carbamidomethyl);N22(Deamidated)	3823.000	3653.77	4	914.451	3449.7	-0.00740314	-2.02616	3.3318e-09	99	0.002201	0.00146	203.0794	HexNAc(1)	P01860_LSSVVTVPSSSLGTQTYTCNVNHKPSNTKVDK_HexNAc(1)	File25305 Spectrum13115 scans: 18291
P01834	ALQSGNSQESVTEQDSK		2727.000	2213.97	2	1107.99	1806.82	-0.0178863	-8.07883	6.8702e-06	99	0.06281	0.00146	406.1587	HexNAc(2)	P01834_ALQSGNSQESVTEQDSK_HexNAc(2)	File25305 Spectrum6954 scans: 11822
P01042	KESNEELTESCETKK	N4(Deamidated);C11(Carbamidomethyl)	2075.000	2468.99	3	824.005	1811.81	-0.0452865	-18.3421	5.0024e-05	99	0.2324	0.003723	656.2276	Hex(1)HexNAc(1)Neu5Ac(1)	P01042_KESNEELTESCETKK_Hex(1)HexNAc(1)Neu5Ac(1)	File25305 Spectrum3252 scans: 7930
P02671	GSWNSGSSGPGSTGNR	N4(Deamidated)	2578.000	2001.77	3	668.265	1507.63	-0.0315917	-15.7819	1.6657e-09	98	0.01729	0.00146	494.1748	HexNAc(1)Neu5Ac(1)	P02671_GSWNSGSSGPGSTGNR_HexNAc(1)Neu5Ac(1)	File25305 Spectrum6105 scans: 10925
P02790	MPCPGRGHGHRNGTGHGNSTHHGPEYMR	M1(Oxidation);C3(Carbamidomethyl);N12(Deamidated);N18(Deamidated)	1853.000	4058.56	4	1015.65	3111.31	-0.070426	-17.3525	4.1317e-06	98	0.0565	0.00146	947.3230	Hex(1)HexNAc(1)Neu5Ac(2)	P02790_MPCPGRGHGHRNGTGHGNSTHHGPEYMR_Hex(1)HexNAc(1)Neu5Ac(2)	File25305 Spectrum1992 scans: 6607
P01042	IASFSQNCDIYPGKDFVQPPTK	C8(Carbamidomethyl)	4389.000	3168.45	3	1057.16	2511.21	0.00859161	2.71161	1.3249e-08	98	0.003667	0.00146	656.2276	Hex(1)HexNAc(1)Neu5Ac(1)	P01042_IASFSQNCDIYPGKDFVQPPTK_Hex(1)HexNAc(1)Neu5Ac(1)	File25305 Spectrum16253 scans: 21587
P24593	SKFVGGAENTAHPR		2083.000	2330.03	3	777.684	1469.74	-0.0163229	-7.00545	0.00010809	97	0.05904	0.00146	859.3070	Hex(1)HexNAc(2)Neu5Ac(1)	P24593_SKFVGGAENTAHPR_Hex(1)HexNAc(2)Neu5Ac(1)	File25305 Spectrum3294 scans: 7974
P01834	VQWKVDNALQSGNSQESVTEQDSK	Q2(Deamidated);N7(Deamidated)	2597.000	2881.34	3	961.455	2678.23	0.0324228	11.2527	1.2095e-08	97	0.01979	0.00146	203.0794	HexNAc(1)	P01834_VQWKVDNALQSGNSQESVTEQDSK_HexNAc(1)	File25305 Spectrum6210 scans: 11035
P02787	VPQNTGGKNPDPWAK		2542.000	1973.97	2	987.994	1607.81	0.032174	16.2991	2.6397e-08	97	0.006359	0.00146	365.1322	Hex(1)HexNAc(1)	P02787_VPQNTGGKNPDPWAK_Hex(1)HexNAc(1)	File25305 Spectrum5894 scans: 10704
P02671	SWNSGSSGTGSTGNQNPGSPRPGSTGTWNPGSSER		3240.000	4104.78	3	1369.27	3447.51	0.0444737	10.8346	1.4791e-06	96	0.007171	0.00146	656.2276	Hex(1)HexNAc(1)Neu5Ac(1)	P02671_SWNSGSSGTGSTGNQNPGSPRPGSTGTWNPGSSER_Hex(1)HexNAc(1)Neu5Ac(1)	File25305 Spectrum9894 scans: 14909
P02768	TECCHGDLLECADDRADLAKYICENQDSISSK	C3(Carbamidomethyl);C4(Carbamidomethyl);C11(Carbamidomethyl);C23(Carbamidomethyl)	4362.000	4178.78	5	836.764	3772.61	0.0150941	3.61208	2.5715e-07	94	0.004659	0.00146	406.1587	HexNAc(2)	P02768_TECCHGDLLECADDRADLAKYICENQDSISSK_HexNAc(2)	File25305 Spectrum16106 scans: 21433
P01859	VVTVPSSNFGTQTYTCNVDHKPSNTK	C16(Carbamidomethyl)	4068.000	3286.56	4	822.646	2880.37	0.025373	7.72023	6.8964e-07	94	0.01014	0.00146	406.1587	HexNAc(2)	P01859_VVTVPSSNFGTQTYTCNVDHKPSNTK_HexNAc(2)	File25305 Spectrum14468 scans: 19712
P02790	LPPTSAHGNVAEGETKPDPDVTER		2925.000	3464.54	4	867.143	2516.21	0.00431571	1.24568	0.0001916	94	0.03543	0.00146	947.3230	Hex(1)HexNAc(1)Neu5Ac(2)	P02790_LPPTSAHGNVAEGETKPDPDVTER_Hex(1)HexNAc(1)Neu5Ac(2)	File25305 Spectrum8104 scans: 13029
P02671	STSYGTGSETESPRNPSSAGSWNSGSSGPGSTGNR	N15(Deamidated)	3227.000	3769.54	3	1257.52	3403.44	-0.0401887	-10.6614	2.4605e-07	93	0.0139	0.00146	365.1322	Hex(1)HexNAc(1)	P02671_STSYGTGSETESPRNPSSAGSWNSGSSGPGSTGNR_Hex(1)HexNAc(1)	File25305 Spectrum9824 scans: 14835
P05155	SNPNATSSSSQDPESLQDRGEGK	N4(Deamidated)	2436.000	3047.29	3	1016.77	2391.04	0.0225519	7.40064	8.5485e-06	93	0.01314	0.00146	656.2276	Hex(1)HexNAc(1)Neu5Ac(1)	P05155_SNPNATSSSSQDPESLQDRGEGK_Hex(1)HexNAc(1)Neu5Ac(1)	File25305 Spectrum5289 scans: 10068
Q14624	MVVTKPDDQEQSQVAEKPMEGESR		2617.000	2921.35	3	974.791	2717.26	0.0052574	1.79965	4.363e-06	93	0.01152	0.00146	203.0794	HexNAc(1)	Q14624_MVVTKPDDQEQSQVAEKPMEGESR_HexNAc(1)	File25305 Spectrum6319 scans: 11150
Q14624	RVMNMKIEETTMTTQTPAPIQAPSAILPLPGQSVER	N4(Deamidated);Q15(Deamidated);Q21(Deamidated)	4983.000	4798.21	3	1600.41	3937.98	-0.0790094	-16.4664	1.2247e-06	92	0.02965	0.00146	859.3070	Hex(1)HexNAc(2)Neu5Ac(1)	Q14624_RVMNMKIEETTMTTQTPAPIQAPSAILPLPGQSVER_Hex(1)HexNAc(2)Neu5Ac(1)	File25305 Spectrum19475 scans: 25067
P02671	GGSTSYGTGSETESPRNPSSAGSWNSGSSGPGSTGNR	N17(Deamidated);N25(Deamidated)	2511.000	3925.69	3	1309.57	3518.47	0.0602683	15.3523	0.00015596	92	0.06385	0.00146	406.1587	HexNAc(2)	P02671_GGSTSYGTGSETESPRNPSSAGSWNSGSSGPGSTGNR_HexNAc(2)	File25305 Spectrum5716 scans: 10517
P13671	MSPEEDCSHHSEDLCVFDTDSNDYFTSPACK	M1(Oxidation);C7(Carbamidomethyl);C15(Carbamidomethyl);C30(Carbamidomethyl)	4369.000	4643.76	4	1161.95	3695.41	0.0261331	5.62757	0.0018864	92	0.04888	0.00146	947.3230	Hex(1)HexNAc(1)Neu5Ac(2)	P13671_MSPEEDCSHHSEDLCVFDTDSNDYFTSPACK_Hex(1)HexNAc(1)Neu5Ac(2)	File25305 Spectrum16143 scans: 21472
P02790	PLPPTSAHGNVAEGETKPDPDVTER	N10(Deamidated)	2814.000	3109.46	3	1037.49	2614.25	0.0338127	10.8741	3.3117e-06	92	0.01772	0.00146	494.1748	HexNAc(1)Neu5Ac(1)	P02790_PLPPTSAHGNVAEGETKPDPDVTER_HexNAc(1)Neu5Ac(1)	File25305 Spectrum7461 scans: 12354
P00748	GTCVNMPSGPHCLCPQHLTGNHCQK	C3(Carbamidomethyl);C12(Carbamidomethyl);C14(Carbamidomethyl);C23(Carbamidomethyl)	3042.000	3092.32	4	774.087	2889.23	0.00253321	0.819194	1.352e-08	91	0.00259	0.00146	203.0794	HexNAc(1)	P00748_GTCVNMPSGPHCLCPQHLTGNHCQK_HexNAc(1)	File25305 Spectrum8783 scans: 13742
Q9UM47	TGSHCEQEVDPCLAQPCQHGGTCR	C5(Carbamidomethyl);C12(Carbamidomethyl);C17(Carbamidomethyl);C23(Carbamidomethyl)	2571.000	3295.32	4	824.838	2783.13	0.00387521	1.17597	3.1034e-05	91	0.04844	0.00146	511.1901	Fuc(1)Hex(1)HexNAc(1)	Q9UM47_TGSHCEQEVDPCLAQPCQHGGTCR_Fuc(1)Hex(1)HexNAc(1)	File25305 Spectrum6062 scans: 10880
P07996	ACPPGYSGNGIQCTDVDECKEVPDACFNHNGEHR	C2(Carbamidomethyl);C13(Carbamidomethyl);C19(Carbamidomethyl);C26(Carbamidomethyl)	3758.000	4092.62	4	1024.16	3889.59	-0.056245	-13.7431	5.7372e-06	91	0.03598	0.00146	203.0794	HexNAc(1)	P07996_ACPPGYSGNGIQCTDVDECKEVPDACFNHNGEHR_HexNAc(1)	File25305 Spectrum12760 scans: 17918
P10643	ENPLTQAVPK		3378.000	2042.92	2	1022.47	1095.59	0.000623319	0.305112	2.0743e-05	90	0.04734	0.00146	947.3230	Hex(1)HexNAc(1)Neu5Ac(2)	P10643_ENPLTQAVPK_Hex(1)HexNAc(1)Neu5Ac(2)	File25305 Spectrum10655 scans: 15708
P12259	KFTVNNLAEPQKAPSHQQATTAGSPLR		3343.000	3401.66	3	1134.89	2890.5	-0.0369823	-10.8719	1.156e-05	90	0.0461	0.00146	511.1901	Fuc(1)Hex(1)HexNAc(1)	P12259_KFTVNNLAEPQKAPSHQQATTAGSPLR_Fuc(1)Hex(1)HexNAc(1)	File25305 Spectrum10463 scans: 15506
P02751	MVQPQSPVAVSQSKPGCYDNGKHYQINQQWER	Q3(Deamidated);Q5(Deamidated);C17(Carbamidomethyl);N20(Deamidated)	3458.000	4256.98	5	852.403	3761.72	0.0817055	19.1933	2.0084e-06	89	0.0296	0.00146	494.1748	HexNAc(1)Neu5Ac(1)	P02751_MVQPQSPVAVSQSKPGCYDNGKHYQINQQWER_HexNAc(1)Neu5Ac(1)	File25305 Spectrum11100 scans: 16175
P01871	ESHPNATFSAVGEASICEDDWNSGER	C17(Carbamidomethyl)	4242.000	3521.48	4	881.378	2864.19	0.0568464	16.1428	9.1636e-05	89	0.08279	0.00146	656.2276	Hex(1)HexNAc(1)Neu5Ac(1)	P01871_ESHPNATFSAVGEASICEDDWNSGER_Hex(1)HexNAc(1)Neu5Ac(1)	File25305 Spectrum15439 scans: 20731
P08697	DLRGISEQSLVVSGVQHQSTLELSEVGVEAAAATSIAMSR		4893.000	4985.39	4	1247.36	4125.1	-0.0173756	-3.4853	0.0010449	89	0.1052	0.00146	859.3070	Hex(1)HexNAc(2)Neu5Ac(1)	P08697_DLRGISEQSLVVSGVQHQSTLELSEVGVEAAAATSIAMSR_Hex(1)HexNAc(2)Neu5Ac(1)	File25305 Spectrum18990 scans: 24540
P02679	KFEGNCAEQDGSGWWMNK	C6(Carbamidomethyl);M16(Oxidation)	4104.000	3106.21	3	1036.41	2158.88	0.00299736	0.964958	1.5711e-05	89	0.02119	0.00146	947.3230	Hex(1)HexNAc(1)Neu5Ac(2)	P02679_KFEGNCAEQDGSGWWMNK_Hex(1)HexNAc(1)Neu5Ac(2)	File25305 Spectrum14671 scans: 19925
P02768	LVNEVTEFAKTCVADESAENCDK	C12(Carbamidomethyl);C21(Carbamidomethyl)	1997.000	2993.27	4	749.325	2628.17	-0.0288531	-9.63931	1.0592e-06	89	0.08543	0.00146	365.1322	Hex(1)HexNAc(1)	P02768_LVNEVTEFAKTCVADESAENCDK_Hex(1)HexNAc(1)	File25305 Spectrum2816 scans: 7472
P05155	SSNPNATSSSSQDPESLQDRGEGK	N5(Deamidated)	2305.000	2973.21	3	992.078	2478.07	-0.0400452	-13.4687	2.3065e-06	88	0.03355	0.00146	494.1748	HexNAc(1)Neu5Ac(1)	P05155_SSNPNATSSSSQDPESLQDRGEGK_HexNAc(1)Neu5Ac(1)	File25305 Spectrum4544 scans: 9286
P02675	REEAPSLRPAPPPISGGGYR		3503.000	2762.33	4	691.59	2106.1	0.00465862	1.68648	4.6248e-07	88	0.01991	0.00146	656.2276	Hex(1)HexNAc(1)Neu5Ac(1)	P02675_REEAPSLRPAPPPISGGGYR_Hex(1)HexNAc(1)Neu5Ac(1)	File25305 Spectrum11345 scans: 16432
P02768	VHTECCHGDLLECADDRADLAKYICENQDSISSK	C5(Carbamidomethyl);C6(Carbamidomethyl);C13(Carbamidomethyl);C25(Carbamidomethyl)	4324.000	4211.78	4	1053.95	4008.73	-0.0291552	-6.9223	3.3968e-06	87	0.02562	0.00146	203.0794	HexNAc(1)	P02768_VHTECCHGDLLECADDRADLAKYICENQDSISSK_HexNAc(1)	File25305 Spectrum15891 scans: 21207
P02768	HGDLLECADDRADLAKYICENQDSISSK	C7(Carbamidomethyl);C19(Carbamidomethyl);N21(Deamidated)	4105.000	4171.79	6	696.306	3223.44	0.0261015	6.25665	4.8636e-07	87	0.002561	0.00146	947.3230	Hex(1)HexNAc(1)Neu5Ac(2)	P02768_HGDLLECADDRADLAKYICENQDSISSK_Hex(1)HexNAc(1)Neu5Ac(2)	File25305 Spectrum14676 scans: 19930
P00734	RQECSIPVCGQDQVTVAMTPR	C4(Carbamidomethyl);C9(Carbamidomethyl)	3758.000	3087.37	3	1030.13	2431.14	0.00443758	1.43733	0.00016064	87	0.04587	0.00146	656.2276	Hex(1)HexNAc(1)Neu5Ac(1)	P00734_RQECSIPVCGQDQVTVAMTPR_Hex(1)HexNAc(1)Neu5Ac(1)	File25305 Spectrum12761 scans: 17919
P08709	THKDDQLICVNENGGCEQYCSDHTGTKR	C9(Carbamidomethyl);C16(Carbamidomethyl);C20(Carbamidomethyl)	2703.000	3727.53	5	746.514	3321.42	-0.0473035	-12.6903	2.8894e-05	86	0.1329	0.002698	406.1587	HexNAc(2)	P08709_THKDDQLICVNENGGCEQYCSDHTGTKR_HexNAc(2)	File25305 Spectrum6810 scans: 11670
P49747	PTVPNSAQEDSDHDGQGDACDDDDDNDGVPDSR	C20(Carbamidomethyl)	2889.000	3920.46	4	981.122	3514.32	-0.0193204	-4.92809	0.00034431	86	0.05498	0.00146	406.1587	HexNAc(2)	P49747_PTVPNSAQEDSDHDGQGDACDDDDDNDGVPDSR_HexNAc(2)	File25305 Spectrum7899 scans: 12814
P01860	TCVVVDVSHEDPEVQFKWYVDGVEVHNAK	C2(Carbamidomethyl)	4826.000	3791.78	3	1264.93	3384.61	0.0107106	2.82469	3.8591e-05	86	0.03076	0.00146	406.1587	HexNAc(2)	P01860_TCVVVDVSHEDPEVQFKWYVDGVEVHNAK_HexNAc(2)	File25305 Spectrum18632 scans: 24144
Q9UGM5	FVSVTCDFFESQAPATGSENSAVNQKPTNLPKVEESQQK	C6(Carbamidomethyl);N20(Deamidated);Q25(Deamidated)	4259.000	4665.19	4	1167.3	4300.01	0.0433172	9.28519	0.00032628	86	0.05351	0.00146	365.1322	Hex(1)HexNAc(1)	Q9UGM5_FVSVTCDFFESQAPATGSENSAVNQKPTNLPKVEESQQK_Hex(1)HexNAc(1)	File25305 Spectrum15533 scans: 20830
P01834	WKVDNALQSGNSQESVTEQDSK	N5(Deamidated);Q8(Deamidated)	2627.000	3311.43	3	1104.82	2451.1	0.0143457	4.33216	2.7537e-05	85	0.02545	0.00146	859.3070	Hex(1)HexNAc(2)Neu5Ac(1)	P01834_WKVDNALQSGNSQESVTEQDSK_Hex(1)HexNAc(2)Neu5Ac(1)	File25305 Spectrum6376 scans: 11210
P02768	CCHGDLLECADDRADLAKYICENQDSISSK	C1(Carbamidomethyl);C2(Carbamidomethyl);C9(Carbamidomethyl);C21(Carbamidomethyl);N23(Deamidated)	4329.000	4054.75	4	1014.69	3543.5	0.0557266	13.7435	7.2838e-05	85	0.2824	0.004871	511.1901	Fuc(1)Hex(1)HexNAc(1)	P02768_CCHGDLLECADDRADLAKYICENQDSISSK_Fuc(1)Hex(1)HexNAc(1)	File25305 Spectrum15919 scans: 21236
P17936	SAGSVESPSVSSTHR		2269.000	2142.93	3	715.318	1486.7	0.0033716	1.57336	0.00064232	85	0.05367	0.00146	656.2276	Hex(1)HexNAc(1)Neu5Ac(1)	P17936_SAGSVESPSVSSTHR_Hex(1)HexNAc(1)Neu5Ac(1)	File25305 Spectrum4336 scans: 9068
P01871	NNSDISSTR	N1(Deamidated)	1620.000	2818.12	3	940.38	993.436	0.0324849	11.5272	0.0019121	85	0.3013	0.008344	1823.6453	Fuc(1)Hex(3)HexNAc(3)Neu5Ac(2)	P01871_NNSDISSTR_Fuc(1)Hex(3)HexNAc(3)Neu5Ac(2)	File25305 Spectrum676 scans: 5225
P02671	PGSTGTWNPGSSER		2907.000	2087.87	2	1044.94	1431.64	0.00117662	0.563552	0.0014523	85	0.1374	0.002698	656.2276	Hex(1)HexNAc(1)Neu5Ac(1)	P02671_PGSTGTWNPGSSER_Hex(1)HexNAc(1)Neu5Ac(1)	File25305 Spectrum8000 scans: 12920
P05155	PNATSSSSQDPESLQDRGEGK	N2(Deamidated)	2231.000	2702.14	3	901.721	2189.97	-0.0205608	-7.6091	1.3443e-05	84	0.02457	0.00146	511.1901	Fuc(1)Hex(1)HexNAc(1)	P05155_PNATSSSSQDPESLQDRGEGK_Fuc(1)Hex(1)HexNAc(1)	File25305 Spectrum4129 scans: 8850
Q13790	DANISQPETTK		2356.000	1858.81	2	930.412	1202.58	0.00375113	2.01803	9.0861e-05	84	0.0331	0.00146	656.2276	Hex(1)HexNAc(1)Neu5Ac(1)	Q13790_DANISQPETTK_Hex(1)HexNAc(1)Neu5Ac(1)	File25305 Spectrum4836 scans: 9593
P01859::P01861	NVDHKPSNTK	N1(Deamidated)	1801.000	1998.88	3	667.3	1139.56	0.0134697	6.73864	0.0013673	83	0.07534	0.00146	859.3070	Hex(1)HexNAc(2)Neu5Ac(1)	P01859::P01861_NVDHKPSNTK_Hex(1)HexNAc(2)Neu5Ac(1)	File25305 Spectrum1699 scans: 6299
Q92954	KKPTPKPPVVDEAGSGLDNGDFK		3173.000	3051.47	4	763.874	2395.24	-0.00064552	-0.211544	1.5191e-05	83	0.02311	0.00146	656.2276	Hex(1)HexNAc(1)Neu5Ac(1)	Q92954_KKPTPKPPVVDEAGSGLDNGDFK_Hex(1)HexNAc(1)Neu5Ac(1)	File25305 Spectrum9525 scans: 14521
P19827	LSALQPSPTHSSSNTQR		2648.000	2305.08	3	769.367	1809.9	0.00366324	1.5892	2.4547e-05	83	0.02439	0.00146	494.1748	HexNAc(1)Neu5Ac(1)	P19827_LSALQPSPTHSSSNTQR_HexNAc(1)Neu5Ac(1)	File25305 Spectrum6491 scans: 11330
P01860::P01857	NVNHKPSNTK	N1(Deamidated);N3(Deamidated)	1801.000	1998.88	3	667.3	1139.56	0.0134697	6.73864	0.0013673	83	0.07534	0.00146	859.3070	Hex(1)HexNAc(2)Neu5Ac(1)	P01860::P01857_NVNHKPSNTK_Hex(1)HexNAc(2)Neu5Ac(1)	File25305 Spectrum1699 scans: 6299
P05155	NATSSSSQDPESLQDR	N1(Deamidated)	2651.000	2377.96	3	793.66	1721.73	-0.00194473	-0.817816	0.0016517	82	0.06569	0.00146	656.2276	Hex(1)HexNAc(1)Neu5Ac(1)	P05155_NATSSSSQDPESLQDR_Hex(1)HexNAc(1)Neu5Ac(1)	File25305 Spectrum6511 scans: 11351
P02768	CCHGDLLECADDRADLAKYICENQDSISSK	C1(Carbamidomethyl);C2(Carbamidomethyl);C9(Carbamidomethyl);C21(Carbamidomethyl)	4182.000	4199.81	5	840.968	3542.52	0.0575971	13.7142	8.9659e-06	82	0.1189	0.002698	656.2276	Hex(1)HexNAc(1)Neu5Ac(1)	P02768_CCHGDLLECADDRADLAKYICENQDSISSK_Hex(1)HexNAc(1)Neu5Ac(1)	File25305 Spectrum15105 scans: 20380
P19827	SALQPSPTHSSSNTQR		2181.000	2644.15	3	882.389	1696.81	0.00929587	3.51564	0.00073449	81	0.03845	0.00146	947.3230	Hex(1)HexNAc(1)Neu5Ac(2)	P19827_SALQPSPTHSSSNTQR_Hex(1)HexNAc(1)Neu5Ac(2)	File25305 Spectrum3845 scans: 8552
P02647	ATEHLSTLSEK		2540.000	1870.84	3	624.621	1214.61	0.000489166	0.261468	0.017451	80	0.1303	0.002698	656.2276	Hex(1)HexNAc(1)Neu5Ac(1)	P02647_ATEHLSTLSEK_Hex(1)HexNAc(1)Neu5Ac(1)	File25305 Spectrum5883 scans: 10692
P02649	QRQWAGLVEKVQAAVGTSAAPVPSDNH	Q1(Deamidated);Q3(Deamidated);Q12(Deamidated)	2854.000	3312.6	5	663.526	2818.39	0.0317319	9.57916	2.47e-06	80	0.01766	0.00146	494.1748	HexNAc(1)Neu5Ac(1)	P02649_QRQWAGLVEKVQAAVGTSAAPVPSDNH_HexNAc(1)Neu5Ac(1)	File25305 Spectrum7701 scans: 12606
P04196	GPPLPQGPPPLLPMSCSSCQHATFGTNGAQR	C16(Carbamidomethyl);C19(Carbamidomethyl);N27(Deamidated)	4163.000	3755.71	5	752.15	3260.52	0.018427	4.9064	6.8585e-07	80	0.02155	0.00146	494.1748	HexNAc(1)Neu5Ac(1)	P04196_GPPLPQGPPPLLPMSCSSCQHATFGTNGAQR_HexNAc(1)Neu5Ac(1)	File25305 Spectrum15001 scans: 20271
P00748	TPPQSQTPGALPAKR		2596.000	2204.08	3	735.699	1547.84	0.00618063	2.80418	0.0023612	80	0.09945	0.00146	656.2276	Hex(1)HexNAc(1)Neu5Ac(1)	P00748_TPPQSQTPGALPAKR_Hex(1)HexNAc(1)Neu5Ac(1)	File25305 Spectrum6201 scans: 11026
P09871	DSCKGDSGGAFAVQDPNDKTK	C3(Carbamidomethyl);N17(Deamidated)	2526.000	2401.03	4	601.265	2196.96	-0.0111151	-4.62932	0.00041209	79	0.03243	0.00146	203.0794	HexNAc(1)	P09871_DSCKGDSGGAFAVQDPNDKTK_HexNAc(1)	File25305 Spectrum5804 scans: 10609
P08519	SVLATLTVVPDPSTEASSEEAPTEQSPGVQDCYHGDGQSYR	Q25(Deamidated);C32(Carbamidomethyl)	4613.000	4876.12	4	1220.04	4364.95	-0.0235048	-4.8204	0.023955	79	0.1383	0.002698	511.1901	Fuc(1)Hex(1)HexNAc(1)	P08519_SVLATLTVVPDPSTEASSEEAPTEQSPGVQDCYHGDGQSYR_Fuc(1)Hex(1)HexNAc(1)	File25305 Spectrum17484 scans: 22880
P01860	SCDTPPPCPR	C2(Carbamidomethyl);C8(Carbamidomethyl)	2294.000	1841.72	2	921.868	1185.49	0.00256947	1.39515	0.0061658	78	0.1111	0.00146	656.2276	Hex(1)HexNAc(1)Neu5Ac(1)	P01860_SCDTPPPCPR_Hex(1)HexNAc(1)Neu5Ac(1)	File25305 Spectrum4472 scans: 9211
P02671	SYGTGSETESPRNPSSAGSWNSGSSGPGSTGNR	N21(Deamidated)	3238.000	3580.55	3	1194.52	3215.36	0.0552869	15.4409	0.0001312	78	0.02954	0.00146	365.1322	Hex(1)HexNAc(1)	P02671_SYGTGSETESPRNPSSAGSWNSGSSGPGSTGNR_Hex(1)HexNAc(1)	File25305 Spectrum9884 scans: 14898
P02671	TSYGTGSETESPRNPSSAGSWNSGSSGPGSTGNR		2962.000	3518.47	4	880.624	3315.43	-0.0397525	-11.2982	0.00011245	78	0.04004	0.00146	203.0794	HexNAc(1)	P02671_TSYGTGSETESPRNPSSAGSWNSGSSGPGSTGNR_HexNAc(1)	File25305 Spectrum8325 scans: 13261
P07996	STSCGNGIQQR	C4(Carbamidomethyl);N6(Deamidated)	1919.000	1863.75	3	622.256	1207.53	-0.00687826	-3.69056	0.007869	77	0.07852	0.00146	656.2276	Hex(1)HexNAc(1)Neu5Ac(1)	P07996_STSCGNGIQQR_Hex(1)HexNAc(1)Neu5Ac(1)	File25305 Spectrum2366 scans: 6999
P02790	LPPTSAHGNVAEGETKPDPDVTER		2566.000	2881.36	4	721.347	2516.21	0.0123843	4.29809	0.000835	77	0.06987	0.00146	365.1322	Hex(1)HexNAc(1)	P02790_LPPTSAHGNVAEGETKPDPDVTER_Hex(1)HexNAc(1)	File25305 Spectrum6035 scans: 10852
P00747	CTTPPPSSGPTYQCLK	C1(Carbamidomethyl);C14(Carbamidomethyl)	4012.000	2449.04	3	817.356	1792.81	0.00496486	2.02727	0.0071256	77	0.1734	0.003723	656.2276	Hex(1)HexNAc(1)Neu5Ac(1)	P00747_CTTPPPSSGPTYQCLK_Hex(1)HexNAc(1)Neu5Ac(1)	File25305 Spectrum14159 scans: 19387
P02671	GPGSTGSWNSGSSGTGSTGNQNPGSPRPGSTGTWNPGSSER	N9(Deamidated)	3289.000	4108.79	3	1370.6	3904.69	0.0173961	4.23388	3.2827e-05	76	0.01187	0.00146	203.0794	HexNAc(1)	P02671_GPGSTGSWNSGSSGTGSTGNQNPGSPRPGSTGTWNPGSSER_HexNAc(1)	File25305 Spectrum10162 scans: 15190
B9A064	CQVTHEGSTVEK	C1(Carbamidomethyl)	2325.000	1738.75	2	870.385	1373.62	-0.0020815	-1.19712	1.0366e-05	76	0.03422	0.00146	365.1322	Hex(1)HexNAc(1)	B9A064_CQVTHEGSTVEK_Hex(1)HexNAc(1)	File25305 Spectrum4659 scans: 9407
P01860::P01857	CNVNHKPSNTK	C1(Carbamidomethyl);N4(Deamidated)	1624.000	1663.76	3	555.595	1298.6	0.0272371	16.3708	8.5086e-05	76	0.09115	0.00146	365.1322	Hex(1)HexNAc(1)	P01860::P01857_CNVNHKPSNTK_Hex(1)HexNAc(1)	File25305 Spectrum696 scans: 5246
P01023	DASDCHGEDSQAFCEK	C5(Carbamidomethyl);C14(Carbamidomethyl)	2347.000	2260.87	3	754.63	1854.68	0.0315795	13.9679	1.1032e-05	76	0.09051	0.00146	406.1587	HexNAc(2)	P01023_DASDCHGEDSQAFCEK_HexNAc(2)	File25305 Spectrum4781 scans: 9535
P01859::P01861	CNVDHKPSNTK	C1(Carbamidomethyl)	1624.000	1663.76	3	555.595	1298.6	0.0272371	16.3708	8.5086e-05	76	0.09115	0.00146	365.1322	Hex(1)HexNAc(1)	P01859::P01861_CNVDHKPSNTK_Hex(1)HexNAc(1)	File25305 Spectrum696 scans: 5246
P01860	VPSSSLGTQTYTCNVNHKPSNTKVDK	Q9(Deamidated);C13(Carbamidomethyl);N16(Deamidated);N21(Deamidated)	1565.000	4689.06	8	587.14	2864.35	0.0606026	12.9243	0.00017654	75	0.06317	0.00146	1823.6453	Fuc(1)Hex(3)HexNAc(3)Neu5Ac(2)	P01860_VPSSSLGTQTYTCNVNHKPSNTKVDK_Fuc(1)Hex(3)HexNAc(3)Neu5Ac(2)	File25305 Spectrum349 scans: 4881
P02751	RTTPPTTATPIR		2680.000	1966.96	3	656.659	1310.73	-0.00157798	-0.802244	0.00036431	75	0.06161	0.00146	656.2276	Hex(1)HexNAc(1)Neu5Ac(1)	P02751_RTTPPTTATPIR_Hex(1)HexNAc(1)Neu5Ac(1)	File25305 Spectrum6683 scans: 11537
Q86VH4	FKGNKESTMICAGPK	M9(Oxidation);C11(Carbamidomethyl)	3613.000	2195	3	732.674	1682.81	-0.00420982	-1.91791	0.016295	75	0.2017	0.003723	511.1901	Fuc(1)Hex(1)HexNAc(1)	Q86VH4_FKGNKESTMICAGPK_Fuc(1)Hex(1)HexNAc(1)	File25305 Spectrum11953 scans: 17071
P02671	SYGTGSETESPRNPSSAGSWNSGSSGPGSTGNR		2716.000	3621.52	4	906.387	3214.38	-0.0206426	-5.69999	0.00034113	75	0.09733	0.00146	406.1587	HexNAc(2)	P02671_SYGTGSETESPRNPSSAGSWNSGSSGPGSTGNR_HexNAc(2)	File25305 Spectrum6885 scans: 11749
P00742	GDQCETSPCQNQGK	C4(Carbamidomethyl);C9(Carbamidomethyl)	1670.000	2013.81	2	1007.91	1607.63	0.0237284	11.7828	0.0028123	74	0.18	0.003723	406.1587	HexNAc(2)	P00742_GDQCETSPCQNQGK_HexNAc(2)	File25305 Spectrum964 scans: 5527
P02671	ESSSHHPGIAEFPSR		2978.000	2292.99	2	1147.5	1636.76	0.00426449	1.85979	0.013597	74	0.1351	0.002698	656.2276	Hex(1)HexNAc(1)Neu5Ac(1)	P02671_ESSSHHPGIAEFPSR_Hex(1)HexNAc(1)Neu5Ac(1)	File25305 Spectrum8420 scans: 13361
Q9H2U1	PRSSGGGYGGGPAGGHGGNRGSGGGGGGGGGGR	N19(Deamidated)	2896.000	3572.41	4	894.11	2625.15	-0.0642523	-17.9857	0.015541	74	0.1745	0.003723	947.3230	Hex(1)HexNAc(1)Neu5Ac(2)	Q9H2U1_PRSSGGGYGGGPAGGHGGNRGSGGGGGGGGGGR_Hex(1)HexNAc(1)Neu5Ac(2)	File25305 Spectrum7939 scans: 12856
P01009	EDPQGDAAQKTDTSHHDQDHPTFNK		1973.000	3474.46	4	869.622	2818.22	0.0146025	4.2028	0.0021525	74	0.0582	0.00146	656.2276	Hex(1)HexNAc(1)Neu5Ac(1)	P01009_EDPQGDAAQKTDTSHHDQDHPTFNK_Hex(1)HexNAc(1)Neu5Ac(1)	File25305 Spectrum2677 scans: 7326
P05155	NATSSSSQDPESLQDRGEGK	N1(Deamidated);Q8(Deamidated)	2625.000	3042.21	3	1015.08	2093.9	-0.0158126	-5.19773	0.0068591	73	0.1827	0.003723	947.3230	Hex(1)HexNAc(1)Neu5Ac(2)	P05155_NATSSSSQDPESLQDRGEGK_Hex(1)HexNAc(1)Neu5Ac(2)	File25305 Spectrum6367 scans: 11200
P02790	CWSLAIATPLPPTSAHGNVAEGETKPDPDVTER	C1(Carbamidomethyl);N18(Deamidated)	3037.000	4172.84	4	1044.22	3516.68	-0.0682188	-16.3483	0.0047274	73	0.1691	0.002698	656.2276	Hex(1)HexNAc(1)Neu5Ac(1)	P02790_CWSLAIATPLPPTSAHGNVAEGETKPDPDVTER_Hex(1)HexNAc(1)Neu5Ac(1)	File25305 Spectrum8756 scans: 13714
P02671	GGSTSYGTGSETESPRNPS		2371.000	2526.02	3	843.013	1869.8	-0.00930763	-3.68471	9.2363e-05	72	0.1306	0.002698	656.2276	Hex(1)HexNAc(1)Neu5Ac(1)	P02671_GGSTSYGTGSETESPRNPS_Hex(1)HexNAc(1)Neu5Ac(1)	File25305 Spectrum4920 scans: 9681
P00748	GGTCVNMPSGPHCLCPQHLTGNHCQK	C4(Carbamidomethyl);C13(Carbamidomethyl);C15(Carbamidomethyl);N22(Deamidated);C24(Carbamidomethyl)	2416.000	3150.33	4	788.59	2947.24	0.00945388	3.00092	1.9312e-05	72	0.07685	0.00146	203.0794	HexNAc(1)	P00748_GGTCVNMPSGPHCLCPQHLTGNHCQK_HexNAc(1)	File25305 Spectrum5178 scans: 9952
Q9UGM5	NTPPTDSPSK		1779.000	1698.72	2	850.369	1042.49	0.00214342	1.26178	0.0040857	72	0.1281	0.002698	656.2276	Hex(1)HexNAc(1)Neu5Ac(1)	Q9UGM5_NTPPTDSPSK_Hex(1)HexNAc(1)Neu5Ac(1)	File25305 Spectrum1573 scans: 6167
P02679	KDTVQIHDITGKDCQDIANK	Q5(Deamidated);C14(Carbamidomethyl)	3069.000	4123.76	5	825.76	2299.11	0.00452443	1.09716	0.029416	72	0.2625	0.004871	1823.6453	Fuc(1)Hex(3)HexNAc(3)Neu5Ac(2)	P02679_KDTVQIHDITGKDCQDIANK_Fuc(1)Hex(3)HexNAc(3)Neu5Ac(2)	File25305 Spectrum8936 scans: 13903
P01042	SSRIGEIKEETTVSPPHTSMAPAQDEER		3101.000	4028.76	3	1343.93	3081.47	-0.0326358	-8.10072	0.003974	71	0.2331	0.003723	947.3230	Hex(1)HexNAc(1)Neu5Ac(2)	P01042_SSRIGEIKEETTVSPPHTSMAPAQDEER_Hex(1)HexNAc(1)Neu5Ac(2)	File25305 Spectrum9119 scans: 14095
P10643	GQPCVGNAFETQSCEPTRGCPTEEGCGER	C4(Carbamidomethyl);C14(Carbamidomethyl);C20(Carbamidomethyl);C26(Carbamidomethyl)	3378.000	3676.5	3	1226.51	3269.32	0.0115584	3.14386	0.0061306	71	0.07463	0.00146	406.1587	HexNAc(2)	P10643_GQPCVGNAFETQSCEPTRGCPTEEGCGER_HexNAc(2)	File25305 Spectrum10657 scans: 15710
P05155	SNPNATSSSSQDPESLQDRGEGK	N2(Deamidated);N4(Deamidated)	2446.000	2904.23	3	969.085	2392.03	0.0145677	5.01601	0.00030131	71	0.07647	0.00146	511.1901	Fuc(1)Hex(1)HexNAc(1)	P05155_SNPNATSSSSQDPESLQDRGEGK_Fuc(1)Hex(1)HexNAc(1)	File25305 Spectrum5345 scans: 10127
P01861	TVPSSSLGTKTYTCNVDHKPSNTK	C14(Carbamidomethyl)	3936.000	3278.53	5	656.712	2621.28	0.0191192	5.83164	0.00038396	70	0.07747	0.00146	656.2276	Hex(1)HexNAc(1)Neu5Ac(1)	P01861_TVPSSSLGTKTYTCNVDHKPSNTK_Hex(1)HexNAc(1)Neu5Ac(1)	File25305 Spectrum13738 scans: 18945
P01860	TVPSSSLGTQTYTCNVNHKPSNTK	C14(Carbamidomethyl);N17(Deamidated)	3936.000	3278.53	5	656.712	2621.24	0.0555047	16.9298	0.00038396	70	0.1031	0.00146	656.2276	Hex(1)HexNAc(1)Neu5Ac(1)	P01860_TVPSSSLGTQTYTCNVNHKPSNTK_Hex(1)HexNAc(1)Neu5Ac(1)	File25305 Spectrum13738 scans: 18945
Q9BWX5	SPSGPGSGGSAGGR		2607.000	2077.87	3	693.631	1129.51	0.0334886	16.1168	0.038543	70	0.2809	0.004871	947.3230	Hex(1)HexNAc(1)Neu5Ac(2)	Q9BWX5_SPSGPGSGGSAGGR_Hex(1)HexNAc(1)Neu5Ac(2)	File25305 Spectrum6265 scans: 11093
P02671	EITRGGSTSYGTGSETESPRNPSSAGSWNSGSSGPGSTGNR		2995.000	4218.77	4	1055.7	4015.78	-0.082155	-19.4737	0.0011614	70	0.2804	0.004871	203.0794	HexNAc(1)	P02671_EITRGGSTSYGTGSETESPRNPSSAGSWNSGSSGPGSTGNR_HexNAc(1)	File25305 Spectrum8516 scans: 13462
P02790	TSAHGNVAEGETKPDPDVTER		2829.000	4032.73	3	1345.25	2209.02	0.0617525	15.3128	0.00070169	70	0.1446	0.002698	1823.6453	Fuc(1)Hex(3)HexNAc(3)Neu5Ac(2)	P02790_TSAHGNVAEGETKPDPDVTER_Fuc(1)Hex(3)HexNAc(3)Neu5Ac(2)	File25305 Spectrum7550 scans: 12447
P02675	KREEAPSLRPAPPPISGGGYR		3211.000	2890.43	4	723.614	2234.19	0.0064956	2.24728	0.00016747	69	0.04566	0.00146	656.2276	Hex(1)HexNAc(1)Neu5Ac(1)	P02675_KREEAPSLRPAPPPISGGGYR_Hex(1)HexNAc(1)Neu5Ac(1)	File25305 Spectrum9735 scans: 14742
P01857	QTYICNVNHKPSNTK	C5(Carbamidomethyl);N8(Deamidated)	1813.000	2006.91	3	669.978	1803.86	-0.0246115	-12.2634	0.00016656	69	0.05122	0.00146	203.0794	HexNAc(1)	P01857_QTYICNVNHKPSNTK_HexNAc(1)	File25305 Spectrum1766 scans: 6369
P02675	KREEAPSLRPAPPPISGGGYR		2988.000	2599.32	4	650.838	2234.19	0.000695597	0.267607	5.1635e-05	68	0.1149	0.00146	365.1322	Hex(1)HexNAc(1)	P02675_KREEAPSLRPAPPPISGGGYR_Hex(1)HexNAc(1)	File25305 Spectrum8475 scans: 13419
P46531	DGVATFTCLCRPGYTGHHCETNINECSSQPCR	C8(Carbamidomethyl);C10(Carbamidomethyl);C19(Carbamidomethyl);N22(Deamidated);C26(Carbamidomethyl);C31(Carbamidomethyl)	2378.000	3987.58	4	997.903	3784.55	-0.0522228	-13.0963	0.00012849	68	0.08567	0.00146	203.0794	HexNAc(1)	P46531_DGVATFTCLCRPGYTGHHCETNINECSSQPCR_HexNAc(1)	File25305 Spectrum4959 scans: 9722
P02671	ESSSHHPGIAEFPSR		3261.000	2584.09	4	647.03	1636.76	0.00731156	2.82945	0.053086	68	0.2147	0.003723	947.3230	Hex(1)HexNAc(1)Neu5Ac(2)	P02671_ESSSHHPGIAEFPSR_Hex(1)HexNAc(1)Neu5Ac(2)	File25305 Spectrum10011 scans: 15032
P12931	PAENVHGAGGGAFPASQTPSKPASADGHR	N4(Deamidated);Q17(Deamidated)	3122.000	3179.45	4	795.869	2772.29	-0.00105784	-0.332713	0.0055834	68	0.1016	0.00146	406.1587	HexNAc(2)	P12931_PAENVHGAGGGAFPASQTPSKPASADGHR_HexNAc(2)	File25305 Spectrum9237 scans: 14219
P01860	LSSVVTVPSSSLGTQTYTCNVNHKPSNTK	Q15(Deamidated);C19(Carbamidomethyl);N22(Deamidated)	4004.000	3311.59	4	828.904	3107.51	-0.00188313	-0.56865	0.030621	68	0.1494	0.002698	203.0794	HexNAc(1)	P01860_LSSVVTVPSSSLGTQTYTCNVNHKPSNTK_HexNAc(1)	File25305 Spectrum14112 scans: 19338
P02671	WNSGSSGTGSTGNQNPGSPRPGSTGTWNPGSSER		3275.000	4219.86	4	1055.97	3360.47	0.0838943	19.8808	0.04144	68	0.1447	0.002698	859.3070	Hex(1)HexNAc(2)Neu5Ac(1)	P02671_WNSGSSGTGSTGNQNPGSPRPGSTGTWNPGSSER_Hex(1)HexNAc(2)Neu5Ac(1)	File25305 Spectrum10086 scans: 15110
P01834	EAKVQWKVDNALQSGNSQESVTEQDSK		4399.000	3207.48	3	1070.17	3004.44	-0.0391159	-12.1952	0.0010507	68	0.2035	0.003723	203.0794	HexNAc(1)	P01834_EAKVQWKVDNALQSGNSQESVTEQDSK_HexNAc(1)	File25305 Spectrum16311 scans: 21648
P02671	PGSPRPGSTGTWNPGSSER		2782.000	2582.12	3	861.716	1925.9	-0.000630759	-0.244279	0.0037614	67	0.07522	0.00146	656.2276	Hex(1)HexNAc(1)Neu5Ac(1)	P02671_PGSPRPGSTGTWNPGSSER_Hex(1)HexNAc(1)Neu5Ac(1)	File25305 Spectrum7276 scans: 12160
P01009	DPQGDAAQKTDTSHHDQDHPTFNK	Q8(Deamidated)	1975.000	3096.37	5	620.282	2690.16	0.0566035	18.2806	0.00041951	67	0.2433	0.003723	406.1587	HexNAc(2)	P01009_DPQGDAAQKTDTSHHDQDHPTFNK_HexNAc(2)	File25305 Spectrum2691 scans: 7340
P01860	VVTVPSSSLGTQTYTCNVNHKPSNTK	Q12(Deamidated);C16(Carbamidomethyl);N19(Deamidated)	4076.000	3315.57	4	829.901	2820.36	0.0360377	10.8692	0.028607	67	0.2352	0.003723	494.1748	HexNAc(1)Neu5Ac(1)	P01860_VVTVPSSSLGTQTYTCNVNHKPSNTK_HexNAc(1)Neu5Ac(1)	File25305 Spectrum14513 scans: 19759
P02671	GSWNSGSSGTGSTGNQNPGSPRPGSTGTWNPGSSER		3148.000	4363.91	3	1455.64	3504.53	0.0750786	17.2044	0.0035366	67	0.1318	0.002698	859.3070	Hex(1)HexNAc(2)Neu5Ac(1)	P02671_GSWNSGSSGTGSTGNQNPGSPRPGSTGTWNPGSSER_Hex(1)HexNAc(2)Neu5Ac(1)	File25305 Spectrum9380 scans: 14369
P02751	RPGGEPSPEGTTGQSYNQY		3006.000	2680.12	3	894.38	2023.89	0.00490867	1.83151	0.00035601	66	0.1813	0.003723	656.2276	Hex(1)HexNAc(1)Neu5Ac(1)	P02751_RPGGEPSPEGTTGQSYNQY_Hex(1)HexNAc(1)Neu5Ac(1)	File25305 Spectrum8579 scans: 13528
P35579	QDREDQSILCTGESGAGKTENTK	C10(Carbamidomethyl)	2542.000	2929.29	4	733.33	2523.15	-0.0181292	-6.18892	0.0013534	66	0.1418	0.002698	406.1587	HexNAc(2)	P35579_QDREDQSILCTGESGAGKTENTK_HexNAc(2)	File25305 Spectrum5893 scans: 10703
P01860	SCDTPPPCPR	C2(Carbamidomethyl);C8(Carbamidomethyl)	2011.000	1550.62	3	517.882	1185.49	0.000993004	0.64039	0.017512	66	0.09003	0.00146	365.1322	Hex(1)HexNAc(1)	P01860_SCDTPPPCPR_Hex(1)HexNAc(1)	File25305 Spectrum2894 scans: 7554
O00305	RMRHSNHSTENSPIER	M2(Oxidation);N6(Deamidated);N11(Deamidated)	2588.000	2462.04	3	821.689	1967.89	-0.0173142	-7.03243	0.0041107	65	0.2207	0.003723	494.1748	HexNAc(1)Neu5Ac(1)	O00305_RMRHSNHSTENSPIER_HexNAc(1)Neu5Ac(1)	File25305 Spectrum6160 scans: 10983
P02671	ADEAGSEADHEGTHSTK		1573.000	1944.77	3	649.265	1740.72	-0.0265977	-13.6765	0.00039044	65	0.1977	0.003723	203.0794	HexNAc(1)	P02671_ADEAGSEADHEGTHSTK_HexNAc(1)	File25305 Spectrum400 scans: 4935
P02768	ECCEKPLLEKSHCIAEVENDEMPADLPSLAADFVESK	C2(Carbamidomethyl);C3(Carbamidomethyl);C13(Carbamidomethyl);N19(Deamidated);M22(Oxidation)	4587.000	4481.02	5	897.212	4276.92	0.0248216	5.53928	0.00023742	65	0.03759	0.00146	203.0794	HexNAc(1)	P02768_ECCEKPLLEKSHCIAEVENDEMPADLPSLAADFVESK_HexNAc(1)	File25305 Spectrum17340 scans: 22728
P01834	NALQSGNSQESVTEQDSK	N1(Deamidated);Q4(Deamidated);N7(Deamidated)	2694.000	2330.98	2	1166.5	1923.82	0.00493949	2.11906	0.0014231	65	0.1439	0.002698	406.1587	HexNAc(2)	P01834_NALQSGNSQESVTEQDSK_HexNAc(2)	File25305 Spectrum6761 scans: 11619
P01009	DPQGDAAQKTDTSHHDQDHPTFNK	Q8(Deamidated)	2203.000	2893.23	3	965.417	2690.16	-0.0107435	-3.71334	1.4166e-05	65	0.01343	0.00146	203.0794	HexNAc(1)	P01009_DPQGDAAQKTDTSHHDQDHPTFNK_HexNAc(1)	File25305 Spectrum3969 scans: 8682
Q14515	EKVHENENIGTTEPGEHQEAK		2103.000	3322.42	4	831.613	2375.1	0.00134846	0.405867	0.002556	64	0.08527	0.00146	947.3230	Hex(1)HexNAc(1)Neu5Ac(2)	Q14515_EKVHENENIGTTEPGEHQEAK_Hex(1)HexNAc(1)Neu5Ac(2)	File25305 Spectrum3406 scans: 8091
P02671	HRHPDEAAFFDTASTGK		2763.000	2251	3	751.34	1885.87	-0.00355336	-1.57857	0.019908	64	0.2058	0.003723	365.1322	Hex(1)HexNAc(1)	P02671_HRHPDEAAFFDTASTGK_Hex(1)HexNAc(1)	File25305 Spectrum7161 scans: 12039
P02671	MELERPGGNEITRGGSTSYGTGSETESPRN	N9(Deamidated);N30(Deamidated)	2182.000	3374.5	4	844.632	3170.41	0.0119971	3.55521	1.8004e-05	61	0.04771	0.00146	203.0794	HexNAc(1)	P02671_MELERPGGNEITRGGSTSYGTGSETESPRN_HexNAc(1)	File25305 Spectrum3851 scans: 8558
P01857	QTYICNVNHKPSNTKVDK	C5(Carbamidomethyl);N8(Deamidated)	2438.000	2640.22	4	661.063	2146.05	0.00239204	0.906	0.0036398	61	0.08018	0.00146	494.1748	HexNAc(1)Neu5Ac(1)	P01857_QTYICNVNHKPSNTKVDK_HexNAc(1)Neu5Ac(1)	File25305 Spectrum5302 scans: 10082
P42858	QNPKYITAACEMVAEMVESLQSVLALGHK	Q1(Deamidated);C10(Carbamidomethyl);Q21(Deamidated)	3815.000	3624.74	4	907.192	3218.57	0.0128366	3.54138	0.038351	60	0.2776	0.004871	406.1587	HexNAc(2)	P42858_QNPKYITAACEMVAEMVESLQSVLALGHK_HexNAc(2)	File25305 Spectrum13075 scans: 18249
P06681	GMWDGETAVCDNGAGHCPNPGISLGAVR	C10(Carbamidomethyl);C17(Carbamidomethyl)	4302.000	3553.52	3	1185.51	2897.26	0.0291406	8.20048	0.018879	59	0.09939	0.00146	656.2276	Hex(1)HexNAc(1)Neu5Ac(1)	P06681_GMWDGETAVCDNGAGHCPNPGISLGAVR_Hex(1)HexNAc(1)Neu5Ac(1)	File25305 Spectrum15771 scans: 21081
P01860	SVVTVPSSSLGTQTYTCNVNHKPSNTK	C17(Carbamidomethyl);N20(Deamidated)	4121.000	3313.57	4	829.4	2906.41	0.00132487	0.399832	0.025864	58	0.1674	0.002698	406.1587	HexNAc(2)	P01860_SVVTVPSSSLGTQTYTCNVNHKPSNTK_HexNAc(2)	File25305 Spectrum14766 scans: 20024
P01861	SVVTVPSSSLGTKTYTCNVDHKPSNTK	C17(Carbamidomethyl)	4121.000	3313.57	4	829.4	2906.44	-0.0350606	-10.5809	0.025864	58	0.2676	0.004871	406.1587	HexNAc(2)	P01861_SVVTVPSSSLGTKTYTCNVDHKPSNTK_HexNAc(2)	File25305 Spectrum14766 scans: 20024
P01861	TVPSSSLGTKTYTCNVDHKPSNTKVDK	C14(Carbamidomethyl);N15(Deamidated)	3758.000	3621.72	4	906.438	2964.45	0.04376	12.0827	0.44683	56	0.2756	0.004871	656.2276	Hex(1)HexNAc(1)Neu5Ac(1)	P01861_TVPSSSLGTKTYTCNVDHKPSNTKVDK_Hex(1)HexNAc(1)Neu5Ac(1)	File25305 Spectrum12757 scans: 17915
P19827	LQPSPTHSSSNTQR		1713.000	2194.97	3	732.664	1538.74	-0.000861909	-0.392675	0.015427	56	0.1041	0.00146	656.2276	Hex(1)HexNAc(1)Neu5Ac(1)	P19827_LQPSPTHSSSNTQR_Hex(1)HexNAc(1)Neu5Ac(1)	File25305 Spectrum1204 scans: 5779
P02671	GSSGTGSTGNQNPGSPRPGSTGTWNPGSSER		3047.000	3176.37	3	1059.8	2973.32	-0.0278604	-8.77114	0.0016404	55	0.1387	0.002698	203.0794	HexNAc(1)	P02671_GSSGTGSTGNQNPGSPRPGSTGTWNPGSSER_HexNAc(1)	File25305 Spectrum8817 scans: 13778
P04196	SSTTKPPFKPHGSRDHHHPHKPHEHGPPPPPDER		1709.000	4513.11	7	645.738	3856.88	0.0051112	1.13252	0.01043	54	0.09669	0.00146	656.2276	Hex(1)HexNAc(1)Neu5Ac(1)	P04196_SSTTKPPFKPHGSRDHHHPHKPHEHGPPPPPDER_Hex(1)HexNAc(1)Neu5Ac(1)	File25305 Spectrum1183 scans: 5757
Q14520	HPYTGPSCSQVVPVCRPNPCQNGATCSR	C8(Carbamidomethyl);C15(Carbamidomethyl);C20(Carbamidomethyl);N22(Deamidated);C26(Carbamidomethyl)	3262.000	3389.47	4	848.375	3186.39	0.00750387	2.21388	0.048888	53	0.1628	0.002698	203.0794	HexNAc(1)	Q14520_HPYTGPSCSQVVPVCRPNPCQNGATCSR_HexNAc(1)	File25305 Spectrum10017 scans: 15038
P02768	NEVTEFAKTCVADESAENCDK	N1(Deamidated);C10(Carbamidomethyl);C19(Carbamidomethyl)	2588.000	2824.15	4	707.045	2417	-0.0105594	-3.73896	0.014949	53	0.2297	0.003723	406.1587	HexNAc(2)	P02768_NEVTEFAKTCVADESAENCDK_HexNAc(2)	File25305 Spectrum6161 scans: 10984
Q8NFD5	AAASPAWAAAQQRSHPAMSPGTPGPTMGR	Q11(Deamidated);Q12(Deamidated)	4309.000	3227.48	3	1076.83	2861.33	0.0128718	3.98817	0.27848	52	0.2921	0.005986	365.1322	Hex(1)HexNAc(1)	Q8NFD5_AAASPAWAAAQQRSHPAMSPGTPGPTMGR_Hex(1)HexNAc(1)	File25305 Spectrum15811 scans: 21123
P02671	PGSTGSWNSGSSGTGSTGNQNPGSPRPGSTGTWNPGSSER	N8(Deamidated)	3012.000	4359.94	5	872.996	3847.67	0.0852069	19.5431	0.17177	52	0.1968	0.003723	511.1901	Fuc(1)Hex(1)HexNAc(1)	P02671_PGSTGSWNSGSSGTGSTGNQNPGSPRPGSTGTWNPGSSER_Fuc(1)Hex(1)HexNAc(1)	File25305 Spectrum8616 scans: 13567
Q8TD16	AGLLATLQDTQKQLEHTRGSLSEQQEK	Q11(Deamidated);Q13(Deamidated);Q25(Deamidated)	4734.000	3523.72	3	1175.58	3011.5	0.0180642	5.12645	0.35003	51	0.2876	0.005986	511.1901	Fuc(1)Hex(1)HexNAc(1)	Q8TD16_AGLLATLQDTQKQLEHTRGSLSEQQEK_Fuc(1)Hex(1)HexNAc(1)	File25305 Spectrum18143 scans: 23588
P04004	FTMPEDEYTVYDDGEEKNNATVHEQVGGPSLTSDLQAQSK	M3(Oxidation)	4475.000	4939.15	4	1235.8	4444.98	0.00158041	0.319976	0.24398	51	0.2311	0.003723	494.1748	HexNAc(1)Neu5Ac(1)	P04004_FTMPEDEYTVYDDGEEKNNATVHEQVGGPSLTSDLQAQSK_HexNAc(1)Neu5Ac(1)	File25305 Spectrum16725 scans: 22083
P01009	AAQKTDTSHHDQDHPTFNK	Q3(Deamidated)	1940.000	2834.21	4	709.56	2177.97	0.0102712	3.62402	0.0078699	50	0.1296	0.002698	656.2276	Hex(1)HexNAc(1)Neu5Ac(1)	P01009_AAQKTDTSHHDQDHPTFNK_Hex(1)HexNAc(1)Neu5Ac(1)	File25305 Spectrum2486 scans: 7125
P02768	CEKPLLEKSHCIAEVENDEMPADLPSLAADFVESK	C1(Carbamidomethyl);C11(Carbamidomethyl);N17(Deamidated);M20(Oxidation)	4537.000	4644.07	4	1162.02	3987.84	-0.00469191	-1.0103	0.14596	50	0.1282	0.002698	656.2276	Hex(1)HexNAc(1)Neu5Ac(1)	P02768_CEKPLLEKSHCIAEVENDEMPADLPSLAADFVESK_Hex(1)HexNAc(1)Neu5Ac(1)	File25305 Spectrum17068 scans: 22443
P02679	KDTVQIHDITGKDCQDIANK	C14(Carbamidomethyl)	3390.000	2955.33	4	739.839	2298.13	-0.0313835	-10.6193	0.064057	49	0.2425	0.003723	656.2276	Hex(1)HexNAc(1)Neu5Ac(1)	P02679_KDTVQIHDITGKDCQDIANK_Hex(1)HexNAc(1)Neu5Ac(1)	File25305 Spectrum10723 scans: 15779
Q8N2E2	VFFLENPHVQSVAIESQEFFAGFK	N6(Deamidated);Q10(Deamidated)	2685.000	3718.68	3	1240.57	2771.35	0.00548654	1.4754	0.34507	48	0.2293	0.003723	947.3230	Hex(1)HexNAc(1)Neu5Ac(2)	Q8N2E2_VFFLENPHVQSVAIESQEFFAGFK_Hex(1)HexNAc(1)Neu5Ac(2)	File25305 Spectrum6712 scans: 11568
P02790	LPPTSAHGNVAEGETKPDPDVTER		2770.000	3376.52	3	1126.51	2516.21	-0.00190783	-0.565027	0.20995	47	0.2246	0.003723	859.3070	Hex(1)HexNAc(2)Neu5Ac(1)	P02790_LPPTSAHGNVAEGETKPDPDVTER_Hex(1)HexNAc(2)Neu5Ac(1)	File25305 Spectrum7204 scans: 12084
Q8TC27	SLKEQPMDDNIFISEK	Q5(Deamidated)	4859.000	2259.02	3	754.013	1893.9	-0.0171243	-7.58042	0.019301	47	0.3002	0.008344	365.1322	Hex(1)HexNAc(1)	Q8TC27_SLKEQPMDDNIFISEK_Hex(1)HexNAc(1)	File25305 Spectrum18811 scans: 24343
O43175	CARGGIVDEGALLRALQSGQCAGAALDVFTEEPPR	C1(Carbamidomethyl);Q20(Deamidated);C21(Carbamidomethyl)	3649.000	4178.98	6	697.504	3684.8	0.00671304	1.60638	3.933	46	0.1469	0.002698	494.1748	HexNAc(1)Neu5Ac(1)	O43175_CARGGIVDEGALLRALQSGQCAGAALDVFTEEPPR_HexNAc(1)Neu5Ac(1)	File25305 Spectrum12154 scans: 17282
P02787	VPQNTGGKNPDPWAKNLNEK	Q3(Deamidated);N4(Deamidated)	3106.000	2615.28	4	654.827	2208.08	0.0354148	13.5415	0.011943	44	0.1385	0.002698	406.1587	HexNAc(2)	P02787_VPQNTGGKNPDPWAKNLNEK_HexNAc(2)	File25305 Spectrum9146 scans: 14123
Q14585	KAFGSGSNLTHHQR	Q13(Deamidated)	2071.000	2399.06	3	800.693	1539.75	-0.00406699	-1.69525	0.098558	41	0.2556	0.004871	859.3070	Hex(1)HexNAc(2)Neu5Ac(1)	Q14585_KAFGSGSNLTHHQR_Hex(1)HexNAc(2)Neu5Ac(1)	File25305 Spectrum3229 scans: 7905
Q9ULD2	SAVKSNQEDVDKASSSNSACETGSVSALFQK	Q7(Deamidated);N17(Deamidated);C20(Carbamidomethyl)	3693.000	4180.81	6	697.809	3232.47	0.0143125	3.42339	4.791	41	0.1583	0.002698	947.3230	Hex(1)HexNAc(1)Neu5Ac(2)	Q9ULD2_SAVKSNQEDVDKASSSNSACETGSVSALFQK_Hex(1)HexNAc(1)Neu5Ac(2)	File25305 Spectrum12397 scans: 17537
Q96RE9	CSECGKAFCQK	C1(Carbamidomethyl);C4(Carbamidomethyl);C9(Carbamidomethyl);Q10(Deamidated)	2264.000	2321.88	3	774.968	1374.54	0.0240291	10.3489	1.5861e-05	39	0.06951	0.00146	947.3230	Hex(1)HexNAc(1)Neu5Ac(2)	Q96RE9_CSECGKAFCQK_Hex(1)HexNAc(1)Neu5Ac(2)	File25305 Spectrum4309 scans: 9039
P02671	SSGPGSTGSWNSGSSGTGSTGNQNPGSPRPGSTGTWNPGSSER		3074.000	4443.9	4	1111.98	4077.77	7.84005e-05	0.0176423	19.771	34	0.1724	0.003723	365.1322	Hex(1)HexNAc(1)	P02671_SSGPGSTGSWNSGSSGTGSTGNQNPGSPRPGSTGTWNPGSSER_Hex(1)HexNAc(1)	File25305 Spectrum8962 scans: 13930
P01857	HTFPAVLQSSGLYSLSSVVTVPSSSLGTQTYICNVNHKPSNTK	C33(Carbamidomethyl);Q8(Deamidated);Q29(Deamidated)	4145.000	4811.45	6	802.916	4607.29	0.0870995	18.1025	17.059	33	0.2911	0.005986	203.0794	HexNAc(1)	P01857_HTFPAVLQSSGLYSLSSVVTVPSSSLGTQTYICNVNHKPSNTK_HexNAc(1)	File25305 Spectrum14897 scans: 20162
P01857	VLQSSGLYSLSSVVTVPSSSLGTQTYICNVNHKPSNTK	C28(Carbamidomethyl);N31(Deamidated)	4224.000	4564.22	3	1522.41	4053.04	-0.00550492	-1.2061	4.3569	31	0.2622	0.004871	511.1901	Fuc(1)Hex(1)HexNAc(1)	P01857_VLQSSGLYSLSSVVTVPSSSLGTQTYICNVNHKPSNTK_Fuc(1)Hex(1)HexNAc(1)	File25305 Spectrum15334 scans: 20621
P05156	ISQMKACDGINDCGDQSDELCCK	M4(Oxidation);C7(Carbamidomethyl);C13(Carbamidomethyl);C21(Carbamidomethyl);C22(Carbamidomethyl)	2610.000	2923.16	4	731.798	2719.07	0.0146046	4.99618	0.82601	26	0.2984	0.005986	203.0794	HexNAc(1)	P05156_ISQMKACDGINDCGDQSDELCCK_HexNAc(1)	File25305 Spectrum6281 scans: 11110
P01861	VTVPSSSLGTKTYTCNVDHKPSNTK	C15(Carbamidomethyl)	3866.000	3215.54	3	1072.85	2720.34	0.0170582	5.30492	0.48638	25	0.2915	0.005986	494.1748	HexNAc(1)Neu5Ac(1)	P01861_VTVPSSSLGTKTYTCNVDHKPSNTK_HexNAc(1)Neu5Ac(1)	File25305 Spectrum13357 scans: 18545
Q2V2M9	AGAGQVADEAGQDIASAHEGAETEVEQALEQEPEERASLSEKER	Q5(Deamidated);Q12(Deamidated)	4172.000	4827.18	6	805.538	4623.1	0.00523264	1.084	24.113	20	0.2974	0.005986	203.0794	HexNAc(1)	Q2V2M9_AGAGQVADEAGQDIASAHEGAETEVEQALEQEPEERASLSEKER_HexNAc(1)	File25305 Spectrum15053 scans: 20326
Q14624	IEETTMTTQTPAPIQAPSAILPLPGQSVER		4905.000	4122.98	3	1375.33	3175.64	0.0154907	3.75716	1.009e-20	197	1.424e-06	0.001301	947.3230	Hex(1)HexNAc(1)Neu5Ac(2)	Q14624_IEETTMTTQTPAPIQAPSAILPLPGQSVER_Hex(1)HexNAc(1)Neu5Ac(2)	File25307 Spectrum19861 scans: 24954
P00747	SCDSSPVSTEQLAPTAPPELTPVVQDCYHGDGQSYR	C2(Carbamidomethyl);Q11(Deamidated);C27(Carbamidomethyl)	4628.000	4896.12	3	1633.05	3948.74	0.0540442	11.0382	7.7976e-16	174	3.134e-07	0.001301	947.3230	Hex(1)HexNAc(1)Neu5Ac(2)	P00747_SCDSSPVSTEQLAPTAPPELTPVVQDCYHGDGQSYR_Hex(1)HexNAc(1)Neu5Ac(2)	File25307 Spectrum18379 scans: 23308
P04004	DDGEEKNNATVHEQVGGPSLTSDLQAQSK	N7(Deamidated);N8(Deamidated)	4657.000	4880.05	3	1627.69	3055.39	0.0115914	2.37526	3.6268e-16	171	4.228e-05	0.001301	1823.6453	Fuc(1)Hex(3)HexNAc(3)Neu5Ac(2)	P04004_DDGEEKNNATVHEQVGGPSLTSDLQAQSK_Fuc(1)Hex(3)HexNAc(3)Neu5Ac(2)	File25307 Spectrum18537 scans: 23475
Q16610	NVALVSGDTENAKGQGEQGSTGGTNISSTSEPKEE		3280.000	4424.94	3	1475.99	3477.6	0.023648	5.34425	1.1286e-14	170	5.59e-05	0.001301	947.3230	Hex(1)HexNAc(1)Neu5Ac(2)	Q16610_NVALVSGDTENAKGQGEQGSTGGTNISSTSEPKEE_Hex(1)HexNAc(1)Neu5Ac(2)	File25307 Spectrum10929 scans: 15484
P0C0L5	GVAHNNLMAMAQETGDNLYWGSVTGSQSNAVSPTPAPR	M10(Oxidation);Q12(Deamidated);N17(Deamidated)	3996.000	4352.99	4	1089.25	3945.79	0.0391458	8.99286	7.1204e-19	168	8.169e-08	0.001301	406.1587	HexNAc(2)	P0C0L5_GVAHNNLMAMAQETGDNLYWGSVTGSQSNAVSPTPAPR_HexNAc(2)	File25307 Spectrum14889 scans: 19642
P0C0L4	LGVAHNNLMAMAQETGDNLYWGSVTGSQSNAVSPTPAPR	N6(Deamidated)	3648.000	4989.21	5	998.848	4041.89	-0.0127958	-2.56469	2.5396e-17	163	1.548e-07	0.001301	947.3230	Hex(1)HexNAc(1)Neu5Ac(2)	P0C0L4_LGVAHNNLMAMAQETGDNLYWGSVTGSQSNAVSPTPAPR_Hex(1)HexNAc(1)Neu5Ac(2)	File25307 Spectrum12965 scans: 17622
P01834	QWKVDNALQSGNSQESVTEQDSK		2679.000	4400.91	3	1467.98	2577.19	0.072868	16.5575	2.6364e-12	160	9.784e-06	0.001301	1823.6453	Fuc(1)Hex(3)HexNAc(3)Neu5Ac(2)	P01834_QWKVDNALQSGNSQESVTEQDSK_Fuc(1)Hex(3)HexNAc(3)Neu5Ac(2)	File25307 Spectrum7463 scans: 11844
P00747	KIPSCDSSPVSTEQLAPTAPPELTPVVQDCYHGDGQSYR	C5(Carbamidomethyl);Q14(Deamidated);C30(Carbamidomethyl)	4560.000	4799.15	3	1600.72	4286.97	-0.0215154	-4.48317	4.2208e-16	157	1.579e-05	0.001301	511.1901	Fuc(1)Hex(1)HexNAc(1)	P00747_KIPSCDSSPVSTEQLAPTAPPELTPVVQDCYHGDGQSYR_Fuc(1)Hex(1)HexNAc(1)	File25307 Spectrum18006 scans: 22916
P0C0L5	RGVAHNNLMAMAQETGDNLYWGSVTGSQSNAVSPTPAPR	M9(Oxidation);M11(Oxidation);Q13(Deamidated)	4181.000	4482.06	4	1121.52	4116.9	0.0213044	4.75326	3.5594e-14	152	4.598e-05	0.001301	365.1322	Hex(1)HexNAc(1)	P0C0L5_RGVAHNNLMAMAQETGDNLYWGSVTGSQSNAVSPTPAPR_Hex(1)HexNAc(1)	File25307 Spectrum15917 scans: 20721
P02790	ATPLPPTSAHGNVAEGETKPDPDVTER		3407.000	3442.57	3	1148.53	2785.35	-0.012664	-3.67864	3.9134e-14	151	0.0001228	0.001301	656.2276	Hex(1)HexNAc(1)Neu5Ac(1)	P02790_ATPLPPTSAHGNVAEGETKPDPDVTER_Hex(1)HexNAc(1)Neu5Ac(1)	File25307 Spectrum11631 scans: 16221
P02671	GTGSETESPRNPSSAGSWNSGSSGPGSTGNR		2717.000	3620.53	3	1207.85	2964.28	0.0157594	4.35281	1.1706e-14	149	1.19e-06	0.001301	656.2276	Hex(1)HexNAc(1)Neu5Ac(1)	P02671_GTGSETESPRNPSSAGSWNSGSSGPGSTGNR_Hex(1)HexNAc(1)Neu5Ac(1)	File25307 Spectrum7681 scans: 12073
P05154	RVEDLHVGATVAPSSR		3063.000	2640.22	3	881.081	1692.89	0.0062395	2.36325	2.8055e-11	147	0.0006843	0.001301	947.3230	Hex(1)HexNAc(1)Neu5Ac(2)	P05154_RVEDLHVGATVAPSSR_Hex(1)HexNAc(1)Neu5Ac(2)	File25307 Spectrum9723 scans: 14218
P02671	NPGSSGTGGTATWKPGSSGPGSTGSWNSGSSGTGSTGNQNPGSPR	N1(Deamidated)	3303.000	4778.07	4	1195.53	4120.8	0.0461126	9.65088	1.2357e-10	142	8.945e-05	0.001301	656.2276	Hex(1)HexNAc(1)Neu5Ac(1)	P02671_NPGSSGTGGTATWKPGSSGPGSTGSWNSGSSGTGSTGNQNPGSPR_Hex(1)HexNAc(1)Neu5Ac(1)	File25307 Spectrum11057 scans: 15618
P01876	HVKHYTNPSQDVTVPCPVPSTPPTPSPSTPPTPSPSCCHPR	C37(Carbamidomethyl);C38(Carbamidomethyl);C16(Carbamidomethyl)	3655.000	4866.17	4	1217.55	4500.1	-0.0730975	-15.0216	2.0337e-11	140	5.301e-05	0.001301	365.1322	Hex(1)HexNAc(1)	P01876_HVKHYTNPSQDVTVPCPVPSTPPTPSPSTPPTPSPSCCHPR_Hex(1)HexNAc(1)	File25307 Spectrum13003 scans: 17662
P02671	SETESPRNPSSAGSWNSGSSGPGSTGNR	N8(Deamidated);N27(Deamidated)	2545.000	3698.55	4	925.644	2751.16	0.0618577	16.7249	5.8501e-12	140	1.883e-05	0.001301	947.3230	Hex(1)HexNAc(1)Neu5Ac(2)	P02671_SETESPRNPSSAGSWNSGSSGPGSTGNR_Hex(1)HexNAc(1)Neu5Ac(2)	File25307 Spectrum6701 scans: 11034
P05155	SSNPNATSSSSQDPESLQDR	N3(Deamidated)	2610.000	2601.05	3	868.024	2106.89	-0.0198929	-7.64803	1.244e-09	139	0.00144	0.001301	494.1748	HexNAc(1)Neu5Ac(1)	P05155_SSNPNATSSSSQDPESLQDR_HexNAc(1)Neu5Ac(1)	File25307 Spectrum7069 scans: 11421
P02787	PCADGTDFPQLCQLCPGCGCSTLNQYFGYSGAFK	C2(Carbamidomethyl);Q10(Deamidated);C12(Carbamidomethyl);Q13(Deamidated);C15(Carbamidomethyl);C18(Carbamidomethyl);C20(Carbamidomethyl)	4823.000	4372.82	3	1458.62	3877.58	0.0628133	14.3645	1.5998e-15	138	6.689e-07	0.001301	494.1748	HexNAc(1)Neu5Ac(1)	P02787_PCADGTDFPQLCQLCPGCGCSTLNQYFGYSGAFK_HexNAc(1)Neu5Ac(1)	File25307 Spectrum19425 scans: 24471
P0C0L5::P0C0L4	GSVTGSQSNAVSPTPAPR		2541.000	2368.07	3	790.365	1711.85	-0.00185529	-0.783458	2.5759e-09	137	0.001147	0.001301	656.2276	Hex(1)HexNAc(1)Neu5Ac(1)	P0C0L5::P0C0L4_GSVTGSQSNAVSPTPAPR_Hex(1)HexNAc(1)Neu5Ac(1)	File25307 Spectrum6678 scans: 11010
P02671	ESPRNPSSAGSWNSGSSGPGSTGNR	N5(Deamidated)	2477.000	2944.26	3	982.428	2433.05	0.0164498	5.58709	1.4636e-09	136	0.0001326	0.001301	511.1901	Fuc(1)Hex(1)HexNAc(1)	P02671_ESPRNPSSAGSWNSGSSGPGSTGNR_Fuc(1)Hex(1)HexNAc(1)	File25307 Spectrum6307 scans: 10621
P05154	VEDLHVGATVAPSSR		3133.000	2193.02	3	732.015	1536.79	0.00565054	2.5766	9.4361e-10	134	0.002087	0.001301	656.2276	Hex(1)HexNAc(1)Neu5Ac(1)	P05154_VEDLHVGATVAPSSR_Hex(1)HexNAc(1)Neu5Ac(1)	File25307 Spectrum10112 scans: 14626
Q9UGM5	FVSVTCDFFESQAPATGSENSAVNQKPTNLPK	C6(Carbamidomethyl);Q12(Deamidated)	4504.000	3836.81	3	1279.94	3470.63	0.0471873	12.2986	1.544e-10	131	8.316e-05	0.001301	365.1322	Hex(1)HexNAc(1)	Q9UGM5_FVSVTCDFFESQAPATGSENSAVNQKPTNLPK_Hex(1)HexNAc(1)	File25307 Spectrum17700 scans: 22595
P10643	GGQPCVGNAFETQSCEPTR	C5(Carbamidomethyl);C15(Carbamidomethyl)	3576.000	2459.07	3	820.696	2093.89	0.0444837	18.0897	9.99e-10	124	8.685e-05	0.001301	365.1322	Hex(1)HexNAc(1)	P10643_GGQPCVGNAFETQSCEPTR_Hex(1)HexNAc(1)	File25307 Spectrum12570 scans: 17207
P04004	DVFTMPEDEYTVYDDGEEKNNATVHEQVGGPSLTSDLQAQSK	M5(Oxidation);N20(Deamidated)	4655.000	4863.04	4	1216.77	4660.06	-0.0927922	-19.0811	2.1543e-08	124	0.0009116	0.001301	203.0794	HexNAc(1)	P04004_DVFTMPEDEYTVYDDGEEKNNATVHEQVGGPSLTSDLQAQSK_HexNAc(1)	File25307 Spectrum18528 scans: 23466
Q14624	SRVMNMKIEETTMTTQTPAPIQAPSAILPLPGQSVER	N5(Deamidated);M13(Oxidation);Q16(Deamidated)	4913.000	4534.13	4	1134.54	4040.03	-0.0731447	-16.132	7.4409e-11	124	0.0007379	0.001301	494.1748	HexNAc(1)Neu5Ac(1)	Q14624_SRVMNMKIEETTMTTQTPAPIQAPSAILPLPGQSVER_HexNAc(1)Neu5Ac(1)	File25307 Spectrum19900 scans: 24999
P02751	QMVQPQSPVAVSQSKPGCYDNGK	Q4(Deamidated);Q6(Deamidated);C18(Carbamidomethyl);N21(Deamidated)	3027.000	2873.32	3	958.781	2507.13	0.0549625	19.1286	2.8468e-10	123	0.0018	0.001301	365.1322	Hex(1)HexNAc(1)	P02751_QMVQPQSPVAVSQSKPGCYDNGK_Hex(1)HexNAc(1)	File25307 Spectrum9512 scans: 13996
P0C0L5::P0C0L4	GSVTGSQSNAVSPTPAPR		2624.000	2659.17	3	887.398	1711.85	-0.000355286	-0.133608	9.361e-07	123	0.009026	0.001301	947.3230	Hex(1)HexNAc(1)Neu5Ac(2)	P0C0L5::P0C0L4_GSVTGSQSNAVSPTPAPR_Hex(1)HexNAc(1)Neu5Ac(2)	File25307 Spectrum7152 scans: 11508
P00747	IPSCDSSPVSTEQLAPTAPPELTPVVQDCYHGDGQSYR	C4(Carbamidomethyl);C29(Carbamidomethyl)	4552.000	4523.06	3	1508.69	4157.89	0.0324319	7.17035	2.217e-10	122	0.0004953	0.001301	365.1322	Hex(1)HexNAc(1)	P00747_IPSCDSSPVSTEQLAPTAPPELTPVVQDCYHGDGQSYR_Hex(1)HexNAc(1)	File25307 Spectrum17961 scans: 22869
P04004	FNVDKKCQCDELCSYYQSCCTDYTAECKPQVTR	N2(Deamidated);C7(Carbamidomethyl);Q8(Deamidated);C9(Carbamidomethyl);C13(Carbamidomethyl);Q17(Deamidated);C19(Carbamidomethyl);C20(Carbamidomethyl);C27(Carbamidomethyl)	3880.000	4581.82	4	1146.46	4215.69	-0.00601231	-1.31221	2.9104e-08	120	0.0007394	0.001301	365.1322	Hex(1)HexNAc(1)	P04004_FNVDKKCQCDELCSYYQSCCTDYTAECKPQVTR_Hex(1)HexNAc(1)	File25307 Spectrum14251 scans: 18972
P02768	KLVNEVTEFAKTCVADESAENCDK	N4(Deamidated);C13(Carbamidomethyl);C22(Carbamidomethyl)	2959.000	3616.54	3	1206.52	2757.25	-0.00985521	-2.72504	2.8313e-08	119	0.006114	0.001301	859.3070	Hex(1)HexNAc(2)Neu5Ac(1)	P02768_KLVNEVTEFAKTCVADESAENCDK_Hex(1)HexNAc(2)Neu5Ac(1)	File25307 Spectrum9118 scans: 13582
P01834	NALQSGNSQESVTEQDSK	N1(Deamidated)	1934.000	2124.91	2	1063.46	1921.85	-0.0212607	-10.0055	1.7269e-09	118	0.0002346	0.001301	203.0794	HexNAc(1)	P01834_NALQSGNSQESVTEQDSK_HexNAc(1)	File25307 Spectrum3205 scans: 7363
P0C0L5	RGVAHNNLMAMAQETGDNLYWGSVTGSQSNAVSPTPAPR	M9(Oxidation);Q13(Deamidated);N18(Deamidated)	4352.000	4962.21	4	1241.56	4101.89	0.0133348	2.68727	1.0042e-08	115	0.002818	0.001301	859.3070	Hex(1)HexNAc(2)Neu5Ac(1)	P0C0L5_RGVAHNNLMAMAQETGDNLYWGSVTGSQSNAVSPTPAPR_Hex(1)HexNAc(2)Neu5Ac(1)	File25307 Spectrum16858 scans: 21711
Q14624	MNMKIEETTMTTQTPAPIQAPSAILPLPGQSVER	Q13(Deamidated)	4909.000	4541.15	4	1136.3	3680.85	-0.00172972	-0.380898	1.7533e-09	115	0.002335	0.001301	859.3070	Hex(1)HexNAc(2)Neu5Ac(1)	Q14624_MNMKIEETTMTTQTPAPIQAPSAILPLPGQSVER_Hex(1)HexNAc(2)Neu5Ac(1)	File25307 Spectrum19878 scans: 24973
P05155	ATSSSSQDPESLQDRGEGK		2315.000	2634.12	3	879.048	1977.89	0.00701471	2.66302	3.3209e-05	114	0.02596	0.001301	656.2276	Hex(1)HexNAc(1)Neu5Ac(1)	P05155_ATSSSSQDPESLQDRGEGK_Hex(1)HexNAc(1)Neu5Ac(1)	File25307 Spectrum5380 scans: 9647
O75882	RPCVNGGRCNPGTGQCVCPAGWVGEQCQHCGGR	C3(Carbamidomethyl);C9(Carbamidomethyl);C16(Carbamidomethyl);C18(Carbamidomethyl);C27(Carbamidomethyl);C30(Carbamidomethyl)	3254.000	4133.64	4	1034.42	3727.56	-0.080034	-19.3616	1.7823e-09	114	0.001521	0.001301	406.1587	HexNAc(2)	O75882_RPCVNGGRCNPGTGQCVCPAGWVGEQCQHCGGR_HexNAc(2)	File25307 Spectrum10789 scans: 15337
P06681	NGMWDGETAVCDNGAGHCPNPGISLGAVR	M3(Oxidation);C11(Carbamidomethyl);C18(Carbamidomethyl)	4427.000	3538.55	3	1180.52	3027.3	0.0551985	15.5992	2.3542e-07	114	0.0007828	0.001301	511.1901	Fuc(1)Hex(1)HexNAc(1)	P06681_NGMWDGETAVCDNGAGHCPNPGISLGAVR_Fuc(1)Hex(1)HexNAc(1)	File25307 Spectrum17278 scans: 22152
P01857	SSVVTVPSSSLGTQTYICNVNHKPSNTKVDK	C18(Carbamidomethyl)	3927.000	3549.82	3	1184.28	3346.68	0.0569516	16.0435	2.9673e-08	113	0.00321	0.001301	203.0794	HexNAc(1)	P01857_SSVVTVPSSSLGTQTYICNVNHKPSNTKVDK_HexNAc(1)	File25307 Spectrum14509 scans: 19243
P02671	STGSWNSGSSGTGSTGNQNPGSPRPGSTGTWNPGSSER		3269.000	4204.86	3	1402.63	3692.61	0.064103	15.245	2.2629e-09	106	0.00141	0.001301	511.1901	Fuc(1)Hex(1)HexNAc(1)	P02671_STGSWNSGSSGTGSTGNQNPGSPRPGSTGTWNPGSSER_Fuc(1)Hex(1)HexNAc(1)	File25307 Spectrum10874 scans: 15426
P08603	GYEYSERGDAVCTESGWRPLPSCEEK	C12(Carbamidomethyl);C23(Carbamidomethyl)	3961.000	3467.42	3	1156.81	3061.32	-0.0558288	-16.1009	1.7214e-08	106	0.0007976	0.001301	406.1587	HexNAc(2)	P08603_GYEYSERGDAVCTESGWRPLPSCEEK_HexNAc(2)	File25307 Spectrum14696 scans: 19439
P01861	SVVTVPSSSLGTKTYTCNVDHKPSNTKVDK	C17(Carbamidomethyl)	3823.000	3654.78	4	914.701	3248.63	-0.017712	-4.84626	9.3094e-10	106	0.00426	0.001301	406.1587	HexNAc(2)	P01861_SVVTVPSSSLGTKTYTCNVDHKPSNTKVDK_HexNAc(2)	File25307 Spectrum13936 scans: 18641
P01860	SVVTVPSSSLGTQTYTCNVNHKPSNTKVDK	C17(Carbamidomethyl);N20(Deamidated)	3823.000	3654.78	4	914.701	3248.6	0.0186735	5.10934	9.3094e-10	106	0.002709	0.001301	406.1587	HexNAc(2)	P01860_SVVTVPSSSLGTQTYTCNVNHKPSNTKVDK_HexNAc(2)	File25307 Spectrum13936 scans: 18641
P02790	TPLPPTSAHGNVAEGETKPDPDVTER		2861.000	3574.65	4	894.669	2714.31	0.0242734	6.79042	1.5736e-06	105	0.01412	0.001301	859.3070	Hex(1)HexNAc(2)Neu5Ac(1)	P02790_TPLPPTSAHGNVAEGETKPDPDVTER_Hex(1)HexNAc(2)Neu5Ac(1)	File25307 Spectrum8542 scans: 12977
P01023	CRKYSDASDCHGEDSQAFCEK	C1(Carbamidomethyl);C10(Carbamidomethyl);C19(Carbamidomethyl)	2223.000	3044.14	3	1015.72	2549	-0.0343684	-11.29	2.28e-07	105	0.005744	0.001301	494.1748	HexNAc(1)Neu5Ac(1)	P01023_CRKYSDASDCHGEDSQAFCEK_HexNAc(1)Neu5Ac(1)	File25307 Spectrum4855 scans: 9096
P02768	DYLSVVLNQLCVLHEK	C11(Carbamidomethyl)	4821.000	2788.35	4	698.095	1929	0.0417104	14.9588	3.0585e-06	105	0.01843	0.001301	859.3070	Hex(1)HexNAc(2)Neu5Ac(1)	P02768_DYLSVVLNQLCVLHEK_Hex(1)HexNAc(2)Neu5Ac(1)	File25307 Spectrum19410 scans: 24455
P01871	SAVGEASICEDDWNSGER	C9(Carbamidomethyl)	5125.000	2345.98	2	1174	1980.81	0.038699	16.4958	2.2409e-08	102	0.005698	0.001301	365.1322	Hex(1)HexNAc(1)	P01871_SAVGEASICEDDWNSGER_Hex(1)HexNAc(1)	File25307 Spectrum21031 scans: 26249
P13671	CICMSPEEDCSHHSEDLCVFDTDSNDYFTSPACK	C1(Carbamidomethyl);C33(Carbamidomethyl);C3(Carbamidomethyl);M4(Oxidation);C10(Carbamidomethyl);C18(Carbamidomethyl)	4358.000	4640.76	4	1161.2	4128.55	0.0160726	3.46336	3.5123e-07	101	0.001948	0.001301	511.1901	Fuc(1)Hex(1)HexNAc(1)	P13671_CICMSPEEDCSHHSEDLCVFDTDSNDYFTSPACK_Fuc(1)Hex(1)HexNAc(1)	File25307 Spectrum16891 scans: 21746
P01861::P01859	CNVDHKPSNTKVDK	C1(Carbamidomethyl)	1729.000	2005.96	2	1003.99	1640.79	0.0295935	14.7528	1.5023e-07	100	0.01109	0.001301	365.1322	Hex(1)HexNAc(1)	P01861::P01859_CNVDHKPSNTKVDK_Hex(1)HexNAc(1)	File25307 Spectrum2061 scans: 6162
P02671	HRHPDEAAFFDTASTGK		3035.000	2088.95	3	697.324	1885.87	0.000946639	0.453165	1.9338e-06	99	0.02684	0.001301	203.0794	HexNAc(1)	P02671_HRHPDEAAFFDTASTGK_HexNAc(1)	File25307 Spectrum9559 scans: 14045
P00747	SCDSSPVSTEQLAPTAPPELTPVVQDCYHGDGQSYR	C2(Carbamidomethyl);Q11(Deamidated);C27(Carbamidomethyl)	4603.000	4606.05	3	1536.36	3948.74	0.0810755	17.6019	2.5878e-08	98	0.002098	0.001301	656.2276	Hex(1)HexNAc(1)Neu5Ac(1)	P00747_SCDSSPVSTEQLAPTAPPELTPVVQDCYHGDGQSYR_Hex(1)HexNAc(1)Neu5Ac(1)	File25307 Spectrum18243 scans: 23165
P01876	KHYTNPSQDVTVPCPVPSTPPTPSPSTPPTPSPSCCHPR	C35(Carbamidomethyl);C36(Carbamidomethyl);Q8(Deamidated);C14(Carbamidomethyl)	3731.000	4777.11	4	1195.28	4264.96	-0.0452873	-9.48007	1.5723e-05	96	0.00974	0.001301	511.1901	Fuc(1)Hex(1)HexNAc(1)	P01876_KHYTNPSQDVTVPCPVPSTPPTPSPSTPPTPSPSCCHPR_Fuc(1)Hex(1)HexNAc(1)	File25307 Spectrum13429 scans: 18109
P02671	SGSSGPGSTGNR		2524.000	2010.83	2	1006.42	1062.47	0.0337643	16.7912	2.0959e-05	96	0.0611	0.001301	947.3230	Hex(1)HexNAc(1)Neu5Ac(2)	P02671_SGSSGPGSTGNR_Hex(1)HexNAc(1)Neu5Ac(2)	File25307 Spectrum6580 scans: 10907
Q96PD5	DGSPDVTTADIGANTPDATK		3286.000	2601.13	3	868.052	1944.89	0.0150263	5.77684	0.00013221	92	0.0564	0.001301	656.2276	Hex(1)HexNAc(1)Neu5Ac(1)	Q96PD5_DGSPDVTTADIGANTPDATK_Hex(1)HexNAc(1)Neu5Ac(1)	File25307 Spectrum10964 scans: 15521
P10909	FVGLLLTWESGQVLGDQTVSDNELQEMSNQGSK	Q12(Deamidated);Q17(Deamidated);M27(Oxidation)	3058.000	4137.81	4	1035.46	3626.69	-0.0738087	-17.8376	4.244e-05	92	0.01223	0.001301	511.1901	Fuc(1)Hex(1)HexNAc(1)	P10909_FVGLLLTWESGQVLGDQTVSDNELQEMSNQGSK_Fuc(1)Hex(1)HexNAc(1)	File25307 Spectrum9695 scans: 14188
P02649	AATVGSLAGQPLQER		3704.000	2153.02	3	718.682	1496.79	0.00216517	1.00564	0.00013243	92	0.02494	0.001301	656.2276	Hex(1)HexNAc(1)Neu5Ac(1)	P02649_AATVGSLAGQPLQER_Hex(1)HexNAc(1)Neu5Ac(1)	File25307 Spectrum13275 scans: 17947
P02787	VPQNTGGKNPDPWAK	Q3(Deamidated)	2553.000	2265.05	3	756.024	1608.79	0.0314505	13.8851	0.00031964	89	0.02697	0.001301	656.2276	Hex(1)HexNAc(1)Neu5Ac(1)	P02787_VPQNTGGKNPDPWAK_Hex(1)HexNAc(1)Neu5Ac(1)	File25307 Spectrum6746 scans: 11082
P02790	CWSLAIATPLPPTSAHGNVAEGETKPDPDVTER	C1(Carbamidomethyl);N18(Deamidated)	2889.000	4027.8	3	1343.61	3516.68	-0.0725423	-18.0104	2.4863e-06	89	0.003152	0.001301	511.1901	Fuc(1)Hex(1)HexNAc(1)	P02790_CWSLAIATPLPPTSAHGNVAEGETKPDPDVTER_Fuc(1)Hex(1)HexNAc(1)	File25307 Spectrum8707 scans: 13150
P02765	PPAGSPPDSHVLLAAPPGHQLHR		4661.000	3209.55	4	803.394	2350.23	0.0112475	3.50437	7.1724e-06	89	0.01269	0.001301	859.3070	Hex(1)HexNAc(2)Neu5Ac(1)	P02765_PPAGSPPDSHVLLAAPPGHQLHR_Hex(1)HexNAc(2)Neu5Ac(1)	File25307 Spectrum18560 scans: 23499
P09871	CKGDSGGAFAVQDPNDKTK	C1(Carbamidomethyl);N15(Deamidated)	2533.000	2401.03	3	801.352	1994.9	-0.0254986	-10.6198	1.3712e-05	89	0.01001	0.001301	406.1587	HexNAc(2)	P09871_CKGDSGGAFAVQDPNDKTK_HexNAc(2)	File25307 Spectrum6632 scans: 10962
O75882	NGGRCNPGTGQCVCPAGWVGEQCQHCGGR	N1(Deamidated);C5(Carbamidomethyl);C12(Carbamidomethyl);C14(Carbamidomethyl);C23(Carbamidomethyl);C26(Carbamidomethyl)	3259.000	4075.62	5	816.132	3216.29	0.026311	6.4557	1.7075e-05	88	0.02301	0.001301	859.3070	Hex(1)HexNAc(2)Neu5Ac(1)	O75882_NGGRCNPGTGQCVCPAGWVGEQCQHCGGR_Hex(1)HexNAc(2)Neu5Ac(1)	File25307 Spectrum10817 scans: 15366
P02679	GMQFSTWDNDNDKFEGNCAEQDGSGWWMNK	N9(Deamidated);N11(Deamidated);N17(Deamidated);C18(Carbamidomethyl)	4165.000	4050.6	5	811.128	3556.36	0.0738685	18.2364	1.6016e-05	87	0.003654	0.001301	494.1748	HexNAc(1)Neu5Ac(1)	P02679_GMQFSTWDNDNDKFEGNCAEQDGSGWWMNK_HexNAc(1)Neu5Ac(1)	File25307 Spectrum15829 scans: 20629
P0C0L5::P0C0L4	QETGDNLYWGSVTGSQSNAVSPTPAPR		4716.000	3678.64	4	920.668	2818.32	0.0160107	4.35234	2.2045e-05	87	0.02568	0.001301	859.3070	Hex(1)HexNAc(2)Neu5Ac(1)	P0C0L5::P0C0L4_QETGDNLYWGSVTGSQSNAVSPTPAPR_Hex(1)HexNAc(2)Neu5Ac(1)	File25307 Spectrum18861 scans: 23823
Q04756	AVPSSSSPQAQALTEDGRPCR	C20(Carbamidomethyl)	3063.000	2869.28	3	957.434	2213.05	0.00397757	1.38626	0.0025089	84	0.08494	0.001301	656.2276	Hex(1)HexNAc(1)Neu5Ac(1)	Q04756_AVPSSSSPQAQALTEDGRPCR_Hex(1)HexNAc(1)Neu5Ac(1)	File25307 Spectrum9722 scans: 14217
P01861::P01859	CNVDHKPSNTK	C1(Carbamidomethyl)	1622.000	1663.76	3	555.595	1298.6	0.0269371	16.1905	8.3595e-05	83	0.04015	0.001301	365.1322	Hex(1)HexNAc(1)	P01861::P01859_CNVDHKPSNTK_Hex(1)HexNAc(1)	File25307 Spectrum1454 scans: 5525
P0C0L4	PVDLLGVAHNNLMAMAQETGDNLYWGSVTGSQSNAVSPTPAPR	N10(Deamidated);N11(Deamidated);Q17(Deamidated)	4191.000	4672.1	4	1169.03	4468.1	-0.074104	-15.8609	2.2309e-05	83	0.01693	0.001301	203.0794	HexNAc(1)	P0C0L4_PVDLLGVAHNNLMAMAQETGDNLYWGSVTGSQSNAVSPTPAPR_HexNAc(1)	File25307 Spectrum15972 scans: 20779
P05154	KRVEDLHVGATVAPSSR		2348.000	2186.12	4	547.537	1820.99	0.00180001	0.823381	4.5182e-05	82	0.05174	0.001301	365.1322	Hex(1)HexNAc(1)	P05154_KRVEDLHVGATVAPSSR_Hex(1)HexNAc(1)	File25307 Spectrum5570 scans: 9847
P05155	PNATSSSSQDPESLQDRGEGK	N2(Deamidated)	2219.000	2555.1	3	852.708	2189.97	0.0024078	0.942349	0.00030032	82	0.03551	0.001301	365.1322	Hex(1)HexNAc(1)	P05155_PNATSSSSQDPESLQDRGEGK_Hex(1)HexNAc(1)	File25307 Spectrum4829 scans: 9069
P00742	CSLDNGDCDQFCHEEQNSVVCSCAR	C1(Carbamidomethyl);C8(Carbamidomethyl);C12(Carbamidomethyl);C21(Carbamidomethyl);C23(Carbamidomethyl)	3221.000	3452.35	3	1151.79	3046.14	0.0592479	17.1616	0.0010944	81	0.01974	0.001301	406.1587	HexNAc(2)	P00742_CSLDNGDCDQFCHEEQNSVVCSCAR_HexNAc(2)	File25307 Spectrum10607 scans: 15146
P01042	KESNEELTESCETK	N4(Deamidated);C11(Carbamidomethyl)	2192.000	2340.9	2	1171.46	1683.71	-0.042347	-18.09	0.0057036	80	0.08405	0.001301	656.2276	Hex(1)HexNAc(1)Neu5Ac(1)	P01042_KESNEELTESCETK_Hex(1)HexNAc(1)Neu5Ac(1)	File25307 Spectrum4675 scans: 8907
P19823	TSVTDVTQNNFHNYFGGSEIVVAGK		4466.000	3194.52	4	799.637	2683.29	0.0425851	13.3307	0.00056278	80	0.05098	0.001301	511.1901	Fuc(1)Hex(1)HexNAc(1)	P19823_TSVTDVTQNNFHNYFGGSEIVVAGK_Fuc(1)Hex(1)HexNAc(1)	File25307 Spectrum17488 scans: 22372
P02790	NGTGHGNSTHHGPEYMR	N7(Deamidated)	1640.000	2257.93	4	565.49	1851.77	0.000301783	0.133655	0.00026188	79	0.06701	0.001301	406.1587	HexNAc(2)	P02790_NGTGHGNSTHHGPEYMR_HexNAc(2)	File25307 Spectrum1557 scans: 5633
P02671	GSTGSWNSGSSGTGSTGNQNPGSPRPGSTGTWNPGSSER		3276.000	4155.82	4	1039.96	3749.63	0.0295315	7.10606	0.0011536	78	0.01796	0.001301	406.1587	HexNAc(2)	P02671_GSTGSWNSGSSGTGSTGNQNPGSPRPGSTGTWNPGSSER_HexNAc(2)	File25307 Spectrum10913 scans: 15467
P01861::P01859	NVDHKPSNTK	N1(Deamidated)	1805.000	1999.89	3	667.638	1139.56	0.0240011	12.0012	0.015576	77	0.1775	0.005448	859.3070	Hex(1)HexNAc(2)Neu5Ac(1)	P01861::P01859_NVDHKPSNTK_Hex(1)HexNAc(2)Neu5Ac(1)	File25307 Spectrum2487 scans: 6609
Q8N1X5	GNGDRPSAGATVGGEGQASQIGGGGGGGGGR		2915.000	3544.5	4	887.132	2597.19	-0.0183858	-5.18714	0.025665	77	0.1692	0.004673	947.3230	Hex(1)HexNAc(1)Neu5Ac(2)	Q8N1X5_GNGDRPSAGATVGGEGQASQIGGGGGGGGGR_Hex(1)HexNAc(1)Neu5Ac(2)	File25307 Spectrum8858 scans: 13309
P01860	VVTVPSSSLGTQTYTCNVNHKPSNTKVDK	C16(Carbamidomethyl);N19(Deamidated)	3997.000	3655.76	4	914.947	3161.57	0.0186019	5.08839	6.7198e-05	77	0.05336	0.001301	494.1748	HexNAc(1)Neu5Ac(1)	P01860_VVTVPSSSLGTQTYTCNVNHKPSNTKVDK_HexNAc(1)Neu5Ac(1)	File25307 Spectrum14893 scans: 19646
P01861	VVTVPSSSLGTKTYTCNVDHKPSNTKVDK	C16(Carbamidomethyl)	3997.000	3655.76	4	914.947	3161.6	-0.0177836	-4.86453	6.7198e-05	77	0.0828	0.001301	494.1748	HexNAc(1)Neu5Ac(1)	P01861_VVTVPSSSLGTKTYTCNVDHKPSNTKVDK_HexNAc(1)Neu5Ac(1)	File25307 Spectrum14893 scans: 19646
P02760	GCMGNGNNFVTEKECLQTCR	C2(Carbamidomethyl);C15(Carbamidomethyl);C19(Carbamidomethyl)	3055.000	2780.16	3	927.726	2373.99	0.00641637	2.30792	8.0426e-06	76	0.01638	0.001301	406.1587	HexNAc(2)	P02760_GCMGNGNNFVTEKECLQTCR_HexNAc(2)	File25307 Spectrum9675 scans: 14167
P08519	HYKYICAEHLARGTDSCQGDSGGPLVCFEK	C6(Carbamidomethyl);C17(Carbamidomethyl);Q18(Deamidated);C27(Carbamidomethyl)	4314.000	4314.86	4	1079.72	3455.53	0.0161998	3.75443	0.00090759	76	0.09906	0.001301	859.3070	Hex(1)HexNAc(2)Neu5Ac(1)	P08519_HYKYICAEHLARGTDSCQGDSGGPLVCFEK_Hex(1)HexNAc(2)Neu5Ac(1)	File25307 Spectrum16649 scans: 21492
P01860	CVVVDVSHEDPEVQFKWYVDGVEVHNAK	C1(Carbamidomethyl);Q14(Deamidated)	5270.000	3796.79	4	950.205	3284.54	0.053497	14.0901	0.00059499	76	0.09144	0.001301	511.1901	Fuc(1)Hex(1)HexNAc(1)	P01860_CVVVDVSHEDPEVQFKWYVDGVEVHNAK_Fuc(1)Hex(1)HexNAc(1)	File25307 Spectrum21817 scans: 27129
P17936	AYLLPAPPAPGNASESEEDRSAGSVESPSVSSTHR	N12(Deamidated)	4079.000	4209.89	4	1053.48	3552.66	0.00156225	0.37109	0.0047173	75	0.09634	0.001301	656.2276	Hex(1)HexNAc(1)Neu5Ac(1)	P17936_AYLLPAPPAPGNASESEEDRSAGSVESPSVSSTHR_Hex(1)HexNAc(1)Neu5Ac(1)	File25307 Spectrum15347 scans: 20123
Q16610	SSQHGPPFEGQSQVQPPPSQEATPLQQEK	Q3(Deamidated);Q15(Deamidated)	3297.000	4091.79	4	1023.95	3144.46	0.00349286	0.853626	0.027386	75	0.09354	0.001301	947.3230	Hex(1)HexNAc(1)Neu5Ac(2)	Q16610_SSQHGPPFEGQSQVQPPPSQEATPLQQEK_Hex(1)HexNAc(1)Neu5Ac(2)	File25307 Spectrum11024 scans: 15584
P01857	QTYICNVNHKPSNTK	C5(Carbamidomethyl);N8(Deamidated)	2488.000	2298.03	4	575.516	1803.86	0.00231205	1.0061	0.001495	75	0.1042	0.001301	494.1748	HexNAc(1)Neu5Ac(1)	P01857_QTYICNVNHKPSNTK_HexNAc(1)Neu5Ac(1)	File25307 Spectrum6367 scans: 10684
P02790	GHGNSTHHGPEYMR		1707.000	3402.34	4	851.592	1578.67	0.0181871	5.34546	0.0012557	75	0.0937	0.001301	1823.6453	Fuc(1)Hex(3)HexNAc(3)Neu5Ac(2)	P02790_GHGNSTHHGPEYMR_Fuc(1)Hex(3)HexNAc(3)Neu5Ac(2)	File25307 Spectrum1939 scans: 6034
P01009	PQGDAAQKTDTSHHDQDHPTFNK	Q7(Deamidated)	2494.000	3070.25	5	615.058	2575.13	-0.0579221	-18.8656	0.00059382	74	0.02678	0.001301	494.1748	HexNAc(1)Neu5Ac(1)	P01009_PQGDAAQKTDTSHHDQDHPTFNK_HexNAc(1)Neu5Ac(1)	File25307 Spectrum6402 scans: 10720
P01859	VVTVPSSNFGTQTYTCNVDHKPSNTKVDK	C16(Carbamidomethyl)	3883.000	3629.74	4	908.443	3222.56	0.0201843	5.56081	0.00019947	74	0.03063	0.001301	406.1587	HexNAc(2)	P01859_VVTVPSSNFGTQTYTCNVDHKPSNTKVDK_HexNAc(2)	File25307 Spectrum14266 scans: 18988
P00450	NKNNEGTYYSPNYNPQSR	N1(Deamidated)	2916.000	2349.04	3	784.02	2145.94	0.0238958	10.1726	0.0016941	73	0.02558	0.001301	203.0794	HexNAc(1)	P00450_NKNNEGTYYSPNYNPQSR_HexNAc(1)	File25307 Spectrum8863 scans: 13314
P51884	SSPNCAPECNCPESYPSAMYCDELK	C5(Carbamidomethyl);C9(Carbamidomethyl);C11(Carbamidomethyl);C21(Carbamidomethyl)	4048.000	3168.23	3	1057.08	2965.13	0.0189702	5.98762	8.7515e-05	72	0.02047	0.001301	203.0794	HexNAc(1)	P51884_SSPNCAPECNCPESYPSAMYCDELK_HexNAc(1)	File25307 Spectrum15175 scans: 19942
P02768	YLSVVLNQLCVLHEKTPVSDR	C10(Carbamidomethyl)	4892.000	3328.64	4	833.168	2469.3	0.0297147	8.92698	0.064504	72	0.2448	0.007557	859.3070	Hex(1)HexNAc(2)Neu5Ac(1)	P02768_YLSVVLNQLCVLHEKTPVSDR_Hex(1)HexNAc(2)Neu5Ac(1)	File25307 Spectrum19791 scans: 24878
P01860	TCPRCPEPKSCDTPPPCPR	C2(Carbamidomethyl);C5(Carbamidomethyl);C11(Carbamidomethyl);C17(Carbamidomethyl)	2614.000	3170.27	4	793.576	2311	-0.0295172	-9.3106	0.015029	72	0.2184	0.005448	859.3070	Hex(1)HexNAc(2)Neu5Ac(1)	P01860_TCPRCPEPKSCDTPPPCPR_Hex(1)HexNAc(2)Neu5Ac(1)	File25307 Spectrum7093 scans: 11446
P01834	LQSGNSQESVTEQDSK	Q2(Deamidated);N5(Deamidated);Q7(Deamidated)	2388.000	1942.85	3	648.623	1738.74	0.0265043	13.642	0.0083276	71	0.2359	0.005448	203.0794	HexNAc(1)	P01834_LQSGNSQESVTEQDSK_HexNAc(1)	File25307 Spectrum5798 scans: 10086
P01834	SGNSQESVTEQDSK		2214.000	2150.9	3	717.973	1494.64	0.0261612	12.1629	0.0032841	71	0.0404	0.001301	656.2276	Hex(1)HexNAc(1)Neu5Ac(1)	P01834_SGNSQESVTEQDSK_Hex(1)HexNAc(1)Neu5Ac(1)	File25307 Spectrum4803 scans: 9041
P05155	LAGDRASSNPNATSSSSQDPESLQDR		2717.000	3548.49	4	888.13	2689.22	-0.0356632	-10.0502	0.040379	71	0.1087	0.002571	859.3070	Hex(1)HexNAc(2)Neu5Ac(1)	P05155_LAGDRASSNPNATSSSSQDPESLQDR_Hex(1)HexNAc(2)Neu5Ac(1)	File25307 Spectrum7679 scans: 12071
P02671	TGSETESPRNPSSAGSWNSGSSGPGSTGNR	N10(Deamidated);N18(Deamidated)	2849.000	3421.49	4	856.38	2909.23	0.0671469	19.625	0.0012989	70	0.0273	0.001301	511.1901	Fuc(1)Hex(1)HexNAc(1)	P02671_TGSETESPRNPSSAGSWNSGSSGPGSTGNR_Fuc(1)Hex(1)HexNAc(1)	File25307 Spectrum8468 scans: 12899
P01877	QDVTVPCRVPPPPPCCHPR	C7(Carbamidomethyl);C15(Carbamidomethyl);C16(Carbamidomethyl)	3477.000	2924.32	4	732.088	2268.07	0.0226629	7.74981	0.030502	70	0.1213	0.004673	656.2276	Hex(1)HexNAc(1)Neu5Ac(1)	P01877_QDVTVPCRVPPPPPCCHPR_Hex(1)HexNAc(1)Neu5Ac(1)	File25307 Spectrum12019 scans: 16628
P01859	VTVPSSNFGTQTYTCNVDHKPSNTK	C15(Carbamidomethyl)	3936.000	3293.49	5	659.706	2781.3	-0.00165822	-0.503483	0.000271	69	0.03718	0.001301	511.1901	Fuc(1)Hex(1)HexNAc(1)	P01859_VTVPSSNFGTQTYTCNVDHKPSNTK_Fuc(1)Hex(1)HexNAc(1)	File25307 Spectrum14557 scans: 19293
P02671	SFRPDSPGSGNARPNNPDWGTFEEVSGNVSPGTR	N15(Deamidated);N16(Deamidated)	3854.000	4084.84	5	817.974	3589.61	0.0480183	11.7553	0.30983	68	0.2293	0.005448	494.1748	HexNAc(1)Neu5Ac(1)	P02671_SFRPDSPGSGNARPNNPDWGTFEEVSGNVSPGTR_HexNAc(1)Neu5Ac(1)	File25307 Spectrum14103 scans: 18817
P01861	PPSQEEMTKNQVSLTCLVKGFYPSDIAVEWESNGQPENNYK	M7(Oxidation);Q11(Deamidated);C16(Carbamidomethyl)	4673.000	4934.28	3	1645.77	4730.18	0.0218489	4.42798	0.00020088	67	0.0278	0.001301	203.0794	HexNAc(1)	P01861_PPSQEEMTKNQVSLTCLVKGFYPSDIAVEWESNGQPENNYK_HexNAc(1)	File25307 Spectrum18623 scans: 23567
P02751	TTQNYDADQK		2247.000	2130.88	3	711.301	1182.52	0.0394063	18.493	0.016937	66	0.2149	0.005448	947.3230	Hex(1)HexNAc(1)Neu5Ac(2)	P02751_TTQNYDADQK_Hex(1)HexNAc(1)Neu5Ac(2)	File25307 Spectrum4995 scans: 9243
P0C0L5::P0C0L4	AVSPTPAPR		2332.000	1841.82	3	614.947	894.492	0.00265486	1.44143	0.014085	66	0.1459	0.004673	947.3230	Hex(1)HexNAc(1)Neu5Ac(2)	P0C0L5::P0C0L4_AVSPTPAPR_Hex(1)HexNAc(1)Neu5Ac(2)	File25307 Spectrum5479 scans: 9751
P02671	RMELERPGGNEITRGGSTSYGTGSETESPR	N10(Deamidated)	3360.000	4071.78	4	1018.95	3211.48	-0.00577093	-1.4173	0.011444	66	0.1381	0.004673	859.3070	Hex(1)HexNAc(2)Neu5Ac(1)	P02671_RMELERPGGNEITRGGSTSYGTGSETESPR_Hex(1)HexNAc(2)Neu5Ac(1)	File25307 Spectrum11375 scans: 15952
P04217	PSATVTIEELAAPPPPVLMHHGESSQVLHPGNK	M19(Oxidation)	4585.000	4315.11	5	864.029	3455.75	0.0533787	12.3702	0.050192	66	0.2455	0.008603	859.3070	Hex(1)HexNAc(2)Neu5Ac(1)	P04217_PSATVTIEELAAPPPPVLMHHGESSQVLHPGNK_Hex(1)HexNAc(2)Neu5Ac(1)	File25307 Spectrum18144 scans: 23061
P07225	NINGGCSQICDNTPGSYHCSCK	C6(Carbamidomethyl);C10(Carbamidomethyl);C19(Carbamidomethyl);C21(Carbamidomethyl)	2679.000	2893.11	3	965.379	2527.99	-0.0122402	-4.23081	0.0010946	65	0.06001	0.001301	365.1322	Hex(1)HexNAc(1)	P07225_NINGGCSQICDNTPGSYHCSCK_Hex(1)HexNAc(1)	File25307 Spectrum7462 scans: 11843
P01860	DTTHTCPRCPEPKSCDTPPPCPR	C6(Carbamidomethyl);C9(Carbamidomethyl);C15(Carbamidomethyl);C21(Carbamidomethyl)	2639.000	3171.28	4	793.828	2765.18	-0.0540291	-17.037	0.03152	65	0.2459	0.008603	406.1587	HexNAc(2)	P01860_DTTHTCPRCPEPKSCDTPPPCPR_HexNAc(2)	File25307 Spectrum7232 scans: 11592
P01834	LQSGNSQESVTEQDSK		2738.000	2229.93	3	744.317	1735.79	-0.0328803	-14.745	0.024577	64	0.1279	0.004673	494.1748	HexNAc(1)Neu5Ac(1)	P01834_LQSGNSQESVTEQDSK_HexNAc(1)Neu5Ac(1)	File25307 Spectrum7805 scans: 12203
P01857	VLQSSGLYSLSSVVTVPSSSLGTQTYICNVNHKPSNTKVDK	Q3(Deamidated);C28(Carbamidomethyl);N29(Deamidated);N31(Deamidated)	4131.000	4909.42	5	982.89	4397.19	0.0283223	5.76898	0.0082919	63	0.1797	0.005448	511.1901	Fuc(1)Hex(1)HexNAc(1)	P01857_VLQSSGLYSLSSVVTVPSSSLGTQTYICNVNHKPSNTKVDK_Fuc(1)Hex(1)HexNAc(1)	File25307 Spectrum15636 scans: 20426
Q68DE3	SSLSDQMDHPDFSSEN	Q6(Deamidated)	2261.000	2289.9	2	1145.96	1795.68	0.0375591	16.4021	0.072545	63	0.2323	0.005448	494.1748	HexNAc(1)Neu5Ac(1)	Q68DE3_SSLSDQMDHPDFSSEN_HexNAc(1)Neu5Ac(1)	File25307 Spectrum5069 scans: 9321
P04196	TKPPFKPHGSR		1647.000	2198.02	4	550.512	1250.69	0.00870433	3.96008	0.21996	63	0.2114	0.005448	947.3230	Hex(1)HexNAc(1)Neu5Ac(2)	P04196_TKPPFKPHGSR_Hex(1)HexNAc(1)Neu5Ac(2)	File25307 Spectrum1597 scans: 5675
P02671	QNPGSPRPGSTGTWNPGSSER	Q1(Deamidated)	2973.000	3993.71	5	799.748	2168.98	0.0734271	18.3857	0.24227	62	0.2077	0.005448	1823.6453	Fuc(1)Hex(3)HexNAc(3)Neu5Ac(2)	P02671_QNPGSPRPGSTGTWNPGSSER_Fuc(1)Hex(3)HexNAc(3)Neu5Ac(2)	File25307 Spectrum9197 scans: 13665
P01857	SVVTVPSSSLGTQTYICNVNHKPSNTK	Q13(Deamidated);C17(Carbamidomethyl);N20(Deamidated)	4181.000	3285.62	4	822.412	2919.43	0.0566238	17.2338	0.020303	62	0.2068	0.005448	365.1322	Hex(1)HexNAc(1)	P01857_SVVTVPSSSLGTQTYICNVNHKPSNTK_Hex(1)HexNAc(1)	File25307 Spectrum15915 scans: 20719
P05155	PNATSSSSQDPESLQDRGEGK		2237.000	2683.12	3	895.379	2188.98	-0.0419766	-15.6447	0.0065971	61	0.1259	0.004673	494.1748	HexNAc(1)Neu5Ac(1)	P05155_PNATSSSSQDPESLQDRGEGK_HexNAc(1)Neu5Ac(1)	File25307 Spectrum4935 scans: 9180
Q8NFZ3	LMTYVQDQNEDCLYLNIYVPMEDDIHEQNSK	M2(Oxidation);C12(Carbamidomethyl);M21(Oxidation);N29(Deamidated)	2701.000	4361.91	4	1091.48	3849.67	0.0447528	10.2599	0.025263	60	0.1874	0.005448	511.1901	Fuc(1)Hex(1)HexNAc(1)	Q8NFZ3_LMTYVQDQNEDCLYLNIYVPMEDDIHEQNSK_Fuc(1)Hex(1)HexNAc(1)	File25307 Spectrum7590 scans: 11977
Q9Y490	ENFQVGSMPPAQQQITSGQMHR	N2(Deamidated)	3156.000	2983.37	3	995.464	2471.13	0.0462251	15.4943	0.028757	60	0.1796	0.005448	511.1901	Fuc(1)Hex(1)HexNAc(1)	Q9Y490_ENFQVGSMPPAQQQITSGQMHR_Fuc(1)Hex(1)HexNAc(1)	File25307 Spectrum10249 scans: 14770
P02790	NGTGHGNSTHHGPEYMR	N7(Deamidated)	1636.000	2054.85	4	514.72	1851.77	0.00120178	0.584852	0.0023037	59	0.1084	0.002571	203.0794	HexNAc(1)	P02790_NGTGHGNSTHHGPEYMR_HexNAc(1)	File25307 Spectrum1534 scans: 5609
P01861	PEVTCVVVDVSQEDPEVQFNWYVDGVEVHNAK	C5(Carbamidomethyl);Q12(Deamidated);N20(Deamidated);N30(Deamidated)	4211.000	4200.79	5	841.165	3689.67	-0.0754215	-17.9541	0.01194	59	0.1988	0.005448	511.1901	Fuc(1)Hex(1)HexNAc(1)	P01861_PEVTCVVVDVSQEDPEVQFNWYVDGVEVHNAK_Fuc(1)Hex(1)HexNAc(1)	File25307 Spectrum16080 scans: 20893
P04264	GSSYGSGGGSYGSGGGGGGHGSYGSGSSSGGYR		2552.000	3314.31	3	1105.78	2803.11	0.0139011	4.19426	0.00038153	58	0.03328	0.001301	511.1901	Fuc(1)Hex(1)HexNAc(1)	P04264_GSSYGSGGGSYGSGGGGGGHGSYGSGSSSGGYR_Fuc(1)Hex(1)HexNAc(1)	File25307 Spectrum6738 scans: 11073
O75882	DRCDQHTDCYSCTANTNDCHWCNDHCVPR	C3(Carbamidomethyl);Q5(Deamidated);C9(Carbamidomethyl);C12(Carbamidomethyl);N15(Deamidated);N17(Deamidated);C19(Carbamidomethyl);C22(Carbamidomethyl);C26(Carbamidomethyl)	2633.000	4251.58	6	709.603	3756.32	0.0743419	17.4857	0.00069375	58	0.02412	0.001301	494.1748	HexNAc(1)Neu5Ac(1)	O75882_DRCDQHTDCYSCTANTNDCHWCNDHCVPR_HexNAc(1)Neu5Ac(1)	File25307 Spectrum7199 scans: 11557
P02790	PLPPTSAHGNVAEGETKPDPDVTER		3145.000	3124.45	4	782.121	2613.27	-0.00227951	-0.729572	0.010425	58	0.1197	0.004673	511.1901	Fuc(1)Hex(1)HexNAc(1)	P02790_PLPPTSAHGNVAEGETKPDPDVTER_Fuc(1)Hex(1)HexNAc(1)	File25307 Spectrum10181 scans: 14699
P01861	TKTYTCNVDHKPSNTKVDK	C6(Carbamidomethyl)	2341.000	2439.15	3	814.057	2235.1	-0.0299786	-12.2906	0.001949	57	0.2412	0.006488	203.0794	HexNAc(1)	P01861_TKTYTCNVDHKPSNTKVDK_HexNAc(1)	File25307 Spectrum5534 scans: 9809
Q9UJJ9	TRPTETSNLEHLGHETPR		2640.000	2730.25	4	683.569	2074.02	0.00011499	0.042117	0.0033827	57	0.082	0.001301	656.2276	Hex(1)HexNAc(1)Neu5Ac(1)	Q9UJJ9_TRPTETSNLEHLGHETPR_Hex(1)HexNAc(1)Neu5Ac(1)	File25307 Spectrum7241 scans: 11601
P01859	TQTYTCNVDHKPSNTKVDK	C6(Carbamidomethyl)	2341.000	2439.15	3	814.057	2235.06	0.00640688	2.62669	0.001949	57	0.1426	0.004673	203.0794	HexNAc(1)	P01859_TQTYTCNVDHKPSNTKVDK_HexNAc(1)	File25307 Spectrum5534 scans: 9809
P01860	TQTYTCNVNHKPSNTKVDK	C6(Carbamidomethyl);N9(Deamidated)	2341.000	2439.15	3	814.057	2235.06	0.00640688	2.62669	0.001949	57	0.1426	0.004673	203.0794	HexNAc(1)	P01860_TQTYTCNVNHKPSNTKVDK_HexNAc(1)	File25307 Spectrum5534 scans: 9809
P02790	TSAHGNVAEGETKPDPDVTER		2416.000	2865.25	4	717.32	2209.02	0.000176054	0.0614447	0.0061745	56	0.05212	0.001301	656.2276	Hex(1)HexNAc(1)Neu5Ac(1)	P02790_TSAHGNVAEGETKPDPDVTER_Hex(1)HexNAc(1)Neu5Ac(1)	File25307 Spectrum5959 scans: 10255
P01876	VPCPVPSTPPTPSPSTPPTPSPSCCHPR	C3(Carbamidomethyl);C24(Carbamidomethyl);C25(Carbamidomethyl)	3757.000	3358.52	4	840.636	2993.38	-0.000288405	-0.0858727	0.089253	54	0.1586	0.004673	365.1322	Hex(1)HexNAc(1)	P01876_VPCPVPSTPPTPSPSTPPTPSPSCCHPR_Hex(1)HexNAc(1)	File25307 Spectrum13572 scans: 18259
P02790	IATPLPPTSAHGNVAEGETKPDPDVTER		2816.000	3758.68	3	1253.9	2898.44	-0.067628	-17.9925	0.00060416	53	0.05536	0.001301	859.3070	Hex(1)HexNAc(2)Neu5Ac(1)	P02790_IATPLPPTSAHGNVAEGETKPDPDVTER_Hex(1)HexNAc(2)Neu5Ac(1)	File25307 Spectrum8269 scans: 12690
P01009	QGDAAQKTDTSHHDQDHPTFNK	Q1(Deamidated);Q6(Deamidated)	2204.000	2886.18	4	722.553	2479.06	-0.0402973	-13.9621	0.00032429	52	0.08241	0.001301	406.1587	HexNAc(2)	P01009_QGDAAQKTDTSHHDQDHPTFNK_HexNAc(2)	File25307 Spectrum4744 scans: 8979
P02671	GSTGSWNSGSSGTGSTGNQNPGSPRPGSTGTWNPGSSER	N7(Deamidated)	3012.000	4406.91	5	882.389	3750.61	0.0708394	16.0746	0.09216	50	0.09937	0.001301	656.2276	Hex(1)HexNAc(1)Neu5Ac(1)	P02671_GSTGSWNSGSSGTGSTGNQNPGSPRPGSTGTWNPGSSER_Hex(1)HexNAc(1)Neu5Ac(1)	File25307 Spectrum9427 scans: 13907
B9A064	SHRSYSCQVTHEGSTVEK	C7(Carbamidomethyl);Q8(Deamidated)	2590.000	2458.07	4	615.524	2091.93	0.00424459	1.7268	0.00076086	49	0.1901	0.005448	365.1322	Hex(1)HexNAc(1)	B9A064_SHRSYSCQVTHEGSTVEK_Hex(1)HexNAc(1)	File25307 Spectrum6960 scans: 11306
P02768	AEDYLSVVLNQLCVLHEK	N10(Deamidated);C13(Carbamidomethyl)	5016.000	2536.22	3	846.413	2130.07	-0.0076356	-3.01062	0.080909	49	0.234	0.005448	406.1587	HexNAc(2)	P02768_AEDYLSVVLNQLCVLHEK_HexNAc(2)	File25307 Spectrum20454 scans: 25606
Q9UJU2	YSGYIMMPNMNNDPYMSNGSLSPPIPR	M6(Oxidation);M7(Oxidation);N11(Deamidated)	3357.000	3937.67	6	657.286	3078.32	0.0415911	10.5624	0.10882	45	0.09081	0.001301	859.3070	Hex(1)HexNAc(2)Neu5Ac(1)	Q9UJU2_YSGYIMMPNMNNDPYMSNGSLSPPIPR_Hex(1)HexNAc(2)Neu5Ac(1)	File25307 Spectrum11357 scans: 15933
P01009	PQGDAAQKTDTSHHDQDHPTFNK		1991.000	2980.28	3	994.433	2574.15	-0.0286849	-9.6249	0.047749	43	0.1436	0.004673	406.1587	HexNAc(2)	P01009_PQGDAAQKTDTSHHDQDHPTFNK_HexNAc(2)	File25307 Spectrum3541 scans: 7716
P0DMB2	MQAFSQGLNEQQQQQSPVK	M1(Oxidation);Q13(Deamidated)	1921.000	2686.2	4	672.558	2192.02	0.0120982	4.50383	0.0087036	38	0.1632	0.004673	494.1748	HexNAc(1)Neu5Ac(1)	P0DMB2_MQAFSQGLNEQQQQQSPVK_HexNAc(1)Neu5Ac(1)	File25307 Spectrum3132 scans: 7287
P02671	SGSSGTGSTGNQNPGSPRPGSTGTWNPGSSER		2822.000	3717.59	3	1240.2	3060.35	0.00374254	1.00671	3.1989	33	0.24	0.006488	656.2276	Hex(1)HexNAc(1)Neu5Ac(1)	P02671_SGSSGTGSTGNQNPGSPRPGSTGTWNPGSSER_Hex(1)HexNAc(1)Neu5Ac(1)	File25307 Spectrum8305 scans: 12728
P59046	YMLYLLSLMQPKPGAPRLQPPPNQR	Q10(Deamidated);N23(Deamidated);Q24(Deamidated)	1673.000	3857.89	7	552.134	2910.51	0.0490727	12.7201	2.2786	32	0.09354	0.001301	947.3230	Hex(1)HexNAc(1)Neu5Ac(2)	P59046_YMLYLLSLMQPKPGAPRLQPPPNQR_Hex(1)HexNAc(1)Neu5Ac(2)	File25307 Spectrum1747 scans: 5832
Q9Y2J2	LLGSYTVQSELGDYDPDECGSDYISEFRFAPNHTK	Q8(Deamidated);C19(Carbamidomethyl)	3310.000	4214.8	7	603.121	4010.78	-0.0619617	-14.701	10.684	27	0.2476	0.009642	203.0794	HexNAc(1)	Q9Y2J2_LLGSYTVQSELGDYDPDECGSDYISEFRFAPNHTK_HexNAc(1)	File25307 Spectrum11095 scans: 15658
Q2M2H8	TSTGFTAQLKRLPSPSLFGNDVATTLFTAEYQTSNR	N35(Deamidated);N20(Deamidated);Q32(Deamidated)	2711.000	4870.18	7	696.747	3921.93	-0.0715465	-14.6907	39.459	23	0.1826	0.005448	947.3230	Hex(1)HexNAc(1)Neu5Ac(2)	Q2M2H8_TSTGFTAQLKRLPSPSLFGNDVATTLFTAEYQTSNR_Hex(1)HexNAc(1)Neu5Ac(2)	File25307 Spectrum7644 scans: 12034
O43653	GCSLNCVDDSQDYYVGKKNITCCDTDLCNASGAHALQ	C2(Carbamidomethyl);N5(Deamidated);Q37(Deamidated);C6(Carbamidomethyl);C22(Carbamidomethyl);C23(Carbamidomethyl);C28(Carbamidomethyl)	1666.000	4721.94	8	591.25	4210.73	0.0194449	4.11798	3.786	21	0.2412	0.006488	511.1901	Fuc(1)Hex(1)HexNAc(1)	O43653_GCSLNCVDDSQDYYVGKKNITCCDTDLCNASGAHALQ_Fuc(1)Hex(1)HexNAc(1)	File25307 Spectrum1709 scans: 5792
P0C0L5::P0C0L4	QDIQQNTDGSGQVSIPIIIPQTISELQLSVSAGSPHPAIAR	Q5(Deamidated);Q12(Deamidated)	5012.000	4778.42	3	1593.81	4267.2	0.0286607	5.99794	1.1083e-15	159	9.89e-05	0.00182	511.1901	Fuc(1)Hex(1)HexNAc(1)	P0C0L5::P0C0L4_QDIQQNTDGSGQVSIPIIIPQTISELQLSVSAGSPHPAIAR_Fuc(1)Hex(1)HexNAc(1)	File25311 Spectrum19914 scans: 25484
P04004	FEDGVLDPDYPRNISDGFDGIPDNVDAALALPAHSY	N13(Deamidated)	4942.000	4824.03	3	1609.02	3875.78	-0.0751421	-15.5766	9.6957e-13	152	0.000146	0.00182	947.3230	Hex(1)HexNAc(1)Neu5Ac(2)	P04004_FEDGVLDPDYPRNISDGFDGIPDNVDAALALPAHSY_Hex(1)HexNAc(1)Neu5Ac(2)	File25311 Spectrum19538 scans: 25072
P0C0L5	DLRGVAHNNLMAMAQETGDNLYWGSVTGSQSNAVSPTPAPR	N9(Deamidated);M11(Oxidation);M13(Oxidation)	4715.000	4857.15	4	1215.3	4345.01	-0.0536713	-11.05	7.2647e-15	148	0.0002384	0.00182	511.1901	Fuc(1)Hex(1)HexNAc(1)	P0C0L5_DLRGVAHNNLMAMAQETGDNLYWGSVTGSQSNAVSPTPAPR_Fuc(1)Hex(1)HexNAc(1)	File25311 Spectrum18335 scans: 23721
P01591	PTEVELDNQIVTATQSNICDEDSATETCYTYDR	C19(Carbamidomethyl);C28(Carbamidomethyl)	4564.000	4243.82	3	1415.61	3837.65	0.0172476	4.06416	1.014e-11	145	8.77e-05	0.00182	406.1587	HexNAc(2)	P01591_PTEVELDNQIVTATQSNICDEDSATETCYTYDR_HexNAc(2)	File25311 Spectrum17508 scans: 22846
P05155	SNPNATSSSSQDPESLQDRGEGK	N2(Deamidated)	2595.000	3251.35	3	1084.79	2391.04	0.00148327	0.4562	1.8562e-10	141	0.0009249	0.00182	859.3070	Hex(1)HexNAc(2)Neu5Ac(1)	P05155_SNPNATSSSSQDPESLQDRGEGK_Hex(1)HexNAc(2)Neu5Ac(1)	File25311 Spectrum6486 scans: 11261
Q14624	SRVMNMKIEETTMTTQTPAPIQAPSAILPLPGQSVER	N5(Deamidated);M13(Oxidation)	4910.000	4550.15	4	1138.55	4039.04	-0.0792291	-17.4124	5.2114e-12	137	4.479e-05	0.00182	511.1901	Fuc(1)Hex(1)HexNAc(1)	Q14624_SRVMNMKIEETTMTTQTPAPIQAPSAILPLPGQSVER_Fuc(1)Hex(1)HexNAc(1)	File25311 Spectrum19366 scans: 24887
P02774	ACCAEGADPDCYDTRTSALSAKSCESNSPFPVHPGTAECCTK	C2(Carbamidomethyl);C3(Carbamidomethyl);C39(Carbamidomethyl);C40(Carbamidomethyl);C11(Carbamidomethyl);C24(Carbamidomethyl)	3221.000	4868.08	3	1623.7	4663.91	0.0873208	17.9374	1.4112e-11	135	0.001246	0.00182	203.0794	HexNAc(1)	P02774_ACCAEGADPDCYDTRTSALSAKSCESNSPFPVHPGTAECCTK_HexNAc(1)	File25311 Spectrum10110 scans: 15078
O75882	NSSDTVECECSENWKGEACDIPHCTDNCGFPHR	N1(Deamidated);C8(Carbamidomethyl);C10(Carbamidomethyl);C19(Carbamidomethyl);C24(Carbamidomethyl);C28(Carbamidomethyl)	3555.000	4171.65	4	1043.92	3968.52	0.0509748	12.2193	2.7147e-08	128	0.008716	0.00182	203.0794	HexNAc(1)	O75882_NSSDTVECECSENWKGEACDIPHCTDNCGFPHR_HexNAc(1)	File25311 Spectrum11947 scans: 17007
P02655	TQQPQQDEMPSPTFLTQVK		4712.000	2858.29	3	953.77	2202.06	-0.00301287	-1.05408	1.8433e-10	127	0.004633	0.00182	656.2276	Hex(1)HexNAc(1)Neu5Ac(1)	P02655_TQQPQQDEMPSPTFLTQVK_Hex(1)HexNAc(1)Neu5Ac(1)	File25311 Spectrum18318 scans: 23703
B9A064	QWKSHRSYSCQVTHEGSTVEK	Q1(Deamidated);C10(Carbamidomethyl)	2706.000	3190.34	3	1064.45	2534.16	-0.0524638	-16.4446	1.1286e-10	126	0.000862	0.00182	656.2276	Hex(1)HexNAc(1)Neu5Ac(1)	B9A064_QWKSHRSYSCQVTHEGSTVEK_Hex(1)HexNAc(1)Neu5Ac(1)	File25311 Spectrum7112 scans: 11930
P06396	EEGTEPEAMLQVLGPKPALPAGTEDTAKEDAANR	M9(Oxidation)	4531.000	3956.94	5	792.395	3550.71	0.071696	18.1191	1.2375e-11	123	0.0003182	0.00182	406.1587	HexNAc(2)	P06396_EEGTEPEAMLQVLGPKPALPAGTEDTAKEDAANR_HexNAc(2)	File25311 Spectrum17330 scans: 22659
P0C0L4	PVDLLGVAHNNLMAMAQETGDNLYWGSVTGSQSNAVSPTPAPR	N10(Deamidated);N11(Deamidated);N22(Deamidated)	4349.000	4962.21	4	1241.56	4468.1	-0.0550353	-11.0909	8.0961e-09	112	0.005142	0.00182	494.1748	HexNAc(1)Neu5Ac(1)	P0C0L4_PVDLLGVAHNNLMAMAQETGDNLYWGSVTGSQSNAVSPTPAPR_HexNAc(1)Neu5Ac(1)	File25311 Spectrum16329 scans: 21608
P01023	VPGHVTVSICRKYSDASDCHGEDSQAFCEK	C10(Carbamidomethyl);C19(Carbamidomethyl);C28(Carbamidomethyl)	2220.000	4298.77	3	1433.93	3438.5	-0.0468205	-10.8916	2.1475e-05	112	0.01776	0.00182	859.3070	Hex(1)HexNAc(2)Neu5Ac(1)	P01023_VPGHVTVSICRKYSDASDCHGEDSQAFCEK_Hex(1)HexNAc(2)Neu5Ac(1)	File25311 Spectrum4327 scans: 8994
P02768	ECCEKPLLEKSHCIAEVENDEMPADLPSLAADFVESK	C2(Carbamidomethyl);C3(Carbamidomethyl);C13(Carbamidomethyl)	4658.000	4667.19	5	934.445	4259.94	0.0879519	18.8447	1.1177e-07	104	0.02389	0.00182	406.1587	HexNAc(2)	P02768_ECCEKPLLEKSHCIAEVENDEMPADLPSLAADFVESK_HexNAc(2)	File25311 Spectrum18026 scans: 23391
P01704	PGQSITISCTGTSSDVGGYNYVSWYQQHPGK	C9(Carbamidomethyl)	4375.000	3779.71	3	1260.91	3373.53	0.0236013	6.24419	1.3569e-08	99	0.001087	0.00182	406.1587	HexNAc(2)	P01704_PGQSITISCTGTSSDVGGYNYVSWYQQHPGK_HexNAc(2)	File25311 Spectrum16471 scans: 21757
P07996	CWPSDSADDGWSPWSEWTSCSTSCGNGIQQR	C1(Carbamidomethyl);C20(Carbamidomethyl);C24(Carbamidomethyl);N26(Deamidated)	1947.000	4260.6	5	853.128	3604.4	-0.0220276	-5.17008	4.8339e-07	95	0.006339	0.00182	656.2276	Hex(1)HexNAc(1)Neu5Ac(1)	P07996_CWPSDSADDGWSPWSEWTSCSTSCGNGIQQR_Hex(1)HexNAc(1)Neu5Ac(1)	File25311 Spectrum2762 scans: 7350
P02774	YDTRTSALSAKSCESNSPFPVHPGTAECCTK	C13(Carbamidomethyl);C28(Carbamidomethyl);C29(Carbamidomethyl)	3216.000	4113.79	4	1029.45	3457.53	0.0276059	6.71057	3.0378e-06	92	0.008064	0.00182	656.2276	Hex(1)HexNAc(1)Neu5Ac(1)	P02774_YDTRTSALSAKSCESNSPFPVHPGTAECCTK_Hex(1)HexNAc(1)Neu5Ac(1)	File25311 Spectrum10082 scans: 15049
Q14624	IPKPEASFSPR		3388.000	2174.99	3	726.005	1227.66	0.0104986	4.82695	0.00020906	92	0.1086	0.003423	947.3230	Hex(1)HexNAc(1)Neu5Ac(2)	Q14624_IPKPEASFSPR_Hex(1)HexNAc(1)Neu5Ac(2)	File25311 Spectrum11030 scans: 16044
P02671	NSGSSGPGSTGNR		2427.000	2035.86	3	679.626	1176.51	0.037229	18.2866	0.00063539	91	0.08984	0.00182	859.3070	Hex(1)HexNAc(2)Neu5Ac(1)	P02671_NSGSSGPGSTGNR_Hex(1)HexNAc(2)Neu5Ac(1)	File25311 Spectrum5519 scans: 10245
P02790	IATPLPPTSAHGNVAEGETKPDPDVTER		3020.000	4722	4	1181.51	2898.44	-0.0835358	-17.6908	0.00015276	90	0.09574	0.00182	1823.6453	Fuc(1)Hex(3)HexNAc(3)Neu5Ac(2)	P02790_IATPLPPTSAHGNVAEGETKPDPDVTER_Fuc(1)Hex(3)HexNAc(3)Neu5Ac(2)	File25311 Spectrum8978 scans: 13890
P02671	SGIGTLDGFRHRHPDEAAFFDTASTGK		3030.000	4713.01	5	943.608	2889.38	-0.0196004	-4.15879	0.00044608	87	0.09732	0.00182	1823.6453	Fuc(1)Hex(3)HexNAc(3)Neu5Ac(2)	P02671_SGIGTLDGFRHRHPDEAAFFDTASTGK_Fuc(1)Hex(3)HexNAc(3)Neu5Ac(2)	File25311 Spectrum9041 scans: 13956
P0C0L5::P0C0L4	AQETGDNLYWGSVTGSQSNAVSPTPAPR	N7(Deamidated)	2687.000	3547.5	4	887.883	2890.34	-0.0661187	-18.6381	0.00015842	83	0.03225	0.00182	656.2276	Hex(1)HexNAc(1)Neu5Ac(1)	P0C0L5::P0C0L4_AQETGDNLYWGSVTGSQSNAVSPTPAPR_Hex(1)HexNAc(1)Neu5Ac(1)	File25311 Spectrum7008 scans: 11821
P05155	SNPNATSSSSQDPESLQDR		2707.000	2878.19	3	960.403	2018.88	0.00275111	0.955848	6.9614e-05	83	0.05477	0.00182	859.3070	Hex(1)HexNAc(2)Neu5Ac(1)	P05155_SNPNATSSSSQDPESLQDR_Hex(1)HexNAc(2)Neu5Ac(1)	File25311 Spectrum7122 scans: 11940
Q9Y248	SPYYMELTKLLLNHASDNIPK	M5(Oxidation)	3074.000	2956.38	5	592.284	2462.25	-0.0452292	-15.2988	0.0012547	79	0.1746	0.004562	494.1748	HexNAc(1)Neu5Ac(1)	Q9Y248_SPYYMELTKLLLNHASDNIPK_HexNAc(1)Neu5Ac(1)	File25311 Spectrum9285 scans: 14212
P02790	AEGETKPDPDVTER		2173.000	1949.91	3	650.976	1542.72	0.0293216	15.0374	0.00038753	79	0.08618	0.00182	406.1587	HexNAc(2)	P02790_AEGETKPDPDVTER_HexNAc(2)	File25311 Spectrum4060 scans: 8713
P04196	SCQHATFGTNGAQR	C2(Carbamidomethyl);Q3(Deamidated);N10(Deamidated)	2132.000	1900.74	3	634.587	1535.64	-0.0338333	-17.8001	0.00013586	78	0.04416	0.00182	365.1322	Hex(1)HexNAc(1)	P04196_SCQHATFGTNGAQR_Hex(1)HexNAc(1)	File25311 Spectrum3821 scans: 8462
P01861	VVTVPSSSLGTKTYTCNVDHKPSNTK	C16(Carbamidomethyl)	4072.000	3314.54	4	829.643	2819.41	-0.0467322	-14.0991	0.00060512	77	0.05103	0.00182	494.1748	HexNAc(1)Neu5Ac(1)	P01861_VVTVPSSSLGTKTYTCNVDHKPSNTK_HexNAc(1)Neu5Ac(1)	File25311 Spectrum14795 scans: 19998
P02768	VNEVTEFAKTCVADESAENCDK	N2(Deamidated);C11(Carbamidomethyl);C20(Carbamidomethyl)	1845.000	3027.26	4	757.822	2516.07	0.00249533	0.824288	0.00013289	76	0.0304	0.00182	511.1901	Fuc(1)Hex(1)HexNAc(1)	P02768_VNEVTEFAKTCVADESAENCDK_Fuc(1)Hex(1)HexNAc(1)	File25311 Spectrum2175 scans: 6734
P02671	SGTGSTGNQNPGSPRPGSTGTWNPGSSER		2735.000	3194.43	4	799.616	2829.27	0.0356553	11.1617	0.00033913	74	0.05018	0.00182	365.1322	Hex(1)HexNAc(1)	P02671_SGTGSTGNQNPGSPRPGSTGTWNPGSSER_Hex(1)HexNAc(1)	File25311 Spectrum7285 scans: 12111
P02790	CWSLAIATPLPPTSAHGNVAEGETKPDPDVTER	C1(Carbamidomethyl);N18(Deamidated)	2913.000	4010.78	3	1337.93	3516.68	-0.0774423	-19.3085	0.00012847	73	0.01828	0.00182	494.1748	HexNAc(1)Neu5Ac(1)	P02790_CWSLAIATPLPPTSAHGNVAEGETKPDPDVTER_HexNAc(1)Neu5Ac(1)	File25311 Spectrum8352 scans: 13232
P02768	CADDRADLAKYICENQDSISSK	C1(Carbamidomethyl);C13(Carbamidomethyl)	3200.000	2923.22	2	1462.62	2558.14	-0.0542687	-18.5647	1.9406e-05	72	0.01909	0.00182	365.1322	Hex(1)HexNAc(1)	P02768_CADDRADLAKYICENQDSISSK_Hex(1)HexNAc(1)	File25311 Spectrum9990 scans: 14952
A0M8Q6	CRVTHEGSTVEK	C1(Carbamidomethyl)	2306.000	1767.78	2	884.896	1401.67	-0.0242837	-13.7368	0.00043336	72	0.1666	0.004562	365.1322	Hex(1)HexNAc(1)	A0M8Q6_CRVTHEGSTVEK_Hex(1)HexNAc(1)	File25311 Spectrum4818 scans: 9509
P08519	VTESSVLATSTAVSEQAPTEQSPTVQDCYHGDGQSYR	C28(Carbamidomethyl)	4617.000	4844.14	3	1615.72	3984.79	0.0458228	9.45943	0.0084989	72	0.1902	0.004562	859.3070	Hex(1)HexNAc(2)Neu5Ac(1)	P08519_VTESSVLATSTAVSEQAPTEQSPTVQDCYHGDGQSYR_Hex(1)HexNAc(2)Neu5Ac(1)	File25311 Spectrum17800 scans: 23153
P04003	TQHRKSRPANHCVYFYGDEISFSCHETSR	Q2(Deamidated);N10(Deamidated);C12(Carbamidomethyl);C24(Carbamidomethyl)	3454.000	4064.68	4	1017.18	3570.58	-0.0696392	-17.1327	0.0062283	72	0.1193	0.003423	494.1748	HexNAc(1)Neu5Ac(1)	P04003_TQHRKSRPANHCVYFYGDEISFSCHETSR_HexNAc(1)Neu5Ac(1)	File25311 Spectrum11390 scans: 16422
Q9UGM5	KFVSVTCDFFESQAPATGSENSAVNQKPTNLPKVEESQQK	C7(Carbamidomethyl);Q26(Deamidated)	4261.000	4938.28	4	1235.58	4427.12	-0.0279303	-5.65586	0.018876	71	0.1415	0.004562	511.1901	Fuc(1)Hex(1)HexNAc(1)	Q9UGM5_KFVSVTCDFFESQAPATGSENSAVNQKPTNLPKVEESQQK_Fuc(1)Hex(1)HexNAc(1)	File25311 Spectrum15838 scans: 21093
P01834	VQWKVDNALQSGNSQESVTEQDSK	Q2(Deamidated);Q10(Deamidated);N13(Deamidated)	2732.000	3174.4	2	1588.21	2679.21	0.00881507	2.77693	0.0010528	71	0.1535	0.004562	494.1748	HexNAc(1)Neu5Ac(1)	P01834_VQWKVDNALQSGNSQESVTEQDSK_HexNAc(1)Neu5Ac(1)	File25311 Spectrum7271 scans: 12097
P07357	PAAVTCQLSNWSEWTDCFPCQDKK	C6(Carbamidomethyl);C17(Carbamidomethyl);C20(Carbamidomethyl)	4609.000	3334.46	3	1112.5	2927.27	0.0357179	10.7117	0.00012513	70	0.1473	0.004562	406.1587	HexNAc(2)	P07357_PAAVTCQLSNWSEWTDCFPCQDKK_HexNAc(2)	File25311 Spectrum17760 scans: 23111
P02671	PGGNEITRGGSTSYGTGSETESPRNPSSAGSWNSGSSGPGSTGNR	N33(Deamidated);N4(Deamidated);N25(Deamidated)	3195.000	4750	4	1188.51	4343.87	-0.0233206	-4.90959	0.001444	69	0.05284	0.00182	406.1587	HexNAc(2)	P02671_PGGNEITRGGSTSYGTGSETESPRNPSSAGSWNSGSSGPGSTGNR_HexNAc(2)	File25311 Spectrum9962 scans: 14923
P01024	GKDYAGVFSDAGLTFTSSSGQQTAQR		5398.000	3538.62	3	1180.55	2678.26	0.0565647	15.9849	0.006175	67	0.1669	0.004562	859.3070	Hex(1)HexNAc(2)Neu5Ac(1)	P01024_GKDYAGVFSDAGLTFTSSSGQQTAQR_Hex(1)HexNAc(2)Neu5Ac(1)	File25311 Spectrum22209 scans: 28042
P01834	AKVQWKVDNALQSGNSQESVTEQDSK	Q4(Deamidated);N15(Deamidated)	2798.000	3736.68	5	748.343	2877.36	0.00829309	2.21937	0.0043666	66	0.2264	0.007539	859.3070	Hex(1)HexNAc(2)Neu5Ac(1)	P01834_AKVQWKVDNALQSGNSQESVTEQDSK_Hex(1)HexNAc(2)Neu5Ac(1)	File25311 Spectrum7663 scans: 12508
P27918	PVPQHGGPFCAGDATR	C10(Carbamidomethyl)	2537.000	2177.95	4	545.494	1665.77	-0.0150476	-6.90909	0.0029839	64	0.1021	0.00182	511.1901	Fuc(1)Hex(1)HexNAc(1)	P27918_PVPQHGGPFCAGDATR_Fuc(1)Hex(1)HexNAc(1)	File25311 Spectrum6155 scans: 10913
Q14520	KHPYTGPSCSQVVPVCRPNPCQNGATCSR	C9(Carbamidomethyl);C16(Carbamidomethyl);C21(Carbamidomethyl);N23(Deamidated);C27(Carbamidomethyl)	3098.000	3721.64	4	931.417	3314.48	-0.00442779	-1.18974	0.056174	62	0.1164	0.003423	406.1587	HexNAc(2)	Q14520_KHPYTGPSCSQVVPVCRPNPCQNGATCSR_HexNAc(2)	File25311 Spectrum9420 scans: 14354
P01834	VDNALQSGNSQESVTEQDSK	Q11(Deamidated)	2761.000	2792.12	2	1397.07	2135.95	-0.0538177	-19.2748	0.0021056	61	0.2109	0.004562	656.2276	Hex(1)HexNAc(1)Neu5Ac(1)	P01834_VDNALQSGNSQESVTEQDSK_Hex(1)HexNAc(1)Neu5Ac(1)	File25311 Spectrum7445 scans: 12279
Q9BS26	EFHHGPDPTDTAPGEQAQDVASSPPESSFQK	Q16(Deamidated);Q18(Deamidated)	3159.000	3701.63	4	926.415	3294.42	0.0488011	13.1837	0.019665	60	0.2072	0.004562	406.1587	HexNAc(2)	Q9BS26_EFHHGPDPTDTAPGEQAQDVASSPPESSFQK_HexNAc(2)	File25311 Spectrum9763 scans: 14714
P01834	QWKVDNALQSGNSQESVTEQDSK	N6(Deamidated)	2960.000	2781.23	2	1391.62	2578.18	-0.0252712	-9.08632	0.0011636	58	0.09648	0.00182	203.0794	HexNAc(1)	P01834_QWKVDNALQSGNSQESVTEQDSK_HexNAc(1)	File25311 Spectrum8629 scans: 13523
P02768	EKPLLEKSHCIAEVENDEMPADLPSLAADFVESK	C10(Carbamidomethyl);N16(Deamidated);M19(Oxidation)	4531.000	4776.07	5	956.222	3827.81	-0.0658888	-13.7956	0.011295	54	0.2176	0.004562	947.3230	Hex(1)HexNAc(1)Neu5Ac(2)	P02768_EKPLLEKSHCIAEVENDEMPADLPSLAADFVESK_Hex(1)HexNAc(1)Neu5Ac(2)	File25311 Spectrum17329 scans: 22658
P54098	FLDTMSMHMAISGLSSFQR	M5(Oxidation);M7(Oxidation);M9(Oxidation)	1570.000	2409.09	4	603.281	2205.99	0.0281987	11.7051	0.40501	50	0.2044	0.004562	203.0794	HexNAc(1)	P54098_FLDTMSMHMAISGLSSFQR_HexNAc(1)	File25311 Spectrum570 scans: 5049
P05155	ASSNPNATSSSSQDPESLQDRGEGK	N4(Deamidated);N6(Deamidated)	2309.000	2957.21	3	986.743	2550.1	-0.0509745	-17.2374	0.0010456	50	0.1434	0.004562	406.1587	HexNAc(2)	P05155_ASSNPNATSSSSQDPESLQDRGEGK_HexNAc(2)	File25311 Spectrum4837 scans: 9529
P02790	CWSLAIATPLPPTSAHGNVAEGETKPDPDVTER	C1(Carbamidomethyl);N18(Deamidated)	2686.000	4375.92	3	1459.65	3516.68	-0.0739423	-16.8976	0.13954	47	0.145	0.004562	859.3070	Hex(1)HexNAc(2)Neu5Ac(1)	P02790_CWSLAIATPLPPTSAHGNVAEGETKPDPDVTER_Hex(1)HexNAc(2)Neu5Ac(1)	File25311 Spectrum6998 scans: 11810

## Sheet: Table S2B
Table S2B. Intact glycopeptides identified from 1.0 μL human serum by using Ti-IMAC(IV) method.
Proteins	Sequence	Modifications	RT [sec]	Precursor Mass	Precursor Charge	Precursor m/z	Peptide Mass	Mass Error [Da]	Mass Error [ppm]	PSM e-value	Rank Score	percolator:PEP	percolator:Q value	Delta Mass	Glycan compositions	Intact glycopeptides	MS Title
Q14624	IEETTMTTQTPAPIQAPSAILPLPGQSVER	M6(Oxidation)	4889.000	4138.98	3	1380.67	3191.64	0.0234761	5.67194	1.7903e-20	234	4.176e-05	0.002709	947.3230	Hex(1)HexNAc(1)Neu5Ac(2)	Q14624_IEETTMTTQTPAPIQAPSAILPLPGQSVER_Hex(1)HexNAc(1)Neu5Ac(2)	File25315 Spectrum21165 scans: 26729
P00747	IPSCDSSPVSTEQLAPTAPPELTPVVQDCYHGDGQSYR	C4(Carbamidomethyl);C29(Carbamidomethyl)	4503.000	4815.15	3	1606.06	4157.89	0.0258633	5.37122	2.3602e-22	221	7.088e-05	0.002709	656.2276	Hex(1)HexNAc(1)Neu5Ac(1)	P00747_IPSCDSSPVSTEQLAPTAPPELTPVVQDCYHGDGQSYR_Hex(1)HexNAc(1)Neu5Ac(1)	File25315 Spectrum18905 scans: 24348
P02790	TPLPPTSAHGNVAEGETKPDPDVTER		3105.000	3661.65	3	1221.56	2714.31	0.00841846	2.29909	4.9571e-17	216	0.0001843	0.002709	947.3230	Hex(1)HexNAc(1)Neu5Ac(2)	P02790_TPLPPTSAHGNVAEGETKPDPDVTER_Hex(1)HexNAc(1)Neu5Ac(2)	File25315 Spectrum10451 scans: 15454
P02765	TVVQPSVGAAAGPVVPPCPGR	C18(Carbamidomethyl)	4065.000	2671.3	2	1336.66	2015.06	0.00781716	2.92635	5.5992e-16	210	3.253e-06	0.002709	656.2276	Hex(1)HexNAc(1)Neu5Ac(1)	P02765_TVVQPSVGAAAGPVVPPCPGR_Hex(1)HexNAc(1)Neu5Ac(1)	File25315 Spectrum16360 scans: 21676
Q14624	IEETTMTTQTPAPIQAPSAILPLPGQSVER	M6(Oxidation)	4819.000	3847.89	3	1283.64	3191.64	0.0282761	7.34846	4.4147e-20	210	0.0002202	0.002709	656.2276	Hex(1)HexNAc(1)Neu5Ac(1)	Q14624_IEETTMTTQTPAPIQAPSAILPLPGQSVER_Hex(1)HexNAc(1)Neu5Ac(1)	File25315 Spectrum20752 scans: 26292
P00747	IPSCDSSPVSTEQLAPTAPPELTPVVQDCYHGDGQSYR	C4(Carbamidomethyl);C29(Carbamidomethyl)	4549.000	4523.03	3	1508.69	4157.89	0.0075319	1.66523	1.4736e-22	209	1.18699e-08	0.00270924	365.1322	Hex(1)HexNAc(1)	P00747_IPSCDSSPVSTEQLAPTAPPELTPVVQDCYHGDGQSYR_Hex(1)HexNAc(1)	File25315 Spectrum19166 scans: 24622
Q9NZP8	VQNHCQEPYYQAAAAGALTCATPGTWK	C5(Carbamidomethyl);C20(Carbamidomethyl)	4387.000	3939.68	3	1314.23	2992.36	-0.00574002	-1.45698	1.347e-14	208	0.0009918	0.002709	947.3230	Hex(1)HexNAc(1)Neu5Ac(2)	Q9NZP8_VQNHCQEPYYQAAAAGALTCATPGTWK_Hex(1)HexNAc(1)Neu5Ac(2)	File25315 Spectrum18262 scans: 23673
Q14520	WEYCDVSACSAQDVAYPEESPTEPSTKLPGFDSCGK	C34(Carbamidomethyl);C4(Carbamidomethyl);C9(Carbamidomethyl)	4585.000	4722.97	3	1575.33	4066.72	0.0192568	4.07726	6.7226e-22	208	1.519e-05	0.002709	656.2276	Hex(1)HexNAc(1)Neu5Ac(1)	Q14520_WEYCDVSACSAQDVAYPEESPTEPSTKLPGFDSCGK_Hex(1)HexNAc(1)Neu5Ac(1)	File25315 Spectrum19359 scans: 24825
P02790	TPLPPTSAHGNVAEGETKPDPDVTER		2745.000	3080.45	2	1541.23	2714.31	0.00062629	0.203311	1.651e-19	204	6.023e-08	0.002709	365.1322	Hex(1)HexNAc(1)	P02790_TPLPPTSAHGNVAEGETKPDPDVTER_Hex(1)HexNAc(1)	File25315 Spectrum8071 scans: 12935
Q16610	NVALVSGDTENAKGQGEQGSTGGTNISSTSEPKEE	Q15(Deamidated)	3275.000	4426.94	3	1476.65	3478.58	0.0302638	6.83628	1.8889e-18	201	0.0006845	0.002709	947.3230	Hex(1)HexNAc(1)Neu5Ac(2)	Q16610_NVALVSGDTENAKGQGEQGSTGGTNISSTSEPKEE_Hex(1)HexNAc(1)Neu5Ac(2)	File25315 Spectrum11568 scans: 16644
P02790	TPLPPTSAHGNVAEGETKPDPDVTER		2925.000	3370.54	2	1686.28	2714.31	-0.00070507	-0.209186	8.3715e-19	200	0.0002553	0.002709	656.2276	Hex(1)HexNAc(1)Neu5Ac(1)	P02790_TPLPPTSAHGNVAEGETKPDPDVTER_Hex(1)HexNAc(1)Neu5Ac(1)	File25315 Spectrum9256 scans: 14191
Q9NZP8	VQNHCQEPYYQAAAAGALTCATPGTWK	C5(Carbamidomethyl);C20(Carbamidomethyl)	4341.000	3648.6	3	1217.21	2992.36	0.01016	2.78463	1.5846e-14	194	2.635e-05	0.002709	656.2276	Hex(1)HexNAc(1)Neu5Ac(1)	Q9NZP8_VQNHCQEPYYQAAAAGALTCATPGTWK_Hex(1)HexNAc(1)Neu5Ac(1)	File25315 Spectrum18002 scans: 23400
Q16610	GQGEQGSTGGTNISSTSEPKEE		2461.000	3126.27	3	1043.1	2178.95	-0.0021078	-0.67422	5.3091e-14	193	0.00128	0.002709	947.3230	Hex(1)HexNAc(1)Neu5Ac(2)	Q16610_GQGEQGSTGGTNISSTSEPKEE_Hex(1)HexNAc(1)Neu5Ac(2)	File25315 Spectrum6207 scans: 10953
P01871	ISESHPNATFSAVGEASICEDDWNSGER	N7(Deamidated);C19(Carbamidomethyl)	4102.000	3576.51	3	1193.18	3065.29	0.0239835	6.70585	4.0268e-16	190	0.000268	0.002709	511.1901	Fuc(1)Hex(1)HexNAc(1)	P01871_ISESHPNATFSAVGEASICEDDWNSGER_Fuc(1)Hex(1)HexNAc(1)	File25315 Spectrum16579 scans: 21906
P04004	DELCSYYQSCCTDYTAECKPQVTR	C4(Carbamidomethyl);C10(Carbamidomethyl);C11(Carbamidomethyl);C18(Carbamidomethyl)	4047.000	3527.35	3	1176.79	3033.22	-0.051522	-14.6064	3.1673e-18	188	0.0003461	0.002709	494.1748	HexNAc(1)Neu5Ac(1)	P04004_DELCSYYQSCCTDYTAECKPQVTR_HexNAc(1)Neu5Ac(1)	File25315 Spectrum16252 scans: 21562
P05155	SNPNATSSSSQDPESLQDRGEGK	N4(Deamidated)	2407.000	3250.35	3	1084.46	2391.04	0.00325191	1.00048	2.6951e-14	188	1.697e-05	0.002709	859.3070	Hex(1)HexNAc(2)Neu5Ac(1)	P05155_SNPNATSSSSQDPESLQDRGEGK_Hex(1)HexNAc(2)Neu5Ac(1)	File25315 Spectrum5849 scans: 10578
Q96PD5	DGSPDVTTADIGANTPDATK		3395.000	2893.22	2	1447.62	1944.89	0.00653415	2.25843	9.0272e-15	185	1.564e-05	0.002709	947.3230	Hex(1)HexNAc(1)Neu5Ac(2)	Q96PD5_DGSPDVTTADIGANTPDATK_Hex(1)HexNAc(1)Neu5Ac(2)	File25315 Spectrum12373 scans: 17489
P04004	SYYQSCCTDYTAECKPQVTR	Q4(Deamidated);C6(Carbamidomethyl);C7(Carbamidomethyl);C14(Carbamidomethyl)	4154.000	3464.32	3	1155.78	2517.02	-0.0309892	-8.94526	2.4958e-14	184	0.0008271	0.002709	947.3230	Hex(1)HexNAc(1)Neu5Ac(2)	P04004_SYYQSCCTDYTAECKPQVTR_Hex(1)HexNAc(1)Neu5Ac(2)	File25315 Spectrum16909 scans: 22252
P02748	AQYTTSYDPELTESSGSASHIDCR	C23(Carbamidomethyl)	4074.000	3534.41	3	1179.14	2674.15	-0.0456016	-12.9022	1.8283e-14	184	0.0005495	0.002709	859.3070	Hex(1)HexNAc(2)Neu5Ac(1)	P02748_AQYTTSYDPELTESSGSASHIDCR_Hex(1)HexNAc(2)Neu5Ac(1)	File25315 Spectrum16417 scans: 21736
Q14624	TMTTQTPAPIQAPSAILPLPGQSVER	M2(Oxidation)	4682.000	4544.15	3	1515.73	2719.42	0.0850362	18.7133	2.524e-16	182	0.0008746	0.002709	1823.6453	Fuc(1)Hex(3)HexNAc(3)Neu5Ac(2)	Q14624_TMTTQTPAPIQAPSAILPLPGQSVER_Fuc(1)Hex(3)HexNAc(3)Neu5Ac(2)	File25315 Spectrum19941 scans: 25436
P02671	TSYGTGSETESPRNPSSAGSWNSGSSGPGSTGNR	N22(Deamidated)	2862.000	3519.5	3	1174.17	3316.41	0.00950838	2.70163	3.5637e-19	181	3.518e-05	0.002709	203.0794	HexNAc(1)	P02671_TSYGTGSETESPRNPSSAGSWNSGSSGPGSTGNR_HexNAc(1)	File25315 Spectrum8826 scans: 13740
P02765	TVVQPSVGAAAGPVVPPCPGR	C18(Carbamidomethyl)	4255.000	2962.4	3	988.473	2015.06	0.0116407	3.92949	3.2938e-12	180	0.005332	0.002709	947.3230	Hex(1)HexNAc(1)Neu5Ac(2)	P02765_TVVQPSVGAAAGPVVPPCPGR_Hex(1)HexNAc(1)Neu5Ac(2)	File25315 Spectrum17516 scans: 22890
P02748	QYTTSYDPELTESSGSASHIDCR	Q1(Deamidated);C22(Carbamidomethyl)	4079.000	3552.44	3	1185.15	2604.09	0.0244966	6.8957	1.1512e-12	179	0.002641	0.002709	947.3230	Hex(1)HexNAc(1)Neu5Ac(2)	P02748_QYTTSYDPELTESSGSASHIDCR_Hex(1)HexNAc(1)Neu5Ac(2)	File25315 Spectrum16444 scans: 21764
P19827	TFVLSALQPSPTHSSSNTQR	N17(Deamidated)	4438.000	2814.3	3	939.109	2158.07	0.01091	3.87661	9.1895e-13	179	0.001873	0.002709	656.2276	Hex(1)HexNAc(1)Neu5Ac(1)	P19827_TFVLSALQPSPTHSSSNTQR_Hex(1)HexNAc(1)Neu5Ac(1)	File25315 Spectrum18542 scans: 23967
P05155	NPNATSSSSQDPESLQDRGEGK	N3(Deamidated)	2229.000	2669.15	2	1335.58	2304.01	0.0052568	1.96947	2.1567e-13	179	0.001072	0.002709	365.1322	Hex(1)HexNAc(1)	P05155_NPNATSSSSQDPESLQDRGEGK_Hex(1)HexNAc(1)	File25315 Spectrum4689 scans: 9360
Q14624	RVMNMKIEETTMTTQTPAPIQAPSAILPLPGQSVER	N4(Deamidated);Q15(Deamidated)	4972.000	4797.23	3	1600.08	3937	-0.0843938	-17.5922	4.5997e-15	178	0.0003765	0.002709	859.3070	Hex(1)HexNAc(2)Neu5Ac(1)	Q14624_RVMNMKIEETTMTTQTPAPIQAPSAILPLPGQSVER_Hex(1)HexNAc(2)Neu5Ac(1)	File25315 Spectrum21625 scans: 27217
Q9UGM5	FVSVTCDFFESQAPATGSENSAVNQKPTNLPK	C6(Carbamidomethyl)	4617.000	4125.88	4	1032.48	3469.65	0.011295	2.7376	4.9096e-20	177	0.0002707	0.002709	656.2276	Hex(1)HexNAc(1)Neu5Ac(1)	Q9UGM5_FVSVTCDFFESQAPATGSENSAVNQKPTNLPK_Hex(1)HexNAc(1)Neu5Ac(1)	File25315 Spectrum19539 scans: 25014
P04217	NQNGWSGDSAPVELILSDETLPAPEFSPEPESGR	N1(Deamidated);Q2(Deamidated)	4891.000	3992.85	3	1331.96	3626.65	0.0613554	15.3663	8.5906e-13	177	0.002108	0.002709	365.1322	Hex(1)HexNAc(1)	P04217_NQNGWSGDSAPVELILSDETLPAPEFSPEPESGR_Hex(1)HexNAc(1)	File25315 Spectrum21173 scans: 26738
P02790	LPPTSAHGNVAEGETKPDPDVTER		2808.000	3172.44	2	1587.23	2516.21	0.00113728	0.358487	1.2888e-13	177	0.001357	0.002709	656.2276	Hex(1)HexNAc(1)Neu5Ac(1)	P02790_LPPTSAHGNVAEGETKPDPDVTER_Hex(1)HexNAc(1)Neu5Ac(1)	File25315 Spectrum8464 scans: 13359
P02671	TGSETESPRNPSSAGSWNSGSSGPGSTGNR		2835.000	3402.47	3	1135.16	2907.26	0.0261545	7.68694	3.1476e-18	177	1.794e-07	0.002709	494.1748	HexNAc(1)Neu5Ac(1)	P02671_TGSETESPRNPSSAGSWNSGSSGPGSTGNR_HexNAc(1)Neu5Ac(1)	File25315 Spectrum8644 scans: 13548
P02765	TVVQPSVGAAAGPVVPPCPGR	C18(Carbamidomethyl)	3880.000	2380.2	3	794.406	2015.06	0.0029407	1.23548	5.2563e-16	176	6.007e-06	0.002709	365.1322	Hex(1)HexNAc(1)	P02765_TVVQPSVGAAAGPVVPPCPGR_Hex(1)HexNAc(1)	File25315 Spectrum15305 scans: 20568
P02649	VQAAVGTSAAPVPSDNH		3098.000	2276.03	2	1139.02	1619.79	0.00829871	3.64614	5.8208e-13	175	0.001473	0.002709	656.2276	Hex(1)HexNAc(1)Neu5Ac(1)	P02649_VQAAVGTSAAPVPSDNH_Hex(1)HexNAc(1)Neu5Ac(1)	File25315 Spectrum10412 scans: 15407
P02671	SETESPRNPSSAGSWNSGSSGPGSTGNR	N16(Deamidated)	2567.000	3406.46	3	1136.49	2750.18	0.0531498	15.6027	8.3767e-17	173	0.001075	0.002709	656.2276	Hex(1)HexNAc(1)Neu5Ac(1)	P02671_SETESPRNPSSAGSWNSGSSGPGSTGNR_Hex(1)HexNAc(1)Neu5Ac(1)	File25315 Spectrum6902 scans: 11694
P04004	DDGEEKNNATVHEQVGGPSLTSDLQAQSK		4571.000	4877	3	1626.68	3053.42	-0.0592088	-12.1404	9.6585e-16	171	3.795e-06	0.002709	1823.6453	Fuc(1)Hex(3)HexNAc(3)Neu5Ac(2)	P04004_DDGEEKNNATVHEQVGGPSLTSDLQAQSK_Fuc(1)Hex(3)HexNAc(3)Neu5Ac(2)	File25315 Spectrum19282 scans: 24744
P12259	FTVNNLAEPQKAPSHQQATTAGSPLR		3561.000	3418.65	3	1140.56	2762.41	0.0124807	3.65077	3.0396e-13	170	0.003794	0.002709	656.2276	Hex(1)HexNAc(1)Neu5Ac(1)	P12259_FTVNNLAEPQKAPSHQQATTAGSPLR_Hex(1)HexNAc(1)Neu5Ac(1)	File25315 Spectrum13410 scans: 18578
P19827	TFVLSALQPSPTHSSSNTQR		4036.000	2522.22	3	841.747	2157.08	0.00612554	2.42863	3.1848e-11	170	0.004135	0.002709	365.1322	Hex(1)HexNAc(1)	P19827_TFVLSALQPSPTHSSSNTQR_Hex(1)HexNAc(1)	File25315 Spectrum16185 scans: 21492
Q96PD5	DGSPDVTTADIGANTPDATKGCPDVQASLPDAK	N14(Deamidated);C22(Carbamidomethyl)	4097.000	4232.86	3	1411.96	3284.5	0.0320418	7.56979	2.3188e-13	170	7.193e-05	0.002709	947.3230	Hex(1)HexNAc(1)Neu5Ac(2)	Q96PD5_DGSPDVTTADIGANTPDATKGCPDVQASLPDAK_Hex(1)HexNAc(1)Neu5Ac(2)	File25315 Spectrum16552 scans: 21877
Q04756	AVPSSSSPQAQALTEDGRPC	C20(Carbamidomethyl)	3408.000	2713.18	3	905.399	2056.95	-0.000811391	-0.299056	1.3601e-13	169	4.183e-05	0.002709	656.2276	Hex(1)HexNAc(1)Neu5Ac(1)	Q04756_AVPSSSSPQAQALTEDGRPC_Hex(1)HexNAc(1)Neu5Ac(1)	File25315 Spectrum12450 scans: 17570
Q14624	VSRVMNMKIEETTMTTQTPAPIQAPSAILPLPGQSVER	M5(Oxidation);N6(Deamidated);Q17(Deamidated)	4821.000	4504.15	4	1127.05	4139.1	-0.0745586	-16.5533	4.0705e-15	169	0.001426	0.002709	365.1322	Hex(1)HexNAc(1)	Q14624_VSRVMNMKIEETTMTTQTPAPIQAPSAILPLPGQSVER_Hex(1)HexNAc(1)	File25315 Spectrum20767 scans: 26308
Q14624	MNMKIEETTMTTQTPAPIQAPSAILPLPGQSVER	Q13(Deamidated)	4906.000	4541.15	4	1136.3	3680.85	-0.00252972	-0.557065	1.5926e-16	168	0.0006411	0.002709	859.3070	Hex(1)HexNAc(2)Neu5Ac(1)	Q14624_MNMKIEETTMTTQTPAPIQAPSAILPLPGQSVER_Hex(1)HexNAc(2)Neu5Ac(1)	File25315 Spectrum21260 scans: 26829
P0C0L5	APADLRGVAHNNLMAMAQETGDNLYWGSVTGSQSNAVSPTPAPR	N11(Deamidated);N12(Deamidated);M16(Oxidation)	4316.000	4934.2	4	1234.56	4569.13	-0.0561951	-11.3889	3.4194e-19	168	0.0002845	0.002709	365.1322	Hex(1)HexNAc(1)	P0C0L5_APADLRGVAHNNLMAMAQETGDNLYWGSVTGSQSNAVSPTPAPR_Hex(1)HexNAc(1)	File25315 Spectrum17862 scans: 23253
P02760	GPVPTPPDNIQVQENFNISR	N17(Deamidated)	5159.000	2879.34	3	960.787	2222.1	0.0116412	4.04301	1.216e-12	168	5.317e-05	0.002709	656.2276	Hex(1)HexNAc(1)Neu5Ac(1)	P02760_GPVPTPPDNIQVQENFNISR_Hex(1)HexNAc(1)Neu5Ac(1)	File25315 Spectrum22650 scans: 28324
P00747	SCDSSPVSTEQLAPTAPPELTPVVQDCYHGDGQSYR	C2(Carbamidomethyl);Q11(Deamidated);C27(Carbamidomethyl)	4602.000	4606.01	3	1536.35	3948.74	0.0417755	9.06978	1.4852e-15	168	0.0006866	0.002709	656.2276	Hex(1)HexNAc(1)Neu5Ac(1)	P00747_SCDSSPVSTEQLAPTAPPELTPVVQDCYHGDGQSYR_Hex(1)HexNAc(1)Neu5Ac(1)	File25315 Spectrum19454 scans: 24924
P01871	ESHPNATFSAVGEASICEDDWNSGER	C17(Carbamidomethyl)	4886.000	3520.47	3	1174.5	2864.19	0.0480916	13.6605	6.7336e-13	167	2.42e-05	0.002709	656.2276	Hex(1)HexNAc(1)Neu5Ac(1)	P01871_ESHPNATFSAVGEASICEDDWNSGER_Hex(1)HexNAc(1)Neu5Ac(1)	File25315 Spectrum21147 scans: 26710
P02671	GSETESPRNPSSAGSWNSGSSGPGSTGNR		2580.000	3463.51	3	1155.51	2806.21	0.065633	18.9499	3.8452e-16	164	0.0009742	0.002709	656.2276	Hex(1)HexNAc(1)Neu5Ac(1)	P02671_GSETESPRNPSSAGSWNSGSSGPGSTGNR_Hex(1)HexNAc(1)Neu5Ac(1)	File25315 Spectrum6984 scans: 11780
P04003	VDKDQYVEPENVTIQCDSGYGVVGPQSITCSGNR	N11(Deamidated);C16(Carbamidomethyl);C30(Carbamidomethyl)	4532.000	3974.82	3	1325.95	3771.7	0.0369373	9.29283	9.7434e-18	164	6.396e-05	0.002709	203.0794	HexNAc(1)	P04003_VDKDQYVEPENVTIQCDSGYGVVGPQSITCSGNR_HexNAc(1)	File25315 Spectrum19070 scans: 24521
P0C0L4::P0C0L5	WGSVTGSQSNAVSPTPAPR		3468.000	2845.25	3	949.425	1897.93	0.00163175	0.5735	6.3641e-12	163	0.0017	0.002709	947.3230	Hex(1)HexNAc(1)Neu5Ac(2)	P0C0L4::P0C0L5_WGSVTGSQSNAVSPTPAPR_Hex(1)HexNAc(1)Neu5Ac(2)	File25315 Spectrum12859 scans: 18000
P05155	NPNATSSSSQDPESLQDRGEGK	N3(Deamidated)	2597.000	3251.34	3	1084.79	2304.01	0.00718033	2.20842	7.6663e-12	163	0.004526	0.002709	947.3230	Hex(1)HexNAc(1)Neu5Ac(2)	P05155_NPNATSSSSQDPESLQDRGEGK_Hex(1)HexNAc(1)Neu5Ac(2)	File25315 Spectrum7087 scans: 11888
P12259	APSHQQATTAGSPLR		2363.000	2177	2	1089.51	1520.77	0.00149375	0.686153	3.7081e-11	160	0.004551	0.002709	656.2276	Hex(1)HexNAc(1)Neu5Ac(1)	P12259_APSHQQATTAGSPLR_Hex(1)HexNAc(1)Neu5Ac(1)	File25315 Spectrum5557 scans: 10271
P04004	FEDGVLDPDYPRNISDGFDGIPDNVDAALALPAHSY	N13(Deamidated)	4937.000	4824.01	3	1609.01	3875.78	-0.0928421	-19.2458	7.9726e-14	159	2.978e-05	0.002709	947.3230	Hex(1)HexNAc(1)Neu5Ac(2)	P04004_FEDGVLDPDYPRNISDGFDGIPDNVDAALALPAHSY_Hex(1)HexNAc(1)Neu5Ac(2)	File25315 Spectrum21431 scans: 27010
P02671	GGSTSYGTGSETESPRNPSSAGSWNSGSSGPGSTGNR	N25(Deamidated)	2966.000	4174.73	3	1392.58	3517.49	0.0128839	3.08615	1.4286e-14	159	0.00044	0.002709	656.2276	Hex(1)HexNAc(1)Neu5Ac(1)	P02671_GGSTSYGTGSETESPRNPSSAGSWNSGSSGPGSTGNR_Hex(1)HexNAc(1)Neu5Ac(1)	File25315 Spectrum9519 scans: 14469
P01834	QSGNSQESVTEQDSKDSTYSLSSTLTLSK		4273.000	3618.7	3	1207.24	3106.44	0.0677109	18.7114	6.954e-17	159	5.771e-07	0.002709	511.1901	Fuc(1)Hex(1)HexNAc(1)	P01834_QSGNSQESVTEQDSKDSTYSLSSTLTLSK_Fuc(1)Hex(1)HexNAc(1)	File25315 Spectrum17625 scans: 23004
P00747	AGHLAGGTDSCQGDSGGPLVCFEKDK	C11(Carbamidomethyl);C21(Carbamidomethyl)	4548.000	3522.54	3	1175.19	2662.18	0.0562381	15.9652	5.075e-14	158	0.002931	0.002709	859.3070	Hex(1)HexNAc(2)Neu5Ac(1)	P00747_AGHLAGGTDSCQGDSGGPLVCFEKDK_Hex(1)HexNAc(2)Neu5Ac(1)	File25315 Spectrum19156 scans: 24612
P0C0L4::P0C0L5	AQETGDNLYWGSVTGSQSNAVSPTPAPR		4579.000	3836.69	3	1279.91	2889.35	0.019042	4.96313	8.1039e-12	155	5.777e-05	0.002709	947.3230	Hex(1)HexNAc(1)Neu5Ac(2)	P0C0L4::P0C0L5_AQETGDNLYWGSVTGSQSNAVSPTPAPR_Hex(1)HexNAc(1)Neu5Ac(2)	File25315 Spectrum19328 scans: 24792
P00734	RQECSIPVCGQDQVTVAMTPR	C4(Carbamidomethyl);C9(Carbamidomethyl)	3790.000	3087.37	3	1030.13	2431.14	0.00653758	2.11752	1.9841e-12	154	0.01083	0.002709	656.2276	Hex(1)HexNAc(1)Neu5Ac(1)	P00734_RQECSIPVCGQDQVTVAMTPR_Hex(1)HexNAc(1)Neu5Ac(1)	File25315 Spectrum14743 scans: 19978
P05155	NPNATSSSSQDPESLQDRGEGK		2250.000	2959.26	3	987.427	2303.03	0.00509593	1.72203	2.7511e-10	154	0.008972	0.002709	656.2276	Hex(1)HexNAc(1)Neu5Ac(1)	P05155_NPNATSSSSQDPESLQDRGEGK_Hex(1)HexNAc(1)Neu5Ac(1)	File25315 Spectrum4822 scans: 9499
P03952	LCNTGDNSVCTTK	C2(Carbamidomethyl);C10(Carbamidomethyl)	2163.000	2124.86	2	1063.44	1468.63	0.00201937	0.950356	4.1563e-10	154	0.01353	0.002709	656.2276	Hex(1)HexNAc(1)Neu5Ac(1)	P03952_LCNTGDNSVCTTK_Hex(1)HexNAc(1)Neu5Ac(1)	File25315 Spectrum4262 scans: 8911
P13671	MSPEEDCSHHSEDLCVFDTDSNDYFTSPACK	M1(Oxidation);C7(Carbamidomethyl);C15(Carbamidomethyl);N22(Deamidated);C30(Carbamidomethyl)	4426.000	4644.75	4	1162.19	3696.39	0.0329175	7.08703	1.4913e-10	153	0.002481	0.002709	947.3230	Hex(1)HexNAc(1)Neu5Ac(2)	P13671_MSPEEDCSHHSEDLCVFDTDSNDYFTSPACK_Hex(1)HexNAc(1)Neu5Ac(2)	File25315 Spectrum18475 scans: 23896
P05155	NATSSSSQDPESLQDRGEGK	N1(Deamidated)	2415.000	2749.15	3	917.389	2092.91	0.00307166	1.11731	2.7054e-09	152	0.01103	0.002709	656.2276	Hex(1)HexNAc(1)Neu5Ac(1)	P05155_NATSSSSQDPESLQDRGEGK_Hex(1)HexNAc(1)Neu5Ac(1)	File25315 Spectrum5911 scans: 10643
P19827	VLSALQPSPTHSSSNTQR		3206.000	2856.29	3	953.103	1908.97	-0.00208204	-0.728934	7.8535e-11	152	0.0002089	0.002709	947.3230	Hex(1)HexNAc(1)Neu5Ac(2)	P19827_VLSALQPSPTHSSSNTQR_Hex(1)HexNAc(1)Neu5Ac(2)	File25315 Spectrum11116 scans: 16159
P02649	AATVGSLAGQPLQER		3959.000	2444.12	2	1223.06	1496.79	-0.00245836	-1.00583	1.4255e-08	152	0.003669	0.002709	947.3230	Hex(1)HexNAc(1)Neu5Ac(2)	P02649_AATVGSLAGQPLQER_Hex(1)HexNAc(1)Neu5Ac(2)	File25315 Spectrum15753 scans: 21038
P02671	GSESGIFTNTKESSSHHPGIAEFPSR		3427.000	3414.52	4	854.637	2758.29	-0.00339126	-0.993187	6.7091e-12	151	0.001847	0.002709	656.2276	Hex(1)HexNAc(1)Neu5Ac(1)	P02671_GSESGIFTNTKESSSHHPGIAEFPSR_Hex(1)HexNAc(1)Neu5Ac(1)	File25315 Spectrum12587 scans: 17714
P19827	TFVLSALQPSPTHSSSNTQR		4612.000	3104.41	3	1035.81	2157.08	0.00402554	1.29672	9.2703e-10	151	0.01865	0.002709	947.3230	Hex(1)HexNAc(1)Neu5Ac(2)	P19827_TFVLSALQPSPTHSSSNTQR_Hex(1)HexNAc(1)Neu5Ac(2)	File25315 Spectrum19513 scans: 24986
P02671	HRHPDEAAFFDTASTGK		3273.000	2833.19	3	945.405	1885.87	-0.000553361	-0.195313	9.495e-13	150	0.001708	0.002709	947.3230	Hex(1)HexNAc(1)Neu5Ac(2)	P02671_HRHPDEAAFFDTASTGK_Hex(1)HexNAc(1)Neu5Ac(2)	File25315 Spectrum11551 scans: 16626
P19827	VLSALQPSPTHSSSNTQR		2932.000	2565.19	3	856.07	1908.97	-0.00508204	-1.98116	1.1643e-11	150	0.001406	0.002709	656.2276	Hex(1)HexNAc(1)Neu5Ac(1)	P19827_VLSALQPSPTHSSSNTQR_Hex(1)HexNAc(1)Neu5Ac(1)	File25315 Spectrum9304 scans: 14242
P05154	KRVEDLHVGATVAPSSR		2553.000	2477.21	4	620.311	1820.99	0.00040001	0.161476	1.2512e-10	148	0.004428	0.002709	656.2276	Hex(1)HexNAc(1)Neu5Ac(1)	P05154_KRVEDLHVGATVAPSSR_Hex(1)HexNAc(1)Neu5Ac(1)	File25315 Spectrum6799 scans: 11586
P0C0L4::P0C0L5	AQETGDNLYWGSVTGSQSNAVSPTPAPR		4408.000	3545.59	3	1182.87	2889.35	0.010942	3.08609	1.799e-10	148	0.0002074	0.002709	656.2276	Hex(1)HexNAc(1)Neu5Ac(1)	P0C0L4::P0C0L5_AQETGDNLYWGSVTGSQSNAVSPTPAPR_Hex(1)HexNAc(1)Neu5Ac(1)	File25315 Spectrum18380 scans: 23797
P01601	LGLLLLCFPGARCDIQMTQSPSSLSASVGDR	C7(Carbamidomethyl);C13(Carbamidomethyl)	3924.000	3755.77	3	1252.93	3348.66	-0.0568499	-15.1367	1.3032e-10	147	0.0001358	0.002709	406.1587	HexNAc(2)	P01601_LGLLLLCFPGARCDIQMTQSPSSLSASVGDR_HexNAc(2)	File25315 Spectrum15562 scans: 20838
P02751	QDSETGTFYQIGDSWEK		4819.000	2849.13	2	1425.57	1989.86	-0.0359688	-12.6245	2.4933e-11	146	0.0001252	0.002709	859.3070	Hex(1)HexNAc(2)Neu5Ac(1)	P02751_QDSETGTFYQIGDSWEK_Hex(1)HexNAc(2)Neu5Ac(1)	File25315 Spectrum20755 scans: 26295
P05155	NPNATSSSSQDPESLQDR	N3(Deamidated)	2410.000	2297.97	2	1149.99	1932.83	0.00694041	3.02024	7.1303e-11	146	0.003652	0.002709	365.1322	Hex(1)HexNAc(1)	P05155_NPNATSSSSQDPESLQDR_Hex(1)HexNAc(1)	File25315 Spectrum5876 scans: 10606
P0C0L4	LGVAHNNLMAMAQETGDNLYWGSVTGSQSNAVSPTPAPR	N6(Deamidated)	3645.000	4989.21	5	998.85	4041.89	-0.00329577	-0.660578	3.2063e-14	146	0.0008846	0.002709	947.3230	Hex(1)HexNAc(1)Neu5Ac(2)	P0C0L4_LGVAHNNLMAMAQETGDNLYWGSVTGSQSNAVSPTPAPR_Hex(1)HexNAc(1)Neu5Ac(2)	File25315 Spectrum13873 scans: 19064
P02671	GGSTSYGTGSETESPR		2224.000	2227.9	2	1114.96	1571.67	0.00308858	1.38632	2.3619e-11	145	0.0003181	0.002709	656.2276	Hex(1)HexNAc(1)Neu5Ac(1)	P02671_GGSTSYGTGSETESPR_Hex(1)HexNAc(1)Neu5Ac(1)	File25315 Spectrum4653 scans: 9322
P19827	VLSALQPSPTHSSSNTQR		2626.000	2274.1	3	759.04	1908.97	0.000917957	0.403658	1.8256e-10	144	0.007528	0.002709	365.1322	Hex(1)HexNAc(1)	P19827_VLSALQPSPTHSSSNTQR_Hex(1)HexNAc(1)	File25315 Spectrum7278 scans: 12089
P02655	TQQPQQDEMPSPTFLTQVK		4711.000	2858.3	3	953.775	2202.06	0.0128871	4.50867	2.673e-10	144	0.007291	0.002709	656.2276	Hex(1)HexNAc(1)Neu5Ac(1)	P02655_TQQPQQDEMPSPTFLTQVK_Hex(1)HexNAc(1)Neu5Ac(1)	File25315 Spectrum20122 scans: 25626
P07358	CVNRRLLCNGDNDCGDQSDEANCR	C1(Carbamidomethyl);N3(Deamidated);C8(Carbamidomethyl);N9(Deamidated);C14(Carbamidomethyl);C23(Carbamidomethyl)	2622.000	3847.41	3	1283.48	2899.13	-0.0534842	-13.9014	1.2881e-10	143	0.01268	0.002709	947.3230	Hex(1)HexNAc(1)Neu5Ac(2)	P07358_CVNRRLLCNGDNDCGDQSDEANCR_Hex(1)HexNAc(1)Neu5Ac(2)	File25315 Spectrum7249 scans: 12058
P02647	LAEYHAKATEHLSTLSEK		2839.000	2974.36	3	992.459	2027.03	-0.000198984	-0.0668998	1.2441e-10	142	0.01164	0.002709	947.3230	Hex(1)HexNAc(1)Neu5Ac(2)	P02647_LAEYHAKATEHLSTLSEK_Hex(1)HexNAc(1)Neu5Ac(2)	File25315 Spectrum8678 scans: 13584
P01876	HYTNPSQDVTVPCPVPSTPPTPSPSTPPTPSPSCCHPR	C34(Carbamidomethyl);C35(Carbamidomethyl);N4(Deamidated);Q7(Deamidated);C13(Carbamidomethyl)	3743.000	4341.98	4	1086.5	4137.85	0.0519601	11.9669	1.3414e-11	141	5.001e-05	0.002709	203.0794	HexNAc(1)	P01876_HYTNPSQDVTVPCPVPSTPPTPSPSTPPTPSPSCCHPR_HexNAc(1)	File25315 Spectrum14446 scans: 19666
P00747	SCDSSPVSTEQLAPTAPPELTPVVQDCYHGDGQSYR	C2(Carbamidomethyl);Q11(Deamidated);C27(Carbamidomethyl)	4571.000	4896.08	3	1633.04	3948.74	0.0183442	3.7467	2.0022e-14	141	4.368e-06	0.002709	947.3230	Hex(1)HexNAc(1)Neu5Ac(2)	P00747_SCDSSPVSTEQLAPTAPPELTPVVQDCYHGDGQSYR_Hex(1)HexNAc(1)Neu5Ac(2)	File25315 Spectrum19283 scans: 24745
P02768	ENDEMPADLPSLAADFVESK		4849.000	3036.24	2	1519.13	2176.98	-0.0513831	-16.9233	4.6045e-12	140	0.003916	0.002709	859.3070	Hex(1)HexNAc(2)Neu5Ac(1)	P02768_ENDEMPADLPSLAADFVESK_Hex(1)HexNAc(2)Neu5Ac(1)	File25315 Spectrum20934 scans: 26483
P01876	HYTNPSQDVTVPCPVPSTPPTPSPSTPPTPSPSCCHPR	C34(Carbamidomethyl);C35(Carbamidomethyl);N4(Deamidated);Q7(Deamidated);C13(Carbamidomethyl)	3761.000	4504.03	4	1127.01	4137.85	0.0439601	9.76017	1.9889e-13	139	0.0004515	0.002709	365.1322	Hex(1)HexNAc(1)	P01876_HYTNPSQDVTVPCPVPSTPPTPSPSTPPTPSPSCCHPR_Hex(1)HexNAc(1)	File25315 Spectrum14565 scans: 19791
P02768	CCEKPLLEKSHCIAEVENDEMPADLPSLAADFVESK	C1(Carbamidomethyl);C2(Carbamidomethyl);C12(Carbamidomethyl);N18(Deamidated)	4849.000	4539.08	4	1135.78	4131.88	0.0384058	8.46116	6.3444e-12	139	1.364e-05	0.002709	406.1587	HexNAc(2)	P02768_CCEKPLLEKSHCIAEVENDEMPADLPSLAADFVESK_HexNAc(2)	File25315 Spectrum20931 scans: 26480
P00747	KCSGTEASVVAPPPVVLLPDVETPSEEDCMFGNGK	N33(Deamidated);C2(Carbamidomethyl);C29(Carbamidomethyl)	5158.000	4227.85	4	1057.97	3716.73	-0.0691712	-16.3609	8.1635e-09	139	0.001812	0.002709	511.1901	Fuc(1)Hex(1)HexNAc(1)	P00747_KCSGTEASVVAPPPVVLLPDVETPSEEDCMFGNGK_Fuc(1)Hex(1)HexNAc(1)	File25315 Spectrum22647 scans: 28321
P02748	TTSYDPELTESSGSASHIDCR	C20(Carbamidomethyl)	3947.000	3259.34	3	1087.45	2311.99	0.0296869	9.10826	8.3785e-09	139	0.0069	0.002709	947.3230	Hex(1)HexNAc(1)Neu5Ac(2)	P02748_TTSYDPELTESSGSASHIDCR_Hex(1)HexNAc(1)Neu5Ac(2)	File25315 Spectrum15692 scans: 20974
P00747	YCKIPSCDSSPVSTEQLAPTAPPELTPVVQDCYHGDGQSYR	C2(Carbamidomethyl);C7(Carbamidomethyl);Q16(Deamidated);C32(Carbamidomethyl)	4503.000	4813.14	4	1204.29	4610.07	-0.00529997	-1.10115	6.3903e-09	139	0.0002133	0.002709	203.0794	HexNAc(1)	P00747_YCKIPSCDSSPVSTEQLAPTAPPELTPVVQDCYHGDGQSYR_HexNAc(1)	File25315 Spectrum18904 scans: 24347
P02656	DKFSEFWDLDPEVRPTSAVAA		4808.000	3035.37	3	1012.8	2379.14	0.00867934	2.8594	1.3779e-07	139	0.06335	0.002709	656.2276	Hex(1)HexNAc(1)Neu5Ac(1)	P02656_DKFSEFWDLDPEVRPTSAVAA_Hex(1)HexNAc(1)Neu5Ac(1)	File25315 Spectrum20685 scans: 26222
P01009	GDAAQKTDTSHHDQDHPTFNK		2195.000	2860.24	2	1431.13	2349.04	0.012733	4.45171	4.8093e-11	138	0.0001804	0.002709	511.1901	Fuc(1)Hex(1)HexNAc(1)	P01009_GDAAQKTDTSHHDQDHPTFNK_Fuc(1)Hex(1)HexNAc(1)	File25315 Spectrum4467 scans: 9126
P01834	QWKVDNALQSGNSQESVTEQDSK		5144.000	4401.91	3	1468.31	2577.19	0.0635993	14.4481	1.9016e-08	138	0.01789	0.002709	1823.6453	Fuc(1)Hex(3)HexNAc(3)Neu5Ac(2)	P01834_QWKVDNALQSGNSQESVTEQDSK_Fuc(1)Hex(3)HexNAc(3)Neu5Ac(2)	File25315 Spectrum22569 scans: 28239
P01042	DIPTNSPELEETLTHTITK		4639.000	2794.31	3	932.443	2138.07	0.00407658	1.45889	4.0487e-14	138	0.0005718	0.002709	656.2276	Hex(1)HexNAc(1)Neu5Ac(1)	P01042_DIPTNSPELEETLTHTITK_Hex(1)HexNAc(1)Neu5Ac(1)	File25315 Spectrum19659 scans: 25140
P02671	TSYGTGSETESPRNPSSAGSWNSGSSGPGSTGNR	N22(Deamidated)	2964.000	4175.74	3	1392.92	3316.41	0.0274084	6.56371	2.1801e-10	138	0.0002531	0.002709	859.3070	Hex(1)HexNAc(2)Neu5Ac(1)	P02671_TSYGTGSETESPRNPSSAGSWNSGSSGPGSTGNR_Hex(1)HexNAc(2)Neu5Ac(1)	File25315 Spectrum9508 scans: 14457
P02656	DKFSEFWDLDPEVRPTSAVAA		4894.000	3327.48	3	1110.17	2379.14	0.0180107	5.41271	3.4026e-09	138	0.02169	0.002709	947.3230	Hex(1)HexNAc(1)Neu5Ac(2)	P02656_DKFSEFWDLDPEVRPTSAVAA_Hex(1)HexNAc(1)Neu5Ac(2)	File25315 Spectrum21193 scans: 26759
P02649	AATVGSLAGQPLQER		3696.000	2153.03	2	1077.52	1496.79	0.00714164	3.31702	1.7192e-09	137	0.01265	0.002709	656.2276	Hex(1)HexNAc(1)Neu5Ac(1)	P02649_AATVGSLAGQPLQER_Hex(1)HexNAc(1)Neu5Ac(1)	File25315 Spectrum14160 scans: 19366
P09486	ENNTPMCVCQDPTSCPAPIGEFEK	M6(Oxidation);C7(Carbamidomethyl);C9(Carbamidomethyl);C15(Carbamidomethyl)	3990.000	3453.43	3	1152.15	2796.15	0.0501652	14.5262	4.7395e-12	137	5.452e-05	0.002709	656.2276	Hex(1)HexNAc(1)Neu5Ac(1)	P09486_ENNTPMCVCQDPTSCPAPIGEFEK_Hex(1)HexNAc(1)Neu5Ac(1)	File25315 Spectrum15926 scans: 21220
P01602	LPGAKCDIQMTQSPSTLSASVGDR	C6(Carbamidomethyl)	3965.000	4342.85	3	1448.62	2518.22	-0.0135702	-3.12471	3.9414e-09	137	0.007286	0.002709	1823.6453	Fuc(1)Hex(3)HexNAc(3)Neu5Ac(2)	P01602_LPGAKCDIQMTQSPSTLSASVGDR_Fuc(1)Hex(3)HexNAc(3)Neu5Ac(2)	File25315 Spectrum15789 scans: 21076
P01857::P01861	YPSDIAVEWESNGQPENNYK		4698.000	2543.13	2	1272.57	2339.03	0.0151583	5.96048	5.5618e-11	137	0.001973	0.002709	203.0794	HexNAc(1)	P01857::P01861_YPSDIAVEWESNGQPENNYK_HexNAc(1)	File25315 Spectrum20043 scans: 25543
P19827	SALQPSPTHSSSNTQR		1957.000	2353.04	2	1177.53	1696.81	0.00137234	0.583218	3.0367e-10	136	0.003169	0.002709	656.2276	Hex(1)HexNAc(1)Neu5Ac(1)	P19827_SALQPSPTHSSSNTQR_Hex(1)HexNAc(1)Neu5Ac(1)	File25315 Spectrum2997 scans: 7582
P01042	SQNCDIYPGKDFVQPPTKICVGCPR	C4(Carbamidomethyl);C20(Carbamidomethyl);C23(Carbamidomethyl)	4202.000	3592.61	3	1198.54	2935.38	0.00239875	0.667689	8.2663e-13	136	0.001138	0.002709	656.2276	Hex(1)HexNAc(1)Neu5Ac(1)	P01042_SQNCDIYPGKDFVQPPTKICVGCPR_Hex(1)HexNAc(1)Neu5Ac(1)	File25315 Spectrum17208 scans: 22566
P00734	PHKPEINSTTHPGADLQENFCR	N7(Deamidated);C21(Carbamidomethyl)	3057.000	2954.38	3	985.802	2548.18	0.0489861	16.5808	6.6566e-13	135	0.0007994	0.002709	406.1587	HexNAc(2)	P00734_PHKPEINSTTHPGADLQENFCR_HexNAc(2)	File25315 Spectrum10126 scans: 15106
P01876	HYTNPSQDVTVPCPVPSTPPTPSPSTPPTPSPSCCHPR	C34(Carbamidomethyl);C35(Carbamidomethyl);N4(Deamidated);Q7(Deamidated);C13(Carbamidomethyl)	3862.000	4795.13	5	960.033	4137.85	0.0449836	9.38112	5.4334e-12	135	0.003643	0.002709	656.2276	Hex(1)HexNAc(1)Neu5Ac(1)	P01876_HYTNPSQDVTVPCPVPSTPPTPSPSTPPTPSPSCCHPR_Hex(1)HexNAc(1)Neu5Ac(1)	File25315 Spectrum15192 scans: 20449
P07996	PDQADTDNNGEGDACAADIDGDGILNER	C15(Carbamidomethyl)	3733.000	3282.35	3	1095.12	2917.19	0.0251547	7.66362	2.0943e-13	135	9.17e-06	0.002709	365.1322	Hex(1)HexNAc(1)	P07996_PDQADTDNNGEGDACAADIDGDGILNER_Hex(1)HexNAc(1)	File25315 Spectrum14382 scans: 19599
Q14624	SRVMNMKIEETTMTTQTPAPIQAPSAILPLPGQSVER	M4(Oxidation);M6(Oxidation);Q22(Deamidated)	4891.000	4549.14	4	1138.29	4055.04	-0.0764437	-16.804	6.9667e-09	135	0.0003192	0.002709	494.1748	HexNAc(1)Neu5Ac(1)	Q14624_SRVMNMKIEETTMTTQTPAPIQAPSAILPLPGQSVER_HexNAc(1)Neu5Ac(1)	File25315 Spectrum21174 scans: 26739
P02656	DKFSEFWDLDPEVRPTSAVAA		4815.000	2745.29	3	916.104	2379.14	0.0177107	6.4513	4.9528e-08	135	0.009156	0.002709	365.1322	Hex(1)HexNAc(1)	P02656_DKFSEFWDLDPEVRPTSAVAA_Hex(1)HexNAc(1)	File25315 Spectrum20729 scans: 26268
Q13790	DANISQPETTKEGLR		2894.000	2605.15	2	1303.58	1657.83	0.00371926	1.42765	8.2898e-09	135	0.003414	0.002709	947.3230	Hex(1)HexNAc(1)Neu5Ac(2)	Q13790_DANISQPETTKEGLR_Hex(1)HexNAc(1)Neu5Ac(2)	File25315 Spectrum9046 scans: 13971
P01042	IASFSQNCDIYPGKDFVQPPTK	C8(Carbamidomethyl)	4391.000	3167.45	3	1056.82	2511.21	0.00706025	2.229	2.3621e-12	135	0.004485	0.002709	656.2276	Hex(1)HexNAc(1)Neu5Ac(1)	P01042_IASFSQNCDIYPGKDFVQPPTK_Hex(1)HexNAc(1)Neu5Ac(1)	File25315 Spectrum18283 scans: 23695
P02679	KFEGNCAEQDGSGWWMNK	C6(Carbamidomethyl)	4379.000	3091.23	2	1546.62	2142.89	0.0140198	4.53535	3.0222e-09	134	0.008478	0.002709	947.3230	Hex(1)HexNAc(1)Neu5Ac(2)	P02679_KFEGNCAEQDGSGWWMNK_Hex(1)HexNAc(1)Neu5Ac(2)	File25315 Spectrum18213 scans: 23621
P05155	PNATSSSSQDPESLQDRGEGK	N2(Deamidated)	2426.000	2846.2	3	949.741	2189.97	0.0054078	1.90001	2.6201e-08	134	0.01045	0.002709	656.2276	Hex(1)HexNAc(1)Neu5Ac(1)	P05155_PNATSSSSQDPESLQDRGEGK_Hex(1)HexNAc(1)Neu5Ac(1)	File25315 Spectrum5980 scans: 10715
P02790	PLPPTSAHGNVAEGETKPDPDVTER		3159.000	3124.47	3	1042.5	2613.27	0.010797	3.45561	2.1086e-11	134	0.002343	0.002709	511.1901	Fuc(1)Hex(1)HexNAc(1)	P02790_PLPPTSAHGNVAEGETKPDPDVTER_Fuc(1)Hex(1)HexNAc(1)	File25315 Spectrum10800 scans: 15827
P00738	LWGQLFAVDSGNDVTDIADDGCPKPPEIAHGYVEHSVR	C22(Carbamidomethyl)	3330.000	4658.15	3	1553.72	4163.96	0.00676304	1.45187	9.2936e-10	133	0.004909	0.002709	494.1748	HexNAc(1)Neu5Ac(1)	P00738_LWGQLFAVDSGNDVTDIADDGCPKPPEIAHGYVEHSVR_HexNAc(1)Neu5Ac(1)	File25315 Spectrum11934 scans: 17028
P06681	GMWDGETAVCDNGAGHCPNPGISLGAVR	C10(Carbamidomethyl);N12(Deamidated);C17(Carbamidomethyl)	4307.000	3554.5	4	889.631	2898.25	0.0209485	5.89352	1.8491e-10	133	6.881e-05	0.002709	656.2276	Hex(1)HexNAc(1)Neu5Ac(1)	P06681_GMWDGETAVCDNGAGHCPNPGISLGAVR_Hex(1)HexNAc(1)Neu5Ac(1)	File25315 Spectrum17817 scans: 23206
P02671	HRHPDEAAFFDTASTGK		3020.000	2542.1	2	1272.06	1885.87	0.00332311	1.30723	2.4266e-10	133	0.001084	0.002709	656.2276	Hex(1)HexNAc(1)Neu5Ac(1)	P02671_HRHPDEAAFFDTASTGK_Hex(1)HexNAc(1)Neu5Ac(1)	File25315 Spectrum9877 scans: 14845
P01031	LDQLVGGVPVTLNAQTIDVNQETSDLDPSK		4873.000	3368.68	2	1685.35	3165.6	0.000129559	0.0384597	3.3418e-12	133	0.001734	0.002709	203.0794	HexNAc(1)	P01031_LDQLVGGVPVTLNAQTIDVNQETSDLDPSK_HexNAc(1)	File25315 Spectrum21070 scans: 26626
P00738	DVTDIADDGCPKPPEIAHGYVEHSVR	C10(Carbamidomethyl)	3706.000	3371.51	3	1124.85	2876.34	-0.00441908	-1.31071	8.1039e-12	133	0.001086	0.002709	494.1748	HexNAc(1)Neu5Ac(1)	P00738_DVTDIADDGCPKPPEIAHGYVEHSVR_HexNAc(1)Neu5Ac(1)	File25315 Spectrum14213 scans: 19421
Q92954	KKPTPKPPVVDEAGSGLDNGDFK	N19(Deamidated)	3142.000	3053.47	4	764.374	2396.22	0.0132702	4.34596	2.4962e-08	133	0.003825	0.002709	656.2276	Hex(1)HexNAc(1)Neu5Ac(1)	Q92954_KKPTPKPPVVDEAGSGLDNGDFK_Hex(1)HexNAc(1)Neu5Ac(1)	File25315 Spectrum10689 scans: 15710
P05154	VEDLHVGATVAPSSR		3120.000	2193.02	3	732.014	1536.79	0.00265054	1.20862	1.5188e-09	132	0.002492	0.002709	656.2276	Hex(1)HexNAc(1)Neu5Ac(1)	P05154_VEDLHVGATVAPSSR_Hex(1)HexNAc(1)Neu5Ac(1)	File25315 Spectrum10546 scans: 15557
P01857::P01861	SLTCLVKGFYPSDIAVEWESNGQPENNYK	C4(Carbamidomethyl)	4705.000	4203.81	3	1402.28	3344.57	-0.0640873	-15.245	9.229e-09	132	0.001128	0.002709	859.3070	Hex(1)HexNAc(2)Neu5Ac(1)	P01857::P01861_SLTCLVKGFYPSDIAVEWESNGQPENNYK_Hex(1)HexNAc(2)Neu5Ac(1)	File25315 Spectrum20083 scans: 25585
P01871	SQVLLPSKDVMQGTDEHVVCK	C20(Carbamidomethyl)	3900.000	2775.36	3	926.127	2369.17	0.0294542	10.6128	2.3572e-11	132	0.0001296	0.002709	406.1587	HexNAc(2)	P01871_SQVLLPSKDVMQGTDEHVVCK_HexNAc(2)	File25315 Spectrum15424 scans: 20693
P0C0L4::P0C0L5	GSVTGSQSNAVSPTPAPR		2628.000	2659.18	2	1330.6	1711.85	0.0101212	3.80613	4.1096e-08	132	0.009247	0.002709	947.3230	Hex(1)HexNAc(1)Neu5Ac(2)	P0C0L4::P0C0L5_GSVTGSQSNAVSPTPAPR_Hex(1)HexNAc(1)Neu5Ac(2)	File25315 Spectrum7292 scans: 12103
P04004	TMPEDEYTVYDDGEEKNNATVHEQVGGPSLTSDLQAQSK		4335.000	4938.06	4	1235.52	4281.91	-0.077891	-15.7736	2.1525e-09	132	0.00024	0.002709	656.2276	Hex(1)HexNAc(1)Neu5Ac(1)	P04004_TMPEDEYTVYDDGEEKNNATVHEQVGGPSLTSDLQAQSK_Hex(1)HexNAc(1)Neu5Ac(1)	File25315 Spectrum17969 scans: 23365
P04004	FTMPEDEYTVYDDGEEKNNATVHEQVGGPSLTSDLQAQSK	N18(Deamidated);N19(Deamidated)	4534.000	4797.08	3	1600.03	4430.95	-0.00902832	-1.88205	3.8645e-14	132	8.41e-06	0.002709	365.1322	Hex(1)HexNAc(1)	P04004_FTMPEDEYTVYDDGEEKNNATVHEQVGGPSLTSDLQAQSK_Hex(1)HexNAc(1)	File25315 Spectrum19085 scans: 24537
P00450	EPEKVDKDNEDFQESNR	Q13(Deamidated)	2593.000	2590.08	3	864.368	2078.9	-0.011701	-4.51762	7.0422e-08	131	0.006136	0.002709	511.1901	Fuc(1)Hex(1)HexNAc(1)	P00450_EPEKVDKDNEDFQESNR_Fuc(1)Hex(1)HexNAc(1)	File25315 Spectrum7062 scans: 11862
P05154	RVEDLHVGATVAPSSR		2874.000	2349.12	3	784.048	1692.89	0.0026395	1.12361	4.88e-09	131	0.01825	0.002709	656.2276	Hex(1)HexNAc(1)Neu5Ac(1)	P05154_RVEDLHVGATVAPSSR_Hex(1)HexNAc(1)Neu5Ac(1)	File25315 Spectrum8907 scans: 13825
Q14624	KIEETTMTTQTPAPIQAPSAILPLPGQSVER	Q10(Deamidated);Q16(Deamidated)	4688.000	4254.04	3	1419.02	3305.71	0.00792787	1.86361	8.9583e-09	131	0.006061	0.002709	947.3230	Hex(1)HexNAc(1)Neu5Ac(2)	Q14624_KIEETTMTTQTPAPIQAPSAILPLPGQSVER_Hex(1)HexNAc(1)Neu5Ac(2)	File25315 Spectrum19974 scans: 25470
P01834	VQWKVDNALQSGNSQESVTEQDSK		2822.000	3535.62	3	1179.55	2676.26	0.051854	14.6662	3.1898e-11	130	0.0003894	0.002709	859.3070	Hex(1)HexNAc(2)Neu5Ac(1)	P01834_VQWKVDNALQSGNSQESVTEQDSK_Hex(1)HexNAc(2)Neu5Ac(1)	File25315 Spectrum8562 scans: 13462
P02790	ATPLPPTSAHGNVAEGETKPDPDVTER	N12(Deamidated)	2601.000	3734.7	4	934.682	2786.34	0.036344	9.73143	1.0839e-08	130	0.03037	0.002709	947.3230	Hex(1)HexNAc(1)Neu5Ac(2)	P02790_ATPLPPTSAHGNVAEGETKPDPDVTER_Hex(1)HexNAc(1)Neu5Ac(2)	File25315 Spectrum7114 scans: 11917
Q13790	DANISQPETTKEGLR	N3(Deamidated)	2712.000	2315.04	3	772.688	1658.81	0.0025272	1.09164	4.0505e-08	130	0.01005	0.002709	656.2276	Hex(1)HexNAc(1)Neu5Ac(1)	Q13790_DANISQPETTKEGLR_Hex(1)HexNAc(1)Neu5Ac(1)	File25315 Spectrum7837 scans: 12688
P13671	CICMSPEEDCSHHSEDLCVFDTDSNDYFTSPACK	C1(Carbamidomethyl);C33(Carbamidomethyl);C3(Carbamidomethyl);M4(Oxidation);C10(Carbamidomethyl);C18(Carbamidomethyl)	4369.000	4640.76	4	1161.2	4128.55	0.0148726	3.20478	9.8685e-09	130	0.009529	0.002709	511.1901	Fuc(1)Hex(1)HexNAc(1)	P13671_CICMSPEEDCSHHSEDLCVFDTDSNDYFTSPACK_Fuc(1)Hex(1)HexNAc(1)	File25315 Spectrum18157 scans: 23563
P02768	KPLLEKSHCIAEVENDEMPADLPSLAADFVESK	C9(Carbamidomethyl);N15(Deamidated)	4828.000	4631.06	4	1158.77	3682.77	-0.0416046	-8.98381	1.604e-09	129	0.009834	0.002709	947.3230	Hex(1)HexNAc(1)Neu5Ac(2)	P02768_KPLLEKSHCIAEVENDEMPADLPSLAADFVESK_Hex(1)HexNAc(1)Neu5Ac(2)	File25315 Spectrum20805 scans: 26348
P02656	FSEFWDLDPEVRPTSAVA		4989.000	3012.31	3	1005.11	2064.98	0.0112992	3.75101	1.917e-07	129	0.05871	0.002709	947.3230	Hex(1)HexNAc(1)Neu5Ac(2)	P02656_FSEFWDLDPEVRPTSAVA_Hex(1)HexNAc(1)Neu5Ac(2)	File25315 Spectrum21720 scans: 27319
P02656	FSEFWDLDPEVRPTSAVAA		4985.000	3083.35	3	1028.79	2136.02	0.00788542	2.55742	1.4074e-06	128	0.02359	0.002709	947.3230	Hex(1)HexNAc(1)Neu5Ac(2)	P02656_FSEFWDLDPEVRPTSAVAA_Hex(1)HexNAc(1)Neu5Ac(2)	File25315 Spectrum21695 scans: 27293
P02679	TSHNGMQFSTWDNDNDKFEGNCAEQDGSGWWMNK	C22(Carbamidomethyl)	4134.000	4487.83	4	1122.97	3992.58	0.0710769	15.8377	6.6069e-10	128	0.008162	0.002709	494.1748	HexNAc(1)Neu5Ac(1)	P02679_TSHNGMQFSTWDNDNDKFEGNCAEQDGSGWWMNK_HexNAc(1)Neu5Ac(1)	File25315 Spectrum16787 scans: 22124
P02671	GNEITRGGSTSYGTGSETESPRNPSSAGSWNSGSSGPGSTGNR	N2(Deamidated);N23(Deamidated)	2509.000	4554.95	5	911.998	4188.81	0.0076775	1.68553	6.4802e-11	127	0.001384	0.002709	365.1322	Hex(1)HexNAc(1)	P02671_GNEITRGGSTSYGTGSETESPRNPSSAGSWNSGSSGPGSTGNR_Hex(1)HexNAc(1)	File25315 Spectrum6519 scans: 11286
P00747	KIPSCDSSPVSTEQLAPTAPPELTPVVQDCYHGDGQSYR	C5(Carbamidomethyl);C30(Carbamidomethyl)	4448.000	4942.23	4	1236.57	4285.99	0.0136924	2.77049	7.1806e-10	127	0.0001221	0.002709	656.2276	Hex(1)HexNAc(1)Neu5Ac(1)	P00747_KIPSCDSSPVSTEQLAPTAPPELTPVVQDCYHGDGQSYR_Hex(1)HexNAc(1)Neu5Ac(1)	File25315 Spectrum18600 scans: 24028
P01024	GKDYAGVFSDAGLTFTSSSGQQTAQR		5483.000	3538.6	3	1180.54	2678.26	0.0343647	9.71138	3.8237e-07	126	0.01002	0.002709	859.3070	Hex(1)HexNAc(2)Neu5Ac(1)	P01024_GKDYAGVFSDAGLTFTSSSGQQTAQR_Hex(1)HexNAc(2)Neu5Ac(1)	File25315 Spectrum24341 scans: 30268
P01024	VFSDAGLTFTSSSGQQTAQR		4724.000	2493.14	2	1247.58	2086.99	-0.0118143	-4.73872	6.0786e-08	126	0.009416	0.002709	406.1587	HexNAc(2)	P01024_VFSDAGLTFTSSSGQQTAQR_HexNAc(2)	File25315 Spectrum20211 scans: 25719
P02751	HTSVQTTSSGSGPFTDVR		3165.000	2519.11	2	1260.56	1862.88	0.00797813	3.16704	1.2506e-09	126	0.001339	0.002709	656.2276	Hex(1)HexNAc(1)Neu5Ac(1)	P02751_HTSVQTTSSGSGPFTDVR_Hex(1)HexNAc(1)Neu5Ac(1)	File25315 Spectrum10836 scans: 15865
P06681	NGMWDGETAVCDNGAGHCPNPGISLGAVR	M3(Oxidation);C11(Carbamidomethyl);C18(Carbamidomethyl)	4510.000	3538.52	3	1180.51	3027.3	0.0287985	8.13856	8.5886e-09	126	0.01323	0.002709	511.1901	Fuc(1)Hex(1)HexNAc(1)	P06681_NGMWDGETAVCDNGAGHCPNPGISLGAVR_Fuc(1)Hex(1)HexNAc(1)	File25315 Spectrum18944 scans: 24389
P19827	TFVLSALQPSPTHSSSNTQR		2616.000	2564.22	3	855.747	2157.08	-0.0241431	-9.41538	6.8524e-10	125	0.007074	0.002709	406.1587	HexNAc(2)	P19827_TFVLSALQPSPTHSSSNTQR_HexNAc(2)	File25315 Spectrum7203 scans: 12010
P01859	SSVVTVPSSNFGTQTYTCNVDHKPSNTKVDK	C18(Carbamidomethyl)	3877.000	3599.74	3	1200.92	3396.63	0.0319726	8.88192	1.4219e-13	125	1.452e-05	0.002709	203.0794	HexNAc(1)	P01859_SSVVTVPSSNFGTQTYTCNVDHKPSNTKVDK_HexNAc(1)	File25315 Spectrum15281 scans: 20543
P02768	EVENDEMPADLPSLAADFVESK	N4(Deamidated);M7(Oxidation)	4944.000	3079.26	3	1027.43	2422.07	-0.0470654	-15.2847	1.2927e-09	124	0.0006953	0.002709	656.2276	Hex(1)HexNAc(1)Neu5Ac(1)	P02768_EVENDEMPADLPSLAADFVESK_Hex(1)HexNAc(1)Neu5Ac(1)	File25315 Spectrum21473 scans: 27054
P02790	ATPLPPTSAHGNVAEGETKPDPDVTER		2958.000	3644.59	4	912.155	2785.35	-0.0695718	-19.0891	3.6493e-08	124	0.0006911	0.002709	859.3070	Hex(1)HexNAc(2)Neu5Ac(1)	P02790_ATPLPPTSAHGNVAEGETKPDPDVTER_Hex(1)HexNAc(2)Neu5Ac(1)	File25315 Spectrum9470 scans: 14417
P02671	GGSTSYGTGSETESPRN		2150.000	2341.94	3	781.655	1685.71	0.00268465	1.14634	1.166e-07	123	0.04442	0.002709	656.2276	Hex(1)HexNAc(1)Neu5Ac(1)	P02671_GGSTSYGTGSETESPRN_Hex(1)HexNAc(1)Neu5Ac(1)	File25315 Spectrum4183 scans: 8828
P01023	ASDCHGEDSQAFCEK	C4(Carbamidomethyl);C13(Carbamidomethyl)	2419.000	2104.78	2	1053.39	1739.65	-0.00830096	-3.94387	5.0647e-09	123	0.00663	0.002709	365.1322	Hex(1)HexNAc(1)	P01023_ASDCHGEDSQAFCEK_Hex(1)HexNAc(1)	File25315 Spectrum5930 scans: 10663
P02656	DKFSEFWDLDPEVRPTSAVA		4901.000	3255.43	4	814.864	2308.1	0.00351667	1.08025	1.2348e-06	123	0.01132	0.002709	947.3230	Hex(1)HexNAc(1)Neu5Ac(2)	P02656_DKFSEFWDLDPEVRPTSAVA_Hex(1)HexNAc(1)Neu5Ac(2)	File25315 Spectrum21234 scans: 26802
P02671	HRHPDEAAFFDTASTGK		3016.000	2252	3	751.673	1885.87	-0.008022	-3.56217	6.1738e-11	122	0.01407	0.002709	365.1322	Hex(1)HexNAc(1)	P02671_HRHPDEAAFFDTASTGK_Hex(1)HexNAc(1)	File25315 Spectrum9853 scans: 14819
P01591	PTEVELDNQIVTATQSNICDEDSATETCYTYDR	C19(Carbamidomethyl);C28(Carbamidomethyl)	5122.000	4243.79	3	1415.6	3837.65	-0.0145524	-3.42911	3.7657e-08	122	0.009018	0.002709	406.1587	HexNAc(2)	P01591_PTEVELDNQIVTATQSNICDEDSATETCYTYDR_HexNAc(2)	File25315 Spectrum22448 scans: 28109
P00450	EHEGAIYPDNTTDFQR	N10(Deamidated)	3439.000	2549.05	3	850.691	1892.82	0.00648523	2.54417	3.1441e-07	122	0.01862	0.002709	656.2276	Hex(1)HexNAc(1)Neu5Ac(1)	P00450_EHEGAIYPDNTTDFQR_Hex(1)HexNAc(1)Neu5Ac(1)	File25315 Spectrum12666 scans: 17797
Q92954	SPDESTPELSAEPTPK		3280.000	2340.02	2	1171.02	1683.78	0.00552145	2.35958	2.2021e-06	122	0.02523	0.002709	656.2276	Hex(1)HexNAc(1)Neu5Ac(1)	Q92954_SPDESTPELSAEPTPK_Hex(1)HexNAc(1)Neu5Ac(1)	File25315 Spectrum11600 scans: 16678
P02790	MPCPGRGHGHRNGTGHGNSTHHGPEYMR	M1(Oxidation);C3(Carbamidomethyl);N12(Deamidated);N18(Deamidated)	1865.000	4059.56	3	1354.19	3111.31	-0.0773182	-19.046	3.7416e-10	121	0.0009273	0.002709	947.3230	Hex(1)HexNAc(1)Neu5Ac(2)	P02790_MPCPGRGHGHRNGTGHGNSTHHGPEYMR_Hex(1)HexNAc(1)Neu5Ac(2)	File25315 Spectrum2411 scans: 6955
P04004	FTMPEDEYTVYDDGEEKNNATVHEQVGGPSLTSDLQAQSK	M3(Oxidation);N18(Deamidated)	4475.000	4940.12	4	1236.04	4445.96	-0.0188352	-3.8127	2.2913e-08	120	0.01693	0.002709	494.1748	HexNAc(1)Neu5Ac(1)	P04004_FTMPEDEYTVYDDGEEKNNATVHEQVGGPSLTSDLQAQSK_HexNAc(1)Neu5Ac(1)	File25315 Spectrum18745 scans: 24180
P02656	FSEFWDLDPEVRPTSAVAA		4884.000	2792.25	2	1397.13	2136.02	0.00706189	2.5291	0.00012803	120	0.0671	0.002709	656.2276	Hex(1)HexNAc(1)Neu5Ac(1)	P02656_FSEFWDLDPEVRPTSAVAA_Hex(1)HexNAc(1)Neu5Ac(1)	File25315 Spectrum21132 scans: 26695
P01876	HYTNPSQDVTVPCPVPSTPPTPSPSTPPTPSPSCCHPR	C34(Carbamidomethyl);C35(Carbamidomethyl);C13(Carbamidomethyl)	3808.000	4995.2	4	1249.81	4135.88	0.0120599	2.4143	3.1328e-10	120	0.0002054	0.002709	859.3070	Hex(1)HexNAc(2)Neu5Ac(1)	P01876_HYTNPSQDVTVPCPVPSTPPTPSPSTPPTPSPSCCHPR_Hex(1)HexNAc(2)Neu5Ac(1)	File25315 Spectrum14858 scans: 20099
P09871	DSCKGDSGGAFAVQDPNDKTK	C3(Carbamidomethyl)	2439.000	2400.04	2	1201.03	2195.98	-0.0187466	-7.81097	1.1225e-09	120	0.0007261	0.002709	203.0794	HexNAc(1)	P09871_DSCKGDSGGAFAVQDPNDKTK_HexNAc(1)	File25315 Spectrum6066 scans: 10805
P02774	AKLPDATPTELAK		3159.000	2009.98	2	1006	1353.75	0.00386608	1.92344	1.1448e-08	120	0.01853	0.002709	656.2276	Hex(1)HexNAc(1)Neu5Ac(1)	P02774_AKLPDATPTELAK_Hex(1)HexNAc(1)Neu5Ac(1)	File25315 Spectrum10802 scans: 15829
P04004	GDVFTMPEDEYTVYDDGEEKNNATVHEQVGGPSLTSDLQAQSK	M6(Oxidation);N21(Deamidated);N22(Deamidated)	5134.000	4922.07	3	1641.7	4718.06	-0.0783637	-15.9209	6.1423e-10	120	0.005422	0.002709	203.0794	HexNAc(1)	P04004_GDVFTMPEDEYTVYDDGEEKNNATVHEQVGGPSLTSDLQAQSK_HexNAc(1)	File25315 Spectrum22514 scans: 28181
P02679	FFTSHNGMQFSTWDNDNDKFEGNCAEQDGSGWW	C24(Carbamidomethyl)	4632.000	4570.85	3	1524.63	3913.54	0.0808006	17.6773	2.871e-08	119	0.0333	0.002709	656.2276	Hex(1)HexNAc(1)Neu5Ac(1)	P02679_FFTSHNGMQFSTWDNDNDKFEGNCAEQDGSGWW_Hex(1)HexNAc(1)Neu5Ac(1)	File25315 Spectrum19623 scans: 25102
P04004	FNVDKKCQCDELCSYYQSCCTDYTAECKPQVTR	N2(Deamidated);C7(Carbamidomethyl);Q8(Deamidated);C9(Carbamidomethyl);C13(Carbamidomethyl);Q17(Deamidated);C19(Carbamidomethyl);C20(Carbamidomethyl);C27(Carbamidomethyl)	3882.000	4581.8	4	1146.46	4215.69	-0.0320123	-6.98685	8.9711e-09	119	0.004979	0.002709	365.1322	Hex(1)HexNAc(1)	P04004_FNVDKKCQCDELCSYYQSCCTDYTAECKPQVTR_Hex(1)HexNAc(1)	File25315 Spectrum15314 scans: 20577
P02751	NCESKPEAEETCFDKYTGNTYR	C2(Carbamidomethyl);C12(Carbamidomethyl)	3421.000	2902.22	4	726.563	2698.13	0.0130805	4.50706	2.0656e-08	119	0.007407	0.002709	203.0794	HexNAc(1)	P02751_NCESKPEAEETCFDKYTGNTYR_HexNAc(1)	File25315 Spectrum12544 scans: 17669
P02671	GGSTSYGTGSETESPRNPSSAGSW		3473.000	3014.23	3	1005.75	2358	0.000345028	0.114467	6.3404e-09	118	0.02402	0.002709	656.2276	Hex(1)HexNAc(1)Neu5Ac(1)	P02671_GGSTSYGTGSETESPRNPSSAGSW_Hex(1)HexNAc(1)Neu5Ac(1)	File25315 Spectrum12888 scans: 18030
P00748	TPPQSQTPGALPAKR		2600.000	2204.09	3	735.705	1547.84	0.0220806	10.018	1.3868e-08	118	0.02208	0.002709	656.2276	Hex(1)HexNAc(1)Neu5Ac(1)	P00748_TPPQSQTPGALPAKR_Hex(1)HexNAc(1)Neu5Ac(1)	File25315 Spectrum7104 scans: 11906
P04004	TMPEDEYTVYDDGEEKNNATVHEQVGGPSLTSDLQAQSK	M2(Oxidation)	4567.000	4704.1	4	1177.03	4297.91	0.0328943	6.99269	2.2086e-09	118	0.0002359	0.002709	406.1587	HexNAc(2)	P04004_TMPEDEYTVYDDGEEKNNATVHEQVGGPSLTSDLQAQSK_HexNAc(2)	File25315 Spectrum19261 scans: 24722
P00450	PEKVDKDNEDFQESNR		2394.000	2605.09	3	869.37	1948.88	-0.0144923	-5.56307	6.8114e-07	118	0.04268	0.002709	656.2276	Hex(1)HexNAc(1)Neu5Ac(1)	P00450_PEKVDKDNEDFQESNR_Hex(1)HexNAc(1)Neu5Ac(1)	File25315 Spectrum5769 scans: 10494
P19827	RTFVLSALQPSPTHSSSNTQR	N18(Deamidated)	3910.000	2970.42	4	743.612	2314.17	0.0231224	7.78424	3.8255e-09	118	0.01724	0.002709	656.2276	Hex(1)HexNAc(1)Neu5Ac(1)	P19827_RTFVLSALQPSPTHSSSNTQR_Hex(1)HexNAc(1)Neu5Ac(1)	File25315 Spectrum15485 scans: 20757
P36955	AGFEWNEDGAGTTPSPGLQPAHL		4718.000	3007.33	3	1003.45	2351.08	0.0223316	7.42572	1.9877e-09	117	0.001306	0.002709	656.2276	Hex(1)HexNAc(1)Neu5Ac(1)	P36955_AGFEWNEDGAGTTPSPGLQPAHL_Hex(1)HexNAc(1)Neu5Ac(1)	File25315 Spectrum20171 scans: 25677
P19827	SALQPSPTHSSSNTQR		2190.000	2644.14	3	882.388	1696.81	0.00569587	2.15415	2.3193e-06	116	0.03133	0.002709	947.3230	Hex(1)HexNAc(1)Neu5Ac(2)	P19827_SALQPSPTHSSSNTQR_Hex(1)HexNAc(1)Neu5Ac(2)	File25315 Spectrum4432 scans: 9090
P02768	NDEMPADLPSLAADFVESK		4841.000	2995.29	3	999.438	2047.94	0.0298336	9.96016	1.1746e-06	116	0.007371	0.002709	947.3230	Hex(1)HexNAc(1)Neu5Ac(2)	P02768_NDEMPADLPSLAADFVESK_Hex(1)HexNAc(1)Neu5Ac(2)	File25315 Spectrum20885 scans: 26432
O75882	CVNGGRCNPGTGQCVCPAGWVGEQCQHCGGR	C1(Carbamidomethyl);C7(Carbamidomethyl);N8(Deamidated);C14(Carbamidomethyl);C16(Carbamidomethyl);C25(Carbamidomethyl);C28(Carbamidomethyl)	3251.000	4132.64	5	827.535	3475.39	0.0187802	4.54436	2.974e-10	116	0.002503	0.002709	656.2276	Hex(1)HexNAc(1)Neu5Ac(1)	O75882_CVNGGRCNPGTGQCVCPAGWVGEQCQHCGGR_Hex(1)HexNAc(1)Neu5Ac(1)	File25315 Spectrum11407 scans: 16475
P02671	TSEDGSDCPEAMDLGTLSGIGTLDGFR	C8(Carbamidomethyl);M12(Oxidation)	4927.000	3223.38	3	1075.47	2816.21	0.00893335	2.77142	9.8107e-10	116	0.0003932	0.002709	406.1587	HexNAc(2)	P02671_TSEDGSDCPEAMDLGTLSGIGTLDGFR_HexNAc(2)	File25315 Spectrum21380 scans: 26956
P04004	MPEDEYTVYDDGEEKNNATVHEQVGGPSLTSDLQAQSK	N16(Deamidated);N17(Deamidated);Q23(Deamidated)	4292.000	4840.09	4	1211.03	4183.82	0.0445407	9.20245	3.9201e-07	115	0.001639	0.002709	656.2276	Hex(1)HexNAc(1)Neu5Ac(1)	P04004_MPEDEYTVYDDGEEKNNATVHEQVGGPSLTSDLQAQSK_Hex(1)HexNAc(1)Neu5Ac(1)	File25315 Spectrum17731 scans: 23115
P01834	VQWKVDNALQSGNSQESVTEQDSK	Q2(Deamidated);N7(Deamidated);Q10(Deamidated)	2559.000	3627.56	3	1210.19	2679.21	0.0186386	5.13806	3.2361e-07	115	0.02886	0.002709	947.3230	Hex(1)HexNAc(1)Neu5Ac(2)	P01834_VQWKVDNALQSGNSQESVTEQDSK_Hex(1)HexNAc(1)Neu5Ac(2)	File25315 Spectrum6838 scans: 11627
P02675	DMNTENGGWTVIQNR	N3(Deamidated);N6(Deamidated)	4041.000	2230.95	2	1116.48	1735.75	0.0218155	9.77857	6.9973e-07	115	0.004726	0.002709	494.1748	HexNAc(1)Neu5Ac(1)	P02675_DMNTENGGWTVIQNR_HexNAc(1)Neu5Ac(1)	File25315 Spectrum16213 scans: 21521
P36955	PEEGSPDPDSTGALVEEEDPFFKVPVNK		4885.000	3685.66	3	1229.56	3028.42	0.00755948	2.05105	3.87e-07	115	0.005555	0.002709	656.2276	Hex(1)HexNAc(1)Neu5Ac(1)	P36955_PEEGSPDPDSTGALVEEEDPFFKVPVNK_Hex(1)HexNAc(1)Neu5Ac(1)	File25315 Spectrum21140 scans: 26703
P04196	SCSSCQHATFGTNGAQR	C2(Carbamidomethyl);C5(Carbamidomethyl);N13(Deamidated)	2338.000	2524.99	3	842.671	1868.75	0.0102772	4.07019	3.0694e-08	114	0.002504	0.002709	656.2276	Hex(1)HexNAc(1)Neu5Ac(1)	P04196_SCSSCQHATFGTNGAQR_Hex(1)HexNAc(1)Neu5Ac(1)	File25315 Spectrum5400 scans: 10106
P01599	GLLLLWFPGARCDIQMTQSPSSLSASVGDR	C12(Carbamidomethyl);M16(Oxidation)	2994.000	3933.84	3	1312.29	3277.62	-0.0137967	-3.50718	1.1106e-07	114	0.01256	0.002709	656.2276	Hex(1)HexNAc(1)Neu5Ac(1)	P01599_GLLLLWFPGARCDIQMTQSPSSLSASVGDR_Hex(1)HexNAc(1)Neu5Ac(1)	File25315 Spectrum9710 scans: 14669
P05155	NPNATSSSSQDPESLQDR	N3(Deamidated)	2697.000	2590.08	3	864.367	1932.83	0.0189953	7.33387	1.133e-07	114	0.01212	0.002709	656.2276	Hex(1)HexNAc(1)Neu5Ac(1)	P05155_NPNATSSSSQDPESLQDR_Hex(1)HexNAc(1)Neu5Ac(1)	File25315 Spectrum7731 scans: 12577
P02751	QMVQPQSPVAVSQSKPGCYDNGK	Q6(Deamidated);C18(Carbamidomethyl);N21(Deamidated)	3041.000	2872.32	3	958.447	2506.15	0.0357781	12.4562	3.8116e-10	114	0.000255	0.002709	365.1322	Hex(1)HexNAc(1)	P02751_QMVQPQSPVAVSQSKPGCYDNGK_Hex(1)HexNAc(1)	File25315 Spectrum10017 scans: 14992
P49747	QKDSDGDGIGDACDNCPQK	C13(Carbamidomethyl);C16(Carbamidomethyl)	2308.000	2591.06	3	864.693	2078.83	0.0384557	14.8417	2.1451e-08	114	0.02214	0.002709	511.1901	Fuc(1)Hex(1)HexNAc(1)	P49747_QKDSDGDGIGDACDNCPQK_Fuc(1)Hex(1)HexNAc(1)	File25315 Spectrum5207 scans: 9903
P02768	AEVENDEMPADLPSLAADFVESKDVCK	N5(Deamidated);C26(Carbamidomethyl)	4689.000	3491.56	4	873.897	2979.34	0.0309907	8.87589	6.2221e-08	113	0.005383	0.002709	511.1901	Fuc(1)Hex(1)HexNAc(1)	P02768_AEVENDEMPADLPSLAADFVESKDVCK_Fuc(1)Hex(1)HexNAc(1)	File25315 Spectrum19982 scans: 25479
P04217	PSATVTIEELAAPPPPVLMHHGESSQVLHPGNK	M19(Oxidation)	4584.000	4315.12	4	1079.79	3455.75	0.0583552	13.5234	4.1485e-07	113	0.01589	0.002709	859.3070	Hex(1)HexNAc(2)Neu5Ac(1)	P04217_PSATVTIEELAAPPPPVLMHHGESSQVLHPGNK_Hex(1)HexNAc(2)Neu5Ac(1)	File25315 Spectrum19358 scans: 24824
P02768	HCIAEVENDEMPADLPSLAADFVESK	C2(Carbamidomethyl);M11(Oxidation)	4851.000	3413.52	3	1138.85	2902.3	0.0250809	7.34754	1.5375e-06	113	0.02008	0.002709	511.1901	Fuc(1)Hex(1)HexNAc(1)	P02768_HCIAEVENDEMPADLPSLAADFVESK_Fuc(1)Hex(1)HexNAc(1)	File25315 Spectrum20944 scans: 26494
P02768	LEKSHCIAEVENDEMPADLPSLAADFVESK	C6(Carbamidomethyl)	4856.000	3546.61	3	1183.21	3343.56	-0.029153	-8.21997	1.4162e-07	113	0.008523	0.002709	203.0794	HexNAc(1)	P02768_LEKSHCIAEVENDEMPADLPSLAADFVESK_HexNAc(1)	File25315 Spectrum20971 scans: 26522
Q9UGM5	FVSVTCDFFESQAPATGSENSAVNQKPTNLPKVEESQQK	C6(Carbamidomethyl);Q12(Deamidated)	4493.000	4956.28	3	1653.1	4299.03	0.0205406	4.14436	2.5584e-09	113	0.004323	0.002709	656.2276	Hex(1)HexNAc(1)Neu5Ac(1)	Q9UGM5_FVSVTCDFFESQAPATGSENSAVNQKPTNLPKVEESQQK_Hex(1)HexNAc(1)Neu5Ac(1)	File25315 Spectrum18850 scans: 24290
Q14520	EYCDVSACSAQDVAYPEESPTEPSTKLPGFDSCGK	C33(Carbamidomethyl);C3(Carbamidomethyl);C8(Carbamidomethyl)	4585.000	4739.98	4	1186	3880.64	0.0332933	7.02393	2.1526e-06	112	0.03321	0.002709	859.3070	Hex(1)HexNAc(2)Neu5Ac(1)	Q14520_EYCDVSACSAQDVAYPEESPTEPSTKLPGFDSCGK_Hex(1)HexNAc(2)Neu5Ac(1)	File25315 Spectrum19363 scans: 24829
P04196	SSTTKPPFKPHGSR		1835.000	2473.12	5	495.632	1525.8	-7.4783e-06	-0.00302383	2.6314e-07	112	0.02346	0.002709	947.3230	Hex(1)HexNAc(1)Neu5Ac(2)	P04196_SSTTKPPFKPHGSR_Hex(1)HexNAc(1)Neu5Ac(2)	File25315 Spectrum2224 scans: 6759
P02768	IAEVENDEMPADLPSLAADFVESK	N6(Deamidated)	4853.000	2956.31	2	1479.16	2590.2	-0.0286521	-9.69186	2.6731e-08	112	0.01128	0.002709	365.1322	Hex(1)HexNAc(1)	P02768_IAEVENDEMPADLPSLAADFVESK_Hex(1)HexNAc(1)	File25315 Spectrum20953 scans: 26503
P02768	DESAENCDKSLHTLFGDK	C7(Carbamidomethyl)	3953.000	2576.06	3	859.694	2064.91	-0.0348779	-13.5392	2.4912e-07	112	0.04751	0.002709	511.1901	Fuc(1)Hex(1)HexNAc(1)	P02768_DESAENCDKSLHTLFGDK_Fuc(1)Hex(1)HexNAc(1)	File25315 Spectrum15723 scans: 21007
P01042	SVSEINPTTQMK		3197.000	2280.98	2	1141.5	1333.65	0.00528101	2.31523	4.9283e-08	112	0.006711	0.002709	947.3230	Hex(1)HexNAc(1)Neu5Ac(2)	P01042_SVSEINPTTQMK_Hex(1)HexNAc(1)Neu5Ac(2)	File25315 Spectrum11056 scans: 16096
P36955	QNPASPPEEGSPDPDSTGALVEEEDPFFKVPVNK		4865.000	4571.03	4	1143.76	3622.7	0.00950808	2.08007	6.8569e-07	112	0.0177	0.002709	947.3230	Hex(1)HexNAc(1)Neu5Ac(2)	P36955_QNPASPPEEGSPDPDSTGALVEEEDPFFKVPVNK_Hex(1)HexNAc(1)Neu5Ac(2)	File25315 Spectrum21026 scans: 26580
P05154	KRVEDLHVGATVAPSSR		2710.000	2768.32	3	923.78	1820.99	0.00977648	3.53156	1.3527e-07	111	0.02297	0.002709	947.3230	Hex(1)HexNAc(1)Neu5Ac(2)	P05154_KRVEDLHVGATVAPSSR_Hex(1)HexNAc(1)Neu5Ac(2)	File25315 Spectrum7818 scans: 12668
P02671	TFEEVSGNVSPGTR		4582.000	2338.99	2	1170.5	1478.7	-0.0209579	-8.96025	1.0315e-08	111	0.001241	0.002709	859.3070	Hex(1)HexNAc(2)Neu5Ac(1)	P02671_TFEEVSGNVSPGTR_Hex(1)HexNAc(2)Neu5Ac(1)	File25315 Spectrum19345 scans: 24810
Q13790	DANISQPETTKEGLR		2389.000	2022.96	3	675.327	1657.83	-0.00165721	-0.819202	7.379e-08	111	0.0224	0.002709	365.1322	Hex(1)HexNAc(1)	Q13790_DANISQPETTKEGLR_Hex(1)HexNAc(1)	File25315 Spectrum5736 scans: 10459
P02790	PLPPTSAHGNVAEGETKPDPDVTER	N10(Deamidated)	2947.000	3271.5	4	818.884	2614.25	0.0233363	7.13319	4.8962e-07	111	0.02254	0.002709	656.2276	Hex(1)HexNAc(1)Neu5Ac(1)	P02790_PLPPTSAHGNVAEGETKPDPDVTER_Hex(1)HexNAc(1)Neu5Ac(1)	File25315 Spectrum9394 scans: 14337
P02751	MVQPQSPVAVSQSKPGCYDNGK	C17(Carbamidomethyl);N20(Deamidated)	3026.000	2872.32	2	1437.17	2377.1	0.0387477	13.49	1.3038e-08	111	0.01397	0.002709	494.1748	HexNAc(1)Neu5Ac(1)	P02751_MVQPQSPVAVSQSKPGCYDNGK_HexNAc(1)Neu5Ac(1)	File25315 Spectrum9921 scans: 14891
P02768	ECCEKPLLEKSHCIAEVENDEMPADLPSLAADFVESK	C2(Carbamidomethyl);C3(Carbamidomethyl);C13(Carbamidomethyl)	4682.000	4666.18	5	934.244	4259.94	0.0858205	18.392	4.3673e-11	111	0.003769	0.002709	406.1587	HexNAc(2)	P02768_ECCEKPLLEKSHCIAEVENDEMPADLPSLAADFVESK_HexNAc(2)	File25315 Spectrum19937 scans: 25432
P01042	SVSEINPTTQMK		3053.000	1989.89	2	995.951	1333.65	0.00448101	2.25189	1.3581e-07	110	0.009862	0.002709	656.2276	Hex(1)HexNAc(1)Neu5Ac(1)	P01042_SVSEINPTTQMK_Hex(1)HexNAc(1)Neu5Ac(1)	File25315 Spectrum10100 scans: 15079
P02768	TDLTKVHTECCHGDLLECADDR	C10(Carbamidomethyl);C11(Carbamidomethyl);C18(Carbamidomethyl)	2751.000	3139.26	2	1570.64	2644.13	-0.0512061	-16.3115	1.5356e-08	110	0.0138	0.002709	494.1748	HexNAc(1)Neu5Ac(1)	P02768_TDLTKVHTECCHGDLLECADDR_HexNAc(1)Neu5Ac(1)	File25315 Spectrum8109 scans: 12978
P01834	EAKVQWKVDNALQSGNSQESVTEQDSK		2802.000	3369.56	3	1124.19	3004.44	-0.00791592	-2.34924	1.5006e-06	110	0.06596	0.002709	365.1322	Hex(1)HexNAc(1)	P01834_EAKVQWKVDNALQSGNSQESVTEQDSK_Hex(1)HexNAc(1)	File25315 Spectrum8425 scans: 13319
P01871	VKTHTNISESHPNATFSAVGEASICEDDWNSGER	N6(Deamidated);N13(Deamidated);C25(Carbamidomethyl)	4940.000	4694.99	4	1174.76	3746.64	0.0295496	6.29385	1.8121e-06	110	0.08421	0.003868	947.3230	Hex(1)HexNAc(1)Neu5Ac(2)	P01871_VKTHTNISESHPNATFSAVGEASICEDDWNSGER_Hex(1)HexNAc(1)Neu5Ac(2)	File25315 Spectrum21451 scans: 27031
P01023	GNVNFTVSAEALESQELCGTEVPSVPEHGR	C18(Carbamidomethyl)	4708.000	3415.63	3	1139.55	3212.5	0.0449504	13.1602	3.875e-09	110	0.0004566	0.002709	203.0794	HexNAc(1)	P01023_GNVNFTVSAEALESQELCGTEVPSVPEHGR_HexNAc(1)	File25315 Spectrum20101 scans: 25604
P05546	KGGETAQSADPQWEQLNNK		3387.000	2959.35	3	987.457	2099.99	0.0543603	18.369	2.0768e-07	110	0.01204	0.002709	859.3070	Hex(1)HexNAc(2)Neu5Ac(1)	P05546_KGGETAQSADPQWEQLNNK_Hex(1)HexNAc(2)Neu5Ac(1)	File25315 Spectrum12312 scans: 17425
P02671	SEDGSDCPEAMDLGTLSGIGTLDGFR	C7(Carbamidomethyl);M11(Oxidation)	5009.000	3209.39	2	1605.7	2715.16	0.0464569	14.4753	6.2676e-07	110	0.002459	0.002709	494.1748	HexNAc(1)Neu5Ac(1)	P02671_SEDGSDCPEAMDLGTLSGIGTLDGFR_HexNAc(1)Neu5Ac(1)	File25315 Spectrum21827 scans: 27434
P02787	VPQNTGGKNPDPWAK		2555.000	1973.97	2	987.994	1607.81	0.032574	16.5017	1.0367e-08	110	0.0009267	0.002709	365.1322	Hex(1)HexNAc(1)	P02787_VPQNTGGKNPDPWAK_Hex(1)HexNAc(1)	File25315 Spectrum6814 scans: 11602
P02656	DKFSEFWDLDPEVRPTSAV		4825.000	2893.29	3	965.438	2237.06	-0.000393066	-0.135854	0.00010172	109	0.1896	0.006263	656.2276	Hex(1)HexNAc(1)Neu5Ac(1)	P02656_DKFSEFWDLDPEVRPTSAV_Hex(1)HexNAc(1)Neu5Ac(1)	File25315 Spectrum20792 scans: 26334
P00738	IADDGCPKPPEIAHGYVEHSVR	C6(Carbamidomethyl)	4023.000	3393.55	3	1132.19	2446.17	0.0537281	15.8324	7.5555e-06	108	0.0251	0.002709	947.3230	Hex(1)HexNAc(1)Neu5Ac(2)	P00738_IADDGCPKPPEIAHGYVEHSVR_Hex(1)HexNAc(1)Neu5Ac(2)	File25315 Spectrum16111 scans: 21414
P02790	CWSLAIATPLPPTSAHGNVAEGETKPDPDVTER	C1(Carbamidomethyl)	2581.000	4026.82	3	1343.28	3515.7	-0.0686267	-17.0424	5.8607e-08	108	0.01153	0.002709	511.1901	Fuc(1)Hex(1)HexNAc(1)	P02790_CWSLAIATPLPPTSAHGNVAEGETKPDPDVTER_Fuc(1)Hex(1)HexNAc(1)	File25315 Spectrum6988 scans: 11784
P02656	DKFSEFWDLDPEVRPTSAVA		4815.000	2964.33	2	1483.17	2308.1	0.0046696	1.57526	2.4817e-05	108	0.1651	0.006263	656.2276	Hex(1)HexNAc(1)Neu5Ac(1)	P02656_DKFSEFWDLDPEVRPTSAVA_Hex(1)HexNAc(1)Neu5Ac(1)	File25315 Spectrum20728 scans: 26267
Q14247	VSIAQDDAGADDWETDPDFVNDVSEKEQR	Q5(Deamidated)	4220.000	3745.64	4	937.417	3251.4	0.0626396	16.7233	1.8597e-06	108	0.002136	0.002709	494.1748	HexNAc(1)Neu5Ac(1)	Q14247_VSIAQDDAGADDWETDPDFVNDVSEKEQR_HexNAc(1)Neu5Ac(1)	File25315 Spectrum17307 scans: 22670
A0A0C4DH72	LLLWLPGARCAIQMTQSPSSLSASVGDR	C10(Carbamidomethyl)	2996.000	3872.83	3	1291.95	3013.55	-0.0256751	-6.62955	9.5647e-06	108	0.03907	0.002709	859.3070	Hex(1)HexNAc(2)Neu5Ac(1)	A0A0C4DH72_LLLWLPGARCAIQMTQSPSSLSASVGDR_Hex(1)HexNAc(2)Neu5Ac(1)	File25315 Spectrum9726 scans: 14686
P01042	GLSFNPISDFPDTTSPK		4882.000	2769.2	2	1385.61	1821.88	0.00215238	0.777256	6.4747e-05	108	0.03292	0.002709	947.3230	Hex(1)HexNAc(1)Neu5Ac(2)	P01042_GLSFNPISDFPDTTSPK_Hex(1)HexNAc(1)Neu5Ac(2)	File25315 Spectrum21120 scans: 26682
P02790	LPPTSAHGNVAEGETKPDPDVTER		2922.000	3464.54	4	867.143	2516.21	0.00231571	0.668402	2.2708e-05	107	0.01055	0.002709	947.3230	Hex(1)HexNAc(1)Neu5Ac(2)	P02790_LPPTSAHGNVAEGETKPDPDVTER_Hex(1)HexNAc(1)Neu5Ac(2)	File25315 Spectrum9233 scans: 14167
P02768	PLLEKSHCIAEVENDEMPADLPSLAADFVESK	C8(Carbamidomethyl);M17(Oxidation)	4684.000	4429.97	4	1108.5	3569.69	-0.0291406	-6.57805	7.276e-06	107	0.02668	0.002709	859.3070	Hex(1)HexNAc(2)Neu5Ac(1)	P02768_PLLEKSHCIAEVENDEMPADLPSLAADFVESK_Hex(1)HexNAc(2)Neu5Ac(1)	File25315 Spectrum19953 scans: 25448
P01860	SCDTPPPCPR	C2(Carbamidomethyl);C8(Carbamidomethyl)	2488.000	2132.82	2	1067.42	1185.49	0.00556947	2.61132	4.5202e-05	107	0.07801	0.003868	947.3230	Hex(1)HexNAc(1)Neu5Ac(2)	P01860_SCDTPPPCPR_Hex(1)HexNAc(1)Neu5Ac(2)	File25315 Spectrum6386 scans: 11144
P14209	DGGFDLSDALPDNENKKPTAIPK		4510.000	3388.54	3	1130.52	2441.21	0.00533712	1.57505	0.0003211	106	0.08577	0.003868	947.3230	Hex(1)HexNAc(1)Neu5Ac(2)	P14209_DGGFDLSDALPDNENKKPTAIPK_Hex(1)HexNAc(1)Neu5Ac(2)	File25315 Spectrum18945 scans: 24390
P02768	VENDEMPADLPSLAADFVESK	M6(Oxidation)	4864.000	3240.36	3	1081.13	2292.05	-0.00775671	-2.39378	2.8587e-05	106	0.03801	0.002709	947.3230	Hex(1)HexNAc(1)Neu5Ac(2)	P02768_VENDEMPADLPSLAADFVESK_Hex(1)HexNAc(1)Neu5Ac(2)	File25315 Spectrum21021 scans: 26574
P02768	PLLEKSHCIAEVENDEMPADLPSLAADFVESK	C8(Carbamidomethyl);M17(Oxidation)	4838.000	3772.73	3	1258.59	3569.69	-0.0367955	-9.753	1.2623e-06	106	0.007167	0.002709	203.0794	HexNAc(1)	P02768_PLLEKSHCIAEVENDEMPADLPSLAADFVESK_HexNAc(1)	File25315 Spectrum20867 scans: 26413
P02671	RGSESGIFTNTKESSSHHPGIAEFPSR	N10(Deamidated)	2716.000	3774.74	3	1259.25	2915.38	0.0536586	14.2152	4.3851e-05	105	0.09897	0.004765	859.3070	Hex(1)HexNAc(2)Neu5Ac(1)	P02671_RGSESGIFTNTKESSSHHPGIAEFPSR_Hex(1)HexNAc(2)Neu5Ac(1)	File25315 Spectrum7866 scans: 12718
P04196	SSTTKPPFKPHGSR		1665.000	2182.02	4	546.513	1525.8	-0.00323101	-1.48074	6.3683e-06	105	0.02385	0.002709	656.2276	Hex(1)HexNAc(1)Neu5Ac(1)	P04196_SSTTKPPFKPHGSR_Hex(1)HexNAc(1)Neu5Ac(1)	File25315 Spectrum1212 scans: 5695
P02749	EDAQCIDGTIEVPK	C5(Carbamidomethyl)	4346.000	2085.9	2	1043.96	1573.73	-0.0239092	-11.4623	1.4244e-06	105	0.008288	0.002709	511.1901	Fuc(1)Hex(1)HexNAc(1)	P02749_EDAQCIDGTIEVPK_Fuc(1)Hex(1)HexNAc(1)	File25315 Spectrum18034 scans: 23433
P02671	YGTGSETESPRNPSSAGSWNSGSSGPGSTGNR		2711.000	3622.52	3	1208.52	3127.35	-0.000537748	-0.148446	7.8961e-08	105	0.00645	0.002709	494.1748	HexNAc(1)Neu5Ac(1)	P02671_YGTGSETESPRNPSSAGSWNSGSSGPGSTGNR_HexNAc(1)Neu5Ac(1)	File25315 Spectrum7827 scans: 12677
P02768	AEVENDEMPADLPSLAADFVESK	N5(Deamidated)	4832.000	2989.33	4	748.34	2477.12	0.0203589	6.81054	1.8971e-06	105	0.02227	0.002709	511.1901	Fuc(1)Hex(1)HexNAc(1)	P02768_AEVENDEMPADLPSLAADFVESK_Fuc(1)Hex(1)HexNAc(1)	File25315 Spectrum20833 scans: 26377
P02647	ATEHLSTLSEK		2535.000	1870.85	2	936.432	1214.61	0.00816563	4.36466	0.0005865	105	0.1275	0.005712	656.2276	Hex(1)HexNAc(1)Neu5Ac(1)	P02647_ATEHLSTLSEK_Hex(1)HexNAc(1)Neu5Ac(1)	File25315 Spectrum6692 scans: 11468
P02671	SAGSWNSGSSGPGSTGNR	N6(Deamidated)	2507.000	3490.4	3	1164.47	1665.7	0.0525974	15.0692	1.0349e-05	104	0.07682	0.003868	1823.6453	Fuc(1)Hex(3)HexNAc(3)Neu5Ac(2)	P02671_SAGSWNSGSSGPGSTGNR_Fuc(1)Hex(3)HexNAc(3)Neu5Ac(2)	File25315 Spectrum6506 scans: 11273
P02768	FAEVSKLVTDLTKVHTECCHGDLLECADDR	C18(Carbamidomethyl);C19(Carbamidomethyl);C26(Carbamidomethyl)	3033.000	4173.87	4	1044.47	3517.63	0.0121055	2.9003	7.6545e-07	104	0.03956	0.002709	656.2276	Hex(1)HexNAc(1)Neu5Ac(1)	P02768_FAEVSKLVTDLTKVHTECCHGDLLECADDR_Hex(1)HexNAc(1)Neu5Ac(1)	File25315 Spectrum9967 scans: 14939
P00751	SGQTAICDNGAGYCSNPGIPIGTR	C7(Carbamidomethyl);N9(Deamidated);C14(Carbamidomethyl)	4414.000	2669.2	3	890.742	2466.09	0.034699	12.9998	8.362e-09	104	0.003553	0.002709	203.0794	HexNAc(1)	P00751_SGQTAICDNGAGYCSNPGIPIGTR_HexNAc(1)	File25315 Spectrum18412 scans: 23830
P01871	NISESHPNATFSAVGEASICEDDWNSGER	C20(Carbamidomethyl)	4400.000	3690.61	4	923.661	3178.35	0.0673266	18.2426	1.6237e-07	104	0.0007827	0.002709	511.1901	Fuc(1)Hex(1)HexNAc(1)	P01871_NISESHPNATFSAVGEASICEDDWNSGER_Fuc(1)Hex(1)HexNAc(1)	File25315 Spectrum18333 scans: 23747
A0A075B6I4	GNSNIVGNQGAAWLQQHQGHPPK	N2(Deamidated);Q9(Deamidated)	4046.000	3298.52	3	1100.51	2439.17	0.0413019	12.5214	4.442e-07	103	0.005238	0.002709	859.3070	Hex(1)HexNAc(2)Neu5Ac(1)	A0A075B6I4_GNSNIVGNQGAAWLQQHQGHPPK_Hex(1)HexNAc(2)Neu5Ac(1)	File25315 Spectrum16248 scans: 21558
P02774	MPAAQLPELPDVELPTNKDVCDPGNTK	C21(Carbamidomethyl)	4597.000	3152.53	3	1051.85	2948.43	0.0202431	6.42122	2.135e-11	103	0.0001293	0.002709	203.0794	HexNAc(1)	P02774_MPAAQLPELPDVELPTNKDVCDPGNTK_HexNAc(1)	File25315 Spectrum19431 scans: 24900
P00738	GNDVTDIADDGCPKPPEIAHGYVEHSVR	N2(Deamidated);C12(Carbamidomethyl)	3735.000	3251.47	4	813.875	3048.39	0.00516631	1.58891	5.4573e-08	103	0.00519	0.002709	203.0794	HexNAc(1)	P00738_GNDVTDIADDGCPKPPEIAHGYVEHSVR_HexNAc(1)	File25315 Spectrum14393 scans: 19610
P13747	HTQDTELVETRPAGDGTFQK	Q3(Deamidated)	3463.000	2637.19	2	1319.6	2230.05	-0.0259261	-9.83098	1.2375e-05	103	0.03333	0.002709	406.1587	HexNAc(2)	P13747_HTQDTELVETRPAGDGTFQK_HexNAc(2)	File25315 Spectrum12825 scans: 17964
P13671	SHHSEDLCVFDTDSNDYFTSPACK	C8(Carbamidomethyl);N15(Deamidated);C23(Carbamidomethyl)	4342.000	4656.75	4	1165.19	2832.13	-0.0252135	-5.41439	2.0283e-05	103	0.01683	0.002709	1823.6453	Fuc(1)Hex(3)HexNAc(3)Neu5Ac(2)	P13671_SHHSEDLCVFDTDSNDYFTSPACK_Fuc(1)Hex(3)HexNAc(3)Neu5Ac(2)	File25315 Spectrum18009 scans: 23407
P01834	ALQSGNSQESVTEQDSK	Q3(Deamidated)	2670.000	2173.92	2	1087.96	1807.81	-0.0268019	-12.3288	2.9229e-07	102	0.02694	0.002709	365.1322	Hex(1)HexNAc(1)	P01834_ALQSGNSQESVTEQDSK_Hex(1)HexNAc(1)	File25315 Spectrum7557 scans: 12394
P01023	SDCHGEDSQAFCEK	C3(Carbamidomethyl);C12(Carbamidomethyl)	2483.000	2162.8	2	1082.41	1668.61	0.0100128	4.62957	9.6459e-08	102	0.01083	0.002709	494.1748	HexNAc(1)Neu5Ac(1)	P01023_SDCHGEDSQAFCEK_HexNAc(1)Neu5Ac(1)	File25315 Spectrum6357 scans: 11113
P00747	CSGTEASVVAPPPVVLLPDVETPSEEDCMFGNGK	C1(Carbamidomethyl);C28(Carbamidomethyl);N32(Deamidated)	5144.000	4245.83	3	1416.28	3588.63	-0.0319003	-7.51334	4.5429e-06	102	0.03739	0.002709	656.2276	Hex(1)HexNAc(1)Neu5Ac(1)	P00747_CSGTEASVVAPPPVVLLPDVETPSEEDCMFGNGK_Hex(1)HexNAc(1)Neu5Ac(1)	File25315 Spectrum22570 scans: 28240
P02671	SWNSGSSGTGSTGNQNPGSPRPGSTGTWNPGSSER	N3(Deamidated)	3315.000	4105.77	3	1369.6	3448.49	0.0459581	11.1935	2.2134e-08	101	0.0006291	0.002709	656.2276	Hex(1)HexNAc(1)Neu5Ac(1)	P02671_SWNSGSSGTGSTGNQNPGSPRPGSTGTWNPGSSER_Hex(1)HexNAc(1)Neu5Ac(1)	File25315 Spectrum11828 scans: 16917
P02656	DKFSEFWDLDPEVRPTSAV		4908.000	3184.39	3	1062.47	2237.06	0.00650693	2.04338	8.9158e-05	101	0.09769	0.004765	947.3230	Hex(1)HexNAc(1)Neu5Ac(2)	P02656_DKFSEFWDLDPEVRPTSAV_Hex(1)HexNAc(1)Neu5Ac(2)	File25315 Spectrum21271 scans: 26841
P04196	SSTTKPPFKPHGSR		1651.000	1890.93	4	473.74	1525.8	-0.00263101	-1.39139	3.0108e-07	101	0.02869	0.002709	365.1322	Hex(1)HexNAc(1)	P04196_SSTTKPPFKPHGSR_Hex(1)HexNAc(1)	File25315 Spectrum1110 scans: 5587
P02768	HVKLVNEVTEFAKTCVADESAENCDK	N6(Deamidated);C15(Carbamidomethyl);C24(Carbamidomethyl)	1960.000	3852.62	4	964.162	2993.37	-0.0643575	-16.7049	3.4893e-07	100	0.002959	0.002709	859.3070	Hex(1)HexNAc(2)Neu5Ac(1)	P02768_HVKLVNEVTEFAKTCVADESAENCDK_Hex(1)HexNAc(2)Neu5Ac(1)	File25315 Spectrum3010 scans: 7595
P02790	AEGETKPDPDVTER		2175.000	1949.91	2	975.961	1542.72	0.030098	15.4356	7.7235e-06	100	0.01056	0.002709	406.1587	HexNAc(2)	P02790_AEGETKPDPDVTER_HexNAc(2)	File25315 Spectrum4343 scans: 8996
Q14624	IPKPEASFSPR		3386.000	2174.99	3	726.003	1227.66	0.00209858	0.964873	5.4185e-05	100	0.06928	0.002709	947.3230	Hex(1)HexNAc(1)Neu5Ac(2)	Q14624_IPKPEASFSPR_Hex(1)HexNAc(1)Neu5Ac(2)	File25315 Spectrum12299 scans: 17412
P02671	QFTSSTSYNRGDSTFESK		2977.000	2697.13	3	900.051	2040.9	0.00169295	0.627684	7.6245e-06	100	0.108	0.004765	656.2276	Hex(1)HexNAc(1)Neu5Ac(1)	P02671_QFTSSTSYNRGDSTFESK_Hex(1)HexNAc(1)Neu5Ac(1)	File25315 Spectrum9594 scans: 14547
P08519	RGTDSCQGDSGGPLVCFEKDK	C6(Carbamidomethyl);C16(Carbamidomethyl)	4137.000	2806.19	3	936.404	2312.02	0.000426586	0.152016	6.0406e-07	100	0.02315	0.002709	494.1748	HexNAc(1)Neu5Ac(1)	P08519_RGTDSCQGDSGGPLVCFEKDK_HexNAc(1)Neu5Ac(1)	File25315 Spectrum16804 scans: 22142
Q14624	MVVTKPDDQEQSQVAEKPMEGESR		2613.000	2921.35	3	974.789	2717.26	-0.000442603	-0.151507	3.6997e-07	99	0.004468	0.002709	203.0794	HexNAc(1)	Q14624_MVVTKPDDQEQSQVAEKPMEGESR_HexNAc(1)	File25315 Spectrum7186 scans: 11992
P02768	LKECCEKPLLEKSHCIAEVENDEMPADLPSLAADFVESK	C4(Carbamidomethyl);C5(Carbamidomethyl);C15(Carbamidomethyl);N21(Deamidated);M24(Oxidation)	4537.000	4722.22	5	945.451	4518.1	0.0427946	9.06239	1.4937e-05	99	0.02719	0.002709	203.0794	HexNAc(1)	P02768_LKECCEKPLLEKSHCIAEVENDEMPADLPSLAADFVESK_HexNAc(1)	File25315 Spectrum19098 scans: 24551
P01860::P01857	CNVNHKPSNTKVDK	C1(Carbamidomethyl);N4(Deamidated)	1721.000	2005.95	2	1003.98	1640.79	0.0285935	14.2543	3.2956e-07	99	0.0168	0.002709	365.1322	Hex(1)HexNAc(1)	P01860::P01857_CNVNHKPSNTKVDK_Hex(1)HexNAc(1)	File25315 Spectrum1547 scans: 6048
P01023	RKYSDASDCHGEDSQAFCEK	C9(Carbamidomethyl);C18(Carbamidomethyl)	2497.000	4212.68	4	1054.18	2388.97	0.064072	15.2093	1.1106e-05	99	0.1269	0.004765	1823.6453	Fuc(1)Hex(3)HexNAc(3)Neu5Ac(2)	P01023_RKYSDASDCHGEDSQAFCEK_Fuc(1)Hex(3)HexNAc(3)Neu5Ac(2)	File25315 Spectrum6436 scans: 11198
P02671	VTSEDGSDCPEAMDLGTLSGIGTLDGFR	C9(Carbamidomethyl)	4726.000	3265.39	3	1089.47	2899.29	-0.0266659	-8.16623	2.5427e-07	99	0.006414	0.002709	365.1322	Hex(1)HexNAc(1)	P02671_VTSEDGSDCPEAMDLGTLSGIGTLDGFR_Hex(1)HexNAc(1)	File25315 Spectrum20222 scans: 25731
P01859::P01861	CNVDHKPSNTKVDK	C1(Carbamidomethyl)	1721.000	2005.95	2	1003.98	1640.79	0.0285935	14.2543	3.2956e-07	99	0.0168	0.002709	365.1322	Hex(1)HexNAc(1)	P01859::P01861_CNVDHKPSNTKVDK_Hex(1)HexNAc(1)	File25315 Spectrum1547 scans: 6048
P01834	ALQSGNSQESVTEQDSK	Q3(Deamidated);N6(Deamidated)	2691.000	3633.4	3	1212.14	1808.79	-0.0369939	-10.1816	0.00055816	98	0.09409	0.004765	1823.6453	Fuc(1)Hex(3)HexNAc(3)Neu5Ac(2)	P01834_ALQSGNSQESVTEQDSK_Fuc(1)Hex(3)HexNAc(3)Neu5Ac(2)	File25315 Spectrum7697 scans: 12541
A0A075B6P5	DRFSGSGSGTDFTLK		4055.000	2085.96	3	696.328	1573.74	0.0307518	14.7423	1.3098e-06	98	0.01704	0.002709	511.1901	Fuc(1)Hex(1)HexNAc(1)	A0A075B6P5_DRFSGSGSGTDFTLK_Fuc(1)Hex(1)HexNAc(1)	File25315 Spectrum16298 scans: 21611
P19827	SALQPSPTHSSSNTQR		1708.000	2061.94	3	688.322	1696.81	-0.000604131	-0.292991	4.9089e-06	97	0.02515	0.002709	365.1322	Hex(1)HexNAc(1)	P19827_SALQPSPTHSSSNTQR_Hex(1)HexNAc(1)	File25315 Spectrum1468 scans: 5965
P07996	ACPPGYSGNGIQCTDVDECKEVPDACFNHNGEHR	C2(Carbamidomethyl);C13(Carbamidomethyl);C19(Carbamidomethyl);C26(Carbamidomethyl)	3752.000	4092.6	4	1024.16	3889.59	-0.068645	-16.7729	1.1469e-05	97	0.01146	0.002709	203.0794	HexNAc(1)	P07996_ACPPGYSGNGIQCTDVDECKEVPDACFNHNGEHR_HexNAc(1)	File25315 Spectrum14502 scans: 19725
P02774	ESNSPFPVHPGTAECCTK	N3(Deamidated);C15(Carbamidomethyl);C16(Carbamidomethyl)	3209.000	2530.07	3	844.364	2017.85	0.0271258	10.7214	3.4671e-05	97	0.03959	0.002709	511.1901	Fuc(1)Hex(1)HexNAc(1)	P02774_ESNSPFPVHPGTAECCTK_Fuc(1)Hex(1)HexNAc(1)	File25315 Spectrum11137 scans: 16181
Q14624	AVSRVMNMKIEETTMTTQTPAPIQAPSAILPLPGQSVER	N7(Deamidated);Q18(Deamidated);Q24(Deamidated)	4683.000	4561.17	4	1141.3	4195.12	-0.089242	-19.5656	8.5849e-05	96	0.0242	0.002709	365.1322	Hex(1)HexNAc(1)	Q14624_AVSRVMNMKIEETTMTTQTPAPIQAPSAILPLPGQSVER_Hex(1)HexNAc(1)	File25315 Spectrum19944 scans: 25439
Q96PD5	SSPGLRDGSPDVTTADIGANTPDATK		3413.000	2908.3	3	970.44	2542.21	-0.0504018	-17.3303	2.0363e-09	96	0.01533	0.002709	365.1322	Hex(1)HexNAc(1)	Q96PD5_SSPGLRDGSPDVTTADIGANTPDATK_Hex(1)HexNAc(1)	File25315 Spectrum12488 scans: 17610
P02768	AEVSKLVTDLTKVHTECCHGDLLECADDR	C17(Carbamidomethyl);C18(Carbamidomethyl);C25(Carbamidomethyl)	2758.000	4026.8	3	1343.27	3370.56	0.00979587	2.43267	7.7827e-06	96	0.08809	0.003868	656.2276	Hex(1)HexNAc(1)Neu5Ac(1)	P02768_AEVSKLVTDLTKVHTECCHGDLLECADDR_Hex(1)HexNAc(1)Neu5Ac(1)	File25315 Spectrum8145 scans: 13022
P01859	YPSDISVEWESNGQPENNYK		4430.000	2559.12	2	1280.57	2355.03	0.0104437	4.08096	6.4186e-06	96	0.03518	0.002709	203.0794	HexNAc(1)	P01859_YPSDISVEWESNGQPENNYK_HexNAc(1)	File25315 Spectrum18501 scans: 23924
P02768	HGDLLECADDRADLAKYICENQDSISSK	C7(Carbamidomethyl);C19(Carbamidomethyl);N21(Deamidated)	4105.000	4171.79	4	1043.95	3223.44	0.0236544	5.67008	3.842e-06	96	0.04114	0.002709	947.3230	Hex(1)HexNAc(1)Neu5Ac(2)	P02768_HGDLLECADDRADLAKYICENQDSISSK_Hex(1)HexNAc(1)Neu5Ac(2)	File25315 Spectrum16600 scans: 21928
A0A075B6S5	LLLLWLPDTRCDIQMTQSPSSLSASVGDR	C11(Carbamidomethyl);Q14(Deamidated);M15(Oxidation);Q17(Deamidated)	3424.000	3787.76	3	1263.6	3276.6	-0.0260582	-6.87958	0.00066218	96	0.06015	0.002709	511.1901	Fuc(1)Hex(1)HexNAc(1)	A0A075B6S5_LLLLWLPDTRCDIQMTQSPSSLSASVGDR_Fuc(1)Hex(1)HexNAc(1)	File25315 Spectrum12561 scans: 17687
P01009	AAQKTDTSHHDQDHPTFNK		1950.000	2689.17	3	897.399	2176.99	-0.00670535	-2.49346	1.4095e-07	96	0.007067	0.002709	511.1901	Fuc(1)Hex(1)HexNAc(1)	P01009_AAQKTDTSHHDQDHPTFNK_Fuc(1)Hex(1)HexNAc(1)	File25315 Spectrum2950 scans: 7532
P02671	MRIVCLVLSVVGTAWTADSGEGDFLAEGGGVR	M1(Oxidation);C5(Carbamidomethyl)	4193.000	3744.73	3	1249.25	3337.64	-0.0744947	-19.8932	0.00010418	95	0.05203	0.002709	406.1587	HexNAc(2)	P02671_MRIVCLVLSVVGTAWTADSGEGDFLAEGGGVR_HexNAc(2)	File25315 Spectrum17150 scans: 22505
P01009	AAQKTDTSHHDQDHPTFNK	Q3(Deamidated)	1980.000	2835.21	2	1418.61	2177.97	0.00755552	2.66489	3.7841e-06	95	0.05716	0.002709	656.2276	Hex(1)HexNAc(1)Neu5Ac(1)	P01009_AAQKTDTSHHDQDHPTFNK_Hex(1)HexNAc(1)Neu5Ac(1)	File25315 Spectrum3141 scans: 7734
P14625	DTQHIWESDSNEFSVIADPR	Q3(Deamidated)	4425.000	2712.2	3	905.072	2346.04	0.0202682	7.47297	8.5859e-08	95	0.02328	0.002709	365.1322	Hex(1)HexNAc(1)	P14625_DTQHIWESDSNEFSVIADPR_Hex(1)HexNAc(1)	File25315 Spectrum18471 scans: 23892
P01859	SSVVTVPSSNFGTQTYTCNVDHKPSNTK	N10(Deamidated);C18(Carbamidomethyl);N26(Deamidated)	4175.000	3259.53	4	815.891	3056.4	0.0517849	15.8872	1.2353e-07	95	0.01528	0.002709	203.0794	HexNAc(1)	P01859_SSVVTVPSSNFGTQTYTCNVDHKPSNTK_HexNAc(1)	File25315 Spectrum17035 scans: 22384
A0A0C4DH72	RCAIQMTQSPSSLSASVGDR	C2(Carbamidomethyl);Q5(Deamidated);M6(Oxidation)	2838.000	2371.08	3	791.366	2167	-0.00466369	-1.96691	7.0351e-06	94	0.02797	0.002709	203.0794	HexNAc(1)	A0A0C4DH72_RCAIQMTQSPSSLSASVGDR_HexNAc(1)	File25315 Spectrum8674 scans: 13580
P01861	TKTYTCNVDHKPSNTKVDK	C6(Carbamidomethyl)	2331.000	2439.15	3	814.058	2235.1	-0.0260786	-10.6917	6.271e-09	94	0.0577	0.002709	203.0794	HexNAc(1)	P01861_TKTYTCNVDHKPSNTKVDK_HexNAc(1)	File25315 Spectrum5355 scans: 10059
P07357	NGDQDCLDGSDEDDCEDVR	C6(Carbamidomethyl);C15(Carbamidomethyl)	3111.000	2724	3	909.008	2212.78	0.035472	13.022	3.9927e-06	94	0.04362	0.002709	511.1901	Fuc(1)Hex(1)HexNAc(1)	P07357_NGDQDCLDGSDEDDCEDVR_Fuc(1)Hex(1)HexNAc(1)	File25315 Spectrum10491 scans: 15499
P02790	TPLPPTSAHGNVAEGETKPDPDVTER	N11(Deamidated)	3131.000	3122.45	3	1041.82	2715.3	-0.00776577	-2.48707	8.0632e-06	94	0.06088	0.002709	406.1587	HexNAc(2)	P02790_TPLPPTSAHGNVAEGETKPDPDVTER_HexNAc(2)	File25315 Spectrum10621 scans: 15638
Q14624	IPKPEASFSPR		3184.000	1883.89	2	942.954	1227.66	0.00427505	2.26926	1.4389e-06	94	0.03632	0.002709	656.2276	Hex(1)HexNAc(1)Neu5Ac(1)	Q14624_IPKPEASFSPR_Hex(1)HexNAc(1)Neu5Ac(1)	File25315 Spectrum10976 scans: 16012
P01860	TQTYTCNVNHKPSNTKVDK	C6(Carbamidomethyl);N9(Deamidated)	2331.000	2439.15	3	814.058	2235.06	0.0103069	4.2256	6.271e-09	94	0.01527	0.002709	203.0794	HexNAc(1)	P01860_TQTYTCNVNHKPSNTKVDK_HexNAc(1)	File25315 Spectrum5355 scans: 10059
P19823	AQGSQVLESTPPPHVMR	Q5(Deamidated);M16(Oxidation)	2893.000	2507.15	3	836.723	1849.9	0.0177551	7.08177	0.0001338	94	0.0506	0.002709	656.2276	Hex(1)HexNAc(1)Neu5Ac(1)	P19823_AQGSQVLESTPPPHVMR_Hex(1)HexNAc(1)Neu5Ac(1)	File25315 Spectrum9040 scans: 13964
P02768	VNEVTEFAKTCVADESAENCDK	N2(Deamidated);C11(Carbamidomethyl);C20(Carbamidomethyl)	2962.000	2922.2	3	975.073	2516.07	-0.0307282	-10.5154	1.983e-06	94	0.04283	0.002709	406.1587	HexNAc(2)	P02768_VNEVTEFAKTCVADESAENCDK_HexNAc(2)	File25315 Spectrum9492 scans: 14440
P01859	TQTYTCNVDHKPSNTKVDK	C6(Carbamidomethyl)	2331.000	2439.15	3	814.058	2235.06	0.0103069	4.2256	6.271e-09	94	0.01527	0.002709	203.0794	HexNAc(1)	P01859_TQTYTCNVDHKPSNTKVDK_HexNAc(1)	File25315 Spectrum5355 scans: 10059
P01834	SQESVTEQDSK	Q2(Deamidated)	2380.000	2185.88	3	729.633	1237.53	0.0214966	9.83431	0.00083553	93	0.05006	0.002709	947.3230	Hex(1)HexNAc(1)Neu5Ac(2)	P01834_SQESVTEQDSK_Hex(1)HexNAc(1)Neu5Ac(2)	File25315 Spectrum5669 scans: 10389
P02768	HCIAEVENDEMPADLPSLAADFVESK	C2(Carbamidomethyl)	4848.000	3089.34	2	1545.68	2886.31	-0.040328	-13.0539	1.1051e-05	93	0.03714	0.002709	203.0794	HexNAc(1)	P02768_HCIAEVENDEMPADLPSLAADFVESK_HexNAc(1)	File25315 Spectrum20924 scans: 26473
P01011	GFCPAVLCHPNSPLDEENLTQENQDR	C3(Carbamidomethyl);C8(Carbamidomethyl)	3371.000	3446.51	3	1149.84	3039.35	0.00381915	1.10812	4.6095e-06	93	0.02114	0.002709	406.1587	HexNAc(2)	P01011_GFCPAVLCHPNSPLDEENLTQENQDR_HexNAc(2)	File25315 Spectrum12209 scans: 17317
P02768	CCHGDLLECADDRADLAKYICENQDSISSK	C1(Carbamidomethyl);C2(Carbamidomethyl);C9(Carbamidomethyl);C21(Carbamidomethyl)	4487.000	4053.75	4	1014.45	3542.52	0.0445422	10.9879	8.0835e-05	93	0.02105	0.002709	511.1901	Fuc(1)Hex(1)HexNAc(1)	P02768_CCHGDLLECADDRADLAKYICENQDSISSK_Fuc(1)Hex(1)HexNAc(1)	File25315 Spectrum18811 scans: 24249
P00450	APDQVDKEDEDFQESNK	Q4(Deamidated)	3314.000	2489.06	3	830.693	1993.84	0.0403276	16.202	0.00094123	93	0.1184	0.004765	494.1748	HexNAc(1)Neu5Ac(1)	P00450_APDQVDKEDEDFQESNK_HexNAc(1)Neu5Ac(1)	File25315 Spectrum11819 scans: 16908
P04196	SSTTKPPFKPHGSR		1651.000	1729.89	3	577.636	1525.8	0.00377682	2.18327	1.444e-07	92	0.01575	0.002709	203.0794	HexNAc(1)	P04196_SSTTKPPFKPHGSR_HexNAc(1)	File25315 Spectrum1109 scans: 5586
P02768	DLLECADDRADLAKYICENQDSISSK	C5(Carbamidomethyl);C17(Carbamidomethyl)	2569.000	4852.11	4	1214.03	3028.38	0.0846142	17.4387	0.0035041	92	0.05007	0.002709	1823.6453	Fuc(1)Hex(3)HexNAc(3)Neu5Ac(2)	P02768_DLLECADDRADLAKYICENQDSISSK_Fuc(1)Hex(3)HexNAc(3)Neu5Ac(2)	File25315 Spectrum6915 scans: 11708
Q13790	DANISQPETTK		2362.000	1858.81	2	930.41	1202.58	0.000351131	0.188902	4.6384e-06	92	0.03498	0.002709	656.2276	Hex(1)HexNAc(1)Neu5Ac(1)	Q13790_DANISQPETTK_Hex(1)HexNAc(1)Neu5Ac(1)	File25315 Spectrum5552 scans: 10266
P19827	ADQDGLKPTIDKPSEDSPPLEMLGPR		4311.000	3009.45	3	1004.16	2805.39	-0.0137723	-4.57634	8.064e-07	92	0.004866	0.002709	203.0794	HexNAc(1)	P19827_ADQDGLKPTIDKPSEDSPPLEMLGPR_HexNAc(1)	File25315 Spectrum17839 scans: 23229
P23142	CKDIDECESGIHNCLPDFICQNTLGSFR	C1(Carbamidomethyl);C7(Carbamidomethyl);N13(Deamidated);C14(Carbamidomethyl);C20(Carbamidomethyl)	4712.000	3751.54	3	1251.52	3385.45	-0.0443795	-11.8297	5.2993e-06	91	0.03189	0.002709	365.1322	Hex(1)HexNAc(1)	P23142_CKDIDECESGIHNCLPDFICQNTLGSFR_Hex(1)HexNAc(1)	File25315 Spectrum20124 scans: 25628
P02671	VVGTAWTADSGEGDFLAEGGGVR		4186.000	3110.3	3	1037.78	2250.06	-0.0607879	-19.5441	1.2679e-06	91	0.01169	0.002709	859.3070	Hex(1)HexNAc(2)Neu5Ac(1)	P02671_VVGTAWTADSGEGDFLAEGGGVR_Hex(1)HexNAc(2)Neu5Ac(1)	File25315 Spectrum17105 scans: 22458
P01602	WLPGAKCDIQMTQSPSTLSASVGDR	C7(Carbamidomethyl);Q10(Deamidated);M11(Oxidation)	3966.000	3580.64	3	1194.55	2721.27	0.0572553	15.9902	0.0002427	91	0.07692	0.003868	859.3070	Hex(1)HexNAc(2)Neu5Ac(1)	P01602_WLPGAKCDIQMTQSPSTLSASVGDR_Hex(1)HexNAc(2)Neu5Ac(1)	File25315 Spectrum15795 scans: 21082
P02787	IECVSAETTEDCIAK	C3(Carbamidomethyl);C12(Carbamidomethyl)	3259.000	2584.1	3	862.372	1724.76	0.0289691	11.2105	0.00017125	91	0.2009	0.006263	859.3070	Hex(1)HexNAc(2)Neu5Ac(1)	P02787_IECVSAETTEDCIAK_Hex(1)HexNAc(2)Neu5Ac(1)	File25315 Spectrum11457 scans: 16528
P02768	DRADLAKYICENQDSISSK	C10(Carbamidomethyl)	2584.000	2723.18	3	908.735	2212.04	-0.0505401	-18.5592	4.7893e-08	91	0.01522	0.002709	511.1901	Fuc(1)Hex(1)HexNAc(1)	P02768_DRADLAKYICENQDSISSK_Fuc(1)Hex(1)HexNAc(1)	File25315 Spectrum7004 scans: 11801
P02768	DLTKVHTECCHGDLLECADDRADLAK	C9(Carbamidomethyl);C10(Carbamidomethyl);C17(Carbamidomethyl)	3082.000	3553.55	3	1185.52	3041.36	-0.0114017	-3.20855	7.908e-05	91	0.1172	0.004765	511.1901	Fuc(1)Hex(1)HexNAc(1)	P02768_DLTKVHTECCHGDLLECADDRADLAK_Fuc(1)Hex(1)HexNAc(1)	File25315 Spectrum10289 scans: 15277
P01876	HVKHYTNPSQDVTVPCPVPSTPPTPSPSTPPTPSPSCCHPR	C37(Carbamidomethyl);C38(Carbamidomethyl);C16(Carbamidomethyl)	3614.000	4907.19	4	1227.81	4500.1	-0.0727975	-14.8349	5.8181e-05	90	0.01258	0.002709	406.1587	HexNAc(2)	P01876_HVKHYTNPSQDVTVPCPVPSTPPTPSPSTPPTPSPSCCHPR_HexNAc(2)	File25315 Spectrum13699 scans: 18882
P02751	QMMSCTCLGNGKGEFK	M2(Oxidation);M3(Oxidation);C5(Carbamidomethyl);C7(Carbamidomethyl);N10(Deamidated)	3150.000	2373.92	3	792.315	1879.76	-0.00920483	-3.87748	3.5301e-06	90	0.02389	0.002709	494.1748	HexNAc(1)Neu5Ac(1)	P02751_QMMSCTCLGNGKGEFK_HexNAc(1)Neu5Ac(1)	File25315 Spectrum10741 scans: 15765
P02768	DLTKVHTECCHGDLLECADDRADLAK	C9(Carbamidomethyl);C10(Carbamidomethyl);C17(Carbamidomethyl)	3335.000	3448.59	4	863.154	3041.36	0.0596218	17.2888	1.586e-05	90	0.1013	0.004765	406.1587	HexNAc(2)	P02768_DLTKVHTECCHGDLLECADDRADLAK_HexNAc(2)	File25315 Spectrum11966 scans: 17062
P01601::P01599	PGARCDIQMTQSPSSLSASVGDR	C5(Carbamidomethyl);M9(Oxidation)	3604.000	2842.32	3	948.447	2435.12	0.0415813	14.6293	3.7758e-06	90	0.00748	0.002709	406.1587	HexNAc(2)	P01601::P01599_PGARCDIQMTQSPSSLSASVGDR_HexNAc(2)	File25315 Spectrum13646 scans: 18826
P00738	GDKLPECEADDGCPKPPEIAHGYVEHSVR	C7(Carbamidomethyl);C13(Carbamidomethyl)	3698.000	3772.73	4	944.19	3261.48	0.0580835	15.3956	9.5417e-06	90	0.01747	0.002709	511.1901	Fuc(1)Hex(1)HexNAc(1)	P00738_GDKLPECEADDGCPKPPEIAHGYVEHSVR_Fuc(1)Hex(1)HexNAc(1)	File25315 Spectrum14168 scans: 19374
A0A075B6S5	LLLLWLPDTRCDIQMTQSPSSLSASVGDR	C11(Carbamidomethyl);Q14(Deamidated);M15(Oxidation)	2991.000	3931.83	3	1311.62	3275.62	-0.0138426	-3.52066	6.7e-05	90	0.04065	0.002709	656.2276	Hex(1)HexNAc(1)Neu5Ac(1)	A0A075B6S5_LLLLWLPDTRCDIQMTQSPSSLSASVGDR_Hex(1)HexNAc(1)Neu5Ac(1)	File25315 Spectrum9688 scans: 14646
P02768	EVTEFAKTCVADESAENCDK	C9(Carbamidomethyl);C18(Carbamidomethyl)	4604.000	2797.2	3	933.408	2301.97	0.0518601	18.54	6.1886e-07	90	0.03553	0.002709	494.1748	HexNAc(1)Neu5Ac(1)	P02768_EVTEFAKTCVADESAENCDK_HexNAc(1)Neu5Ac(1)	File25315 Spectrum19469 scans: 24940
P01042	KESNEELTESCETKK	N4(Deamidated);C11(Carbamidomethyl)	2035.000	2469	2	1235.51	1811.81	-0.04251	-17.2175	0.0017101	89	0.1346	0.005712	656.2276	Hex(1)HexNAc(1)Neu5Ac(1)	P01042_KESNEELTESCETKK_Hex(1)HexNAc(1)Neu5Ac(1)	File25315 Spectrum3474 scans: 8084
P01834	ALQSGNSQESVTEQDSK	N6(Deamidated)	2784.000	2214.97	2	1108.49	1807.81	-0.00350186	-1.581	0.00016601	89	0.05663	0.002709	406.1587	HexNAc(2)	P01834_ALQSGNSQESVTEQDSK_HexNAc(2)	File25315 Spectrum8312 scans: 13200
P02774	ACCAEGADPDCYDTRTSALSAKSCESNSPFPVHPGTAECCTK	C2(Carbamidomethyl);C3(Carbamidomethyl);C39(Carbamidomethyl);C40(Carbamidomethyl);C11(Carbamidomethyl);C24(Carbamidomethyl);N27(Deamidated)	3207.000	4868.06	4	1218.02	4664.89	0.0925974	19.0214	0.002157	89	0.07936	0.003868	203.0794	HexNAc(1)	P02774_ACCAEGADPDCYDTRTSALSAKSCESNSPFPVHPGTAECCTK_HexNAc(1)	File25315 Spectrum11125 scans: 16168
P02679	NGMQFSTWDNDNDKFEGNCAEQDGSGWWMNK	N1(Deamidated);M3(Oxidation);N12(Deamidated);C19(Carbamidomethyl)	4171.000	4050.6	4	1013.66	3685.41	0.0538185	13.2866	2.0539e-05	89	0.01733	0.002709	365.1322	Hex(1)HexNAc(1)	P02679_NGMQFSTWDNDNDKFEGNCAEQDGSGWWMNK_Hex(1)HexNAc(1)	File25315 Spectrum17013 scans: 22361
P10643	ENPLTQAVPK		3377.000	2042.92	2	1022.47	1095.59	0.00182332	0.892507	0.00049229	89	0.1785	0.006263	947.3230	Hex(1)HexNAc(1)Neu5Ac(2)	P10643_ENPLTQAVPK_Hex(1)HexNAc(1)Neu5Ac(2)	File25315 Spectrum12247 scans: 17357
P02774	AKLPDATPTELAK		3355.000	2301.08	3	768.034	1353.75	0.00558962	2.42913	0.001526	89	0.1215	0.004765	947.3230	Hex(1)HexNAc(1)Neu5Ac(2)	P02774_AKLPDATPTELAK_Hex(1)HexNAc(1)Neu5Ac(2)	File25315 Spectrum12101 scans: 17204
Q76LX8	DGEEILLDTQCQGLPRPEPQEACSLEPCPPR	C11(Carbamidomethyl);C23(Carbamidomethyl);C28(Carbamidomethyl)	4490.000	4101.84	4	1026.47	3590.64	0.00402712	0.981784	0.0006971	88	0.02369	0.002709	511.1901	Fuc(1)Hex(1)HexNAc(1)	Q76LX8_DGEEILLDTQCQGLPRPEPQEACSLEPCPPR_Fuc(1)Hex(1)HexNAc(1)	File25315 Spectrum18832 scans: 24271
P01834	AKVQWKVDNALQSGNSQESVTEQDSK	Q4(Deamidated);N15(Deamidated)	2810.000	3736.67	5	748.342	2877.36	0.00229309	0.613671	0.00016255	88	0.1169	0.004765	859.3070	Hex(1)HexNAc(2)Neu5Ac(1)	P01834_AKVQWKVDNALQSGNSQESVTEQDSK_Hex(1)HexNAc(2)Neu5Ac(1)	File25315 Spectrum8479 scans: 13375
P02671	GPGSTGSWNSGSSGTGSTGNQNPGSPRPGSTGTWNPGSSER	N9(Deamidated)	3235.000	4107.8	3	1370.27	3904.69	0.0365648	8.9013	0.00013831	88	0.03394	0.002709	203.0794	HexNAc(1)	P02671_GPGSTGSWNSGSSGTGSTGNQNPGSPRPGSTGTWNPGSSER_HexNAc(1)	File25315 Spectrum11297 scans: 16357
P06312	SLLLWISGAYGDIVMTQSPDSLAVSLGER	M15(Oxidation)	4572.000	3952.9	4	989.231	3093.57	0.0202418	5.12076	5.9607e-05	88	0.01216	0.002709	859.3070	Hex(1)HexNAc(2)Neu5Ac(1)	P06312_SLLLWISGAYGDIVMTQSPDSLAVSLGER_Hex(1)HexNAc(2)Neu5Ac(1)	File25315 Spectrum19292 scans: 24754
P02671	FRPDSPGSGNARPNNPDWGTFEEVSGNVSPGTR		4306.000	4157.84	4	1040.47	3500.61	0.00345439	0.830814	0.00010374	88	0.0293	0.002709	656.2276	Hex(1)HexNAc(1)Neu5Ac(1)	P02671_FRPDSPGSGNARPNNPDWGTFEEVSGNVSPGTR_Hex(1)HexNAc(1)Neu5Ac(1)	File25315 Spectrum17812 scans: 23200
A0A0C4DH72::P01597::A0A075B6S5::P01601::P01599	QMTQSPSSLSASVGDR	M2(Oxidation)	3803.000	1868.84	2	935.426	1665.76	-0.00476595	-2.55022	4.5628e-06	88	0.009709	0.002709	203.0794	HexNAc(1)	A0A0C4DH72::P01597::A0A075B6S5::P01601::P01599_QMTQSPSSLSASVGDR_HexNAc(1)	File25315 Spectrum14832 scans: 20071
P01011	VLVNYIFFKAKWEMPFDPQDTHQSR	M14(Oxidation)	2604.000	4059.83	4	1015.97	3111.53	-0.0210367	-5.18167	0.00010288	88	0.1079	0.004765	947.3230	Hex(1)HexNAc(1)Neu5Ac(2)	P01011_VLVNYIFFKAKWEMPFDPQDTHQSR_Hex(1)HexNAc(1)Neu5Ac(2)	File25315 Spectrum7132 scans: 11935
P02671	ESSSHHPGIAEFPSR		2948.000	2292.99	2	1147.5	1636.76	0.00106449	0.464239	0.0001521	88	0.04264	0.002709	656.2276	Hex(1)HexNAc(1)Neu5Ac(1)	P02671_ESSSHHPGIAEFPSR_Hex(1)HexNAc(1)Neu5Ac(1)	File25315 Spectrum9400 scans: 14344
Q13595	AHTPTPGIYMGRPTHSGGGGGGGGGGGGGGGGRRR	M10(Oxidation)	4496.000	3629.64	3	1210.89	3118.47	-0.0263702	-7.26525	8.32e-05	88	0.2557	0.009077	511.1901	Fuc(1)Hex(1)HexNAc(1)	Q13595_AHTPTPGIYMGRPTHSGGGGGGGGGGGGGGGGRRR_Fuc(1)Hex(1)HexNAc(1)	File25315 Spectrum18864 scans: 24305
P02768	VENDEMPADLPSLAADFVESK	M6(Oxidation)	4934.000	2948.31	3	983.776	2292.05	0.0321119	10.8917	7.8216e-05	88	0.02524	0.002709	656.2276	Hex(1)HexNAc(1)Neu5Ac(1)	P02768_VENDEMPADLPSLAADFVESK_Hex(1)HexNAc(1)Neu5Ac(1)	File25315 Spectrum21417 scans: 26995
P02671	SDCPEAMDLGTLSGIGTLDGFR	C3(Carbamidomethyl);M7(Oxidation)	4780.000	3186.4	3	1063.14	2327.04	0.0472088	14.8157	0.00083947	88	0.07003	0.002709	859.3070	Hex(1)HexNAc(2)Neu5Ac(1)	P02671_SDCPEAMDLGTLSGIGTLDGFR_Hex(1)HexNAc(2)Neu5Ac(1)	File25315 Spectrum20531 scans: 26058
P02671	GGSTSYGTGSETESPRNPSSAGSWNSGSSGPGSTGNR	N17(Deamidated)	2716.000	3883.65	3	1295.56	3517.49	0.0275839	7.10256	0.00011234	87	0.1693	0.006263	365.1322	Hex(1)HexNAc(1)	P02671_GGSTSYGTGSETESPRNPSSAGSWNSGSSGPGSTGNR_Hex(1)HexNAc(1)	File25315 Spectrum7865 scans: 12717
P02749	AVFECLPQHAMFGNDTITCTTHGNWTKLPECR	C5(Carbamidomethyl);M11(Oxidation);N14(Deamidated);C19(Carbamidomethyl);N24(Deamidated);C31(Carbamidomethyl)	4641.000	4011.76	5	803.359	3808.67	0.00599638	1.4947	1.4821e-06	87	0.02902	0.002709	203.0794	HexNAc(1)	P02749_AVFECLPQHAMFGNDTITCTTHGNWTKLPECR_HexNAc(1)	File25315 Spectrum19672 scans: 25153
P01857::P01861	PSDIAVEWESNGQPENNYK	N11(Deamidated);N16(Deamidated);N17(Deamidated)	4748.000	2545.1	3	849.374	2178.92	0.0406636	15.9772	6.5088e-05	87	0.03296	0.002709	365.1322	Hex(1)HexNAc(1)	P01857::P01861_PSDIAVEWESNGQPENNYK_Hex(1)HexNAc(1)	File25315 Spectrum20350 scans: 25865
P01834	NALQSGNSQESVTEQDSK	N1(Deamidated)	4071.000	2781.18	3	928.068	1921.85	0.0241629	8.68798	0.0022904	87	0.1423	0.005712	859.3070	Hex(1)HexNAc(2)Neu5Ac(1)	P01834_NALQSGNSQESVTEQDSK_Hex(1)HexNAc(2)Neu5Ac(1)	File25315 Spectrum16400 scans: 21718
P24593	KFVGGAENTAHPR		2085.000	2330.03	3	777.684	1382.71	0.00257414	1.10477	0.0071211	87	0.1125	0.004765	947.3230	Hex(1)HexNAc(1)Neu5Ac(2)	P24593_KFVGGAENTAHPR_Hex(1)HexNAc(1)Neu5Ac(2)	File25315 Spectrum3777 scans: 8402
Q14624	NLLSDPEQGVEVTGQYER		4846.000	2398.14	3	800.388	2032.97	0.0389073	16.2239	0.00031101	87	0.0669	0.002709	365.1322	Hex(1)HexNAc(1)	Q14624_NLLSDPEQGVEVTGQYER_Hex(1)HexNAc(1)	File25315 Spectrum20913 scans: 26461
P13671	PCINDDEEMKEVDLPEIEADSGCPQPVPPENGFIR	C2(Carbamidomethyl);M9(Oxidation);C23(Carbamidomethyl);N31(Deamidated)	4706.000	4873.15	4	1219.29	4012.77	0.0733615	15.0542	0.0019787	87	0.04157	0.002709	859.3070	Hex(1)HexNAc(2)Neu5Ac(1)	P13671_PCINDDEEMKEVDLPEIEADSGCPQPVPPENGFIR_Hex(1)HexNAc(2)Neu5Ac(1)	File25315 Spectrum20091 scans: 25593
Q9Y6R7	YLCEDGCQNNCPACTPGQAQHYEGDRLCGMLTK	C3(Carbamidomethyl);C7(Carbamidomethyl);Q8(Deamidated);N9(Deamidated);N10(Deamidated);C11(Carbamidomethyl);C14(Carbamidomethyl);C28(Carbamidomethyl)	4045.000	4417.79	4	1105.45	3905.55	0.0461262	10.441	8.4183e-05	87	0.00965	0.002709	511.1901	Fuc(1)Hex(1)HexNAc(1)	Q9Y6R7_YLCEDGCQNNCPACTPGQAQHYEGDRLCGMLTK_Fuc(1)Hex(1)HexNAc(1)	File25315 Spectrum16239 scans: 21549
P01009	LVPVSLAEDPQGDAAQKTDTSHHDQDHPTFNK	Q11(Deamidated);Q16(Deamidated)	1942.000	4447.95	4	1112.99	3499.61	0.0122407	2.752	0.00051736	86	0.05205	0.002709	947.3230	Hex(1)HexNAc(1)Neu5Ac(2)	P01009_LVPVSLAEDPQGDAAQKTDTSHHDQDHPTFNK_Hex(1)HexNAc(1)Neu5Ac(2)	File25315 Spectrum2888 scans: 7467
P02790	PTSAHGNVAEGETKPDPDVTER	N7(Deamidated)	2742.000	4130.63	3	1377.88	2307.06	-0.0775269	-18.7688	0.0044089	86	0.1863	0.006263	1823.6453	Fuc(1)Hex(3)HexNAc(3)Neu5Ac(2)	P02790_PTSAHGNVAEGETKPDPDVTER_Fuc(1)Hex(3)HexNAc(3)Neu5Ac(2)	File25315 Spectrum8054 scans: 12916
P02768	TEFAKTCVADESAENCDK	C7(Carbamidomethyl);C16(Carbamidomethyl)	2540.000	2480.03	2	1241.02	2073.86	0.00761229	3.06944	2.5738e-06	86	0.03089	0.002709	406.1587	HexNAc(2)	P02768_TEFAKTCVADESAENCDK_HexNAc(2)	File25315 Spectrum6724 scans: 11503
A0M8Q6	CRVTHEGSTVEK	C1(Carbamidomethyl)	2280.000	1767.77	3	590.265	1401.67	-0.0286601	-16.2126	5.9294e-05	86	0.1181	0.004765	365.1322	Hex(1)HexNAc(1)	A0M8Q6_CRVTHEGSTVEK_Hex(1)HexNAc(1)	File25315 Spectrum5019 scans: 9706
P17936	SAGSVESPSVSSTHR		2265.000	2142.93	3	715.318	1486.7	0.0039716	1.85335	0.0038835	85	0.1354	0.005712	656.2276	Hex(1)HexNAc(1)Neu5Ac(1)	P17936_SAGSVESPSVSSTHR_Hex(1)HexNAc(1)Neu5Ac(1)	File25315 Spectrum4918 scans: 9600
P02671	ARPNNPDWGTFEEVSGNVSPGTR		3907.000	3433.53	4	859.389	2486.16	0.0460305	13.4062	0.00051503	85	0.08672	0.003868	947.3230	Hex(1)HexNAc(1)Neu5Ac(2)	P02671_ARPNNPDWGTFEEVSGNVSPGTR_Hex(1)HexNAc(1)Neu5Ac(2)	File25315 Spectrum15468 scans: 20739
P02675	REEAPSLRPAPPPISGGGYR		3490.000	2762.33	4	691.589	2106.1	0.00225862	0.817652	2.9483e-07	85	0.01438	0.002709	656.2276	Hex(1)HexNAc(1)Neu5Ac(1)	P02675_REEAPSLRPAPPPISGGGYR_Hex(1)HexNAc(1)Neu5Ac(1)	File25315 Spectrum12994 scans: 18141
Q92954	KTITTTEIMNKPEETAKPK		2543.000	2815.39	4	704.856	2159.15	0.0145239	5.15876	1.6443e-05	85	0.06245	0.002709	656.2276	Hex(1)HexNAc(1)Neu5Ac(1)	Q92954_KTITTTEIMNKPEETAKPK_Hex(1)HexNAc(1)Neu5Ac(1)	File25315 Spectrum6738 scans: 11519
P0C0L4::P0C0L5	GSVTGSQSNAVSPTPAPR		2546.000	2369.09	2	1185.55	1711.85	0.00625254	2.63922	0.00050493	85	0.07338	0.002709	656.2276	Hex(1)HexNAc(1)Neu5Ac(1)	P0C0L4::P0C0L5_GSVTGSQSNAVSPTPAPR_Hex(1)HexNAc(1)Neu5Ac(1)	File25315 Spectrum6758 scans: 11542
P13671	PCINDDEEMKEVDLPEIEADSGCPQPVPPENGFIR	C2(Carbamidomethyl);N4(Deamidated);C23(Carbamidomethyl);N31(Deamidated)	4552.000	4946.16	4	1237.55	3997.75	0.0826605	16.712	0.00049357	85	0.01853	0.002709	947.3230	Hex(1)HexNAc(1)Neu5Ac(2)	P13671_PCINDDEEMKEVDLPEIEADSGCPQPVPPENGFIR_Hex(1)HexNAc(1)Neu5Ac(2)	File25315 Spectrum19180 scans: 24637
P00747	CTTPPPSSGPTYQCLK	C1(Carbamidomethyl);C14(Carbamidomethyl)	4012.000	2449.05	2	1225.53	1792.81	0.0110413	4.50841	0.0009198	84	0.1254	0.004765	656.2276	Hex(1)HexNAc(1)Neu5Ac(1)	P00747_CTTPPPSSGPTYQCLK_Hex(1)HexNAc(1)Neu5Ac(1)	File25315 Spectrum16045 scans: 21345
P04004	VFTMPEDEYTVYDDGEEKNNATVHEQVGGPSLTSDLQAQSK	N19(Deamidated);N20(Deamidated);Q26(Deamidated)	4520.000	4937.07	4	1235.28	4531	-0.0878657	-17.7971	0.00014953	84	0.01887	0.002709	406.1587	HexNAc(2)	P04004_VFTMPEDEYTVYDDGEEKNNATVHEQVGGPSLTSDLQAQSK_HexNAc(2)	File25315 Spectrum19005 scans: 24453
P02675	DMNTENGGWTVIQNR	M2(Oxidation)	4242.000	2155.95	2	1078.98	1749.77	0.0135007	6.26206	0.0001104	84	0.0422	0.002709	406.1587	HexNAc(2)	P02675_DMNTENGGWTVIQNR_HexNAc(2)	File25315 Spectrum17441 scans: 22811
P01860	SCDTPPPCPR	C2(Carbamidomethyl);C8(Carbamidomethyl)	2249.000	1841.72	2	921.868	1185.49	0.00376947	2.04671	4.5927e-05	83	0.03441	0.002709	656.2276	Hex(1)HexNAc(1)Neu5Ac(1)	P01860_SCDTPPPCPR_Hex(1)HexNAc(1)Neu5Ac(1)	File25315 Spectrum4815 scans: 9492
P00742	CSLDNGDCDQFCHEEQNSVVCSCAR	C1(Carbamidomethyl);C8(Carbamidomethyl);C12(Carbamidomethyl);C21(Carbamidomethyl);C23(Carbamidomethyl)	3210.000	3453.36	3	1152.13	3046.14	0.0577793	16.7313	3.3688e-05	83	0.02941	0.002709	406.1587	HexNAc(2)	P00742_CSLDNGDCDQFCHEEQNSVVCSCAR_HexNAc(2)	File25315 Spectrum11143 scans: 16187
P02768	VTEFAKTCVADESAENCDK	C8(Carbamidomethyl);C17(Carbamidomethyl)	4108.000	2539.1	3	847.373	2172.93	0.0305533	12.0331	8.5911e-06	83	0.02615	0.002709	365.1322	Hex(1)HexNAc(1)	P02768_VTEFAKTCVADESAENCDK_Hex(1)HexNAc(1)	File25315 Spectrum16620 scans: 21949
P02675	EEAPSLRPAPPPISGGGYR		3797.000	2606.24	3	869.754	1950	0.0157461	6.0417	0.00020383	83	0.2349	0.007101	656.2276	Hex(1)HexNAc(1)Neu5Ac(1)	P02675_EEAPSLRPAPPPISGGGYR_Hex(1)HexNAc(1)Neu5Ac(1)	File25315 Spectrum14792 scans: 20029
P02768	ETCFAEEGKK	C3(Carbamidomethyl)	2291.000	2057.85	3	686.957	1197.53	0.00631369	3.0681	0.00014735	82	0.1523	0.006263	859.3070	Hex(1)HexNAc(2)Neu5Ac(1)	P02768_ETCFAEEGKK_Hex(1)HexNAc(2)Neu5Ac(1)	File25315 Spectrum5091 scans: 9782
P00738	FAVDSGNDVTDIADDGCPKPPEIAHGYVEHSVR	N7(Deamidated);C17(Carbamidomethyl)	3699.000	3771.69	5	755.346	3567.62	-0.00889193	-2.35754	0.0012282	82	0.01552	0.002709	203.0794	HexNAc(1)	P00738_FAVDSGNDVTDIADDGCPKPPEIAHGYVEHSVR_HexNAc(1)	File25315 Spectrum14173 scans: 19379
P29622	GESCSNSSHQQILETGEGSPSLK	C4(Carbamidomethyl)	3508.000	3290.46	4	823.622	2431.09	0.0593484	18.0365	1.8035e-05	81	0.02748	0.002709	859.3070	Hex(1)HexNAc(2)Neu5Ac(1)	P29622_GESCSNSSHQQILETGEGSPSLK_Hex(1)HexNAc(2)Neu5Ac(1)	File25315 Spectrum13113 scans: 18266
P01023	ASDCHGEDSQAFCEK	C4(Carbamidomethyl);C13(Carbamidomethyl)	2340.000	2233.86	2	1117.94	1739.65	0.029899	13.3845	0.00050204	81	0.1024	0.004765	494.1748	HexNAc(1)Neu5Ac(1)	P01023_ASDCHGEDSQAFCEK_HexNAc(1)Neu5Ac(1)	File25315 Spectrum5409 scans: 10116
P02768	SHCIAEVENDEMPADLPSLAADFVESK	C3(Carbamidomethyl);N9(Deamidated);M12(Oxidation)	4644.000	3355.44	3	1119.49	2990.32	-0.00706309	-2.10497	0.001526	81	0.1045	0.004765	365.1322	Hex(1)HexNAc(1)	P02768_SHCIAEVENDEMPADLPSLAADFVESK_Hex(1)HexNAc(1)	File25315 Spectrum19692 scans: 25174
P36955	HSSCQNPASPPEEGSPDPDSTGALVEEEDPFFKVPVNK	C4(Carbamidomethyl);N6(Deamidated)	4867.000	4589.08	4	1148.28	4094.83	0.0769442	16.7668	0.00034846	81	0.01196	0.002709	494.1748	HexNAc(1)Neu5Ac(1)	P36955_HSSCQNPASPPEEGSPDPDSTGALVEEEDPFFKVPVNK_HexNAc(1)Neu5Ac(1)	File25315 Spectrum21036 scans: 26590
P02760	CMGNGNNFVTEKECLQTCR	C1(Carbamidomethyl);M2(Oxidation);C14(Carbamidomethyl);C18(Carbamidomethyl)	3369.000	2739.12	3	914.046	2332.97	-0.00883453	-3.22532	2.7428e-05	81	0.06493	0.002709	406.1587	HexNAc(2)	P02760_CMGNGNNFVTEKECLQTCR_HexNAc(2)	File25315 Spectrum12191 scans: 17298
A0A0C4DH72	LWLPGARCAIQMTQSPSSLSASVGDR	C8(Carbamidomethyl);M12(Oxidation);Q14(Deamidated)	2987.000	3663.65	4	916.92	2804.36	-0.0146538	-3.99979	0.00017951	81	0.04196	0.002709	859.3070	Hex(1)HexNAc(2)Neu5Ac(1)	A0A0C4DH72_LWLPGARCAIQMTQSPSSLSASVGDR_Hex(1)HexNAc(2)Neu5Ac(1)	File25315 Spectrum9655 scans: 14611
P00738	EADDGCPKPPEIAHGYVEHSVR	C6(Carbamidomethyl)	3657.000	3410.43	4	853.616	2462.13	-0.0202462	-5.93653	0.002388	80	0.1493	0.005712	947.3230	Hex(1)HexNAc(1)Neu5Ac(2)	P00738_EADDGCPKPPEIAHGYVEHSVR_Hex(1)HexNAc(1)Neu5Ac(2)	File25315 Spectrum13942 scans: 19137
P01857::P01861	NQVSLTCLVKGFYPSDIAVEWESNGQPENNYK	C7(Carbamidomethyl);N24(Deamidated);Q26(Deamidated)	4736.000	4181.87	3	1394.97	3687.7	-0.00373736	-0.893704	0.0003539	80	0.1706	0.006263	494.1748	HexNAc(1)Neu5Ac(1)	P01857::P01861_NQVSLTCLVKGFYPSDIAVEWESNGQPENNYK_HexNAc(1)Neu5Ac(1)	File25315 Spectrum20282 scans: 25794
P43487	STENTDESNHDPQFEPIVSLPEQEIK	N4(Deamidated);N9(Deamidated)	4431.000	3932.72	4	984.187	2984.34	0.0511394	13.0036	0.0024348	80	0.05224	0.002709	947.3230	Hex(1)HexNAc(1)Neu5Ac(2)	P43487_STENTDESNHDPQFEPIVSLPEQEIK_Hex(1)HexNAc(1)Neu5Ac(2)	File25315 Spectrum18505 scans: 23928
P02768	EKPLLEKSHCIAEVENDEMPADLPSLAADFVESK	C10(Carbamidomethyl)	4830.000	4671.07	3	1558.03	3810.83	-0.0752056	-16.1003	0.00029869	80	0.1063	0.004765	859.3070	Hex(1)HexNAc(2)Neu5Ac(1)	P02768_EKPLLEKSHCIAEVENDEMPADLPSLAADFVESK_Hex(1)HexNAc(2)Neu5Ac(1)	File25315 Spectrum20820 scans: 26363
P02768	VHTECCHGDLLECADDRADLAKYICENQDSISSK	C5(Carbamidomethyl);C6(Carbamidomethyl);C13(Carbamidomethyl);C25(Carbamidomethyl)	4329.000	4211.79	5	843.365	4008.73	-0.0279317	-6.63179	7.6407e-06	79	0.02042	0.002709	203.0794	HexNAc(1)	P02768_VHTECCHGDLLECADDRADLAKYICENQDSISSK_HexNAc(1)	File25315 Spectrum17940 scans: 23335
P02671	GSAGHWTSESSVSGSTGQWHSESGSFRPDSPGSGN	Q18(Deamidated)	3420.000	4163.72	4	1041.94	3506.46	0.0228651	5.49151	0.00055225	79	0.1959	0.006263	656.2276	Hex(1)HexNAc(1)Neu5Ac(1)	P02671_GSAGHWTSESSVSGSTGQWHSESGSFRPDSPGSGN_Hex(1)HexNAc(1)Neu5Ac(1)	File25315 Spectrum12532 scans: 17656
P02671	YGTGSETESPRNPSSAGSWNSGSSGPGSTGNR	N20(Deamidated)	2911.000	3534.53	4	884.639	3128.33	0.0362388	10.2528	0.0001152	79	0.01026	0.002709	406.1587	HexNAc(2)	P02671_YGTGSETESPRNPSSAGSWNSGSSGPGSTGNR_HexNAc(2)	File25315 Spectrum9158 scans: 14088
P02760	GCMGNGNNFVTEKECLQTCR	C2(Carbamidomethyl);C15(Carbamidomethyl);C19(Carbamidomethyl)	3034.000	2780.14	3	927.72	2373.99	-0.0121836	-4.38238	7.6926e-05	79	0.06853	0.002709	406.1587	HexNAc(2)	P02760_GCMGNGNNFVTEKECLQTCR_HexNAc(2)	File25315 Spectrum9968 scans: 14940
P02768	CEKPLLEKSHCIAEVENDEMPADLPSLAADFVESK	C1(Carbamidomethyl);C11(Carbamidomethyl)	4579.000	4482.04	4	1121.52	3970.86	-0.0158617	-3.53895	0.00018169	79	0.02768	0.002709	511.1901	Fuc(1)Hex(1)HexNAc(1)	P02768_CEKPLLEKSHCIAEVENDEMPADLPSLAADFVESK_Fuc(1)Hex(1)HexNAc(1)	File25315 Spectrum19330 scans: 24794
P02768	EDHVKLVNEVTEFAKTCVADESAENCDK	N8(Deamidated);C17(Carbamidomethyl);C26(Carbamidomethyl)	3428.000	3748.64	3	1250.55	3237.44	0.00828282	2.20955	0.0060409	79	0.1888	0.006263	511.1901	Fuc(1)Hex(1)HexNAc(1)	P02768_EDHVKLVNEVTEFAKTCVADESAENCDK_Fuc(1)Hex(1)HexNAc(1)	File25315 Spectrum12592 scans: 17719
P01871	TNISESHPNATFSAVGEASICEDDWNSGER	N9(Deamidated);C21(Carbamidomethyl)	4214.000	3686.56	4	922.648	3280.39	0.0203011	5.50679	0.00024178	79	0.02191	0.002709	406.1587	HexNAc(2)	P01871_TNISESHPNATFSAVGEASICEDDWNSGER_HexNAc(2)	File25315 Spectrum17275 scans: 22636
P00734	GDFGYCDLNYCEEAVEEETGDGLDEDSDR	C6(Carbamidomethyl);N9(Deamidated);C11(Carbamidomethyl)	4561.000	3871.44	4	968.869	3359.25	0.000504628	0.130346	0.010028	79	0.1205	0.004765	511.1901	Fuc(1)Hex(1)HexNAc(1)	P00734_GDFGYCDLNYCEEAVEEETGDGLDEDSDR_Fuc(1)Hex(1)HexNAc(1)	File25315 Spectrum19233 scans: 24692
P00738	SGNDVTDIADDGCPKPPEIAHGYVEHSVR	C13(Carbamidomethyl)	3812.000	3500.54	5	701.115	3134.44	-0.0352916	-10.0818	0.00084255	78	0.06049	0.002709	365.1322	Hex(1)HexNAc(1)	P00738_SGNDVTDIADDGCPKPPEIAHGYVEHSVR_Hex(1)HexNAc(1)	File25315 Spectrum14887 scans: 20129
P01042	DCLGCVHPISTQSPDLEPILR	C2(Carbamidomethyl);C5(Carbamidomethyl)	4643.000	3062.39	3	1021.81	2406.17	-0.00129473	-0.422784	2.5145e-05	78	0.05705	0.002709	656.2276	Hex(1)HexNAc(1)Neu5Ac(1)	P01042_DCLGCVHPISTQSPDLEPILR_Hex(1)HexNAc(1)Neu5Ac(1)	File25315 Spectrum19683 scans: 25165
P02671	SWNSGSSGPGSTGNR	N3(Deamidated)	2504.000	1962.84	3	655.287	1450.61	0.0380033	19.3614	0.00046306	78	0.04827	0.002709	511.1901	Fuc(1)Hex(1)HexNAc(1)	P02671_SWNSGSSGPGSTGNR_Fuc(1)Hex(1)HexNAc(1)	File25315 Spectrum6484 scans: 11250
P01834	EAKVQWKVDNALQSGNSQESVTEQDSK	Q13(Deamidated)	4467.000	3208.47	3	1070.5	3005.42	-0.0337315	-10.5133	5.5135e-06	78	0.05691	0.002709	203.0794	HexNAc(1)	P01834_EAKVQWKVDNALQSGNSQESVTEQDSK_HexNAc(1)	File25315 Spectrum18704 scans: 24137
P02768	KTCVADESAENCDK	C3(Carbamidomethyl);C12(Carbamidomethyl)	3449.000	2032.84	2	1017.43	1625.67	0.014543	7.15401	3.9385e-05	78	0.09771	0.004765	406.1587	HexNAc(2)	P02768_KTCVADESAENCDK_HexNAc(2)	File25315 Spectrum12734 scans: 17868
P02768	AEVENDEMPADLPSLAADFVESK	N5(Deamidated);M8(Oxidation)	4854.000	3150.28	4	788.577	2493.11	-0.0616557	-19.5715	0.0047311	78	0.08973	0.003868	656.2276	Hex(1)HexNAc(1)Neu5Ac(1)	P02768_AEVENDEMPADLPSLAADFVESK_Hex(1)HexNAc(1)Neu5Ac(1)	File25315 Spectrum20958 scans: 26508
P02671	HKEVTKEVVTSEDGSDCPEAMDLGTLSGIGTLDGFR	C17(Carbamidomethyl)	4806.000	4215.01	4	1054.76	3849.8	0.0705957	16.7487	0.00081593	78	0.02838	0.002709	365.1322	Hex(1)HexNAc(1)	P02671_HKEVTKEVVTSEDGSDCPEAMDLGTLSGIGTLDGFR_Hex(1)HexNAc(1)	File25315 Spectrum20673 scans: 26209
P09871	CKGDSGGAFAVQDPNDKTK	C1(Carbamidomethyl);N15(Deamidated)	2522.000	2401.03	3	801.35	1994.9	-0.0314986	-13.1188	0.00074803	78	0.1736	0.006263	406.1587	HexNAc(2)	P09871_CKGDSGGAFAVQDPNDKTK_HexNAc(2)	File25315 Spectrum6606 scans: 11378
P00748	GTCVNMPSGPHCLCPQHLTGNHCQK	C3(Carbamidomethyl);C12(Carbamidomethyl);C14(Carbamidomethyl);C23(Carbamidomethyl)	3034.000	3092.32	5	619.472	2889.23	0.00875674	2.83177	1.0349e-05	78	0.006008	0.002709	203.0794	HexNAc(1)	P00748_GTCVNMPSGPHCLCPQHLTGNHCQK_HexNAc(1)	File25315 Spectrum9971 scans: 14943
P02768	VENDEMPADLPSLAADFVESK	M6(Oxidation)	4839.000	3151.3	3	1051.44	2292.05	-0.0552881	-17.5445	5.8777e-05	77	0.06456	0.002709	859.3070	Hex(1)HexNAc(2)Neu5Ac(1)	P02768_VENDEMPADLPSLAADFVESK_Hex(1)HexNAc(2)Neu5Ac(1)	File25315 Spectrum20874 scans: 26420
P05155	SSNPNATSSSSQDPESLQDRGEGK	N3(Deamidated);N5(Deamidated)	2441.000	2991.23	3	998.084	2479.06	-0.0222608	-7.44201	7.8826e-05	77	0.07708	0.003868	511.1901	Fuc(1)Hex(1)HexNAc(1)	P05155_SSNPNATSSSSQDPESLQDRGEGK_Fuc(1)Hex(1)HexNAc(1)	File25315 Spectrum6078 scans: 10818
P02671	PGSTGSWNSGSSGTGSTGNQNPGSPRPGSTGTWNPGSSER	N8(Deamidated);N19(Deamidated);Q20(Deamidated)	3139.000	4361.91	4	1091.48	3849.63	0.0796522	18.2609	0.0012891	77	0.01127	0.002709	511.1901	Fuc(1)Hex(1)HexNAc(1)	P02671_PGSTGSWNSGSSGTGSTGNQNPGSPRPGSTGTWNPGSSER_Fuc(1)Hex(1)HexNAc(1)	File25315 Spectrum10672 scans: 15693
P02679	EAQCQEPCKDTVQIHDITGKDCQDIANK	C4(Carbamidomethyl);C8(Carbamidomethyl);C22(Carbamidomethyl)	3381.000	3811.68	3	1271.57	3300.48	0.0102462	2.6881	0.00034373	77	0.1098	0.004765	511.1901	Fuc(1)Hex(1)HexNAc(1)	P02679_EAQCQEPCKDTVQIHDITGKDCQDIANK_Fuc(1)Hex(1)HexNAc(1)	File25315 Spectrum12270 scans: 17381
P00738	IADDGCPKPPEIAHGYVEHSVR	C6(Carbamidomethyl)	3698.000	3306.49	5	662.306	2446.17	0.0133065	4.02436	0.0036554	76	0.1225	0.004765	859.3070	Hex(1)HexNAc(2)Neu5Ac(1)	P00738_IADDGCPKPPEIAHGYVEHSVR_Hex(1)HexNAc(2)Neu5Ac(1)	File25315 Spectrum14167 scans: 19373
P08603	NSGYKIEGDEEMHCSDDGFWSK	C14(Carbamidomethyl)	3951.000	2996.21	4	750.059	2590.04	0.0125268	4.18088	0.0014676	76	0.0642	0.002709	406.1587	HexNAc(2)	P08603_NSGYKIEGDEEMHCSDDGFWSK_HexNAc(2)	File25315 Spectrum15714 scans: 20997
P02768	GDLLECADDRADLAKYICENQDSISSK	C6(Carbamidomethyl);C18(Carbamidomethyl);Q21(Deamidated)	2673.000	3581.6	3	1194.87	3086.38	0.0413427	11.5431	0.045925	76	0.1658	0.006263	494.1748	HexNAc(1)Neu5Ac(1)	P02768_GDLLECADDRADLAKYICENQDSISSK_HexNAc(1)Neu5Ac(1)	File25315 Spectrum7578 scans: 12416
P02790	GHGNSTHHGPEYMR		1848.000	3402.3	4	851.583	1578.67	-0.0174129	-5.11799	0.0061351	75	0.1871	0.006263	1823.6453	Fuc(1)Hex(3)HexNAc(3)Neu5Ac(2)	P02790_GHGNSTHHGPEYMR_Fuc(1)Hex(3)HexNAc(3)Neu5Ac(2)	File25315 Spectrum2304 scans: 6843
P02671	GGSTSYGTGSETESPRNPSSAGSWNSGSSGPGSTGNR	N17(Deamidated);N25(Deamidated)	2509.000	3925.69	3	1309.57	3518.47	0.0566683	14.4352	0.010118	75	0.122	0.004765	406.1587	HexNAc(2)	P02671_GGSTSYGTGSETESPRNPSSAGSWNSGSSGPGSTGNR_HexNAc(2)	File25315 Spectrum6518 scans: 11285
P01042	DFVQPPTKICVGCPR	C10(Carbamidomethyl);C13(Carbamidomethyl)	4083.000	2429.11	3	810.709	1772.87	0.00827524	3.4067	0.00024515	75	0.1096	0.004765	656.2276	Hex(1)HexNAc(1)Neu5Ac(1)	P01042_DFVQPPTKICVGCPR_Hex(1)HexNAc(1)Neu5Ac(1)	File25315 Spectrum16471 scans: 21792
Q14247	VSIAQDDAGADDWETDPDFVNDVSEK		4482.000	3331.44	3	1111.49	2837.22	0.0528133	15.853	3.5327e-05	75	0.04011	0.002709	494.1748	HexNAc(1)Neu5Ac(1)	Q14247_VSIAQDDAGADDWETDPDFVNDVSEK_HexNAc(1)Neu5Ac(1)	File25315 Spectrum18783 scans: 24220
P01597	LWLRGARCDIQMTQSPSSLSASVGDR	C8(Carbamidomethyl);Q11(Deamidated);M12(Oxidation)	3422.000	3314.54	3	1105.85	2907.4	-0.0229225	-6.91574	0.0011935	75	0.1165	0.004765	406.1587	HexNAc(2)	P01597_LWLRGARCDIQMTQSPSSLSASVGDR_HexNAc(2)	File25315 Spectrum12552 scans: 17677
P02768	ADDRADLAKYICENQDSISSK	C12(Carbamidomethyl)	2585.000	2909.25	3	970.757	2398.11	-0.0479969	-16.498	0.00018486	75	0.08292	0.003868	511.1901	Fuc(1)Hex(1)HexNAc(1)	P02768_ADDRADLAKYICENQDSISSK_Fuc(1)Hex(1)HexNAc(1)	File25315 Spectrum7013 scans: 11811
P02787	GTCPEAPTDECKPVK	C3(Carbamidomethyl);C11(Carbamidomethyl)	2305.000	2094.95	3	699.323	1687.75	0.0316455	15.1056	0.0011759	74	0.1874	0.006263	406.1587	HexNAc(2)	P02787_GTCPEAPTDECKPVK_HexNAc(2)	File25315 Spectrum5185 scans: 9880
B9A064	CQVTHEGSTVEK	C1(Carbamidomethyl)	2487.000	1738.75	3	580.591	1373.62	-0.00405797	-2.33384	0.00036231	74	0.09115	0.003868	365.1322	Hex(1)HexNAc(1)	B9A064_CQVTHEGSTVEK_Hex(1)HexNAc(1)	File25315 Spectrum6380 scans: 11137
Q9UGM5	NTPPTDSPSK		1772.000	1698.72	3	567.247	1042.49	-0.00213305	-1.25568	3.2194e-05	74	0.06384	0.002709	656.2276	Hex(1)HexNAc(1)Neu5Ac(1)	Q9UGM5_NTPPTDSPSK_Hex(1)HexNAc(1)Neu5Ac(1)	File25315 Spectrum1852 scans: 6368
A0A0B4J1Y9	VVILQGVQCEVQLVESGGGLVQPGGSLR	Q5(Deamidated);Q8(Deamidated);C9(Carbamidomethyl)	4455.000	4704.08	5	941.823	2879.51	-0.0733091	-15.5841	0.0077436	73	0.1125	0.004765	1823.6453	Fuc(1)Hex(3)HexNAc(3)Neu5Ac(2)	A0A0B4J1Y9_VVILQGVQCEVQLVESGGGLVQPGGSLR_Fuc(1)Hex(3)HexNAc(3)Neu5Ac(2)	File25315 Spectrum18637 scans: 24067
P02768	NEVTEFAKTCVADESAENCDK	N1(Deamidated);C10(Carbamidomethyl);C19(Carbamidomethyl)	2025.000	2783.08	3	928.701	2417	-0.0537829	-19.325	0.0014286	73	0.09768	0.004765	365.1322	Hex(1)HexNAc(1)	P02768_NEVTEFAKTCVADESAENCDK_Hex(1)HexNAc(1)	File25315 Spectrum3413 scans: 8020
P08519	NLTRCSDTEGTVVAPPTVIQVPSLGPPSEQDCMFGNGK	N36(Deamidated);C5(Carbamidomethyl);Q30(Deamidated);C32(Carbamidomethyl)	5158.000	4262.92	3	1421.98	4059.89	-0.0473116	-11.0984	0.032322	73	0.2001	0.006263	203.0794	HexNAc(1)	P08519_NLTRCSDTEGTVVAPPTVIQVPSLGPPSEQDCMFGNGK_HexNAc(1)	File25315 Spectrum22642 scans: 28315
P01859::P01861	CNVDHKPSNTK	C1(Carbamidomethyl)	1620.000	1663.76	2	832.889	1298.6	0.0275135	16.5369	3.4572e-05	72	0.01353	0.002709	365.1322	Hex(1)HexNAc(1)	P01859::P01861_CNVDHKPSNTK_Hex(1)HexNAc(1)	File25315 Spectrum917 scans: 5385
P01860::P01857	CNVNHKPSNTK	C1(Carbamidomethyl);N4(Deamidated)	1620.000	1663.76	2	832.889	1298.6	0.0275135	16.5369	3.4572e-05	72	0.01353	0.002709	365.1322	Hex(1)HexNAc(1)	P01860::P01857_CNVNHKPSNTK_Hex(1)HexNAc(1)	File25315 Spectrum917 scans: 5385
P01042	KESNEELTESCETK	N4(Deamidated);C11(Carbamidomethyl)	2295.000	2340.9	3	781.308	1683.71	-0.0434235	-18.5499	0.062435	71	0.1949	0.006263	656.2276	Hex(1)HexNAc(1)Neu5Ac(1)	P01042_KESNEELTESCETK_Hex(1)HexNAc(1)Neu5Ac(1)	File25315 Spectrum5116 scans: 9808
P05155	SSNPNATSSSSQDPESLQDRGEGK	N3(Deamidated);N5(Deamidated)	2216.000	2845.22	3	949.412	2479.06	0.0220392	7.74607	4.9238e-05	71	0.061	0.002709	365.1322	Hex(1)HexNAc(1)	P05155_SSNPNATSSSSQDPESLQDRGEGK_Hex(1)HexNAc(1)	File25315 Spectrum4603 scans: 9269
P02675	KREEAPSLRPAPPPISGGGYR		3190.000	2890.42	4	723.612	2234.19	0.000895597	0.30985	0.00026209	71	0.1364	0.005712	656.2276	Hex(1)HexNAc(1)Neu5Ac(1)	P02675_KREEAPSLRPAPPPISGGGYR_Hex(1)HexNAc(1)Neu5Ac(1)	File25315 Spectrum11012 scans: 16050
P02671	PGSGNARPNNPDWGTFEEVSGNVSPGTR		4262.000	3101.4	3	1034.81	2898.33	-0.0119402	-3.84994	0.00014239	71	0.04059	0.002709	203.0794	HexNAc(1)	P02671_PGSGNARPNNPDWGTFEEVSGNVSPGTR_HexNAc(1)	File25315 Spectrum17560 scans: 22936
P02671	ESSSHHPGIAEFPSR		3246.000	2584.12	2	1293.06	1636.76	0.0328645	12.7179	0.1406	71	0.2184	0.006263	947.3230	Hex(1)HexNAc(1)Neu5Ac(2)	P02671_ESSSHHPGIAEFPSR_Hex(1)HexNAc(1)Neu5Ac(2)	File25315 Spectrum11372 scans: 16438
P01871	TNISESHPNATFSAVGEASICEDDWNSGER	N9(Deamidated);C21(Carbamidomethyl)	4122.000	3936.6	4	985.157	3280.39	-0.0149989	-3.81011	0.00085278	70	0.08389	0.003868	656.2276	Hex(1)HexNAc(1)Neu5Ac(1)	P01871_TNISESHPNATFSAVGEASICEDDWNSGER_Hex(1)HexNAc(1)Neu5Ac(1)	File25315 Spectrum16708 scans: 22041
P02671	GSWNSGSSGTGSTGNQNPGSPRPGSTGTWNPGSSER		3139.000	4363.91	3	1455.65	3504.53	0.0804786	18.4418	0.0069824	70	0.09794	0.004765	859.3070	Hex(1)HexNAc(2)Neu5Ac(1)	P02671_GSWNSGSSGTGSTGNQNPGSPRPGSTGTWNPGSSER_Hex(1)HexNAc(2)Neu5Ac(1)	File25315 Spectrum10668 scans: 15688
P01860	TCPRCPEPKSCDTPPPCPR	C2(Carbamidomethyl);C5(Carbamidomethyl);C11(Carbamidomethyl);C17(Carbamidomethyl)	2613.000	3170.28	4	793.577	2311	-0.0247172	-7.79653	0.03396	69	0.2168	0.006263	859.3070	Hex(1)HexNAc(2)Neu5Ac(1)	P01860_TCPRCPEPKSCDTPPPCPR_Hex(1)HexNAc(2)Neu5Ac(1)	File25315 Spectrum7187 scans: 11993
P00738	DVTDIADDGCPKPPEIAHGYVEHSVR	C10(Carbamidomethyl)	3345.000	3532.54	4	884.141	2876.34	-0.0322269	-9.12288	0.032756	69	0.2115	0.006263	656.2276	Hex(1)HexNAc(1)Neu5Ac(1)	P00738_DVTDIADDGCPKPPEIAHGYVEHSVR_Hex(1)HexNAc(1)Neu5Ac(1)	File25315 Spectrum12029 scans: 17128
P00742	GDQCETSPCQNQGK	C4(Carbamidomethyl);C9(Carbamidomethyl)	1670.000	2013.81	2	1007.91	1607.63	0.0255284	12.6767	0.018252	68	0.2105	0.006263	406.1587	HexNAc(2)	P00742_GDQCETSPCQNQGK_HexNAc(2)	File25315 Spectrum1237 scans: 5721
P02671	GSSGTGSTGNQNPGSPRPGSTGTWNPGSSER		2730.000	3176.41	2	1589.21	2973.32	0.00631607	1.98843	0.00030773	68	0.065	0.002709	203.0794	HexNAc(1)	P02671_GSSGTGSTGNQNPGSPRPGSTGTWNPGSSER_HexNAc(1)	File25315 Spectrum7958 scans: 12815
Q14624	SMVVTKPDDQEQSQVAEKPMEGESR	M2(Oxidation);Q10(Deamidated);Q12(Deamidated)	2320.000	3025.29	3	1009.44	2822.26	-0.0446482	-14.7583	1.7559e-05	68	0.03797	0.002709	203.0794	HexNAc(1)	Q14624_SMVVTKPDDQEQSQVAEKPMEGESR_HexNAc(1)	File25315 Spectrum5282 scans: 9982
Q14520	DHMIDDSMICAGNLQKPGQDTCQGDSGGPLTCEK	C10(Carbamidomethyl);C22(Carbamidomethyl);Q23(Deamidated);C32(Carbamidomethyl)	4563.000	4141.78	3	1381.6	3735.56	0.0654401	15.8	0.00066271	67	0.06689	0.002709	406.1587	HexNAc(2)	Q14520_DHMIDDSMICAGNLQKPGQDTCQGDSGGPLTCEK_HexNAc(2)	File25315 Spectrum19241 scans: 24701
P01871	HTNISESHPNATFSAVGEASICEDDWNSGER	N3(Deamidated);N10(Deamidated);C22(Carbamidomethyl)	4464.000	3913.66	4	979.422	3418.43	0.051205	13.0837	0.00032	67	0.02419	0.002709	494.1748	HexNAc(1)Neu5Ac(1)	P01871_HTNISESHPNATFSAVGEASICEDDWNSGER_HexNAc(1)Neu5Ac(1)	File25315 Spectrum18686 scans: 24118
P04196	TKPPFKPHGSR		1645.000	2198.02	4	550.512	1250.69	0.00830433	3.7781	0.20217	67	0.2402	0.007101	947.3230	Hex(1)HexNAc(1)Neu5Ac(2)	P04196_TKPPFKPHGSR_Hex(1)HexNAc(1)Neu5Ac(2)	File25315 Spectrum1070 scans: 5545
P02768	CIAEVENDEMPADLPSLAADFVESK	C1(Carbamidomethyl)	4689.000	3115.44	4	779.867	2749.25	0.0571623	18.3481	0.021206	67	0.1015	0.004765	365.1322	Hex(1)HexNAc(1)	P02768_CIAEVENDEMPADLPSLAADFVESK_Hex(1)HexNAc(1)	File25315 Spectrum19989 scans: 25486
P13671	MENNGQPCINDDEEMKEVDLPEIEADSGCPQPVPPENGFIR	M1(Oxidation);N37(Deamidated);C8(Carbamidomethyl);C29(Carbamidomethyl)	4684.000	4889.13	4	1223.29	4686.01	0.0348562	7.12932	0.043524	66	0.05942	0.002709	203.0794	HexNAc(1)	P13671_MENNGQPCINDDEEMKEVDLPEIEADSGCPQPVPPENGFIR_HexNAc(1)	File25315 Spectrum19952 scans: 25447
P00738	FAVDSGNDVTDIADDGCPKPPEIAHGYVEHSVR	C17(Carbamidomethyl)	3348.000	3972.87	5	795.582	3566.64	0.0771923	19.4298	0.0033299	66	0.08189	0.003868	406.1587	HexNAc(2)	P00738_FAVDSGNDVTDIADDGCPKPPEIAHGYVEHSVR_HexNAc(2)	File25315 Spectrum12044 scans: 17144
P01871	NISESHPNATFSAVGEASICEDDWNSGER	N1(Deamidated);C20(Carbamidomethyl)	4118.000	3544.45	4	887.12	3179.34	-0.0167204	-4.71734	0.0040672	65	0.1043	0.004765	365.1322	Hex(1)HexNAc(1)	P01871_NISESHPNATFSAVGEASICEDDWNSGER_Hex(1)HexNAc(1)	File25315 Spectrum16685 scans: 22017
P02768	ECCEKPLLEKSHCIAEVENDEMPADLPSLAADFVESK	C2(Carbamidomethyl);C3(Carbamidomethyl);C13(Carbamidomethyl);M22(Oxidation)	4583.000	4480.01	6	747.676	4275.93	-0.00313924	-0.700722	0.011777	65	0.042	0.002709	203.0794	HexNAc(1)	P02768_ECCEKPLLEKSHCIAEVENDEMPADLPSLAADFVESK_HexNAc(1)	File25315 Spectrum19351 scans: 24816
P08519	VLETPTVVPVPSMEAHSEAAPTEQTPVVRQCYHGNGQSYR	N35(Deamidated);Q24(Deamidated);Q30(Deamidated);C31(Carbamidomethyl)	4505.000	4830.17	4	1208.55	4424.07	-0.0551206	-11.4117	0.30101	65	0.1914	0.006263	406.1587	HexNAc(2)	P08519_VLETPTVVPVPSMEAHSEAAPTEQTPVVRQCYHGNGQSYR_HexNAc(2)	File25315 Spectrum18919 scans: 24363
P02768	CHGDLLECADDRADLAKYICENQDSISSK	C1(Carbamidomethyl);C8(Carbamidomethyl);C20(Carbamidomethyl);Q23(Deamidated)	2705.000	3587.5	3	1196.84	3383.47	-0.0542174	-15.1129	0.05039	65	0.2289	0.007101	203.0794	HexNAc(1)	P02768_CHGDLLECADDRADLAKYICENQDSISSK_HexNAc(1)	File25315 Spectrum7783 scans: 12631
P00734	TVAMTPRSEGSSVNLSPPLEQCVPDR	C22(Carbamidomethyl)	4177.000	3686.63	3	1229.88	2826.36	-0.0437253	-11.8605	0.073594	65	0.1582	0.006263	859.3070	Hex(1)HexNAc(2)Neu5Ac(1)	P00734_TVAMTPRSEGSSVNLSPPLEQCVPDR_Hex(1)HexNAc(2)Neu5Ac(1)	File25315 Spectrum17052 scans: 22402
P01024	RGDQDATMSILDISMMTGFAPDTDDLK	M8(Oxidation);M15(Oxidation);M16(Oxidation)	4576.000	3195.4	4	799.858	2991.31	0.006272	1.96282	0.0026228	65	0.07179	0.002709	203.0794	HexNAc(1)	P01024_RGDQDATMSILDISMMTGFAPDTDDLK_HexNAc(1)	File25315 Spectrum19314 scans: 24777
A0A075B6H9	GSHSKGDGIPDRFSGSSSGAER		2386.000	2393.06	4	599.273	2190	-0.0210915	-8.81362	0.0055909	65	0.17	0.006263	203.0794	HexNAc(1)	A0A075B6H9_GSHSKGDGIPDRFSGSSSGAER_HexNAc(1)	File25315 Spectrum5721 scans: 10443
P02751	NCESKPEAEETCFDK	N1(Deamidated);C2(Carbamidomethyl);C12(Carbamidomethyl)	2956.000	2046.83	3	683.283	1843.72	0.0225263	11.0055	0.0057614	64	0.1811	0.006263	203.0794	HexNAc(1)	P02751_NCESKPEAEETCFDK_HexNAc(1)	File25315 Spectrum9451 scans: 14397
P01009	DPQGDAAQKTDTSHHDQDHPTFNK	Q8(Deamidated)	1975.000	3096.38	5	620.283	2690.16	0.0611035	19.7339	0.0023125	64	0.08193	0.003868	406.1587	HexNAc(2)	P01009_DPQGDAAQKTDTSHHDQDHPTFNK_HexNAc(2)	File25315 Spectrum3104 scans: 7695
P02647	RHFWQQDEPPQSPWDR	Q5(Deamidated);Q6(Deamidated)	3346.000	2476.03	3	826.351	2109.93	-0.0334995	-13.5295	0.0033798	64	0.2305	0.007101	365.1322	Hex(1)HexNAc(1)	P02647_RHFWQQDEPPQSPWDR_Hex(1)HexNAc(1)	File25315 Spectrum12033 scans: 17132
P02768	LEKSHCIAEVENDEMPADLPSLAADFVESK	C6(Carbamidomethyl);N12(Deamidated);M15(Oxidation)	4687.000	4017.81	4	1005.46	3360.54	0.0394717	9.82418	0.083627	63	0.2102	0.006263	656.2276	Hex(1)HexNAc(1)Neu5Ac(1)	P02768_LEKSHCIAEVENDEMPADLPSLAADFVESK_Hex(1)HexNAc(1)Neu5Ac(1)	File25315 Spectrum19971 scans: 25467
P02671	SFRPDSPGSGNARPNNPDWGTFEEVSGNVSPGTR	N15(Deamidated);N16(Deamidated);N28(Deamidated)	3943.000	4085.82	5	818.172	3590.59	0.0510027	12.4829	0.018155	62	0.07997	0.003868	494.1748	HexNAc(1)Neu5Ac(1)	P02671_SFRPDSPGSGNARPNNPDWGTFEEVSGNVSPGTR_HexNAc(1)Neu5Ac(1)	File25315 Spectrum15666 scans: 20947
A0A0B4J1Z2	PFSLSASVGDR		3376.000	1993.91	3	665.645	1134.57	0.0380333	19.0747	0.1211	62	0.2323	0.007101	859.3070	Hex(1)HexNAc(2)Neu5Ac(1)	A0A0B4J1Z2_PFSLSASVGDR_Hex(1)HexNAc(2)Neu5Ac(1)	File25315 Spectrum12235 scans: 17344
P01009	PQGDAAQKTDTSHHDQDHPTFNK	Q7(Deamidated)	2337.000	3069.25	5	614.857	2575.13	-0.0580534	-18.9145	0.0028472	62	0.1482	0.005712	494.1748	HexNAc(1)Neu5Ac(1)	P01009_PQGDAAQKTDTSHHDQDHPTFNK_HexNAc(1)Neu5Ac(1)	File25315 Spectrum5393 scans: 10099
P02768	CEKPLLEKSHCIAEVENDEMPADLPSLAADFVESK	C1(Carbamidomethyl);C11(Carbamidomethyl);N17(Deamidated);M20(Oxidation)	4578.000	4482.02	5	897.412	3987.84	0.00553162	1.23418	0.017298	61	0.1106	0.004765	494.1748	HexNAc(1)Neu5Ac(1)	P02768_CEKPLLEKSHCIAEVENDEMPADLPSLAADFVESK_HexNAc(1)Neu5Ac(1)	File25315 Spectrum19323 scans: 24787
P08519	LTQCPVTESSVLATSTAVSEQAPTEQSPTVQDCYHGDGQSYR	C33(Carbamidomethyl);Q3(Deamidated);C4(Carbamidomethyl);Q26(Deamidated)	4632.000	4951.08	4	1238.78	4586.03	-0.0814169	-16.4443	1.4768	61	0.196	0.006263	365.1322	Hex(1)HexNAc(1)	P08519_LTQCPVTESSVLATSTAVSEQAPTEQSPTVQDCYHGDGQSYR_Hex(1)HexNAc(1)	File25315 Spectrum19624 scans: 25103
P02768	LLEKSHCIAEVENDEMPADLPSLAADFVESK	C7(Carbamidomethyl);N13(Deamidated)	4598.000	4316.93	5	864.394	3457.63	-0.00128552	-0.297785	0.016219	59	0.1491	0.005712	859.3070	Hex(1)HexNAc(2)Neu5Ac(1)	P02768_LLEKSHCIAEVENDEMPADLPSLAADFVESK_Hex(1)HexNAc(2)Neu5Ac(1)	File25315 Spectrum19433 scans: 24902
P02751	QQMVQPQSPVAVSQSKPGCYDNGKHYQINQQWER	C19(Carbamidomethyl)	3709.000	4217.94	4	1055.49	4014.89	-0.0238576	-5.65623	0.046019	59	0.193	0.006263	203.0794	HexNAc(1)	P02751_QQMVQPQSPVAVSQSKPGCYDNGKHYQINQQWER_HexNAc(1)	File25315 Spectrum14232 scans: 19441
P02768	NEVTEFAKTCVADESAENCDK	N1(Deamidated);C10(Carbamidomethyl);C19(Carbamidomethyl)	2478.000	2912.16	2	1457.09	2417	-0.0175064	-6.0115	0.0088823	58	0.1589	0.006263	494.1748	HexNAc(1)Neu5Ac(1)	P02768_NEVTEFAKTCVADESAENCDK_HexNAc(1)Neu5Ac(1)	File25315 Spectrum6324 scans: 11076
P02768	HGDLLECADDRADLAKYICENQDSISSK	C7(Carbamidomethyl);C19(Carbamidomethyl)	4206.000	4081.78	5	817.364	3222.46	0.0203622	4.98855	0.009304	58	0.2355	0.007101	859.3070	Hex(1)HexNAc(2)Neu5Ac(1)	P02768_HGDLLECADDRADLAKYICENQDSISSK_Hex(1)HexNAc(2)Neu5Ac(1)	File25315 Spectrum17232 scans: 22591
P02768	AEVENDEMPADLPSLAADFVESK	M8(Oxidation)	4775.000	2898.33	3	967.119	2492.13	0.048505	16.7355	0.2181	57	0.192	0.006263	406.1587	HexNAc(2)	P02768_AEVENDEMPADLPSLAADFVESK_HexNAc(2)	File25315 Spectrum20503 scans: 26028
P02768	CADDRADLAKYICENQDSISSK	C1(Carbamidomethyl);C13(Carbamidomethyl)	2584.000	2923.22	3	975.413	2558.14	-0.0524452	-17.9409	0.00024196	57	0.07782	0.003868	365.1322	Hex(1)HexNAc(1)	P02768_CADDRADLAKYICENQDSISSK_Hex(1)HexNAc(1)	File25315 Spectrum7005 scans: 11802
P01009	DPQGDAAQKTDTSHHDQDHPTFNK	Q8(Deamidated)	2201.000	2893.22	3	965.413	2690.16	-0.0227435	-7.86099	8.7002e-06	57	0.02191	0.002709	203.0794	HexNAc(1)	P01009_DPQGDAAQKTDTSHHDQDHPTFNK_HexNAc(1)	File25315 Spectrum4502 scans: 9163
P05156	ISQMKACDGINDCGDQSDELCCK	Q3(Deamidated);M4(Oxidation);C7(Carbamidomethyl);C13(Carbamidomethyl);C21(Carbamidomethyl);C22(Carbamidomethyl)	2609.000	2923.16	3	975.394	2720.05	0.0330342	11.3008	7.8164e-05	57	0.03998	0.002709	203.0794	HexNAc(1)	P05156_ISQMKACDGINDCGDQSDELCCK_HexNAc(1)	File25315 Spectrum7164 scans: 11969
B9A064	PEQWKSHRSYSCQVTHEGSTVEK	C12(Carbamidomethyl)	2207.000	2962.33	3	988.45	2759.27	-0.0225052	-7.59713	0.0039891	57	0.1307	0.005712	203.0794	HexNAc(1)	B9A064_PEQWKSHRSYSCQVTHEGSTVEK_HexNAc(1)	File25315 Spectrum4543 scans: 9206
P04275	CAPACQVTCQHPEPLACPVQCVEGCHAHCPPGK	C1(Carbamidomethyl);C5(Carbamidomethyl);C9(Carbamidomethyl);C17(Carbamidomethyl);C21(Carbamidomethyl);C25(Carbamidomethyl);C29(Carbamidomethyl)	3414.000	4176.74	5	836.354	3811.6	0.000747867	0.179055	0.168	56	0.125	0.004765	365.1322	Hex(1)HexNAc(1)	P04275_CAPACQVTCQHPEPLACPVQCVEGCHAHCPPGK_Hex(1)HexNAc(1)	File25315 Spectrum12492 scans: 17614
P02671	TKEVVTSEDGSDCPEAMDLGTLSGIGTLDGFR	C13(Carbamidomethyl)	4662.000	3722.64	4	931.666	3356.54	-0.037791	-10.1517	0.065268	56	0.1949	0.006263	365.1322	Hex(1)HexNAc(1)	P02671_TKEVVTSEDGSDCPEAMDLGTLSGIGTLDGFR_Hex(1)HexNAc(1)	File25315 Spectrum19813 scans: 25301
P02746	DYAYNTFQVTTGGMVLKLEQGENVFLQATDK		4127.000	3974.94	5	795.996	3479.69	0.0740624	18.6323	0.047371	55	0.2137	0.006263	494.1748	HexNAc(1)Neu5Ac(1)	P02746_DYAYNTFQVTTGGMVLKLEQGENVFLQATDK_HexNAc(1)Neu5Ac(1)	File25315 Spectrum16737 scans: 22072
P15814	SCQVMHEGSTVEK	C2(Carbamidomethyl);M5(Oxidation)	2250.000	1710.75	2	856.383	1506.64	0.0243007	14.2047	0.0051077	55	0.2131	0.006263	203.0794	HexNAc(1)	P15814_SCQVMHEGSTVEK_HexNAc(1)	File25315 Spectrum4823 scans: 9500
P02790	GNSTHHGPEYMR		2009.000	1895.76	3	632.927	1384.59	-0.0245609	-12.9557	0.24387	53	0.247	0.007101	511.1901	Fuc(1)Hex(1)HexNAc(1)	P02790_GNSTHHGPEYMR_Fuc(1)Hex(1)HexNAc(1)	File25315 Spectrum3315 scans: 7917
P00738	NDVTDIADDGCPKPPEIAHGYVEHSVR	C11(Carbamidomethyl)	3862.000	3501.51	5	701.309	2990.38	-0.0628308	-17.9439	0.53243	53	0.2451	0.007101	511.1901	Fuc(1)Hex(1)HexNAc(1)	P00738_NDVTDIADDGCPKPPEIAHGYVEHSVR_Fuc(1)Hex(1)HexNAc(1)	File25315 Spectrum15194 scans: 20451
Q96PY5	LQVQIQAYLDNVFDVGALLEDAETKNAALER	N26(Deamidated)	3734.000	4103.04	6	684.848	3446.76	0.0580114	14.1386	0.35665	53	0.193	0.006263	656.2276	Hex(1)HexNAc(1)Neu5Ac(1)	Q96PY5_LQVQIQAYLDNVFDVGALLEDAETKNAALER_Hex(1)HexNAc(1)Neu5Ac(1)	File25315 Spectrum14387 scans: 19604
P13671	ENNGQPCINDDEEMKEVDLPEIEADSGCPQPVPPENGFIR	N3(Deamidated);N36(Deamidated);C7(Carbamidomethyl);C28(Carbamidomethyl)	4582.000	4946.11	4	1237.53	4539.96	-0.0134602	-2.72136	0.74148	52	0.1277	0.005712	406.1587	HexNAc(2)	P13671_ENNGQPCINDDEEMKEVDLPEIEADSGCPQPVPPENGFIR_HexNAc(2)	File25315 Spectrum19347 scans: 24812
P04114	VLLQTFLDDASPGDKR	Q4(Deamidated)	4813.000	2432.19	3	811.736	1774.91	0.0470728	19.3541	0.023709	50	0.2558	0.009077	656.2276	Hex(1)HexNAc(1)Neu5Ac(1)	P04114_VLLQTFLDDASPGDKR_Hex(1)HexNAc(1)Neu5Ac(1)	File25315 Spectrum20721 scans: 26259
P02790	MPCPGRGHGHRNGTGHGNSTHHGPEYMR	M1(Oxidation);C3(Carbamidomethyl);N12(Deamidated);N18(Deamidated)	1689.000	3768.49	4	943.129	3111.31	-0.0538947	-14.3014	0.014613	45	0.2166	0.006263	656.2276	Hex(1)HexNAc(1)Neu5Ac(1)	P02790_MPCPGRGHGHRNGTGHGNSTHHGPEYMR_Hex(1)HexNAc(1)Neu5Ac(1)	File25315 Spectrum1358 scans: 5849
Q13263	TEAAIGAPPTATEGPETKPVLMALAEGPGAEGPR		3315.000	3942.82	5	789.571	3285.66	-0.0649582	-16.4751	3.8691	44	0.2348	0.007101	656.2276	Hex(1)HexNAc(1)Neu5Ac(1)	Q13263_TEAAIGAPPTATEGPETKPVLMALAEGPGAEGPR_Hex(1)HexNAc(1)Neu5Ac(1)	File25315 Spectrum11831 scans: 16920
Q9UPN3	AQAESNKAFLAELEQNSPKIQK	Q2(Deamidated);N6(Deamidated);N16(Deamidated)	3861.000	3305.48	3	1102.83	2446.22	-0.0513786	-15.5435	5.6124	43	0.1542	0.006263	859.3070	Hex(1)HexNAc(2)Neu5Ac(1)	Q9UPN3_AQAESNKAFLAELEQNSPKIQK_Hex(1)HexNAc(2)Neu5Ac(1)	File25315 Spectrum15190 scans: 20447
P08397	HEDGPEDDPQLVGITARNIPR	Q10(Deamidated)	3070.000	4152.76	7	594.259	2329.13	-0.0137871	-3.31999	35.099	42	0.04369	0.002709	1823.6453	Fuc(1)Hex(3)HexNAc(3)Neu5Ac(2)	P08397_HEDGPEDDPQLVGITARNIPR_Fuc(1)Hex(3)HexNAc(3)Neu5Ac(2)	File25315 Spectrum10212 scans: 15196
P02768	EVENDEMPADLPSLAADFVESK	N4(Deamidated);M7(Oxidation)	4839.000	2917.27	3	973.431	2422.07	0.0210346	7.21036	0.040013	41	0.1624	0.006263	494.1748	HexNAc(1)Neu5Ac(1)	P02768_EVENDEMPADLPSLAADFVESK_HexNAc(1)Neu5Ac(1)	File25315 Spectrum20873 scans: 26419
P04004	DVFTMPEDEYTVYDDGEEKNNATVHEQVGGPSLTSDLQAQSK	M5(Oxidation);N21(Deamidated);Q27(Deamidated)	4704.000	4865.03	4	1217.27	4661.04	-0.0900764	-18.5151	1.8716	40	0.214	0.006263	203.0794	HexNAc(1)	P04004_DVFTMPEDEYTVYDDGEEKNNATVHEQVGGPSLTSDLQAQSK_HexNAc(1)	File25315 Spectrum20076 scans: 25578
P04004	QCDELCSYYQSCCTDYTAECKPQVTR	C2(Carbamidomethyl);C6(Carbamidomethyl);C12(Carbamidomethyl);C13(Carbamidomethyl);C20(Carbamidomethyl)	4047.000	3524.37	3	1175.8	3321.31	-0.0243478	-6.90841	9.6928e-21	194	5.458e-06	0.001381	203.0794	HexNAc(1)	P04004_QCDELCSYYQSCCTDYTAECKPQVTR_HexNAc(1)	File25372 Spectrum16308 scans: 21620
P36955	AGFEWNEDGAGTTPSPGLQPAHL		4792.000	3298.42	3	1100.48	2351.08	0.0130316	3.95086	1.9871e-15	190	0.0003252	0.001381	947.3230	Hex(1)HexNAc(1)Neu5Ac(2)	P36955_AGFEWNEDGAGTTPSPGLQPAHL_Hex(1)HexNAc(1)Neu5Ac(2)	File25372 Spectrum20718 scans: 26251
P01023	LPEKDLTGFPGPLNDQDNEDCINR	N18(Deamidated);C21(Carbamidomethyl)	4661.000	4580.98	3	1528	2757.26	0.0761822	16.6301	2.6897e-15	181	4.374e-05	0.001381	1823.6453	Fuc(1)Hex(3)HexNAc(3)Neu5Ac(2)	P01023_LPEKDLTGFPGPLNDQDNEDCINR_Fuc(1)Hex(3)HexNAc(3)Neu5Ac(2)	File25372 Spectrum19862 scans: 25352
P0C0L5::P0C0L4	AQETGDNLYWGSVTGSQSNAVSPTPAPR		4408.000	3545.6	3	1182.87	2889.35	0.018142	5.11677	5.5049e-15	180	3.474e-05	0.001381	656.2276	Hex(1)HexNAc(1)Neu5Ac(1)	P0C0L5::P0C0L4_AQETGDNLYWGSVTGSQSNAVSPTPAPR_Hex(1)HexNAc(1)Neu5Ac(1)	File25372 Spectrum18440 scans: 23859
P0C0L5::P0C0L4	WGSVTGSQSNAVSPTPAPR		3472.000	2845.26	2	1423.64	1897.93	0.00740822	2.60371	8.4452e-15	176	1.972e-05	0.001381	947.3230	Hex(1)HexNAc(1)Neu5Ac(2)	P0C0L5::P0C0L4_WGSVTGSQSNAVSPTPAPR_Hex(1)HexNAc(1)Neu5Ac(2)	File25372 Spectrum12898 scans: 18040
Q14624	KIEETTMTTQTPAPIQAPSAILPLPGQSVER	M7(Oxidation)	4767.000	4180	3	1394.34	3319.73	-0.0390556	-9.34343	1.462e-14	173	0.000169	0.001381	859.3070	Hex(1)HexNAc(2)Neu5Ac(1)	Q14624_KIEETTMTTQTPAPIQAPSAILPLPGQSVER_Hex(1)HexNAc(2)Neu5Ac(1)	File25372 Spectrum20555 scans: 26080
P02765	DTRVVHAAKAALAAFNAQNNGSNFQLEEISR	N19(Deamidated);N20(Deamidated)	4674.000	4290.91	3	1431.31	3343.65	-0.0639598	-14.9059	5.3374e-14	170	0.0005048	0.001381	947.3230	Hex(1)HexNAc(1)Neu5Ac(2)	P02765_DTRVVHAAKAALAAFNAQNNGSNFQLEEISR_Hex(1)HexNAc(1)Neu5Ac(2)	File25372 Spectrum19961 scans: 25456
P02760	GPVPTPPDNIQVQENFNISR	N17(Deamidated)	4571.000	2587.24	3	863.421	2222.1	0.0122098	4.71924	7.4306e-14	169	0.0002852	0.001381	365.1322	Hex(1)HexNAc(1)	P02760_GPVPTPPDNIQVQENFNISR_Hex(1)HexNAc(1)	File25372 Spectrum19347 scans: 24811
P05160	GGKDEEVVQCLSDGWSSQPTCR	C10(Carbamidomethyl);C21(Carbamidomethyl)	4054.000	2697.2	2	1349.61	2494.09	0.0319608	11.8496	1.2584e-11	162	0.0007995	0.001381	203.0794	HexNAc(1)	P05160_GGKDEEVVQCLSDGWSSQPTCR_HexNAc(1)	File25372 Spectrum16348 scans: 21662
Q14624	RVMNMKIEETTMTTQTPAPIQAPSAILPLPGQSVER	M3(Oxidation);N4(Deamidated);Q15(Deamidated)	4891.000	4156.01	4	1040.01	3952.99	-0.0649163	-15.6199	7.4077e-12	156	0.0006128	0.001381	203.0794	HexNAc(1)	Q14624_RVMNMKIEETTMTTQTPAPIQAPSAILPLPGQSVER_HexNAc(1)	File25372 Spectrum21297 scans: 26859
P0C0L4	LGVAHNNLMAMAQETGDNLYWGSVTGSQSNAVSPTPAPR	M9(Oxidation);M11(Oxidation)	4311.000	4932.19	4	1234.05	4072.9	-0.017233	-3.49398	6.0471e-18	155	1.817e-06	0.001381	859.3070	Hex(1)HexNAc(2)Neu5Ac(1)	P0C0L4_LGVAHNNLMAMAQETGDNLYWGSVTGSQSNAVSPTPAPR_Hex(1)HexNAc(2)Neu5Ac(1)	File25372 Spectrum17894 scans: 23286
P0C0L5	ADLRGVAHNNLMAMAQETGDNLYWGSVTGSQSNAVSPTPAPR	M12(Oxidation);M14(Oxidation)	4461.000	4910.17	4	1228.55	4415.07	-0.0778695	-15.8588	1.342e-14	152	5.168e-06	0.001381	494.1748	HexNAc(1)Neu5Ac(1)	P0C0L5_ADLRGVAHNNLMAMAQETGDNLYWGSVTGSQSNAVSPTPAPR_HexNAc(1)Neu5Ac(1)	File25372 Spectrum18727 scans: 24160
P02790	LAIATPLPPTSAHGNVAEGETKPDPDVTER	N15(Deamidated)	2862.000	3739.7	3	1247.57	3083.54	-0.0721527	-19.2937	6.9074e-16	152	2.832e-05	0.001381	656.2276	Hex(1)HexNAc(1)Neu5Ac(1)	P02790_LAIATPLPPTSAHGNVAEGETKPDPDVTER_Hex(1)HexNAc(1)Neu5Ac(1)	File25372 Spectrum8852 scans: 13760
P0C0L5	GVAHNNLMAMAQETGDNLYWGSVTGSQSNAVSPTPAPR	M8(Oxidation);M10(Oxidation);Q12(Deamidated)	4285.000	4618.04	4	1155.52	3960.8	0.0133468	2.89014	2.7024e-11	139	3.852e-05	0.001381	656.2276	Hex(1)HexNAc(1)Neu5Ac(1)	P0C0L5_GVAHNNLMAMAQETGDNLYWGSVTGSQSNAVSPTPAPR_Hex(1)HexNAc(1)Neu5Ac(1)	File25372 Spectrum17749 scans: 23133
P19827	FVLSALQPSPTHSSSNTQR	N16(Deamidated)	3068.000	2568.19	3	857.071	2057.02	-0.0155116	-6.03987	4.7826e-11	138	0.0007382	0.001381	511.1901	Fuc(1)Hex(1)HexNAc(1)	P19827_FVLSALQPSPTHSSSNTQR_Fuc(1)Hex(1)HexNAc(1)	File25372 Spectrum10221 scans: 15198
P0C0L5::P0C0L4	GSVTGSQSNAVSPTPAPR		2543.000	2368.08	2	1185.05	1711.85	0.000921181	0.388999	9.6091e-09	137	0.00107	0.001381	656.2276	Hex(1)HexNAc(1)Neu5Ac(1)	P0C0L5::P0C0L4_GSVTGSQSNAVSPTPAPR_Hex(1)HexNAc(1)Neu5Ac(1)	File25372 Spectrum6773 scans: 11546
P06396	EEGTEPEAMLQVLGPKPALPAGTEDTAKEDAANR	M9(Oxidation)	4520.000	3956.94	4	990.242	3550.71	0.0716725	18.1131	2.0097e-14	136	0.0001128	0.001381	406.1587	HexNAc(2)	P06396_EEGTEPEAMLQVLGPKPALPAGTEDTAKEDAANR_HexNAc(2)	File25372 Spectrum19065 scans: 24515
P02751	EWTCIAYSQLRDQCIVDDITYNVNDTFHK	C4(Carbamidomethyl);Q9(Deamidated);Q13(Deamidated);C14(Carbamidomethyl);N24(Deamidated)	4677.000	4118.76	3	1373.93	3606.59	-0.0293127	-7.11688	2.3133e-09	135	0.002057	0.001381	511.1901	Fuc(1)Hex(1)HexNAc(1)	P02751_EWTCIAYSQLRDQCIVDDITYNVNDTFHK_Fuc(1)Hex(1)HexNAc(1)	File25372 Spectrum19983 scans: 25479
O75882	NSSDTVECECSENWKGEACDIPHCTDNCGFPHR	C8(Carbamidomethyl);C10(Carbamidomethyl);C19(Carbamidomethyl);C24(Carbamidomethyl);C28(Carbamidomethyl)	3558.000	4170.66	3	1391.23	3967.53	0.0481669	11.549	1.9773e-09	131	0.001606	0.001381	203.0794	HexNAc(1)	O75882_NSSDTVECECSENWKGEACDIPHCTDNCGFPHR_HexNAc(1)	File25372 Spectrum13414 scans: 18582
P01042	IASFSQNCDIYPGKDFVQPPTKICVGCPR	C8(Carbamidomethyl);C24(Carbamidomethyl);C27(Carbamidomethyl)	4545.000	4009.81	4	1003.46	3353.6	-0.0134292	-3.34909	6.8535e-11	130	0.0005288	0.001381	656.2276	Hex(1)HexNAc(1)Neu5Ac(1)	P01042_IASFSQNCDIYPGKDFVQPPTKICVGCPR_Hex(1)HexNAc(1)Neu5Ac(1)	File25372 Spectrum19202 scans: 24659
P05155	ASSNPNATSSSSQDPESLQDRGEGK	N6(Deamidated)	2434.000	3205.35	3	1069.46	2549.11	0.0111097	3.46598	7.6808e-09	126	0.006937	0.001381	656.2276	Hex(1)HexNAc(1)Neu5Ac(1)	P05155_ASSNPNATSSSSQDPESLQDRGEGK_Hex(1)HexNAc(1)Neu5Ac(1)	File25372 Spectrum6083 scans: 10804
P02768	AEFAEVSKLVTDLTKVHTECCHGDLLECADDR	C20(Carbamidomethyl);C21(Carbamidomethyl);C28(Carbamidomethyl)	3288.000	4374.93	4	1094.74	3717.71	-0.0112701	-2.57606	8.6714e-13	126	0.0006442	0.001381	656.2276	Hex(1)HexNAc(1)Neu5Ac(1)	P02768_AEFAEVSKLVTDLTKVHTECCHGDLLECADDR_Hex(1)HexNAc(1)Neu5Ac(1)	File25372 Spectrum11664 scans: 16744
P00747	EASVVAPPPVVLLPDVETPSEEDCMFGNGK	C24(Carbamidomethyl);M25(Oxidation);N28(Deamidated)	5055.000	3605.63	3	1202.88	3199.49	-0.0247275	-6.85802	3.6963e-08	126	0.003734	0.001381	406.1587	HexNAc(2)	P00747_EASVVAPPPVVLLPDVETPSEEDCMFGNGK_HexNAc(2)	File25372 Spectrum22242 scans: 27859
P01599	LLWFPGARCDIQMTQSPSSLSASVGDR	C9(Carbamidomethyl)	3924.000	3343.54	3	1115.52	2978.44	-0.0318903	-9.5379	2.2592e-07	126	0.007895	0.001381	365.1322	Hex(1)HexNAc(1)	P01599_LLWFPGARCDIQMTQSPSSLSASVGDR_Hex(1)HexNAc(1)	File25372 Spectrum15614 scans: 20892
P04275	KVNCTTQPCPTAKAPTCGLCEVAR	N3(Deamidated);C4(Carbamidomethyl);C9(Carbamidomethyl);C17(Carbamidomethyl);C20(Carbamidomethyl)	3380.000	3666.59	3	1223.2	2719.26	0.0121597	3.31635	1.5667e-09	124	0.01007	0.001381	947.3230	Hex(1)HexNAc(1)Neu5Ac(2)	P04275_KVNCTTQPCPTAKAPTCGLCEVAR_Hex(1)HexNAc(1)Neu5Ac(2)	File25372 Spectrum12282 scans: 17393
P09871	DSCKGDSGGAFAVQDPNDK	C3(Carbamidomethyl)	2694.000	2170.89	2	1086.45	1966.83	-0.0239051	-11.0117	2.9009e-11	123	0.001416	0.001381	203.0794	HexNAc(1)	P09871_DSCKGDSGGAFAVQDPNDK_HexNAc(1)	File25372 Spectrum7756 scans: 12592
P01876	HVKHYTNPSQDVTVPCPVPSTPPTPSPSTPPTPSPSCCHPR	C37(Carbamidomethyl);C38(Carbamidomethyl);N7(Deamidated);Q10(Deamidated);C16(Carbamidomethyl)	3704.000	4706.1	4	1177.53	4502.07	-0.0535287	-11.3743	1.3937e-09	122	0.001048	0.001381	203.0794	HexNAc(1)	P01876_HVKHYTNPSQDVTVPCPVPSTPPTPSPSTPPTPSPSCCHPR_HexNAc(1)	File25372 Spectrum14229 scans: 19437
P00747	ELCAGHLAGGTDSCQGDSGGPLVCFEKDK	C3(Carbamidomethyl);C14(Carbamidomethyl);C24(Carbamidomethyl)	4251.000	3559.52	3	1187.51	3064.33	0.00583273	1.63863	1.0442e-09	122	0.001249	0.001381	494.1748	HexNAc(1)Neu5Ac(1)	P00747_ELCAGHLAGGTDSCQGDSGGPLVCFEKDK_HexNAc(1)Neu5Ac(1)	File25372 Spectrum17557 scans: 22932
P02790	TPLPPTSAHGNVAEGETKPDPDVTER		2943.000	2918.44	3	973.82	2714.31	0.0417498	14.3055	1.142e-11	122	0.0002702	0.001381	203.0794	HexNAc(1)	P02790_TPLPPTSAHGNVAEGETKPDPDVTER_HexNAc(1)	File25372 Spectrum9393 scans: 14328
P01876	HVKHYTNPSQDVTVPCPVPSTPPTPSPSTPPTPSPSCCHPR	C37(Carbamidomethyl);C38(Carbamidomethyl);N7(Deamidated);Q10(Deamidated);C16(Carbamidomethyl)	3665.000	4868.17	5	974.641	4502.07	-0.0399052	-8.19716	3.505e-10	121	8.61e-05	0.001381	365.1322	Hex(1)HexNAc(1)	P01876_HVKHYTNPSQDVTVPCPVPSTPPTPSPSTPPTPSPSCCHPR_Hex(1)HexNAc(1)	File25372 Spectrum14006 scans: 19203
P0C0L5::P0C0L4	GSVTGSQSNAVSPTPAPR		2624.000	2659.18	3	887.4	1711.85	0.00744471	2.79963	4.7581e-07	119	0.005576	0.001381	947.3230	Hex(1)HexNAc(1)Neu5Ac(2)	P0C0L5::P0C0L4_GSVTGSQSNAVSPTPAPR_Hex(1)HexNAc(1)Neu5Ac(2)	File25372 Spectrum7306 scans: 12108
Q14624	SALQLQDFYQEVANPLLTAVTFEYPSNAVEEVTQNNFR	Q6(Deamidated);Q10(Deamidated);N14(Deamidated)	4243.000	4860.28	4	1216.08	4348.07	0.0139817	2.87674	6.5457e-08	118	0.000292	0.001381	511.1901	Fuc(1)Hex(1)HexNAc(1)	Q14624_SALQLQDFYQEVANPLLTAVTFEYPSNAVEEVTQNNFR_Fuc(1)Hex(1)HexNAc(1)	File25372 Spectrum17502 scans: 22874
P02768	HCIAEVENDEMPADLPSLAADFVESK	C2(Carbamidomethyl)	4833.000	3292.46	3	1098.49	2886.31	-0.00670444	-2.0363	9.0077e-10	117	0.0007671	0.001381	406.1587	HexNAc(2)	P02768_HCIAEVENDEMPADLPSLAADFVESK_HexNAc(2)	File25372 Spectrum20948 scans: 26492
P01715	TQPPSVSVSPGQTASITCSGDKLGDK	C18(Carbamidomethyl)	4171.000	3023.47	3	1008.83	2616.27	0.0424918	14.054	1.2634e-10	117	0.0004241	0.001381	406.1587	HexNAc(2)	P01715_TQPPSVSVSPGQTASITCSGDKLGDK_HexNAc(2)	File25372 Spectrum17066 scans: 22416
P04004	EDGVLDPDYPRNISDGFDGIPDNVDAALALPAHSYSGR	N12(Deamidated);N23(Deamidated)	4806.000	4978.12	4	1245.54	4029.85	-0.0598234	-12.0173	1.393e-07	117	0.003351	0.001381	947.3230	Hex(1)HexNAc(1)Neu5Ac(2)	P04004_EDGVLDPDYPRNISDGFDGIPDNVDAALALPAHSYSGR_Hex(1)HexNAc(1)Neu5Ac(2)	File25372 Spectrum20797 scans: 26334
P04004	SYYQSCCTDYTAECKPQVTR	C6(Carbamidomethyl);C7(Carbamidomethyl);C14(Carbamidomethyl)	4203.000	3375.31	3	1126.11	2516.04	-0.0349736	-10.3616	6.8417e-08	117	0.01158	0.001381	859.3070	Hex(1)HexNAc(2)Neu5Ac(1)	P04004_SYYQSCCTDYTAECKPQVTR_Hex(1)HexNAc(2)Neu5Ac(1)	File25372 Spectrum17265 scans: 22625
P00450	TFHSHGITYYKEHEGAIYPDNTTDFQR	N21(Deamidated)	3399.000	3883.69	5	777.745	3227.46	0.00206137	0.530777	2.8462e-08	117	0.00357	0.001381	656.2276	Hex(1)HexNAc(1)Neu5Ac(1)	P00450_TFHSHGITYYKEHEGAIYPDNTTDFQR_Hex(1)HexNAc(1)Neu5Ac(1)	File25372 Spectrum12404 scans: 17521
B9A064	YVFGTGTKVTVLGQPKANPTVTLFPPSSEELQANK	Q14(Deamidated);N18(Deamidated)	4635.000	4086.05	4	1022.52	3719.93	-0.0143833	-3.52009	8.9509e-10	117	0.0009671	0.001381	365.1322	Hex(1)HexNAc(1)	B9A064_YVFGTGTKVTVLGQPKANPTVTLFPPSSEELQANK_Hex(1)HexNAc(1)	File25372 Spectrum19702 scans: 25184
P02671	GGSTSYGTGSETESPR		1967.000	1936.81	2	969.41	1571.67	0.00308858	1.59468	1.2946e-10	115	0.00088	0.001381	365.1322	Hex(1)HexNAc(1)	P02671_GGSTSYGTGSETESPR_Hex(1)HexNAc(1)	File25372 Spectrum3084 scans: 7655
P00747	PSCDSSPVSTEQLAPTAPPELTPVVQDCYHGDGQSYR	C3(Carbamidomethyl);Q12(Deamidated);C28(Carbamidomethyl)	4549.000	4541.05	4	1136.27	4045.79	0.0802352	17.6689	1.4945e-08	115	0.0004119	0.001381	494.1748	HexNAc(1)Neu5Ac(1)	P00747_PSCDSSPVSTEQLAPTAPPELTPVVQDCYHGDGQSYR_HexNAc(1)Neu5Ac(1)	File25372 Spectrum19227 scans: 24685
P02768	CEKPLLEKSHCIAEVENDEMPADLPSLAADFVESK	C1(Carbamidomethyl);C11(Carbamidomethyl);N17(Deamidated)	4824.000	4629.05	4	1158.27	3971.85	-0.0294459	-6.36112	5.581e-08	115	0.0005559	0.001381	656.2276	Hex(1)HexNAc(1)Neu5Ac(1)	P02768_CEKPLLEKSHCIAEVENDEMPADLPSLAADFVESK_Hex(1)HexNAc(1)Neu5Ac(1)	File25372 Spectrum20893 scans: 26435
P02768	VKLVNEVTEFAKTCVADESAENCDK	N5(Deamidated);C14(Carbamidomethyl);C23(Carbamidomethyl)	1956.000	4680.9	3	1561.31	2856.32	-0.0638378	-13.6379	6.9935e-05	113	0.03156	0.001381	1823.6453	Fuc(1)Hex(3)HexNAc(3)Neu5Ac(2)	P02768_VKLVNEVTEFAKTCVADESAENCDK_Fuc(1)Hex(3)HexNAc(3)Neu5Ac(2)	File25372 Spectrum3023 scans: 7591
P05546	GGSKGPLDQLEKGGETAQSADPQWEQLNNK	Q9(Deamidated)	3393.000	3694.65	3	1232.56	3182.51	-0.0500121	-13.5364	3.3464e-06	112	0.005681	0.001381	511.1901	Fuc(1)Hex(1)HexNAc(1)	P05546_GGSKGPLDQLEKGGETAQSADPQWEQLNNK_Fuc(1)Hex(1)HexNAc(1)	File25372 Spectrum12367 scans: 17482
Q14624	TQTPAPIQAPSAILPLPGQSVER	Q2(Deamidated)	4816.000	2574.32	2	1288.17	2371.27	-0.0326781	-12.6939	1.3521e-08	112	0.006775	0.001381	203.0794	HexNAc(1)	Q14624_TQTPAPIQAPSAILPLPGQSVER_HexNAc(1)	File25372 Spectrum20850 scans: 26390
P01860	VVTVPSSSLGTQTYTCNVNHKPSNTK	C16(Carbamidomethyl);N19(Deamidated)	4211.000	3313.57	4	829.399	2819.38	0.0145219	4.38257	2.3384e-08	112	0.004673	0.001381	494.1748	HexNAc(1)Neu5Ac(1)	P01860_VVTVPSSSLGTQTYTCNVNHKPSNTK_HexNAc(1)Neu5Ac(1)	File25372 Spectrum17317 scans: 22680
P01593	WLSGARCDIQMTQSPSSLSASVGDR	C7(Carbamidomethyl);Q10(Deamidated)	3279.000	3656.52	4	915.137	2709.25	-0.0519691	-14.2127	3.4726e-08	111	0.01036	0.001381	947.3230	Hex(1)HexNAc(1)Neu5Ac(2)	P01593_WLSGARCDIQMTQSPSSLSASVGDR_Hex(1)HexNAc(1)Neu5Ac(2)	File25372 Spectrum11607 scans: 16684
P02768	IAEVENDEMPADLPSLAADFVESK	N6(Deamidated)	4833.000	2997.31	2	1499.66	2590.2	-0.0471521	-15.7315	1.1448e-07	111	0.008282	0.001381	406.1587	HexNAc(2)	P02768_IAEVENDEMPADLPSLAADFVESK_HexNAc(2)	File25372 Spectrum20944 scans: 26488
P0C0L5::P0C0L4	WGSVTGSQSNAVSPTPAPR		3336.000	2555.16	2	1278.59	1897.93	-0.00226042	-0.884651	3.5738e-08	110	0.0009141	0.001381	656.2276	Hex(1)HexNAc(1)Neu5Ac(1)	P0C0L5::P0C0L4_WGSVTGSQSNAVSPTPAPR_Hex(1)HexNAc(1)Neu5Ac(1)	File25372 Spectrum11986 scans: 17082
A0A0C4DH72	LWLPGARCAIQMTQSPSSLSASVGDR	C8(Carbamidomethyl);Q11(Deamidated)	3926.000	4611.94	4	1153.99	2788.36	-0.0736392	-15.9671	2.7024e-05	110	0.04117	0.001381	1823.6453	Fuc(1)Hex(3)HexNAc(3)Neu5Ac(2)	A0A0C4DH72_LWLPGARCAIQMTQSPSSLSASVGDR_Fuc(1)Hex(3)HexNAc(3)Neu5Ac(2)	File25372 Spectrum15627 scans: 20905
P02768	ENDEMPADLPSLAADFVESK		4759.000	4000.69	3	1334.57	2176.98	0.0633405	15.8324	7.837e-06	110	0.03073	0.001381	1823.6453	Fuc(1)Hex(3)HexNAc(3)Neu5Ac(2)	P02768_ENDEMPADLPSLAADFVESK_Fuc(1)Hex(3)HexNAc(3)Neu5Ac(2)	File25372 Spectrum20504 scans: 26026
P01023	VPGHVTVSICRKYSDASDCHGEDSQAFCEK	C10(Carbamidomethyl);C19(Carbamidomethyl);C28(Carbamidomethyl)	2215.000	4298.76	3	1433.93	3438.5	-0.0540205	-12.5665	1.9663e-05	109	0.04998	0.002149	859.3070	Hex(1)HexNAc(2)Neu5Ac(1)	P01023_VPGHVTVSICRKYSDASDCHGEDSQAFCEK_Hex(1)HexNAc(2)Neu5Ac(1)	File25372 Spectrum4651 scans: 9301
P02675	DNENVVNEYSSELEK	N2(Deamidated)	4557.000	2717.06	3	906.692	1768.76	-0.0344165	-12.6668	1.1841e-09	109	0.003433	0.001381	947.3230	Hex(1)HexNAc(1)Neu5Ac(2)	P02675_DNENVVNEYSSELEK_Hex(1)HexNAc(1)Neu5Ac(2)	File25372 Spectrum19268 scans: 24728
P02671	VLSVVGTAWTADSGEGDFLAEGGGVR		4180.000	3497.5	3	1166.84	2549.24	-0.0665943	-19.0405	2.319e-06	109	0.01281	0.001381	947.3230	Hex(1)HexNAc(1)Neu5Ac(2)	P02671_VLSVVGTAWTADSGEGDFLAEGGGVR_Hex(1)HexNAc(1)Neu5Ac(2)	File25372 Spectrum17122 scans: 22475
P05155	KMLFVEPILEVSSLPTTNSTTNSATK	M2(Oxidation);N18(Deamidated)	5191.000	4649.07	4	1163.28	2824.44	-0.0164667	-3.54192	0.0013339	108	0.05572	0.002149	1823.6453	Fuc(1)Hex(3)HexNAc(3)Neu5Ac(2)	P05155_KMLFVEPILEVSSLPTTNSTTNSATK_Fuc(1)Hex(3)HexNAc(3)Neu5Ac(2)	File25372 Spectrum23003 scans: 28674
P02790	ATPLPPTSAHGNVAEGETKPDPDVTER		2965.000	4609.99	4	1153.51	2785.35	-0.00754044	-1.63567	8.8007e-06	108	0.006709	0.001381	1823.6453	Fuc(1)Hex(3)HexNAc(3)Neu5Ac(2)	P02790_ATPLPPTSAHGNVAEGETKPDPDVTER_Fuc(1)Hex(3)HexNAc(3)Neu5Ac(2)	File25372 Spectrum9534 scans: 14476
P02768	ADLPSLAADFVESK		4834.000	3285.41	3	1096.14	1461.74	0.0327457	9.967	0.00022269	107	0.03211	0.001381	1823.6453	Fuc(1)Hex(3)HexNAc(3)Neu5Ac(2)	P02768_ADLPSLAADFVESK_Fuc(1)Hex(3)HexNAc(3)Neu5Ac(2)	File25372 Spectrum20951 scans: 26496
P02768	SHCIAEVENDEMPADLPSLAADFVESK	C3(Carbamidomethyl)	4643.000	3468.58	3	1157.2	2973.34	0.0617985	17.8167	6.4406e-05	107	0.03341	0.001381	494.1748	HexNAc(1)Neu5Ac(1)	P02768_SHCIAEVENDEMPADLPSLAADFVESK_HexNAc(1)Neu5Ac(1)	File25372 Spectrum19746 scans: 25230
P10909	LLTWESGQVLGDQTVSDNELQEMSNQGSK		3828.000	4139.75	4	1035.94	3192.49	-0.0614074	-14.8336	1.4764e-06	106	0.01012	0.001381	947.3230	Hex(1)HexNAc(1)Neu5Ac(2)	P10909_LLTWESGQVLGDQTVSDNELQEMSNQGSK_Hex(1)HexNAc(1)Neu5Ac(2)	File25372 Spectrum15029 scans: 20277
P04196	GPPLPQGPPPLLPMSCSSCQHATFGTNGAQR	C16(Carbamidomethyl);C19(Carbamidomethyl);N27(Deamidated)	4141.000	3754.7	5	751.946	3260.52	0.00429567	1.14408	3.9221e-09	106	0.001316	0.001381	494.1748	HexNAc(1)Neu5Ac(1)	P04196_GPPLPQGPPPLLPMSCSSCQHATFGTNGAQR_HexNAc(1)Neu5Ac(1)	File25372 Spectrum16879 scans: 22220
P02768	TLEKCCAAADPHECYAK	C5(Carbamidomethyl);C6(Carbamidomethyl);C14(Carbamidomethyl)	3023.000	2680.12	3	894.381	2022.86	0.0318353	11.8783	1.6014e-08	106	0.006128	0.001381	656.2276	Hex(1)HexNAc(1)Neu5Ac(1)	P02768_TLEKCCAAADPHECYAK_Hex(1)HexNAc(1)Neu5Ac(1)	File25372 Spectrum9913 scans: 14874
P04114	EQDMVNGIMLSVEK	N6(Deamidated)	4080.000	2087.95	2	1044.98	1592.74	0.0345836	16.5634	1.4093e-06	105	0.01543	0.001381	494.1748	HexNAc(1)Neu5Ac(1)	P04114_EQDMVNGIMLSVEK_HexNAc(1)Neu5Ac(1)	File25372 Spectrum16503 scans: 21825
Q13790	SGVQQLIQYYQDQKDANISQPETTKEGLR	N17(Deamidated)	4562.000	3993.89	4	999.479	3337.64	0.0166658	4.17284	2.0572e-08	105	0.003857	0.001381	656.2276	Hex(1)HexNAc(1)Neu5Ac(1)	Q13790_SGVQQLIQYYQDQKDANISQPETTKEGLR_Hex(1)HexNAc(1)Neu5Ac(1)	File25372 Spectrum19298 scans: 24760
P00450	EDNIRMFTTAPDQVDKEDEDFQESNK	N3(Deamidated)	3560.000	3596.54	3	1199.85	3101.34	0.0205334	5.70921	1.5922e-05	104	0.04278	0.001381	494.1748	HexNAc(1)Neu5Ac(1)	P00450_EDNIRMFTTAPDQVDKEDEDFQESNK_HexNAc(1)Neu5Ac(1)	File25372 Spectrum13423 scans: 18591
P04217	QNGWSGDSAPVELILSDETLPAPEFSPEPESGR	Q1(Deamidated);N2(Deamidated)	4894.000	4007.85	4	1002.97	3512.61	0.0641064	15.9952	7.7998e-06	104	0.00317	0.001381	494.1748	HexNAc(1)Neu5Ac(1)	P04217_QNGWSGDSAPVELILSDETLPAPEFSPEPESGR_HexNAc(1)Neu5Ac(1)	File25372 Spectrum21311 scans: 26874
P01857::P01860	CNVNHKPSNTKVDK	C1(Carbamidomethyl);N4(Deamidated)	1721.000	2005.96	2	1003.99	1640.79	0.0347935	17.3451	2.0379e-07	103	0.01087	0.001381	365.1322	Hex(1)HexNAc(1)	P01857::P01860_CNVNHKPSNTKVDK_Hex(1)HexNAc(1)	File25372 Spectrum1568 scans: 6054
P02768	AEVENDEMPADLPSLAADFVESK	N5(Deamidated)	4755.000	3337.47	3	1113.5	2477.12	0.0494354	14.8122	5.9186e-05	103	0.01553	0.001381	859.3070	Hex(1)HexNAc(2)Neu5Ac(1)	P02768_AEVENDEMPADLPSLAADFVESK_Hex(1)HexNAc(2)Neu5Ac(1)	File25372 Spectrum20480 scans: 26001
P00450	NIRMFTTAPDQVDKEDEDFQESNK		3328.000	3715.6	3	1239.54	2856.29	0.00335381	0.90263	3.2962e-07	102	0.01733	0.001381	859.3070	Hex(1)HexNAc(2)Neu5Ac(1)	P00450_NIRMFTTAPDQVDKEDEDFQESNK_Hex(1)HexNAc(2)Neu5Ac(1)	File25372 Spectrum11927 scans: 17020
P01834	EAKVQWKVDNALQSGNSQESVTEQDSK	Q5(Deamidated);N10(Deamidated);Q13(Deamidated)	2795.000	3867.64	3	1290.22	3007.39	-0.0590313	-15.2629	3.149e-06	102	0.0249	0.001381	859.3070	Hex(1)HexNAc(2)Neu5Ac(1)	P01834_EAKVQWKVDNALQSGNSQESVTEQDSK_Hex(1)HexNAc(2)Neu5Ac(1)	File25372 Spectrum8409 scans: 13294
P62736	NEMATAASSSSLEKSYELPDGQVITIGNER	N1(Deamidated);M3(Oxidation)	4629.000	3579.64	4	895.918	3213.5	0.00909365	2.54038	2.3039e-06	101	0.009414	0.001381	365.1322	Hex(1)HexNAc(1)	P62736_NEMATAASSSSLEKSYELPDGQVITIGNER_Hex(1)HexNAc(1)	File25372 Spectrum19669 scans: 25149
P01834	KVDNALQSGNSQESVTEQDSK	N4(Deamidated)	4122.000	2776.28	3	926.434	2264.04	0.0473742	17.0639	1.4752e-06	100	0.01852	0.001381	511.1901	Fuc(1)Hex(1)HexNAc(1)	P01834_KVDNALQSGNSQESVTEQDSK_Fuc(1)Hex(1)HexNAc(1)	File25372 Spectrum16764 scans: 22099
P00738	WINKAVGDKLPECEADDGCPKPPEIAHGYVEHSVR	N3(Deamidated);C13(Carbamidomethyl);C19(Carbamidomethyl)	3686.000	4834.19	4	1209.55	3973.87	0.00310409	0.642112	1.5616e-05	100	0.003938	0.001381	859.3070	Hex(1)HexNAc(2)Neu5Ac(1)	P00738_WINKAVGDKLPECEADDGCPKPPEIAHGYVEHSVR_Hex(1)HexNAc(2)Neu5Ac(1)	File25372 Spectrum14121 scans: 19324
P02768	CIAEVENDEMPADLPSLAADFVESK	C1(Carbamidomethyl);M10(Oxidation)	4860.000	3259.4	3	1087.47	2765.24	-0.0155072	-4.75769	1.253e-05	99	0.0279	0.001381	494.1748	HexNAc(1)Neu5Ac(1)	P02768_CIAEVENDEMPADLPSLAADFVESK_HexNAc(1)Neu5Ac(1)	File25372 Spectrum21108 scans: 26660
P01857	SSVVTVPSSSLGTQTYICNVNHKPSNTKVDK	C18(Carbamidomethyl);N21(Deamidated)	3995.000	3550.79	3	1184.6	3347.67	0.046736	13.1621	1.8359e-07	98	0.005078	0.001381	203.0794	HexNAc(1)	P01857_SSVVTVPSSSLGTQTYICNVNHKPSNTKVDK_HexNAc(1)	File25372 Spectrum16006 scans: 21303
P01859	NQVSLTCLVKGFYPSDISVEWESNGQPENNYK	C7(Carbamidomethyl);N29(Deamidated)	4721.000	4213.97	3	1405.66	3702.71	0.0637636	15.1315	1.6601e-07	98	0.01631	0.001381	511.1901	Fuc(1)Hex(1)HexNAc(1)	P01859_NQVSLTCLVKGFYPSDISVEWESNGQPENNYK_Fuc(1)Hex(1)HexNAc(1)	File25372 Spectrum20268 scans: 25778
P02768	ENDEMPADLPSLAADFVESK		4843.000	3125.33	3	1042.78	2176.98	0.0205718	6.58229	8.5814e-05	98	0.02161	0.001381	947.3230	Hex(1)HexNAc(1)Neu5Ac(2)	P02768_ENDEMPADLPSLAADFVESK_Hex(1)HexNAc(1)Neu5Ac(2)	File25372 Spectrum21004 scans: 26551
P02679	KDTVQIHDITGKDCQDIANK	C14(Carbamidomethyl)	3381.000	2955.32	3	986.114	2298.13	-0.037707	-12.759	2.0207e-06	97	0.01783	0.001381	656.2276	Hex(1)HexNAc(1)Neu5Ac(1)	P02679_KDTVQIHDITGKDCQDIANK_Hex(1)HexNAc(1)Neu5Ac(1)	File25372 Spectrum12284 scans: 17395
Q92954	VTTPDTSTTQHNK		1988.000	2084.91	3	695.979	1428.68	0.0018843	0.90378	4.0913e-07	97	0.01491	0.001381	656.2276	Hex(1)HexNAc(1)Neu5Ac(1)	Q92954_VTTPDTSTTQHNK_Hex(1)HexNAc(1)Neu5Ac(1)	File25372 Spectrum3218 scans: 7796
P01599	GLLLLWFPGARCDIQMTQSPSSLSASVGDR	C12(Carbamidomethyl);Q15(Deamidated)	4067.000	3757.74	4	940.441	3262.61	-0.0538427	-14.3285	1.425e-06	96	0.008689	0.001381	494.1748	HexNAc(1)Neu5Ac(1)	P01599_GLLLLWFPGARCDIQMTQSPSSLSASVGDR_HexNAc(1)Neu5Ac(1)	File25372 Spectrum16426 scans: 21744
P02749	EDAQCIDGTIEVPK	C5(Carbamidomethyl)	4655.000	2067.88	2	1034.95	1573.73	-0.0259405	-12.5445	1.589e-05	96	0.02507	0.001381	494.1748	HexNAc(1)Neu5Ac(1)	P02749_EDAQCIDGTIEVPK_HexNAc(1)Neu5Ac(1)	File25372 Spectrum19819 scans: 25307
P02768	LVNEVTEFAKTCVADESAENCDK	N3(Deamidated);C12(Carbamidomethyl);C21(Carbamidomethyl)	4910.000	2833.23	3	945.419	2629.15	-6.08274e-05	-0.0214693	6.3221e-11	96	0.003979	0.001381	203.0794	HexNAc(1)	P02768_LVNEVTEFAKTCVADESAENCDK_HexNAc(1)	File25372 Spectrum21411 scans: 26979
P04004	VFTMPEDEYTVYDDGEEKNNATVHEQVGGPSLTSDLQAQSK	N20(Deamidated)	4658.000	4895.08	4	1224.78	4529.03	-0.0858031	-17.5284	8.8645e-07	96	0.001886	0.001381	365.1322	Hex(1)HexNAc(1)	P04004_VFTMPEDEYTVYDDGEEKNNATVHEQVGGPSLTSDLQAQSK_Hex(1)HexNAc(1)	File25372 Spectrum19845 scans: 25334
P01023	SDCHGEDSQAFCEK	C3(Carbamidomethyl);C12(Carbamidomethyl)	2707.000	2324.83	2	1163.42	1668.61	-0.00778716	-3.34955	1.435e-06	94	0.02006	0.001381	656.2276	Hex(1)HexNAc(1)Neu5Ac(1)	P01023_SDCHGEDSQAFCEK_Hex(1)HexNAc(1)Neu5Ac(1)	File25372 Spectrum7846 scans: 12686
P12259	FTVNNLAEPQKAPSHQQATTAGSPLR	N4(Deamidated)	3788.000	3711.75	4	928.944	2763.39	0.02622	7.06406	5.3137e-06	94	0.01518	0.001381	947.3230	Hex(1)HexNAc(1)Neu5Ac(2)	P12259_FTVNNLAEPQKAPSHQQATTAGSPLR_Hex(1)HexNAc(1)Neu5Ac(2)	File25372 Spectrum14765 scans: 20000
P02671	GPGSTGSWNSGSSGTGSTGNQNPGSPRPGSTGTWNPGSSER	N9(Deamidated)	3005.000	4416.96	4	1105.25	3904.69	0.0822197	18.6145	3.08e-06	93	0.001382	0.001381	511.1901	Fuc(1)Hex(1)HexNAc(1)	P02671_GPGSTGSWNSGSSGTGSTGNQNPGSPRPGSTGTWNPGSSER_Fuc(1)Hex(1)HexNAc(1)	File25372 Spectrum9797 scans: 14753
P01857::P01861	LVKGFYPSDIAVEWESNGQPENNYK	N17(Deamidated);N22(Deamidated)	4736.000	3833.62	3	1278.88	2885.34	-0.045168	-11.7821	0.00011213	92	0.06719	0.002149	947.3230	Hex(1)HexNAc(1)Neu5Ac(2)	P01857::P01861_LVKGFYPSDIAVEWESNGQPENNYK_Hex(1)HexNAc(1)Neu5Ac(2)	File25372 Spectrum20361 scans: 25876
P02751	MVQPQSPVAVSQSKPGCYDNGKHYQINQQWER	Q3(Deamidated);Q5(Deamidated);C17(Carbamidomethyl);N20(Deamidated)	3464.000	4256.97	4	1065.25	3761.72	0.071382	16.7683	1.4187e-05	92	0.009642	0.001381	494.1748	HexNAc(1)Neu5Ac(1)	P02751_MVQPQSPVAVSQSKPGCYDNGKHYQINQQWER_HexNAc(1)Neu5Ac(1)	File25372 Spectrum12848 scans: 17987
P02774	FASNCCSINSPPLYCDSEIDAELK	C5(Carbamidomethyl);C6(Carbamidomethyl);C15(Carbamidomethyl)	4666.000	2992.24	2	1497.13	2789.2	-0.0388201	-12.9736	3.7893e-08	91	0.00498	0.001381	203.0794	HexNAc(1)	P02774_FASNCCSINSPPLYCDSEIDAELK_HexNAc(1)	File25372 Spectrum19904 scans: 25396
P02768	DLTKVHTECCHGDLLECADDRADLAK	C9(Carbamidomethyl);C10(Carbamidomethyl);C17(Carbamidomethyl)	3091.000	3536.56	3	1179.86	3041.36	0.0139983	3.95816	2.011e-05	91	0.01018	0.001381	494.1748	HexNAc(1)Neu5Ac(1)	P02768_DLTKVHTECCHGDLLECADDRADLAK_HexNAc(1)Neu5Ac(1)	File25372 Spectrum10390 scans: 15375
P02760	GCMGNGNNFVTEKECLQTCR	C2(Carbamidomethyl);N7(Deamidated);C15(Carbamidomethyl);C19(Carbamidomethyl)	3414.000	2740.1	3	914.374	2374.98	-0.00739922	-2.70035	4.8825e-07	90	0.02964	0.001381	365.1322	Hex(1)HexNAc(1)	P02760_GCMGNGNNFVTEKECLQTCR_Hex(1)HexNAc(1)	File25372 Spectrum12508 scans: 17630
P02768	AEVENDEMPADLPSLAADFVESK	N5(Deamidated);M8(Oxidation)	4741.000	2988.34	3	997.12	2493.11	0.0503208	16.839	4.5068e-06	90	0.01813	0.001381	494.1748	HexNAc(1)Neu5Ac(1)	P02768_AEVENDEMPADLPSLAADFVESK_HexNAc(1)Neu5Ac(1)	File25372 Spectrum20391 scans: 25908
P00738	LPECEADDGCPKPPEIAHGYVEHSVR	C4(Carbamidomethyl);C10(Carbamidomethyl)	3339.000	3456.57	3	1153.2	2961.34	0.0490611	14.1936	2.0305e-05	90	0.02937	0.001381	494.1748	HexNAc(1)Neu5Ac(1)	P00738_LPECEADDGCPKPPEIAHGYVEHSVR_HexNAc(1)Neu5Ac(1)	File25372 Spectrum12005 scans: 17102
P02768	KSHCIAEVENDEMPADLPSLAADFVESK	C4(Carbamidomethyl);N10(Deamidated);M13(Oxidation)	5009.000	3630.65	3	1211.22	3118.41	0.0428052	11.79	3.1668e-06	90	0.005167	0.001381	511.1901	Fuc(1)Hex(1)HexNAc(1)	P02768_KSHCIAEVENDEMPADLPSLAADFVESK_Fuc(1)Hex(1)HexNAc(1)	File25372 Spectrum21986 scans: 27582
P01599	LGLLLLWFPGARCDIQMTQSPSSLSASVGDR	C13(Carbamidomethyl);Q16(Deamidated);Q19(Deamidated)	2993.000	3871.82	3	1291.61	3376.68	-0.0418459	-10.8078	0.00019379	90	0.06189	0.002149	494.1748	HexNAc(1)Neu5Ac(1)	P01599_LGLLLLWFPGARCDIQMTQSPSSLSASVGDR_HexNAc(1)Neu5Ac(1)	File25372 Spectrum9724 scans: 14676
P01042	GCVHPISTQSPDLEPILR	C2(Carbamidomethyl)	4344.000	2674.26	3	892.426	2018.03	0.00366054	1.36881	1.252e-06	89	0.02987	0.001381	656.2276	Hex(1)HexNAc(1)Neu5Ac(1)	P01042_GCVHPISTQSPDLEPILR_Hex(1)HexNAc(1)Neu5Ac(1)	File25372 Spectrum18078 scans: 23479
Q14624	DPAVSRVMNMKIEETTMTTQTPAPIQAPSAILPLPGQSVER	N9(Deamidated);Q20(Deamidated);Q26(Deamidated)	4873.000	4814.27	4	1204.57	4407.2	-0.0930489	-19.3277	7.8541e-05	89	0.005743	0.001381	406.1587	HexNAc(2)	Q14624_DPAVSRVMNMKIEETTMTTQTPAPIQAPSAILPLPGQSVER_HexNAc(2)	File25372 Spectrum21185 scans: 26741
P02768	LLECADDRADLAKYICENQDSISSK	C4(Carbamidomethyl);C16(Carbamidomethyl)	2577.000	3408.47	2	1705.24	2913.35	-0.0530584	-15.5666	9.9062e-07	89	0.01876	0.001381	494.1748	HexNAc(1)Neu5Ac(1)	P02768_LLECADDRADLAKYICENQDSISSK_HexNAc(1)Neu5Ac(1)	File25372 Spectrum6994 scans: 11780
P02768	LLEKSHCIAEVENDEMPADLPSLAADFVESK	C7(Carbamidomethyl);N13(Deamidated);M16(Oxidation)	4722.000	4422	4	1106.51	3473.62	0.0544077	12.3039	1.3542e-05	87	0.01001	0.001381	947.3230	Hex(1)HexNAc(1)Neu5Ac(2)	P02768_LLEKSHCIAEVENDEMPADLPSLAADFVESK_Hex(1)HexNAc(1)Neu5Ac(2)	File25372 Spectrum20276 scans: 25787
P02671	AWTADSGEGDFLAEGGGVR		3785.000	2389.06	3	797.362	1893.85	0.0371821	15.5635	0.00092317	87	0.05394	0.002149	494.1748	HexNAc(1)Neu5Ac(1)	P02671_AWTADSGEGDFLAEGGGVR_HexNAc(1)Neu5Ac(1)	File25372 Spectrum14748 scans: 19982
O43866	DEDAGASCENPESSFSPVPEGVR	C8(Carbamidomethyl);N10(Deamidated)	3834.000	2948.19	3	983.737	2436	-0.00582575	-1.97604	7.4251e-05	86	0.01179	0.001381	511.1901	Fuc(1)Hex(1)HexNAc(1)	O43866_DEDAGASCENPESSFSPVPEGVR_Fuc(1)Hex(1)HexNAc(1)	File25372 Spectrum15064 scans: 20314
P02768	ENDEMPADLPSLAADFVESK	N2(Deamidated);M5(Oxidation)	4850.000	2601.15	2	1301.58	2193.96	0.0257181	9.8872	9.0673e-05	86	0.04797	0.002149	406.1587	HexNAc(2)	P02768_ENDEMPADLPSLAADFVESK_HexNAc(2)	File25372 Spectrum21049 scans: 26598
P00738	GNDVTDIADDGCPKPPEIAHGYVEHSVR	C12(Carbamidomethyl)	3348.000	3413.59	5	683.725	3047.4	0.0502368	14.7167	9.8485e-06	86	0.01122	0.001381	365.1322	Hex(1)HexNAc(1)	P00738_GNDVTDIADDGCPKPPEIAHGYVEHSVR_Hex(1)HexNAc(1)	File25372 Spectrum12066 scans: 17166
P24593	SKFVGGAENTAHPR		2086.000	2330.03	4	583.515	1469.74	-0.0180994	-7.76788	0.0063256	86	0.1912	0.003118	859.3070	Hex(1)HexNAc(2)Neu5Ac(1)	P24593_SKFVGGAENTAHPR_Hex(1)HexNAc(2)Neu5Ac(1)	File25372 Spectrum3822 scans: 8430
P01860	VTVPSSSLGTQTYTCNVNHKPSNTKVDK	Q11(Deamidated);C15(Carbamidomethyl);N16(Deamidated);N18(Deamidated)	1608.000	4888.15	5	978.636	3064.47	0.0349082	7.1414	0.00058818	85	0.09048	0.002149	1823.6453	Fuc(1)Hex(3)HexNAc(3)Neu5Ac(2)	P01860_VTVPSSSLGTQTYTCNVNHKPSNTKVDK_Fuc(1)Hex(3)HexNAc(3)Neu5Ac(2)	File25372 Spectrum863 scans: 5312
P01024	WGEKPNLSYIIGKDTWVEHWPEEDECQDEENQK	N6(Deamidated);C26(Carbamidomethyl)	4017.000	4746.05	5	950.217	4088.8	0.0165932	3.4962	4.863e-05	85	0.03281	0.001381	656.2276	Hex(1)HexNAc(1)Neu5Ac(1)	P01024_WGEKPNLSYIIGKDTWVEHWPEEDECQDEENQK_Hex(1)HexNAc(1)Neu5Ac(1)	File25372 Spectrum16130 scans: 21434
P98160	QLCPCYGDPAAGQAAHTCFLDTDGHPTCDACSPGHSGR	Q1(Deamidated);C3(Carbamidomethyl);C5(Carbamidomethyl);C18(Carbamidomethyl);C28(Carbamidomethyl);C31(Carbamidomethyl)	3685.000	4801.91	5	961.389	4144.66	0.0151478	3.15454	5.3605e-06	85	0.004698	0.001381	656.2276	Hex(1)HexNAc(1)Neu5Ac(1)	P98160_QLCPCYGDPAAGQAAHTCFLDTDGHPTCDACSPGHSGR_Hex(1)HexNAc(1)Neu5Ac(1)	File25372 Spectrum14120 scans: 19323
P01859	KNQVSLTCLVKGFYPSDISVEWESNGQPENNYK	N2(Deamidated);C8(Carbamidomethyl);N25(Deamidated);N30(Deamidated)	4735.000	4035.79	3	1346.27	3832.78	-0.0702306	-17.402	0.00055079	84	0.1704	0.003118	203.0794	HexNAc(1)	P01859_KNQVSLTCLVKGFYPSDISVEWESNGQPENNYK_HexNAc(1)	File25372 Spectrum20353 scans: 25868
P01009	SLAEDPQGDAAQKTDTSHHDQDHPTFNK		1668.000	3583.49	3	1195.5	3089.37	-0.0557273	-15.5511	8.999e-06	84	0.02749	0.001381	494.1748	HexNAc(1)Neu5Ac(1)	P01009_SLAEDPQGDAAQKTDTSHHDQDHPTFNK_HexNAc(1)Neu5Ac(1)	File25372 Spectrum1255 scans: 5724
P02768	TDLTKVHTECCHGDLLECADDRADLAK	C10(Carbamidomethyl);C11(Carbamidomethyl);C18(Carbamidomethyl)	3136.000	4001.68	4	1001.43	3142.41	-0.0418881	-10.4676	7.4728e-05	83	0.1014	0.002149	859.3070	Hex(1)HexNAc(2)Neu5Ac(1)	P02768_TDLTKVHTECCHGDLLECADDRADLAK_Hex(1)HexNAc(2)Neu5Ac(1)	File25372 Spectrum10664 scans: 15685
P01859::P01857	WQQGNVFSCSVMHEALHNHYTQK	Q2(Deamidated);Q3(Deamidated);C9(Carbamidomethyl);N18(Deamidated)	2481.000	3315.43	3	1106.15	2803.21	0.0212182	6.39985	5.0715e-06	81	0.03466	0.001381	511.1901	Fuc(1)Hex(1)HexNAc(1)	P01859::P01857_WQQGNVFSCSVMHEALHNHYTQK_Fuc(1)Hex(1)HexNAc(1)	File25372 Spectrum6388 scans: 11128
P07357	GTICSGDIWDQASCSSSTTCVR	C4(Carbamidomethyl);C14(Carbamidomethyl);C20(Carbamidomethyl)	4528.000	2651.1	3	884.708	2447.02	0.00594419	2.24216	2.7806e-05	81	0.0133	0.001381	203.0794	HexNAc(1)	P07357_GTICSGDIWDQASCSSSTTCVR_HexNAc(1)	File25372 Spectrum19107 scans: 24559
P04114	RKGNVATEISTER		2362.000	1954.97	3	652.663	1459.77	0.0142976	7.31349	0.00014268	81	0.122	0.002149	494.1748	HexNAc(1)Neu5Ac(1)	P04114_RKGNVATEISTER_HexNAc(1)Neu5Ac(1)	File25372 Spectrum5604 scans: 10301
P01861	WQEGNVFSCSVMHEALHNHYTQK	Q2(Deamidated);C9(Carbamidomethyl);N18(Deamidated)	2481.000	3315.43	3	1106.15	2803.21	0.0212182	6.39985	5.0715e-06	81	0.03466	0.001381	511.1901	Fuc(1)Hex(1)HexNAc(1)	P01861_WQEGNVFSCSVMHEALHNHYTQK_Fuc(1)Hex(1)HexNAc(1)	File25372 Spectrum6388 scans: 11128
P02790	IATPLPPTSAHGNVAEGETKPDPDVTER	N13(Deamidated)	2975.000	3393.53	4	849.39	2899.42	-0.0654514	-19.2871	0.0073513	80	0.1655	0.003118	494.1748	HexNAc(1)Neu5Ac(1)	P02790_IATPLPPTSAHGNVAEGETKPDPDVTER_HexNAc(1)Neu5Ac(1)	File25372 Spectrum9601 scans: 14547
P01871	TNISESHPNATFSAVGEASICEDDWNSGER	C21(Carbamidomethyl)	4210.000	4227.78	4	1057.95	3279.4	0.0563481	13.328	0.00044622	80	0.05259	0.002149	947.3230	Hex(1)HexNAc(1)Neu5Ac(2)	P01871_TNISESHPNATFSAVGEASICEDDWNSGER_Hex(1)HexNAc(1)Neu5Ac(2)	File25372 Spectrum17310 scans: 22673
P01871	GQSMFTCRVDHRGLTFQQNASSMCVPDQDTAIR	C7(Carbamidomethyl);N19(Deamidated);C24(Carbamidomethyl)	4475.000	4674.05	4	1169.52	3813.71	0.0278445	5.95725	0.0012679	80	0.05029	0.002149	859.3070	Hex(1)HexNAc(2)Neu5Ac(1)	P01871_GQSMFTCRVDHRGLTFQQNASSMCVPDQDTAIR_Hex(1)HexNAc(2)Neu5Ac(1)	File25372 Spectrum18807 scans: 24244
Q16610	ELPSLQHPNEQKEGTPAPFGDQSHPEPESW		4314.000	4314.85	3	1439.29	3367.54	-0.0114926	-2.6635	8.5363e-05	79	0.257	0.009773	947.3230	Hex(1)HexNAc(1)Neu5Ac(2)	Q16610_ELPSLQHPNEQKEGTPAPFGDQSHPEPESW_Hex(1)HexNAc(1)Neu5Ac(2)	File25372 Spectrum17909 scans: 23301
P50552	VTTSETQPCTPSSSDYSDLQR	C9(Carbamidomethyl)	3265.000	2724.17	3	909.064	2358.03	0.00785344	2.88287	1.6806e-05	79	0.03549	0.001381	365.1322	Hex(1)HexNAc(1)	P50552_VTTSETQPCTPSSSDYSDLQR_Hex(1)HexNAc(1)	File25372 Spectrum11510 scans: 16582
P02768	AAFTECCQAADK	C6(Carbamidomethyl);C7(Carbamidomethyl)	2926.000	1881.77	2	941.893	1370.56	0.0222616	11.8301	0.00044336	79	0.1452	0.002149	511.1901	Fuc(1)Hex(1)HexNAc(1)	P02768_AAFTECCQAADK_Fuc(1)Hex(1)HexNAc(1)	File25372 Spectrum9287 scans: 14217
P01857::P01860	CNVNHKPSNTK	C1(Carbamidomethyl);N4(Deamidated);N9(Deamidated)	1707.000	1664.75	3	555.923	1299.59	0.0263215	15.8111	0.0008764	78	0.1666	0.003118	365.1322	Hex(1)HexNAc(1)	P01857::P01860_CNVNHKPSNTK_Hex(1)HexNAc(1)	File25372 Spectrum1481 scans: 5963
P01861	TKTYTCNVDHKPSNTK	C6(Carbamidomethyl)	2361.000	2096.96	3	699.992	1892.91	-0.0316586	-15.0974	0.00072358	78	0.238	0.005945	203.0794	HexNAc(1)	P01861_TKTYTCNVDHKPSNTK_HexNAc(1)	File25372 Spectrum5600 scans: 10297
P01860	TQTYTCNVNHKPSNTK	C6(Carbamidomethyl);N9(Deamidated)	2361.000	2096.96	3	699.992	1892.87	0.00472688	2.25417	0.00072358	78	0.1493	0.002149	203.0794	HexNAc(1)	P01860_TQTYTCNVNHKPSNTK_HexNAc(1)	File25372 Spectrum5600 scans: 10297
P01859	TQTYTCNVDHKPSNTK	C6(Carbamidomethyl)	2361.000	2096.96	3	699.992	1892.87	0.00472688	2.25417	0.00072358	78	0.1493	0.002149	203.0794	HexNAc(1)	P01859_TQTYTCNVDHKPSNTK_HexNAc(1)	File25372 Spectrum5600 scans: 10297
P15814	NSVTHVFGSGTQLTVLSQPKATPSVTLFPPSSEELQANK	Q12(Deamidated)	4623.000	4503.18	3	1502.07	4097.1	-0.0755344	-16.7736	9.7778e-05	78	0.02653	0.001381	406.1587	HexNAc(2)	P15814_NSVTHVFGSGTQLTVLSQPKATPSVTLFPPSSEELQANK_HexNAc(2)	File25372 Spectrum19635 scans: 25114
P02768	EVENDEMPADLPSLAADFVESK	M7(Oxidation)	4742.000	3281.39	3	1094.8	2421.09	-0.00994983	-3.0322	0.16308	77	0.2453	0.009773	859.3070	Hex(1)HexNAc(2)Neu5Ac(1)	P02768_EVENDEMPADLPSLAADFVESK_Hex(1)HexNAc(2)Neu5Ac(1)	File25372 Spectrum20400 scans: 25917
P02774	QEFPTYVEPTNDEICEAFR	C15(Carbamidomethyl)	4683.000	2750.21	3	917.744	2344.03	0.0199933	7.26974	0.00019527	77	0.04974	0.002149	406.1587	HexNAc(2)	P02774_QEFPTYVEPTNDEICEAFR_HexNAc(2)	File25372 Spectrum20022 scans: 25520
P02671	STGSWNSGSSGTGSTGNQNPGSPRPGSTGTWNPGSSER		3262.000	4204.84	3	1402.62	3692.61	0.038003	9.03793	7.275e-05	77	0.01633	0.001381	511.1901	Fuc(1)Hex(1)HexNAc(1)	P02671_STGSWNSGSSGTGSTGNQNPGSPRPGSTGTWNPGSSER_Fuc(1)Hex(1)HexNAc(1)	File25372 Spectrum11490 scans: 16561
P02768	FEDHVKLVNEVTEFAKTCVADESAENCDK	N9(Deamidated);C18(Carbamidomethyl);C27(Carbamidomethyl)	3430.000	3749.63	3	1250.88	3384.51	-0.0149311	-3.98202	0.00029277	77	0.07482	0.002149	365.1322	Hex(1)HexNAc(1)	P02768_FEDHVKLVNEVTEFAKTCVADESAENCDK_Hex(1)HexNAc(1)	File25372 Spectrum12621 scans: 17749
A0A0C4DH72	LLWLPGARCAIQMTQSPSSLSASVGDR	C9(Carbamidomethyl);Q12(Deamidated);Q15(Deamidated)	3346.000	3762.75	4	941.696	2902.43	0.0117126	3.11276	0.011977	77	0.05975	0.002149	859.3070	Hex(1)HexNAc(2)Neu5Ac(1)	A0A0C4DH72_LLWLPGARCAIQMTQSPSSLSASVGDR_Hex(1)HexNAc(2)Neu5Ac(1)	File25372 Spectrum12045 scans: 17144
P01599::P01601	PGARCDIQMTQSPSSLSASVGDR	C5(Carbamidomethyl);M9(Oxidation)	3558.000	2842.32	3	948.447	2435.12	0.0394813	13.8905	9.7164e-05	76	0.03136	0.001381	406.1587	HexNAc(2)	P01599::P01601_PGARCDIQMTQSPSSLSASVGDR_HexNAc(2)	File25372 Spectrum13411 scans: 18579
P02768	KSHCIAEVENDEMPADLPSLAADFVESK	C4(Carbamidomethyl);M13(Oxidation)	4743.000	4941.08	3	1648.03	3117.43	0.00388948	0.787172	0.00070289	76	0.08092	0.002149	1823.6453	Fuc(1)Hex(3)HexNAc(3)Neu5Ac(2)	P02768_KSHCIAEVENDEMPADLPSLAADFVESK_Fuc(1)Hex(3)HexNAc(3)Neu5Ac(2)	File25372 Spectrum20406 scans: 25923
Q14624	VSRVMNMKIEETTMTTQTPAPIQAPSAILPLPGQSVER	N6(Deamidated);Q17(Deamidated);Q23(Deamidated)	4870.000	4780.24	4	1196.07	4124.08	-0.0762596	-15.9531	0.0007893	76	0.04325	0.002149	656.2276	Hex(1)HexNAc(1)Neu5Ac(1)	Q14624_VSRVMNMKIEETTMTTQTPAPIQAPSAILPLPGQSVER_Hex(1)HexNAc(1)Neu5Ac(1)	File25372 Spectrum21169 scans: 26724
P00738	VDSGNDVTDIADDGCPKPPEIAHGYVEHSVR	C15(Carbamidomethyl)	3701.000	3754.69	4	939.68	3348.53	0.000896494	0.238766	8.5867e-05	76	0.01613	0.001381	406.1587	HexNAc(2)	P00738_VDSGNDVTDIADDGCPKPPEIAHGYVEHSVR_HexNAc(2)	File25372 Spectrum14211 scans: 19419
P00747	EFLNGRVQSTELCAGHLAGGTDSCQGDSGGPLVCFEK	C34(Carbamidomethyl);C13(Carbamidomethyl);C24(Carbamidomethyl)	4292.000	4317.88	4	1080.48	3952.78	-0.0343406	-7.95313	0.0007466	75	0.02717	0.001381	365.1322	Hex(1)HexNAc(1)	P00747_EFLNGRVQSTELCAGHLAGGTDSCQGDSGGPLVCFEK_Hex(1)HexNAc(1)	File25372 Spectrum17790 scans: 23177
A0A0C4DH73	LLLLWFPGSRCDIQMTQSPSSVSASVGDR	C11(Carbamidomethyl);Q14(Deamidated);M15(Oxidation);Q17(Deamidated)	2914.000	3735.68	4	934.928	3224.55	-0.0574052	-15.3667	0.0027911	75	0.2455	0.009773	511.1901	Fuc(1)Hex(1)HexNAc(1)	A0A0C4DH73_LLLLWFPGSRCDIQMTQSPSSVSASVGDR_Fuc(1)Hex(1)HexNAc(1)	File25372 Spectrum9199 scans: 14125
P05452	ITAQPDGGKTENCAVLSGAANGK	Q4(Deamidated);C13(Carbamidomethyl);N21(Deamidated)	4059.000	2917.33	4	730.341	2260.06	0.0382854	13.1234	0.0078748	75	0.1263	0.002149	656.2276	Hex(1)HexNAc(1)Neu5Ac(1)	P05452_ITAQPDGGKTENCAVLSGAANGK_Hex(1)HexNAc(1)Neu5Ac(1)	File25372 Spectrum16382 scans: 21698
P02768	YICENQDSISSK	C3(Carbamidomethyl);Q6(Deamidated)	2701.000	1809.78	2	905.896	1443.62	0.0234039	12.9319	0.00081308	74	0.1215	0.002149	365.1322	Hex(1)HexNAc(1)	P02768_YICENQDSISSK_Hex(1)HexNAc(1)	File25372 Spectrum7804 scans: 12642
P02787	CMGSGLNLCEPNNK	C1(Carbamidomethyl);M2(Oxidation);N7(Deamidated);C9(Carbamidomethyl)	4026.000	2558.02	3	853.68	1609.65	0.0385397	15.0662	0.0061792	73	0.1059	0.002149	947.3230	Hex(1)HexNAc(1)Neu5Ac(2)	P02787_CMGSGLNLCEPNNK_Hex(1)HexNAc(1)Neu5Ac(2)	File25372 Spectrum16178 scans: 21484
P01857::P01860	CNVNHKPSNTKVDK	C1(Carbamidomethyl);N2(Deamidated)	2189.000	1844.86	2	923.439	1640.79	-0.0124751	-6.76207	6.7213e-05	73	0.03133	0.001381	203.0794	HexNAc(1)	P01857::P01860_CNVNHKPSNTKVDK_HexNAc(1)	File25372 Spectrum4482 scans: 9123
P07996	DGDGRGDACKDDFDHDSVPDIDDICPENVDISETDFR	C9(Carbamidomethyl);C25(Carbamidomethyl)	4609.000	4413.8	4	1104.46	4210.72	-0.00451007	-1.02181	0.0043021	72	0.05312	0.002149	203.0794	HexNAc(1)	P07996_DGDGRGDACKDDFDHDSVPDIDDICPENVDISETDFR_HexNAc(1)	File25372 Spectrum19556 scans: 25031
P05543	IQHAYSENADFSGLTEDNGLK	N18(Deamidated)	4016.000	2513.11	3	838.71	2309.04	-0.0188829	-7.51375	0.001654	71	0.05822	0.002149	203.0794	HexNAc(1)	P05543_IQHAYSENADFSGLTEDNGLK_HexNAc(1)	File25372 Spectrum16124 scans: 21427
P04004	PEDEYTVYDDGEEKNNATVHEQVGGPSLTSDLQAQSK	N16(Deamidated);Q22(Deamidated)	4574.000	4912.13	4	1229.04	4051.79	0.0291723	5.93882	0.059153	71	0.06155	0.002149	859.3070	Hex(1)HexNAc(2)Neu5Ac(1)	P04004_PEDEYTVYDDGEEKNNATVHEQVGGPSLTSDLQAQSK_Hex(1)HexNAc(2)Neu5Ac(1)	File25372 Spectrum19361 scans: 24826
P02768	LVNEVTEFAKTCVADESAENCDK	N3(Deamidated);C12(Carbamidomethyl);C21(Carbamidomethyl)	1954.000	3124.29	4	782.08	2629.15	-0.0407373	-13.0389	0.00026403	71	0.1479	0.002149	494.1748	HexNAc(1)Neu5Ac(1)	P02768_LVNEVTEFAKTCVADESAENCDK_HexNAc(1)Neu5Ac(1)	File25372 Spectrum3004 scans: 7571
P19827	SLDEATNLNGGLLR	N9(Deamidated)	4750.000	1676.84	2	839.428	1472.75	0.0114919	6.85329	0.0029927	70	0.0516	0.002149	203.0794	HexNAc(1)	P19827_SLDEATNLNGGLLR_HexNAc(1)	File25372 Spectrum20447 scans: 25966
A0A0C4DH73	LLLWFPGSRCDIQMTQSPSSVSASVGDR	C10(Carbamidomethyl);Q13(Deamidated);M14(Oxidation)	2660.000	4058.86	3	1353.96	3110.48	0.0521822	12.8564	0.082487	69	0.2145	0.004975	947.3230	Hex(1)HexNAc(1)Neu5Ac(2)	A0A0C4DH73_LLLWFPGSRCDIQMTQSPSSVSASVGDR_Hex(1)HexNAc(1)Neu5Ac(2)	File25372 Spectrum7529 scans: 12353
P01024	TPGSGKDYAGVFSDAGLTFTSSSGQQTAQR		4598.000	3532.59	5	707.525	3020.41	-0.0145227	-4.11107	0.086346	69	0.1587	0.002149	511.1901	Fuc(1)Hex(1)HexNAc(1)	P01024_TPGSGKDYAGVFSDAGLTFTSSSGQQTAQR_Fuc(1)Hex(1)HexNAc(1)	File25372 Spectrum19498 scans: 24970
P00450	EKKLISVDTEHSNIYLQNGPDR	N18(Deamidated)	3677.000	3067.48	4	767.876	2556.28	0.00439872	1.43399	0.00072703	69	0.2186	0.004975	511.1901	Fuc(1)Hex(1)HexNAc(1)	P00450_EKKLISVDTEHSNIYLQNGPDR_Fuc(1)Hex(1)HexNAc(1)	File25372 Spectrum14072 scans: 19273
P00742	TNEFWNKYKDGDQCETSPCQNQGK	N2(Deamidated);N6(Deamidated);C14(Carbamidomethyl);C19(Carbamidomethyl)	1674.000	3795.59	3	1266.2	2935.2	0.0727011	19.1541	0.0013775	68	0.2153	0.004975	859.3070	Hex(1)HexNAc(2)Neu5Ac(1)	P00742_TNEFWNKYKDGDQCETSPCQNQGK_Hex(1)HexNAc(2)Neu5Ac(1)	File25372 Spectrum1288 scans: 5760
Q86VH4	FKGNKESTMICAGPK	N4(Deamidated);M9(Oxidation);C11(Carbamidomethyl)	3640.000	2195.99	2	1099	1683.8	-0.00314895	-1.43396	0.11657	67	0.2128	0.004975	511.1901	Fuc(1)Hex(1)HexNAc(1)	Q86VH4_FKGNKESTMICAGPK_Fuc(1)Hex(1)HexNAc(1)	File25372 Spectrum13868 scans: 19058
P02671	SPGSGNARPNNPDWGTFEEVSGNVSPGTR	N6(Deamidated);N10(Deamidated);N11(Deamidated)	4043.000	3354.51	3	1119.18	2988.31	0.063116	18.8153	0.001523	67	0.09655	0.002149	365.1322	Hex(1)HexNAc(1)	P02671_SPGSGNARPNNPDWGTFEEVSGNVSPGTR_Hex(1)HexNAc(1)	File25372 Spectrum16285 scans: 21596
P01871	AATSQVLLPSKDVMQGTDEHVVCK	Q5(Deamidated);M14(Oxidation);C23(Carbamidomethyl)	3157.000	2832.38	5	567.484	2629.27	0.031465	11.109	0.004141	67	0.1999	0.004975	203.0794	HexNAc(1)	P01871_AATSQVLLPSKDVMQGTDEHVVCK_HexNAc(1)	File25372 Spectrum10810 scans: 15839
P02671	GSGNARPNNPDWGTFEEVSGNVSPGTR		4043.000	3004.3	3	1002.44	2801.28	-0.0559763	-18.6321	7.8594e-06	67	0.03177	0.001381	203.0794	HexNAc(1)	P02671_GSGNARPNNPDWGTFEEVSGNVSPGTR_HexNAc(1)	File25372 Spectrum16284 scans: 21595
P02768	CIAEVENDEMPADLPSLAADFVESK	C1(Carbamidomethyl);N7(Deamidated)	4852.000	3157.43	3	1053.48	2750.23	0.0368232	11.6624	0.0044598	67	0.07017	0.002149	406.1587	HexNAc(2)	P02768_CIAEVENDEMPADLPSLAADFVESK_HexNAc(2)	File25372 Spectrum21063 scans: 26613
B9A064	QVTHEGSTVEK	Q1(Deamidated)	2132.000	1726.75	2	864.381	1214.58	-0.0236175	-13.6775	0.0066824	65	0.1643	0.003118	511.1901	Fuc(1)Hex(1)HexNAc(1)	B9A064_QVTHEGSTVEK_Fuc(1)Hex(1)HexNAc(1)	File25372 Spectrum4113 scans: 8736
P00738	CPKPPEIAHGYVEHSVR	C1(Carbamidomethyl)	3770.000	2382.13	3	795.05	1974.97	-0.00681293	-2.86002	0.020887	65	0.2116	0.004975	406.1587	HexNAc(2)	P00738_CPKPPEIAHGYVEHSVR_HexNAc(2)	File25372 Spectrum14656 scans: 19886
P00748	GGTCVNMPSGPHCLCPQHLTGNHCQK	C4(Carbamidomethyl);C13(Carbamidomethyl);C15(Carbamidomethyl);C24(Carbamidomethyl)	2263.000	3149.34	6	525.897	2946.26	0.000716543	0.227522	0.00075235	65	0.09185	0.002149	203.0794	HexNAc(1)	P00748_GGTCVNMPSGPHCLCPQHLTGNHCQK_HexNAc(1)	File25372 Spectrum4960 scans: 9625
P01023	DASDCHGEDSQAFCEK	C5(Carbamidomethyl);C14(Carbamidomethyl)	2602.000	2260.87	3	754.629	1854.68	0.0285795	12.641	0.010279	64	0.2177	0.004975	406.1587	HexNAc(2)	P01023_DASDCHGEDSQAFCEK_HexNAc(2)	File25372 Spectrum7156 scans: 11950
P02787	CDEWSVNSVGKIECVSAETTEDCIAK	C1(Carbamidomethyl);N7(Deamidated);C14(Carbamidomethyl);C23(Carbamidomethyl)	3169.000	3481.51	4	871.384	2987.28	0.0486408	13.9712	0.020585	64	0.2304	0.004975	494.1748	HexNAc(1)Neu5Ac(1)	P02787_CDEWSVNSVGKIECVSAETTEDCIAK_HexNAc(1)Neu5Ac(1)	File25372 Spectrum10892 scans: 15925
P02760	AGPVPTPPDNIQVQENFNISR	N10(Deamidated);Q12(Deamidated);N18(Deamidated)	4656.000	2952.38	3	985.136	2295.1	0.0525962	17.8148	0.011564	63	0.2217	0.004975	656.2276	Hex(1)HexNAc(1)Neu5Ac(1)	P02760_AGPVPTPPDNIQVQENFNISR_Hex(1)HexNAc(1)Neu5Ac(1)	File25372 Spectrum19829 scans: 25317
P00738	TDIADDGCPKPPEIAHGYVEHSVR	C8(Carbamidomethyl)	3694.000	3319.51	5	664.91	2662.24	0.037085	11.1718	0.028075	63	0.09111	0.002149	656.2276	Hex(1)HexNAc(1)Neu5Ac(1)	P00738_TDIADDGCPKPPEIAHGYVEHSVR_Hex(1)HexNAc(1)Neu5Ac(1)	File25372 Spectrum14169 scans: 19374
P01857::P01860	CNVNHKPSNTK	C1(Carbamidomethyl);N2(Deamidated)	1998.000	1502.67	2	752.342	1298.6	-0.0155551	-10.3516	0.0031548	63	0.126	0.002149	203.0794	HexNAc(1)	P01857::P01860_CNVNHKPSNTK_HexNAc(1)	File25372 Spectrum3280 scans: 7861
P07996	STSCGNGIQQR	C4(Carbamidomethyl);N6(Deamidated)	1913.000	1863.75	2	932.881	1207.53	-0.00490179	-2.63007	0.034845	63	0.1794	0.003118	656.2276	Hex(1)HexNAc(1)Neu5Ac(1)	P07996_STSCGNGIQQR_Hex(1)HexNAc(1)Neu5Ac(1)	File25372 Spectrum2738 scans: 7283
P02671	AGSWNSGSSGPGSTGNR		2508.000	1984.82	2	993.418	1577.68	-0.0225821	-11.3774	0.0075932	62	0.1279	0.002149	406.1587	HexNAc(2)	P02671_AGSWNSGSSGPGSTGNR_HexNAc(2)	File25372 Spectrum6553 scans: 11307
P02768	EKPLLEKSHCIAEVENDEMPADLPSLAADFVESK	C10(Carbamidomethyl)	4816.000	4305.95	4	1077.49	3810.83	-0.0655821	-15.2306	0.025934	62	0.1912	0.003118	494.1748	HexNAc(1)Neu5Ac(1)	P02768_EKPLLEKSHCIAEVENDEMPADLPSLAADFVESK_HexNAc(1)Neu5Ac(1)	File25372 Spectrum20848 scans: 26387
P02671	DSGEGDFLAEGGGVR		4191.000	1830.81	2	916.41	1464.65	0.0220776	12.059	0.012941	62	0.08664	0.002149	365.1322	Hex(1)HexNAc(1)	P02671_DSGEGDFLAEGGGVR_Hex(1)HexNAc(1)	File25372 Spectrum17191 scans: 22548
P02768	ECCHGDLLECADDRADLAKYICENQDSISSK	C2(Carbamidomethyl);C3(Carbamidomethyl);C10(Carbamidomethyl);C22(Carbamidomethyl)	4177.000	4183.81	4	1046.96	3671.56	0.0614804	14.6948	0.070456	62	0.1451	0.002149	511.1901	Fuc(1)Hex(1)HexNAc(1)	P02768_ECCHGDLLECADDRADLAKYICENQDSISSK_Fuc(1)Hex(1)HexNAc(1)	File25372 Spectrum17102 scans: 22454
P01009	QDHPTFNK		1671.000	1844.76	2	923.386	985.462	-0.0120968	-6.55742	0.37334	60	0.1768	0.003118	859.3070	Hex(1)HexNAc(2)Neu5Ac(1)	P01009_QDHPTFNK_Hex(1)HexNAc(2)Neu5Ac(1)	File25372 Spectrum1270 scans: 5741
P02679	QLEAQCQEPCKDTVQIHDITGKDCQDIANK	C6(Carbamidomethyl);C10(Carbamidomethyl);C24(Carbamidomethyl)	3371.000	3744.72	4	937.187	3541.62	0.0159282	4.25351	0.020557	59	0.1402	0.002149	203.0794	HexNAc(1)	P02679_QLEAQCQEPCKDTVQIHDITGKDCQDIANK_HexNAc(1)	File25372 Spectrum12224 scans: 17332
P02679	EASILTHDSSIRYLQEIYNSNNQK		3203.000	3026.45	3	1009.83	2822.38	-0.0107984	-3.56802	0.011922	57	0.05505	0.002149	203.0794	HexNAc(1)	P02679_EASILTHDSSIRYLQEIYNSNNQK_HexNAc(1)	File25372 Spectrum11121 scans: 16165
P02656	VQESQVAQQAR		3406.000	1737.83	2	869.92	1242.63	0.0169156	9.73377	0.011399	57	0.254	0.009773	494.1748	HexNAc(1)Neu5Ac(1)	P02656_VQESQVAQQAR_HexNAc(1)Neu5Ac(1)	File25372 Spectrum12455 scans: 17575
P01009	CLVPVSLAEDPQGDAAQKTDTSHHDQDHPTFNK	C1(Carbamidomethyl);Q12(Deamidated);Q17(Deamidated);Q26(Deamidated)	1963.000	4317.79	4	1080.45	3660.63	-0.0722231	-16.7269	0.13719	57	0.2461	0.009773	656.2276	Hex(1)HexNAc(1)Neu5Ac(1)	P01009_CLVPVSLAEDPQGDAAQKTDTSHHDQDHPTFNK_Hex(1)HexNAc(1)Neu5Ac(1)	File25372 Spectrum3060 scans: 7630
O60840	FIYAVIGMQMFGKVALQDGTQINR	M10(Oxidation);Q17(Deamidated);N23(Deamidated)	3338.000	3373.58	6	563.271	2717.36	-0.0033532	-0.993959	0.89088	56	0.2512	0.009773	656.2276	Hex(1)HexNAc(1)Neu5Ac(1)	O60840_FIYAVIGMQMFGKVALQDGTQINR_Hex(1)HexNAc(1)Neu5Ac(1)	File25372 Spectrum12000 scans: 17097
P04114	AESSSGVPGTADSR		2638.000	1726.75	2	864.381	1319.6	-0.00985851	-5.7093	0.17	55	0.2476	0.009773	406.1587	HexNAc(2)	P04114_AESSSGVPGTADSR_HexNAc(2)	File25372 Spectrum7406 scans: 12213
P01876	PTPSPSTPPTPSPSCCHPR	C15(Carbamidomethyl);C16(Carbamidomethyl)	3453.000	2262.98	2	1132.5	2058.93	-0.0233657	-10.3252	0.047068	55	0.2147	0.004975	203.0794	HexNAc(1)	P01876_PTPSPSTPPTPSPSCCHPR_HexNAc(1)	File25372 Spectrum12771 scans: 17907
P02768	LECADDRADLAKYICENQDSISSK	C3(Carbamidomethyl);C15(Carbamidomethyl)	2586.000	3003.35	3	1002.13	2800.26	0.0105977	3.52863	0.0020306	53	0.1623	0.003118	203.0794	HexNAc(1)	P02768_LECADDRADLAKYICENQDSISSK_HexNAc(1)	File25372 Spectrum7051 scans: 11840
P07357	CNGDQDCLDGSDEDDCEDVR	C1(Carbamidomethyl);C7(Carbamidomethyl);C16(Carbamidomethyl)	2985.000	2738.99	3	914.005	2372.81	0.0514551	18.7861	0.0055785	53	0.1225	0.002149	365.1322	Hex(1)HexNAc(1)	P07357_CNGDQDCLDGSDEDDCEDVR_Hex(1)HexNAc(1)	File25372 Spectrum9671 scans: 14620
P01859	NQVSLTCLVKGFYPSDISVEWESNGQPENNYK	N1(Deamidated);Q2(Deamidated);C7(Carbamidomethyl);N24(Deamidated)	4690.000	4361.98	5	873.403	3704.68	0.0643108	14.7435	0.18847	52	0.2357	0.004975	656.2276	Hex(1)HexNAc(1)Neu5Ac(1)	P01859_NQVSLTCLVKGFYPSDISVEWESNGQPENNYK_Hex(1)HexNAc(1)Neu5Ac(1)	File25372 Spectrum20062 scans: 25562
P01699	PPSASGTPGQR		1852.000	1256.61	2	629.314	1053.52	0.0137256	10.9227	0.0082796	50	0.2191	0.004975	203.0794	HexNAc(1)	P01699_PPSASGTPGQR_HexNAc(1)	File25372 Spectrum2364 scans: 6890
Q9UPU7	KDLSSQK	Q6(Deamidated)	1742.000	1300.59	3	434.537	805.418	-0.0075458	-5.80184	0.0043438	50	0.2002	0.004975	494.1748	HexNAc(1)Neu5Ac(1)	Q9UPU7_KDLSSQK_HexNAc(1)Neu5Ac(1)	File25372 Spectrum1696 scans: 6189
P08519	VTESSVLATSTAVSEQAPTEQSPTVQDCYHGDGQSYR	Q16(Deamidated);Q21(Deamidated);C28(Carbamidomethyl)	4578.000	4847.17	4	1212.8	3986.76	0.0962465	19.8562	2.3681	50	0.2526	0.009773	859.3070	Hex(1)HexNAc(2)Neu5Ac(1)	P08519_VTESSVLATSTAVSEQAPTEQSPTVQDCYHGDGQSYR_Hex(1)HexNAc(2)Neu5Ac(1)	File25372 Spectrum19383 scans: 24849
P02768	TECCHGDLLECADDRADLAKYICENQDSISSK	C3(Carbamidomethyl);C4(Carbamidomethyl);C11(Carbamidomethyl);C23(Carbamidomethyl)	4352.000	4179.79	5	836.965	3772.61	0.0187255	4.48	0.33466	49	0.1214	0.002149	406.1587	HexNAc(2)	P02768_TECCHGDLLECADDRADLAKYICENQDSISSK_HexNAc(2)	File25372 Spectrum18126 scans: 23529
Q86WB7	LTMVAYGLVECVESKNPIRPHAPGQVNQAEDEEIQTK	M3(Oxidation);Q35(Deamidated);C11(Carbamidomethyl);N27(Deamidated)	4260.000	4663.19	4	1166.81	4168.01	0.00715097	1.53349	5.0641	48	0.205	0.004975	494.1748	HexNAc(1)Neu5Ac(1)	Q86WB7_LTMVAYGLVECVESKNPIRPHAPGQVNQAEDEEIQTK_HexNAc(1)Neu5Ac(1)	File25372 Spectrum17605 scans: 22982
Q92496	GNSSGSITCLQNGWSTQPICIKFCDMPVFENSRAK	N2(Deamidated);C9(Carbamidomethyl);Q11(Deamidated);C20(Carbamidomethyl);C24(Carbamidomethyl);N31(Deamidated)	3076.000	4852.19	7	694.177	3991.78	0.0912021	18.7961	0.092706	48	0.01794	0.001381	859.3070	Hex(1)HexNAc(2)Neu5Ac(1)	Q92496_GNSSGSITCLQNGWSTQPICIKFCDMPVFENSRAK_Hex(1)HexNAc(2)Neu5Ac(1)	File25372 Spectrum10277 scans: 15257
P02671	FRPDSPGSGNARPNNPDWGTFEEVSGNVSPGTR	N10(Deamidated);N14(Deamidated);N15(Deamidated)	3987.000	4015.73	4	1004.94	3503.56	-0.0234924	-5.85009	0.17786	47	0.236	0.004975	511.1901	Fuc(1)Hex(1)HexNAc(1)	P02671_FRPDSPGSGNARPNNPDWGTFEEVSGNVSPGTR_Fuc(1)Hex(1)HexNAc(1)	File25372 Spectrum15963 scans: 21258
P02671	SGSSGTGSTGNQNPGSPRPGSTGTWNPGSSER		2814.000	3717.59	3	1240.2	3060.35	0.00584254	1.57159	0.37114	45	0.1182	0.002149	656.2276	Hex(1)HexNAc(1)Neu5Ac(1)	P02671_SGSSGTGSTGNQNPGSPRPGSTGTWNPGSSER_Hex(1)HexNAc(1)Neu5Ac(1)	File25372 Spectrum8534 scans: 13425
Q8IUN9	VGFQNSK	N5(Deamidated)	2689.000	2604.07	2	1303.04	779.381	0.0401101	15.4029	0.97553	45	0.2303	0.004975	1823.6453	Fuc(1)Hex(3)HexNAc(3)Neu5Ac(2)	Q8IUN9_VGFQNSK_Fuc(1)Hex(3)HexNAc(3)Neu5Ac(2)	File25372 Spectrum7727 scans: 12561
Q9UGI0	SGSSDVGR		2129.000	1419.59	3	474.205	763.346	0.0189251	13.3314	0.33288	44	0.238	0.005945	656.2276	Hex(1)HexNAc(1)Neu5Ac(1)	Q9UGI0_SGSSDVGR_Hex(1)HexNAc(1)Neu5Ac(1)	File25372 Spectrum4098 scans: 8720
A6NFN3	AVVYQDGFYGAEIYGGYAAYRYAQPAAAAAAYSDSYGR	Q5(Deamidated);Q24(Deamidated)	4374.000	4705.06	5	942.019	4047.82	0.00687147	1.46044	0.79149	44	0.13	0.002149	656.2276	Hex(1)HexNAc(1)Neu5Ac(1)	A6NFN3_AVVYQDGFYGAEIYGGYAAYRYAQPAAAAAAYSDSYGR_Hex(1)HexNAc(1)Neu5Ac(1)	File25372 Spectrum18245 scans: 23654
P02768	RPEVDVMCTAFHDNEETFLKK	C8(Carbamidomethyl)	4097.000	2768.33	4	693.089	2565.2	0.0475004	17.1585	0.018288	44	0.231	0.004975	203.0794	HexNAc(1)	P02768_RPEVDVMCTAFHDNEETFLKK_HexNAc(1)	File25372 Spectrum16608 scans: 21935
Q01780	AFAGNSK	N5(Deamidated)	1905.000	1351.58	2	676.795	694.329	0.016374	12.1147	0.98075	36	0.1351	0.002149	656.2276	Hex(1)HexNAc(1)Neu5Ac(1)	Q01780_AFAGNSK_Hex(1)HexNAc(1)Neu5Ac(1)	File25372 Spectrum2689 scans: 7231
Q9HC16	GRHETYLCYEVER	C8(Carbamidomethyl)	5557.000	3535.4	3	1179.47	1710.78	-0.0237015	-6.70405	0.038566	28	0.2066	0.004975	1823.6453	Fuc(1)Hex(3)HexNAc(3)Neu5Ac(2)	Q9HC16_GRHETYLCYEVER_Fuc(1)Hex(3)HexNAc(3)Neu5Ac(2)	File25372 Spectrum24796 scans: 30937
P02671	EVVTSEDGSDCPEAMDLGTLSGIGTLDGFR	C11(Carbamidomethyl)	4855.000	3783.64	3	1262.22	3127.4	0.0170956	4.51831	5.7241e-22	232	6.209e-07	0.002038	656.2276	Hex(1)HexNAc(1)Neu5Ac(1)	P02671_EVVTSEDGSDCPEAMDLGTLSGIGTLDGFR_Hex(1)HexNAc(1)Neu5Ac(1)	File25374 Spectrum20972 scans: 26586
P0C0L5	GVAHNNLMAMAQETGDNLYWGSVTGSQSNAVSPTPAPR	Q12(Deamidated)	4767.000	4877.17	4	1220.3	3928.81	0.030576	6.26922	4.8615e-23	217	5.11041e-10	0.00203757	947.3230	Hex(1)HexNAc(1)Neu5Ac(2)	P0C0L5_GVAHNNLMAMAQETGDNLYWGSVTGSQSNAVSPTPAPR_Hex(1)HexNAc(1)Neu5Ac(2)	File25374 Spectrum20429 scans: 26016
P01591	EVELDNQIVTATQSNICDEDSATETCYTYDR	Q13(Deamidated);C17(Carbamidomethyl);C26(Carbamidomethyl)	4564.000	4297.82	3	1433.61	3640.53	0.0571057	13.2871	6.5535e-17	201	1.44e-05	0.002038	656.2276	Hex(1)HexNAc(1)Neu5Ac(1)	P01591_EVELDNQIVTATQSNICDEDSATETCYTYDR_Hex(1)HexNAc(1)Neu5Ac(1)	File25374 Spectrum19168 scans: 24692
P00738	QLFAVDSGNDVTDIADDGCPKPPEIAHGYVEHSVR	C19(Carbamidomethyl)	3705.000	4010.9	3	1337.97	3807.78	0.0391037	9.74937	5.8615e-18	194	5.143e-08	0.002038	203.0794	HexNAc(1)	P00738_QLFAVDSGNDVTDIADDGCPKPPEIAHGYVEHSVR_HexNAc(1)	File25374 Spectrum14090 scans: 19360
Q14624	IEETTMTTQTPAPIQAPSAILPLPGQSVER		4750.000	3541.79	3	1181.6	3175.64	0.00952208	2.68849	1.4273e-15	167	6.631e-07	0.002038	365.1322	Hex(1)HexNAc(1)	Q14624_IEETTMTTQTPAPIQAPSAILPLPGQSVER_Hex(1)HexNAc(1)	File25374 Spectrum20307 scans: 25888
P01861::P01857	YPSDIAVEWESNGQPENNYK	N17(Deamidated);N18(Deamidated)	4746.000	2545.1	2	1273.56	2341	0.0179271	7.04377	5.4525e-12	148	0.0002918	0.002038	203.0794	HexNAc(1)	P01861::P01857_YPSDIAVEWESNGQPENNYK_HexNAc(1)	File25374 Spectrum20281 scans: 25861
P05155	PNATSSSSQDPESLQDRGEGK	N2(Deamidated)	2209.000	2556.11	3	853.044	2189.97	0.00813916	3.1842	1.9938e-08	148	0.006582	0.002038	365.1322	Hex(1)HexNAc(1)	P05155_PNATSSSSQDPESLQDRGEGK_Hex(1)HexNAc(1)	File25374 Spectrum4490 scans: 9224
P0C0L4	APVDLLGVAHNNLMAMAQETGDNLYWGSVTGSQSNAVSPTPAPR	M14(Oxidation);M16(Oxidation);N23(Deamidated)	4313.000	4935.21	4	1234.81	4569.15	-0.0766158	-15.5243	4.3695e-18	146	5.205e-06	0.002038	365.1322	Hex(1)HexNAc(1)	P0C0L4_APVDLLGVAHNNLMAMAQETGDNLYWGSVTGSQSNAVSPTPAPR_Hex(1)HexNAc(1)	File25374 Spectrum17743 scans: 23196
P02768	EVSKLVTDLTKVHTECCHGDLLECADDR	C16(Carbamidomethyl);C17(Carbamidomethyl);C24(Carbamidomethyl)	2744.000	3705.64	3	1236.22	3299.52	-0.0416903	-11.2505	4.9171e-12	145	0.000997	0.002038	406.1587	HexNAc(2)	P02768_EVSKLVTDLTKVHTECCHGDLLECADDR_HexNAc(2)	File25374 Spectrum7951 scans: 12882
P0C0L4::P0C0L5	WGSVTGSQSNAVSPTPAPR		3333.000	2554.16	2	1278.09	1897.93	0.00460822	1.8042	6.2251e-10	145	0.001481	0.002038	656.2276	Hex(1)HexNAc(1)Neu5Ac(1)	P0C0L4::P0C0L5_WGSVTGSQSNAVSPTPAPR_Hex(1)HexNAc(1)Neu5Ac(1)	File25374 Spectrum11816 scans: 16972
P01024	EKADIGCTPGSGKDYAGVFSDAGLTFTSSSGQQTAQR	C7(Carbamidomethyl)	4587.000	4741.98	4	1186.5	3793.75	-0.0943352	-19.8936	5.5629e-09	140	0.0002532	0.002038	947.3230	Hex(1)HexNAc(1)Neu5Ac(2)	P01024_EKADIGCTPGSGKDYAGVFSDAGLTFTSSSGQQTAQR_Hex(1)HexNAc(1)Neu5Ac(2)	File25374 Spectrum19297 scans: 24827
P01024	IGCTPGSGKDYAGVFSDAGLTFTSSSGQQTAQR	C3(Carbamidomethyl)	4598.000	3553.62	3	1185.55	3350.55	-0.0060771	-1.71012	1.1071e-11	137	0.0003754	0.002038	203.0794	HexNAc(1)	P01024_IGCTPGSGKDYAGVFSDAGLTFTSSSGQQTAQR_HexNAc(1)	File25374 Spectrum19355 scans: 24888
Q9Y6R7	YLCEDGCQNNCPACTPGQAQHYEGDR	C3(Carbamidomethyl);C7(Carbamidomethyl);Q8(Deamidated);N9(Deamidated);N10(Deamidated);C11(Carbamidomethyl);C14(Carbamidomethyl)	3414.000	3614.39	3	1205.8	3102.15	0.0454687	12.5799	3.5759e-11	137	4.66e-05	0.002038	511.1901	Fuc(1)Hex(1)HexNAc(1)	Q9Y6R7_YLCEDGCQNNCPACTPGQAQHYEGDR_Fuc(1)Hex(1)HexNAc(1)	File25374 Spectrum12356 scans: 17539
P00734	GKPGDFGYCDLNYCEEAVEEETGDGLDEDSDR	C9(Carbamidomethyl);N12(Deamidated);C14(Carbamidomethyl)	4735.000	4135.66	3	1379.56	3641.42	0.0606591	14.6674	1.0392e-08	136	0.003306	0.002038	494.1748	HexNAc(1)Neu5Ac(1)	P00734_GKPGDFGYCDLNYCEEAVEEETGDGLDEDSDR_HexNAc(1)Neu5Ac(1)	File25374 Spectrum20217 scans: 25793
P0C0L4	LLGVAHNNLMAMAQETGDNLYWGSVTGSQSNAVSPTPAPR	M10(Oxidation);M12(Oxidation)	3507.000	4698.1	5	940.627	4185.98	-0.0806421	-17.1648	1.1827e-14	135	0.0002923	0.002038	511.1901	Fuc(1)Hex(1)HexNAc(1)	P0C0L4_LLGVAHNNLMAMAQETGDNLYWGSVTGSQSNAVSPTPAPR_Fuc(1)Hex(1)HexNAc(1)	File25374 Spectrum12967 scans: 18181
P02749	PQHAMFGNDTITCTTHGNWTKLPECR	C13(Carbamidomethyl);N18(Deamidated);C25(Carbamidomethyl)	4273.000	3478.53	3	1160.52	3072.36	0.00912651	2.62367	3.2268e-11	132	0.0004434	0.002038	406.1587	HexNAc(2)	P02749_PQHAMFGNDTITCTTHGNWTKLPECR_HexNAc(2)	File25374 Spectrum17517 scans: 22958
P02652	EPCVESLVSQYFQTVTDYGKDLMEK	C3(Carbamidomethyl);Q10(Deamidated);Q13(Deamidated);M23(Oxidation)	4916.000	3930.7	3	1311.24	2983.34	0.0393985	10.0233	2.9266e-09	125	0.004658	0.002038	947.3230	Hex(1)HexNAc(1)Neu5Ac(2)	P02652_EPCVESLVSQYFQTVTDYGKDLMEK_Hex(1)HexNAc(1)Neu5Ac(2)	File25374 Spectrum21338 scans: 26970
P02656	DKFSEFWDLDPEVRPTSA		4888.000	3085.32	3	1029.45	2138	0.00322086	1.04393	3.6972e-07	124	0.02625	0.002333	947.3230	Hex(1)HexNAc(1)Neu5Ac(2)	P02656_DKFSEFWDLDPEVRPTSA_Hex(1)HexNAc(1)Neu5Ac(2)	File25374 Spectrum21172 scans: 26796
P05154	RVEDLHVGATVAPSSR		3052.000	2640.21	3	881.079	1692.89	0.0011395	0.431595	5.6058e-08	123	0.006138	0.002038	947.3230	Hex(1)HexNAc(1)Neu5Ac(2)	P05154_RVEDLHVGATVAPSSR_Hex(1)HexNAc(1)Neu5Ac(2)	File25374 Spectrum9970 scans: 15011
P00738	GNDVTDIADDGCPKPPEIAHGYVEHSVR	N2(Deamidated);C12(Carbamidomethyl)	3343.000	3454.56	3	1152.53	3048.39	0.0142428	4.12289	8.6256e-10	121	8.377e-05	0.002038	406.1587	HexNAc(2)	P00738_GNDVTDIADDGCPKPPEIAHGYVEHSVR_HexNAc(2)	File25374 Spectrum11879 scans: 17038
P01024	PESWLWNVEDLKEPPKNGISTK	N17(Deamidated)	4732.000	2932.45	3	978.49	2567.29	0.0249014	8.49169	2.5279e-08	116	0.008743	0.002333	365.1322	Hex(1)HexNAc(1)	P01024_PESWLWNVEDLKEPPKNGISTK_Hex(1)HexNAc(1)	File25374 Spectrum20199 scans: 25774
P01876	YTNPSQDVTVPCPVPSTPPTPSPSTPPTPSPSCCHPR	C33(Carbamidomethyl);C34(Carbamidomethyl);Q6(Deamidated);C12(Carbamidomethyl)	3668.000	4948.22	4	1238.06	3999.81	0.0912876	18.4485	6.1819e-07	113	0.001565	0.002038	947.3230	Hex(1)HexNAc(1)Neu5Ac(2)	P01876_YTNPSQDVTVPCPVPSTPPTPSPSTPPTPSPSCCHPR_Hex(1)HexNAc(1)Neu5Ac(2)	File25374 Spectrum13883 scans: 19143
P00747	SGTEASVVAPPPVVLLPDVETPSEEDCMFGNGK	C27(Carbamidomethyl);N31(Deamidated)	4868.000	4375.96	4	1095	3428.6	0.0371401	8.48729	2.1544e-06	113	0.01842	0.002333	947.3230	Hex(1)HexNAc(1)Neu5Ac(2)	P00747_SGTEASVVAPPPVVLLPDVETPSEEDCMFGNGK_Hex(1)HexNAc(1)Neu5Ac(2)	File25374 Spectrum21049 scans: 26667
P01042	SFNPISDFPDTTSPK		4751.000	2599.12	2	1300.57	1651.77	0.0226801	8.72607	2.5989e-06	109	0.002109	0.002038	947.3230	Hex(1)HexNAc(1)Neu5Ac(2)	P01042_SFNPISDFPDTTSPK_Hex(1)HexNAc(1)Neu5Ac(2)	File25374 Spectrum20316 scans: 25897
P04004	EDEYTVYDDGEEKNNATVHEQVGGPSLTSDLQAQSK	N14(Deamidated)	4532.000	4814.07	4	1204.52	3953.76	0.000351704	0.0730577	8.1529e-07	109	0.01255	0.002333	859.3070	Hex(1)HexNAc(2)Neu5Ac(1)	P04004_EDEYTVYDDGEEKNNATVHEQVGGPSLTSDLQAQSK_Hex(1)HexNAc(2)Neu5Ac(1)	File25374 Spectrum18990 scans: 24505
P01011	SPLDEENLTQENQDR		3319.000	2193.98	2	1098	1786.8	0.0255285	11.6357	8.952e-07	107	0.03226	0.002333	406.1587	HexNAc(2)	P01011_SPLDEENLTQENQDR_HexNAc(2)	File25374 Spectrum11721 scans: 16872
P04004	FTMPEDEYTVYDDGEEKNNATVHEQVGGPSLTSDLQAQSK		4508.000	4940.1	4	1236.03	4428.98	-0.075205	-15.2234	2.5748e-06	107	0.01968	0.002333	511.1901	Fuc(1)Hex(1)HexNAc(1)	P04004_FTMPEDEYTVYDDGEEKNNATVHEQVGGPSLTSDLQAQSK_Fuc(1)Hex(1)HexNAc(1)	File25374 Spectrum18856 scans: 24364
P12259	LRLELQGCEVNGCSTPLGMENGKIENK	C8(Carbamidomethyl);N11(Deamidated);C13(Carbamidomethyl);N21(Deamidated)	4094.000	3704.66	4	927.173	3047.44	-0.00298052	-0.804531	2.5209e-09	106	0.00891	0.002333	656.2276	Hex(1)HexNAc(1)Neu5Ac(1)	P12259_LRLELQGCEVNGCSTPLGMENGKIENK_Hex(1)HexNAc(1)Neu5Ac(1)	File25374 Spectrum16424 scans: 21811
P02671	ETESPRNPSSAGSWNSGSSGPGSTGNR		2703.000	3522.51	3	1175.18	2662.16	0.0422252	11.9872	1.7284e-06	104	0.03931	0.002333	859.3070	Hex(1)HexNAc(2)Neu5Ac(1)	P02671_ETESPRNPSSAGSWNSGSSGPGSTGNR_Hex(1)HexNAc(2)Neu5Ac(1)	File25374 Spectrum7674 scans: 12589
P05156	QMKACDGINDCGDQSDELCCK	M2(Oxidation);C5(Carbamidomethyl);C11(Carbamidomethyl);C19(Carbamidomethyl);C20(Carbamidomethyl)	2596.000	2925.16	3	976.059	2518.95	0.0473422	16.1845	3.6194e-09	104	0.002052	0.002038	406.1587	HexNAc(2)	P05156_QMKACDGINDCGDQSDELCCK_HexNAc(2)	File25374 Spectrum6977 scans: 11851
P07996	ACPPGYSGNGIQCTDVDECKEVPDACFNHNGEHR	C2(Carbamidomethyl);N9(Deamidated);Q12(Deamidated);C13(Carbamidomethyl);C19(Carbamidomethyl);C26(Carbamidomethyl);N30(Deamidated)	3820.000	4298.69	4	1075.68	3892.55	-0.0147918	-3.44101	3.9252e-07	103	0.01031	0.002333	406.1587	HexNAc(2)	P07996_ACPPGYSGNGIQCTDVDECKEVPDACFNHNGEHR_HexNAc(2)	File25374 Spectrum14825 scans: 20132
P01860	SVVTVPSSSLGTQTYTCNVNHKPSNTK	C17(Carbamidomethyl);N20(Deamidated)	4214.000	3312.57	4	829.149	2906.41	0.000193513	0.0584177	3.0932e-07	103	0.007347	0.002333	406.1587	HexNAc(2)	P01860_SVVTVPSSSLGTQTYTCNVNHKPSNTK_HexNAc(2)	File25374 Spectrum17165 scans: 22589
P01861	SVVTVPSSSLGTKTYTCNVDHKPSNTK	C17(Carbamidomethyl)	4214.000	3312.57	4	829.149	2906.44	-0.036192	-10.9257	3.0932e-07	103	0.01125	0.002333	406.1587	HexNAc(2)	P01861_SVVTVPSSSLGTKTYTCNVDHKPSNTK_HexNAc(2)	File25374 Spectrum17165 scans: 22589
B9A064	TGTKVTVLGQPKANPTVTLFPPSSEELQANK	Q10(Deamidated);N14(Deamidated)	4624.000	4201.09	4	1051.28	3253.71	0.0545055	12.9741	6.4034e-05	101	0.0669	0.002333	947.3230	Hex(1)HexNAc(1)Neu5Ac(2)	B9A064_TGTKVTVLGQPKANPTVTLFPPSSEELQANK_Hex(1)HexNAc(1)Neu5Ac(2)	File25374 Spectrum19501 scans: 25042
P00450	SEPEKVDKDNEDFQESNR		3034.000	2660.14	3	887.72	2164.95	0.00931752	3.50264	2.6687e-07	100	0.03694	0.002333	494.1748	HexNAc(1)Neu5Ac(1)	P00450_SEPEKVDKDNEDFQESNR_HexNAc(1)Neu5Ac(1)	File25374 Spectrum9847 scans: 14881
P01597	LLLLWLRGARCDIQMTQSPSSLSASVGDR	C11(Carbamidomethyl);Q14(Deamidated);M15(Oxidation)	3924.000	3757.77	3	1253.6	3246.65	-0.0644458	-17.15	3.5011e-05	99	0.0423	0.002333	511.1901	Fuc(1)Hex(1)HexNAc(1)	P01597_LLLLWLRGARCDIQMTQSPSSLSASVGDR_Fuc(1)Hex(1)HexNAc(1)	File25374 Spectrum15458 scans: 20796
P02768	LPSLAADFVESK		4781.000	3100.27	4	776.076	1275.67	-0.0455425	-14.6898	0.0023752	98	0.04921	0.002333	1823.6453	Fuc(1)Hex(3)HexNAc(3)Neu5Ac(2)	P02768_LPSLAADFVESK_Fuc(1)Hex(3)HexNAc(3)Neu5Ac(2)	File25374 Spectrum20514 scans: 26105
A0A0B4J1V0	VESGGGLVKPGGSLR		4778.000	1924	2	963.006	1411.78	0.0267514	13.904	0.00013934	98	0.02552	0.002333	511.1901	Fuc(1)Hex(1)HexNAc(1)	A0A0B4J1V0_VESGGGLVKPGGSLR_Fuc(1)Hex(1)HexNAc(1)	File25374 Spectrum20497 scans: 26087
A6NIZ1	MKNGQGFALVYSITAQSTFNDLQDLR	N3(Deamidated)	4588.000	3411.59	4	853.904	2917.43	-0.0175136	-5.13357	4.2858e-06	97	0.003117	0.002038	494.1748	HexNAc(1)Neu5Ac(1)	A6NIZ1_MKNGQGFALVYSITAQSTFNDLQDLR_HexNAc(1)Neu5Ac(1)	File25374 Spectrum19299 scans: 24829
Q14624	EETTMTTQTPAPIQAPSAILPLPGQSVER	Q8(Deamidated)	4898.000	4887.26	4	1222.82	3063.54	0.0733626	15.011	0.001078	96	0.1195	0.005178	1823.6453	Fuc(1)Hex(3)HexNAc(3)Neu5Ac(2)	Q14624_EETTMTTQTPAPIQAPSAILPLPGQSVER_Fuc(1)Hex(3)HexNAc(3)Neu5Ac(2)	File25374 Spectrum21232 scans: 26859
P0C0L4	SPEKLQETSNWLLSQQQADGSFQDPCPVLDR	Q6(Deamidated);N10(Deamidated);Q15(Deamidated);C26(Carbamidomethyl)	4268.000	3778.65	3	1260.56	3575.64	-0.0694517	-18.3801	1.4788e-06	95	0.01535	0.002333	203.0794	HexNAc(1)	P0C0L4_SPEKLQETSNWLLSQQQADGSFQDPCPVLDR_HexNAc(1)	File25374 Spectrum17490 scans: 22930
P00747	TEQLAPTAPPELTPVVQDCYHGDGQSYR	Q3(Deamidated);Q17(Deamidated);C19(Carbamidomethyl)	4629.000	4954.11	4	1239.53	3130.42	0.0458349	9.25189	0.0034648	95	0.1949	0.006034	1823.6453	Fuc(1)Hex(3)HexNAc(3)Neu5Ac(2)	P00747_TEQLAPTAPPELTPVVQDCYHGDGQSYR_Fuc(1)Hex(3)HexNAc(3)Neu5Ac(2)	File25374 Spectrum19531 scans: 25073
A0A0C4DH72	AIQMTQSPSSLSASVGDR	M4(Oxidation)	2977.000	3673.5	4	919.382	1849.88	-0.0291967	-7.94791	0.00019677	94	0.04329	0.002333	1823.6453	Fuc(1)Hex(3)HexNAc(3)Neu5Ac(2)	A0A0C4DH72_AIQMTQSPSSLSASVGDR_Fuc(1)Hex(3)HexNAc(3)Neu5Ac(2)	File25374 Spectrum9475 scans: 14491
P02774	MPAAQLPELPDVELPTNK	Q5(Deamidated)	4659.000	2166.1	3	723.042	1963	0.028141	12.9915	1.7e-05	94	0.008645	0.002333	203.0794	HexNAc(1)	P02774_MPAAQLPELPDVELPTNK_HexNAc(1)	File25374 Spectrum19708 scans: 25259
P08519	SSVLATSTAVSEQAPTEQSPTVQDCYHGDGQSYR	C25(Carbamidomethyl)	4599.000	4602.99	4	1151.76	3655.63	0.0370319	8.04518	0.11336	93	0.1447	0.005178	947.3230	Hex(1)HexNAc(1)Neu5Ac(2)	P08519_SSVLATSTAVSEQAPTEQSPTVQDCYHGDGQSYR_Hex(1)HexNAc(1)Neu5Ac(2)	File25374 Spectrum19362 scans: 24896
P02768	IAEVENDEMPADLPSLAADFVESK		4985.000	3100.37	3	1034.47	2589.22	-0.0319443	-10.3034	0.00011853	93	0.08161	0.002333	511.1901	Fuc(1)Hex(1)HexNAc(1)	P02768_IAEVENDEMPADLPSLAADFVESK_Fuc(1)Hex(1)HexNAc(1)	File25374 Spectrum21746 scans: 27399
P02768	NDEMPADLPSLAADFVESK	N1(Deamidated)	4842.000	2252.97	2	1127.49	2048.92	-0.0414742	-18.4087	3.6886e-06	92	0.009446	0.002333	203.0794	HexNAc(1)	P02768_NDEMPADLPSLAADFVESK_HexNAc(1)	File25374 Spectrum20896 scans: 26506
P01593	LLWLSGARCDIQMTQSPSSLSASVGDR	C9(Carbamidomethyl);M13(Oxidation)	3423.000	3315.55	3	1106.19	2950.43	-0.0063196	-1.90605	3.9966e-07	92	0.001556	0.002038	365.1322	Hex(1)HexNAc(1)	P01593_LLWLSGARCDIQMTQSPSSLSASVGDR_Hex(1)HexNAc(1)	File25374 Spectrum12417 scans: 17603
P02787	FVKHSTIFENLANK		4804.000	2304.12	3	769.047	1646.88	0.0103608	4.49666	1.8303e-05	91	0.01425	0.002333	656.2276	Hex(1)HexNAc(1)Neu5Ac(1)	P02787_FVKHSTIFENLANK_Hex(1)HexNAc(1)Neu5Ac(1)	File25374 Spectrum20654 scans: 26252
P01834	VQWKVDNALQSGNSQESVTEQDSK	Q2(Deamidated);N7(Deamidated);N13(Deamidated)	2724.000	3174.41	2	1588.21	2679.21	0.0136151	4.28901	2.1732e-05	90	0.0214	0.002333	494.1748	HexNAc(1)Neu5Ac(1)	P01834_VQWKVDNALQSGNSQESVTEQDSK_HexNAc(1)Neu5Ac(1)	File25374 Spectrum7810 scans: 12732
P02768	DEMPADLPSLAADFVESK	M3(Oxidation)	4848.000	2152.97	2	1077.49	1949.89	0.0022229	1.03248	9.5223e-06	89	0.006294	0.002038	203.0794	HexNAc(1)	P02768_DEMPADLPSLAADFVESK_HexNAc(1)	File25374 Spectrum20929 scans: 26541
P02768	IAEVENDEMPADLPSLAADFVESK	N6(Deamidated)	4848.000	3084.35	3	1029.12	2590.2	-0.0230599	-7.47643	6.3832e-05	89	0.05512	0.002333	494.1748	HexNAc(1)Neu5Ac(1)	P02768_IAEVENDEMPADLPSLAADFVESK_HexNAc(1)Neu5Ac(1)	File25374 Spectrum20933 scans: 26545
Q04756	AVPSSSSPQAQALTEDGRPCR	C20(Carbamidomethyl)	3051.000	2869.28	3	957.435	2213.05	0.00667757	2.32726	0.0022148	89	0.1595	0.005178	656.2276	Hex(1)HexNAc(1)Neu5Ac(1)	Q04756_AVPSSSSPQAQALTEDGRPCR_Hex(1)HexNAc(1)Neu5Ac(1)	File25374 Spectrum9966 scans: 15006
P02768	HPEAKRMPCAEDYLSVVLNQLCVLHEK	C9(Carbamidomethyl);N19(Deamidated);C22(Carbamidomethyl)	4609.000	3643.67	4	911.926	3236.58	-0.0655341	-17.9857	2.5035e-05	88	0.1341	0.005178	406.1587	HexNAc(2)	P02768_HPEAKRMPCAEDYLSVVLNQLCVLHEK_HexNAc(2)	File25374 Spectrum19417 scans: 24953
P02671	PGSPRPGSTGTWNPGSSER		2775.000	2582.13	3	861.718	1925.9	0.00686924	2.6603	1.0617e-05	88	0.01744	0.002333	656.2276	Hex(1)HexNAc(1)Neu5Ac(1)	P02671_PGSPRPGSTGTWNPGSSER_Hex(1)HexNAc(1)Neu5Ac(1)	File25374 Spectrum8141 scans: 13088
P01009	EDPQGDAAQKTDTSHHDQDHPTFNK		1967.000	3474.46	4	869.623	2818.22	0.0174025	5.00868	3.5828e-06	87	0.0019	0.002038	656.2276	Hex(1)HexNAc(1)Neu5Ac(1)	P01009_EDPQGDAAQKTDTSHHDQDHPTFNK_Hex(1)HexNAc(1)Neu5Ac(1)	File25374 Spectrum2987 scans: 7646
P09871	GAFAVQDPNDKTK		2163.000	2337.03	3	780.017	1389.69	0.0176272	7.54258	0.00010956	87	0.06235	0.002333	947.3230	Hex(1)HexNAc(1)Neu5Ac(2)	P09871_GAFAVQDPNDKTK_Hex(1)HexNAc(1)Neu5Ac(2)	File25374 Spectrum4194 scans: 8913
P02768	LVTDLTKVHTECCHGDLLECADDR	C12(Carbamidomethyl);C13(Carbamidomethyl);C20(Carbamidomethyl)	3414.000	3513.46	5	703.699	2856.28	-0.0544134	-15.4871	1.1108e-05	85	0.07771	0.002333	656.2276	Hex(1)HexNAc(1)Neu5Ac(1)	P02768_LVTDLTKVHTECCHGDLLECADDR_Hex(1)HexNAc(1)Neu5Ac(1)	File25374 Spectrum12358 scans: 17541
P02671	LTDMPQMRMELERPGGNEITRGGSTSYGTGSETESPR	M4(Oxidation);M9(Oxidation);N17(Deamidated)	2133.000	4717.03	4	1180.26	4059.82	-0.0227964	-4.83278	1.4828e-06	84	0.007045	0.002333	656.2276	Hex(1)HexNAc(1)Neu5Ac(1)	P02671_LTDMPQMRMELERPGGNEITRGGSTSYGTGSETESPR_Hex(1)HexNAc(1)Neu5Ac(1)	File25374 Spectrum4006 scans: 8716
P02786	LAGTESPVREEPGEDFPAAR		3728.000	3075.35	3	1026.12	2127.02	0.00104048	0.338328	0.0050278	84	0.1618	0.005178	947.3230	Hex(1)HexNAc(1)Neu5Ac(2)	P02786_LAGTESPVREEPGEDFPAAR_Hex(1)HexNAc(1)Neu5Ac(2)	File25374 Spectrum14236 scans: 19513
P02671	WNSGSSGPGSTGNR	N2(Deamidated)	2618.000	2020.84	2	1011.43	1363.58	0.0369082	18.2638	0.00024998	84	0.08373	0.002333	656.2276	Hex(1)HexNAc(1)Neu5Ac(1)	P02671_WNSGSSGPGSTGNR_Hex(1)HexNAc(1)Neu5Ac(1)	File25374 Spectrum7121 scans: 12002
P00738	TPKSPVGVQPILNEHTFCAGMSK	Q9(Deamidated);C18(Carbamidomethyl);M21(Oxidation)	4061.000	2920.34	4	731.093	2514.22	-0.0416861	-14.2744	7.143e-05	83	0.07872	0.002333	406.1587	HexNAc(2)	P00738_TPKSPVGVQPILNEHTFCAGMSK_HexNAc(2)	File25374 Spectrum16228 scans: 21605
P08603	VLCQENYLIQEGEEITCK	C3(Carbamidomethyl);C17(Carbamidomethyl)	4745.000	2428.16	3	810.394	2225.03	0.0475508	19.583	2.6565e-05	83	0.0064	0.002038	203.0794	HexNAc(1)	P08603_VLCQENYLIQEGEEITCK_HexNAc(1)	File25374 Spectrum20278 scans: 25857
P00450	ESLLLEDNIRMFTTAPDQVDKEDEDFQESNK	N8(Deamidated)	3505.000	4151.77	5	831.362	3656.67	-0.071133	-17.1332	8.437e-06	83	0.03731	0.002333	494.1748	HexNAc(1)Neu5Ac(1)	P00450_ESLLLEDNIRMFTTAPDQVDKEDEDFQESNK_HexNAc(1)Neu5Ac(1)	File25374 Spectrum12954 scans: 18167
P02768	AEFAEVSKLVTDLTKVHTECCHGDLLECADDR	C20(Carbamidomethyl);C21(Carbamidomethyl);C28(Carbamidomethyl)	2753.000	4123.79	3	1375.6	3717.71	-0.074325	-18.0235	5.4352e-06	83	0.04176	0.002333	406.1587	HexNAc(2)	P02768_AEFAEVSKLVTDLTKVHTECCHGDLLECADDR_HexNAc(2)	File25374 Spectrum7999 scans: 12937
P01861::P01857	TKNQVSLTCLVKGFYPSDIAVEWESNGQPENNYK	N3(Deamidated);Q4(Deamidated);C9(Carbamidomethyl)	4704.000	4323.93	3	1442.32	3916.85	-0.0828475	-19.1603	1.9113e-05	82	0.03834	0.002333	406.1587	HexNAc(2)	P01861::P01857_TKNQVSLTCLVKGFYPSDIAVEWESNGQPENNYK_HexNAc(2)	File25374 Spectrum20014 scans: 25580
O75882	SDTVECECSENWKGEACDIPHCTDNCGFPHR	C6(Carbamidomethyl);C8(Carbamidomethyl);C17(Carbamidomethyl);C22(Carbamidomethyl);N25(Deamidated);C26(Carbamidomethyl)	3622.000	4173.64	5	835.735	3767.44	0.0354543	8.49481	0.00034346	82	0.05046	0.002333	406.1587	HexNAc(2)	O75882_SDTVECECSENWKGEACDIPHCTDNCGFPHR_HexNAc(2)	File25374 Spectrum13625 scans: 18872
B9A064	SCQVTHEGSTVEK	C2(Carbamidomethyl)	2473.000	2320.98	4	581.252	1460.66	0.0132685	5.71677	0.0019962	81	0.05366	0.002333	859.3070	Hex(1)HexNAc(2)Neu5Ac(1)	B9A064_SCQVTHEGSTVEK_Hex(1)HexNAc(2)Neu5Ac(1)	File25374 Spectrum6203 scans: 11023
P01023	LTAQPAPTSEDLTSATNIVK	Q4(Deamidated)	4010.000	2917.36	3	973.461	2057.05	-0.000328326	-0.112542	0.0028982	79	0.07747	0.002333	859.3070	Hex(1)HexNAc(2)Neu5Ac(1)	P01023_LTAQPAPTSEDLTSATNIVK_Hex(1)HexNAc(2)Neu5Ac(1)	File25374 Spectrum15936 scans: 21298
P02768	EVENDEMPADLPSLAADFVESK	M7(Oxidation)	4761.000	2933.29	3	978.771	2421.09	0.0100502	3.42624	5.9707e-06	79	0.00931	0.002333	511.1901	Fuc(1)Hex(1)HexNAc(1)	P02768_EVENDEMPADLPSLAADFVESK_Fuc(1)Hex(1)HexNAc(1)	File25374 Spectrum20381 scans: 25966
A0A0C4DH68	LLMLWVPGSSGDIVMTQTPLSSPVTLGQPASISCR	C34(Carbamidomethyl);Q17(Deamidated)	4526.000	4356.14	5	872.236	3698.87	0.040973	9.4058	0.00022496	79	0.06894	0.002333	656.2276	Hex(1)HexNAc(1)Neu5Ac(1)	A0A0C4DH68_LLMLWVPGSSGDIVMTQTPLSSPVTLGQPASISCR_Hex(1)HexNAc(1)Neu5Ac(1)	File25374 Spectrum18958 scans: 24471
P01009	LAGLCCLVPVSLAEDPQGDAAQKTDTSHHDQDHPTFNK	C5(Carbamidomethyl);C6(Carbamidomethyl);Q17(Deamidated);Q22(Deamidated)	2194.000	4668.05	4	1168.02	4173.9	-0.0274926	-5.88952	0.00075483	79	0.1375	0.005178	494.1748	HexNAc(1)Neu5Ac(1)	P01009_LAGLCCLVPVSLAEDPQGDAAQKTDTSHHDQDHPTFNK_HexNAc(1)Neu5Ac(1)	File25374 Spectrum4389 scans: 9118
P00738	DKLPECEADDGCPKPPEIAHGYVEHSVR	C6(Carbamidomethyl);C12(Carbamidomethyl)	3757.000	3408.56	3	1137.19	3204.46	0.012655	3.71273	0.0028644	79	0.1658	0.005178	203.0794	HexNAc(1)	P00738_DKLPECEADDGCPKPPEIAHGYVEHSVR_HexNAc(1)	File25374 Spectrum14417 scans: 19703
P04196	TTKPPFKPHGSR		1979.000	2211.02	3	738.013	1351.74	-0.0261977	-11.8487	0.0040944	78	0.08905	0.003431	859.3070	Hex(1)HexNAc(2)Neu5Ac(1)	P04196_TTKPPFKPHGSR_Hex(1)HexNAc(2)Neu5Ac(1)	File25374 Spectrum3063 scans: 7726
P17936	SAGSVESPSVSSTHR		2435.000	2434.02	3	812.349	1486.7	0.0006716	0.275921	0.0065307	77	0.1321	0.005178	947.3230	Hex(1)HexNAc(1)Neu5Ac(2)	P17936_SAGSVESPSVSSTHR_Hex(1)HexNAc(1)Neu5Ac(2)	File25374 Spectrum5954 scans: 10761
P01009	LAEDPQGDAAQKTDTSHHDQDHPTFNK		1667.000	3658.5	3	1220.51	3002.34	-0.0632988	-17.3018	0.00034842	77	0.01763	0.002333	656.2276	Hex(1)HexNAc(1)Neu5Ac(1)	P01009_LAEDPQGDAAQKTDTSHHDQDHPTFNK_Hex(1)HexNAc(1)Neu5Ac(1)	File25374 Spectrum1160 scans: 5716
P02671	CLVLSVVGTAWTADSGEGDFLAEGGGVR	C1(Carbamidomethyl)	4421.000	3228.47	4	808.126	2822.35	-0.0399143	-12.3632	0.005864	75	0.05399	0.002333	406.1587	HexNAc(2)	P02671_CLVLSVVGTAWTADSGEGDFLAEGGGVR_HexNAc(2)	File25374 Spectrum18353 scans: 23836
P01602	LLWLPGAKCDIQMTQSPSTLSASVGDR	C9(Carbamidomethyl);Q12(Deamidated)	3158.000	3791.69	4	948.93	2931.45	-0.0656032	-17.3018	0.0061037	74	0.1564	0.005178	859.3070	Hex(1)HexNAc(2)Neu5Ac(1)	P01602_LLWLPGAKCDIQMTQSPSTLSASVGDR_Hex(1)HexNAc(2)Neu5Ac(1)	File25374 Spectrum10677 scans: 15767
P01602	MTQSPSTLSASVGDR	M1(Oxidation)	2624.000	1957.92	3	653.646	1551.72	0.0378851	19.3497	0.0012342	73	0.04654	0.002333	406.1587	HexNAc(2)	P01602_MTQSPSTLSASVGDR_HexNAc(2)	File25374 Spectrum7160 scans: 12043
P00450	DHPEKVNKDDEEFIESNK		2669.000	2538.12	4	635.538	2172	-0.00728084	-2.86859	0.0052313	73	0.1542	0.005178	365.1322	Hex(1)HexNAc(1)	P00450_DHPEKVNKDDEEFIESNK_Hex(1)HexNAc(1)	File25374 Spectrum7448 scans: 12352
P01602	LWLPGAKCDIQMTQSPSTLSASVGDR	C8(Carbamidomethyl);Q11(Deamidated);M12(Oxidation)	3953.000	3781.62	4	946.412	2834.36	-0.0607852	-16.0738	0.051954	73	0.1504	0.005178	947.3230	Hex(1)HexNAc(1)Neu5Ac(2)	P01602_LWLPGAKCDIQMTQSPSTLSASVGDR_Hex(1)HexNAc(1)Neu5Ac(2)	File25374 Spectrum15620 scans: 20967
P01042	FSVATQTCQITPAEGPVVTAQY	C8(Carbamidomethyl)	4681.000	3023.37	3	1008.8	2367.14	0.00560851	1.85505	0.0098149	72	0.1894	0.006034	656.2276	Hex(1)HexNAc(1)Neu5Ac(1)	P01042_FSVATQTCQITPAEGPVVTAQY_Hex(1)HexNAc(1)Neu5Ac(1)	File25374 Spectrum19870 scans: 25429
P02748	VGDRRQCVPTEPCEDAEDDCGNDFQCSTGR	C7(Carbamidomethyl);C13(Carbamidomethyl);C20(Carbamidomethyl);C26(Carbamidomethyl)	3891.000	4185.61	3	1396.21	3529.4	-0.0190572	-4.55302	0.0094081	72	0.1951	0.006034	656.2276	Hex(1)HexNAc(1)Neu5Ac(1)	P02748_VGDRRQCVPTEPCEDAEDDCGNDFQCSTGR_Hex(1)HexNAc(1)Neu5Ac(1)	File25374 Spectrum15266 scans: 20595
P08519	EGTVVAPPTVIQVPSLGPPSEQDCMFGNGK	Q22(Deamidated);C24(Carbamidomethyl);N28(Deamidated)	5107.000	3606.67	3	1203.23	3112.47	0.0185676	5.14813	0.30282	72	0.1647	0.005178	494.1748	HexNAc(1)Neu5Ac(1)	P08519_EGTVVAPPTVIQVPSLGPPSEQDCMFGNGK_HexNAc(1)Neu5Ac(1)	File25374 Spectrum22426 scans: 28125
B9A064	VTVLGQPKANPTVTLFPPSSEELQANK	Q6(Deamidated)	4829.000	3068.54	3	1023.85	2865.51	-0.0534187	-17.4085	5.1561e-05	71	0.01791	0.002333	203.0794	HexNAc(1)	B9A064_VTVLGQPKANPTVTLFPPSSEELQANK_HexNAc(1)	File25374 Spectrum20818 scans: 26424
A0A0C4DH72	RCAIQMTQSPSSLSASVGDR	C2(Carbamidomethyl);Q5(Deamidated);M6(Oxidation)	3318.000	2824.25	3	942.423	2167	0.0169363	5.99675	0.0035208	69	0.1485	0.005178	656.2276	Hex(1)HexNAc(1)Neu5Ac(1)	A0A0C4DH72_RCAIQMTQSPSSLSASVGDR_Hex(1)HexNAc(1)Neu5Ac(1)	File25374 Spectrum11715 scans: 16866
P01024	VQKEDIPPADLSDQVPDTESETR		3734.000	2772.31	4	694.086	2568.22	0.0115051	4.14999	0.001788	69	0.1538	0.005178	203.0794	HexNAc(1)	P01024_VQKEDIPPADLSDQVPDTESETR_HexNAc(1)	File25374 Spectrum14274 scans: 19553
P02768	AAFTECCQAADK	C6(Carbamidomethyl);C7(Carbamidomethyl)	3066.000	1864.76	2	933.387	1370.56	0.0247616	13.2787	0.018711	68	0.2079	0.006034	494.1748	HexNAc(1)Neu5Ac(1)	P02768_AAFTECCQAADK_HexNAc(1)Neu5Ac(1)	File25374 Spectrum10065 scans: 15110
P05543	ATLLKMGIQHAYSENADFSGLTEDNGLK	M6(Oxidation);Q9(Deamidated);N25(Deamidated)	3651.000	3405.55	4	852.396	3040.43	-0.0116526	-3.42163	0.0062234	67	0.08627	0.002333	365.1322	Hex(1)HexNAc(1)	P05543_ATLLKMGIQHAYSENADFSGLTEDNGLK_Hex(1)HexNAc(1)	File25374 Spectrum13787 scans: 19042
P19827	RTFVLSALQPSPTHSSSNTQR		4087.000	3260.51	4	816.136	2313.18	0.00893804	2.7413	0.17004	65	0.2165	0.006914	947.3230	Hex(1)HexNAc(1)Neu5Ac(2)	P19827_RTFVLSALQPSPTHSSSNTQR_Hex(1)HexNAc(1)Neu5Ac(2)	File25374 Spectrum16382 scans: 21767
P01861::P01857	PSDIAVEWESNGQPENNYK	N11(Deamidated)	4683.000	2542.13	3	848.385	2176.95	0.0469634	18.474	0.021006	64	0.1299	0.005178	365.1322	Hex(1)HexNAc(1)	P01861::P01857_PSDIAVEWESNGQPENNYK_Hex(1)HexNAc(1)	File25374 Spectrum19877 scans: 25436
P01860::P01857	CNVNHKPSNTKVDK	C1(Carbamidomethyl);N2(Deamidated)	2188.000	1844.86	2	923.438	1640.79	-0.0138751	-7.52094	0.00078061	64	0.1374	0.005178	203.0794	HexNAc(1)	P01860::P01857_CNVNHKPSNTKVDK_HexNAc(1)	File25374 Spectrum4353 scans: 9080
P02787	GSGLNLCEPNNK	C7(Carbamidomethyl)	4247.000	1707.74	2	854.875	1301.6	-0.0258521	-15.1382	0.0028141	64	0.08137	0.002333	406.1587	HexNAc(2)	P02787_GSGLNLCEPNNK_HexNAc(2)	File25374 Spectrum17358 scans: 22791
A0A0C4DH72	PGARCAIQMTQSPSSLSASVGDR	C5(Carbamidomethyl);M9(Oxidation);Q11(Deamidated)	3026.000	2886.29	3	963.104	2392.11	0.00396356	1.37324	0.0019741	64	0.09631	0.003431	494.1748	HexNAc(1)Neu5Ac(1)	A0A0C4DH72_PGARCAIQMTQSPSSLSASVGDR_HexNAc(1)Neu5Ac(1)	File25374 Spectrum9796 scans: 14828
P01861	SVVTVPSSSLGTKTYTCNVDHKPSNTKVDK	C17(Carbamidomethyl)	4004.000	3654.75	4	914.695	3248.63	-0.044112	-12.0698	0.024407	62	0.2042	0.006034	406.1587	HexNAc(2)	P01861_SVVTVPSSSLGTKTYTCNVDHKPSNTKVDK_HexNAc(2)	File25374 Spectrum15899 scans: 21259
Q9UJJ9	TRPTETSNLEHLGHETPR		2612.000	2730.25	4	683.57	2074.02	0.00571499	2.09321	0.0053959	62	0.09491	0.003431	656.2276	Hex(1)HexNAc(1)Neu5Ac(1)	Q9UJJ9_TRPTETSNLEHLGHETPR_Hex(1)HexNAc(1)Neu5Ac(1)	File25374 Spectrum7083 scans: 11962
P01834	LQSGNSQESVTEQDSK	N5(Deamidated)	2782.000	2230.91	3	744.645	1736.77	-0.0325959	-14.611	0.017992	62	0.223	0.006914	494.1748	HexNAc(1)Neu5Ac(1)	P01834_LQSGNSQESVTEQDSK_HexNAc(1)Neu5Ac(1)	File25374 Spectrum8187 scans: 13136
P01860	SVVTVPSSSLGTQTYTCNVNHKPSNTKVDK	C17(Carbamidomethyl);N20(Deamidated)	4004.000	3654.75	4	914.695	3248.6	-0.00772649	-2.1141	0.024407	62	0.1777	0.006034	406.1587	HexNAc(2)	P01860_SVVTVPSSSLGTQTYTCNVNHKPSNTKVDK_HexNAc(2)	File25374 Spectrum15899 scans: 21259
P04003	CCPEPKLNNGEITQHR	C1(Carbamidomethyl);C2(Carbamidomethyl);N8(Deamidated);N9(Deamidated)	2157.000	2361.01	6	394.509	1953.87	-0.0197223	-8.35334	0.27646	61	0.2171	0.006914	406.1587	HexNAc(2)	P04003_CCPEPKLNNGEITQHR_HexNAc(2)	File25374 Spectrum4152 scans: 8869
P51884	SSPNCAPECNCPESYPSAMYCDELK	N4(Deamidated);C5(Carbamidomethyl);C9(Carbamidomethyl);C11(Carbamidomethyl);C21(Carbamidomethyl)	4050.000	3169.25	3	1057.42	2966.12	0.0495546	15.6361	0.0014275	61	0.04911	0.002333	203.0794	HexNAc(1)	P51884_SSPNCAPECNCPESYPSAMYCDELK_HexNAc(1)	File25374 Spectrum16165 scans: 21539
Q9H9L7	PPPPFQTQTPPQSLQQPAPPGSER	Q12(Deamidated);Q15(Deamidated)	3655.000	2990.39	4	748.604	2583.26	-0.0348062	-11.6394	0.02403	61	0.2245	0.006914	406.1587	HexNAc(2)	Q9H9L7_PPPPFQTQTPPQSLQQPAPPGSER_HexNAc(2)	File25374 Spectrum13812 scans: 19068
Q92887	GINLSGGQK	N3(Deamidated);Q8(Deamidated)	2114.000	1821.79	3	608.27	874.44	0.0267591	14.6884	0.0039246	60	0.2245	0.006914	947.3230	Hex(1)HexNAc(1)Neu5Ac(2)	Q92887_GINLSGGQK_Hex(1)HexNAc(1)Neu5Ac(2)	File25374 Spectrum3891 scans: 8595
P01860::P01857	CNVNHKPSNTK	C1(Carbamidomethyl);N2(Deamidated)	2162.000	1502.67	2	752.342	1298.6	-0.0171551	-11.4164	0.00093453	60	0.1832	0.006034	203.0794	HexNAc(1)	P01860::P01857_CNVNHKPSNTK_HexNAc(1)	File25374 Spectrum4190 scans: 8909
Q96J66	GLNLSGGQK	N3(Deamidated);Q8(Deamidated)	2114.000	1821.79	3	608.27	874.44	0.0267591	14.6884	0.0039246	60	0.2245	0.006914	947.3230	Hex(1)HexNAc(1)Neu5Ac(2)	Q96J66_GLNLSGGQK_Hex(1)HexNAc(1)Neu5Ac(2)	File25374 Spectrum3891 scans: 8595
A0A075B6S5	TRCDIQMTQSPSSLSASVGDR	C3(Carbamidomethyl);Q6(Deamidated)	4215.000	2791.22	3	931.413	2296.04	-0.00345681	-1.23846	0.016433	59	0.19	0.006034	494.1748	HexNAc(1)Neu5Ac(1)	A0A075B6S5_TRCDIQMTQSPSSLSASVGDR_HexNAc(1)Neu5Ac(1)	File25374 Spectrum17168 scans: 22592
P00738	SGNDVTDIADDGCPKPPEIAHGYVEHSVR	C13(Carbamidomethyl)	3763.000	3628.67	5	726.741	3134.44	0.056477	15.5641	0.27105	59	0.2093	0.006034	494.1748	HexNAc(1)Neu5Ac(1)	P00738_SGNDVTDIADDGCPKPPEIAHGYVEHSVR_HexNAc(1)Neu5Ac(1)	File25374 Spectrum14457 scans: 19745
P01024	MVFQALAQYQKDAPDHQELNLDVSLQLPSR	Q8(Deamidated);Q17(Deamidated)	4638.000	4403.06	6	734.851	3455.7	0.0374212	8.49889	0.6575	58	0.1887	0.006034	947.3230	Hex(1)HexNAc(1)Neu5Ac(2)	P01024_MVFQALAQYQKDAPDHQELNLDVSLQLPSR_Hex(1)HexNAc(1)Neu5Ac(2)	File25374 Spectrum19581 scans: 25126
P02671	GTGSETESPR		2127.000	1514.65	2	758.332	1019.45	0.0188113	12.4196	0.014056	57	0.1696	0.005178	494.1748	HexNAc(1)Neu5Ac(1)	P02671_GTGSETESPR_HexNAc(1)Neu5Ac(1)	File25374 Spectrum3972 scans: 8680
P01031	KPSREESSSGSSHAVMDISLPTGISANEEDLK	M16(Oxidation)	3496.000	3738.76	5	748.76	3373.59	0.0380602	10.1799	0.02641	55	0.1906	0.006034	365.1322	Hex(1)HexNAc(1)	P01031_KPSREESSSGSSHAVMDISLPTGISANEEDLK_Hex(1)HexNAc(1)	File25374 Spectrum12895 scans: 18105
P02751	GQMMSCTCLGNGKGEFK	M3(Oxidation);M4(Oxidation);C6(Carbamidomethyl);C8(Carbamidomethyl);N11(Deamidated)	2458.000	2430.96	4	608.746	1936.78	0.00255497	1.05101	0.15465	51	0.2206	0.006914	494.1748	HexNAc(1)Neu5Ac(1)	P02751_GQMMSCTCLGNGKGEFK_HexNAc(1)Neu5Ac(1)	File25374 Spectrum6094 scans: 10908
P13671	QPCINDDEEMKEVDLPEIEADSGCPQPVPPENGFIR	C3(Carbamidomethyl);N5(Deamidated);C24(Carbamidomethyl);N32(Deamidated)	4421.000	4985.17	5	998.041	4125.81	0.0501752	10.0649	0.53062	49	0.1371	0.005178	859.3070	Hex(1)HexNAc(2)Neu5Ac(1)	P13671_QPCINDDEEMKEVDLPEIEADSGCPQPVPPENGFIR_Hex(1)HexNAc(2)Neu5Ac(1)	File25374 Spectrum18354 scans: 23837
P00736	PDLDTSSNAVDLLFFTDESGDSR		4962.000	2865.3	3	956.107	2500.12	0.0443132	15.4655	0.0086592	26	0.07966	0.002333	365.1322	Hex(1)HexNAc(1)	P00736_PDLDTSSNAVDLLFFTDESGDSR_Hex(1)HexNAc(1)	File25374 Spectrum21611 scans: 27257

## Sheet: Table S2C
Table S2C. Total
Proteins	Sequence	Modifications	RT [sec]	Precursor Mass	Precursor Charge	Precursor m/z	Peptide Mass	Mass Error [Da]	Mass Error [ppm]	PSM e-value	Rank Score	percolator:PEP	percolator:Q value	Delta Mass	Delta Name	Intact glycopeptides	MS File	MS Title
P00747	IPSCDSSPVSTEQLAPTAPPELTPVVQDCYHGDGQSYR	C4(Carbamidomethyl);C29(Carbamidomethyl)	4582.000	4814.16	3	1605.73	4157.89	0.0357319	7.42225	4.102e-23	235	1.73345e-06	0.00145952	656.2276	Hex(1)HexNAc(1)Neu5Ac(1)	P00747_IPSCDSSPVSTEQLAPTAPPELTPVVQDCYHGDGQSYR_Hex(1)HexNAc(1)Neu5Ac(1)	YXY_20200723_HF_HILIC_2ul_1	File25305 Spectrum17313 scans: 22700
P02765	TVVQPSVGAAAGPVVPPCPGR	C18(Carbamidomethyl)	4071.000	2671.31	2	1336.66	2015.06	0.0238172	8.9159	3.1154e-16	210	3.994e-05	0.00146	656.2276	Hex(1)HexNAc(1)Neu5Ac(1)	P02765_TVVQPSVGAAAGPVVPPCPGR_Hex(1)HexNAc(1)Neu5Ac(1)	YXY_20200723_HF_HILIC_2ul_1	File25305 Spectrum14486 scans: 19730
P02671	SETESPRNPSSAGSWNSGSSGPGSTGNR	N16(Deamidated)	2577.000	3406.47	3	1136.5	2750.18	0.0642498	18.8611	4.8287e-18	208	1.658e-05	0.00146	656.2276	Hex(1)HexNAc(1)Neu5Ac(1)	P02671_SETESPRNPSSAGSWNSGSSGPGSTGNR_Hex(1)HexNAc(1)Neu5Ac(1)	YXY_20200723_HF_HILIC_2ul_1	File25305 Spectrum6100 scans: 10920
Q14624	IEETTMTTQTPAPIQAPSAILPLPGQSVER	M6(Oxidation)	4823.000	3847.9	3	1283.64	3191.64	0.0357761	9.29756	3.4959e-19	206	1.799e-05	0.00146	656.2276	Hex(1)HexNAc(1)Neu5Ac(1)	Q14624_IEETTMTTQTPAPIQAPSAILPLPGQSVER_Hex(1)HexNAc(1)Neu5Ac(1)	YXY_20200723_HF_HILIC_2ul_1	File25305 Spectrum18619 scans: 24129
P02671	MADEAGSEADHEGTHSTKR		1610.000	2684.09	4	672.029	2027.86	0.00019886	0.0740883	2.3958e-15	204	6.008e-05	0.00146	656.2276	Hex(1)HexNAc(1)Neu5Ac(1)	P02671_MADEAGSEADHEGTHSTKR_Hex(1)HexNAc(1)Neu5Ac(1)	YXY_20200723_HF_HILIC_2ul_1	File25305 Spectrum621 scans: 5167
P02790	TPLPPTSAHGNVAEGETKPDPDVTER		2933.000	3370.55	2	1686.28	2714.31	0.0122949	3.64775	3.9407e-20	204	4.083e-05	0.00146	656.2276	Hex(1)HexNAc(1)Neu5Ac(1)	P02790_TPLPPTSAHGNVAEGETKPDPDVTER_Hex(1)HexNAc(1)Neu5Ac(1)	YXY_20200723_HF_HILIC_2ul_1	File25305 Spectrum8155 scans: 13083
P02790	TPLPPTSAHGNVAEGETKPDPDVTER		2963.000	3370.56	2	1686.29	2714.31	0.0140949	4.18178	9.8487e-19	200	9.802e-05	0.00146	656.2276	Hex(1)HexNAc(1)Neu5Ac(1)	P02790_TPLPPTSAHGNVAEGETKPDPDVTER_Hex(1)HexNAc(1)Neu5Ac(1)	YXY_20200723_HF_HILIC_2ul_1	File25305 Spectrum8331 scans: 13268
P01876	HYTNPSQDVTVPCPVPSTPPTPSPSTPPTPSPSCCHPR	C34(Carbamidomethyl);C35(Carbamidomethyl);C13(Carbamidomethyl)	3699.000	4501.02	4	1126.26	4135.88	0.00405994	0.902004	3.9549e-22	200	2.542e-06	0.00146	365.1322	Hex(1)HexNAc(1)	P01876_HYTNPSQDVTVPCPVPSTPPTPSPSTPPTPSPSCCHPR_Hex(1)HexNAc(1)	YXY_20200723_HF_HILIC_2ul_1	File25305 Spectrum12432 scans: 17574
P02671	TGSETESPRNPSSAGSWNSGSSGPGSTGNR	N18(Deamidated)	2903.000	3403.44	3	1135.49	2908.25	0.0204389	6.00537	2.4073e-19	198	8.338e-06	0.00146	494.1748	HexNAc(1)Neu5Ac(1)	P02671_TGSETESPRNPSSAGSWNSGSSGPGSTGNR_HexNAc(1)Neu5Ac(1)	YXY_20200723_HF_HILIC_2ul_1	File25305 Spectrum7977 scans: 12896
P02790	TPLPPTSAHGNVAEGETKPDPDVTER		2740.000	3079.43	2	1540.72	2714.31	-0.0123051	-3.99589	1.105e-18	197	5.74e-06	0.00146	365.1322	Hex(1)HexNAc(1)	P02790_TPLPPTSAHGNVAEGETKPDPDVTER_Hex(1)HexNAc(1)	YXY_20200723_HF_HILIC_2ul_1	File25305 Spectrum7029 scans: 11900
Q14624	IEETTMTTQTPAPIQAPSAILPLPGQSVER		4848.000	3831.88	3	1278.3	3175.64	0.0124907	3.25968	2.005e-18	196	1.905e-05	0.00146	656.2276	Hex(1)HexNAc(1)Neu5Ac(1)	Q14624_IEETTMTTQTPAPIQAPSAILPLPGQSVER_Hex(1)HexNAc(1)Neu5Ac(1)	YXY_20200723_HF_HILIC_2ul_1	File25305 Spectrum18749 scans: 24275
P02790	TPLPPTSAHGNVAEGETKPDPDVTER		3025.000	3370.55	3	1124.53	2714.31	0.0123185	3.65473	4.144e-15	192	0.0001331	0.00146	656.2276	Hex(1)HexNAc(1)Neu5Ac(1)	P02790_TPLPPTSAHGNVAEGETKPDPDVTER_Hex(1)HexNAc(1)Neu5Ac(1)	YXY_20200723_HF_HILIC_2ul_1	File25305 Spectrum8689 scans: 13644
P02765	TVVQPSVGAAAGPVVPPCPGR	C18(Carbamidomethyl)	4121.000	2671.3	2	1336.66	2015.06	0.00661716	2.47714	6.0513e-15	192	6.146e-05	0.00146	656.2276	Hex(1)HexNAc(1)Neu5Ac(1)	P02765_TVVQPSVGAAAGPVVPPCPGR_Hex(1)HexNAc(1)Neu5Ac(1)	YXY_20200723_HF_HILIC_2ul_1	File25305 Spectrum14767 scans: 20026
P02765	TVVQPSVGAAAGPVVPPCPGR	C18(Carbamidomethyl)	4096.000	2671.3	2	1336.66	2015.06	0.0138172	5.17244	7.5808e-16	192	0.0005292	0.00146	656.2276	Hex(1)HexNAc(1)Neu5Ac(1)	P02765_TVVQPSVGAAAGPVVPPCPGR_Hex(1)HexNAc(1)Neu5Ac(1)	YXY_20200723_HF_HILIC_2ul_1	File25305 Spectrum14627 scans: 19879
P02671	TGSETESPRNPSSAGSWNSGSSGPGSTGNR		2844.000	3402.46	3	1135.16	2907.26	0.0222545	6.54072	7.9537e-19	190	7.366e-06	0.00146	494.1748	HexNAc(1)Neu5Ac(1)	P02671_TGSETESPRNPSSAGSWNSGSSGPGSTGNR_HexNAc(1)Neu5Ac(1)	YXY_20200723_HF_HILIC_2ul_1	File25305 Spectrum7639 scans: 12541
P02790	TPLPPTSAHGNVAEGETKPDPDVTER		3117.000	3661.65	3	1221.56	2714.31	0.0147185	4.01962	3.6115e-15	190	0.0001302	0.00146	947.3230	Hex(1)HexNAc(1)Neu5Ac(2)	P02790_TPLPPTSAHGNVAEGETKPDPDVTER_Hex(1)HexNAc(1)Neu5Ac(2)	YXY_20200723_HF_HILIC_2ul_1	File25305 Spectrum9209 scans: 14190
P02765	TVVQPSVGAAAGPVVPPCPGR	C18(Carbamidomethyl)	4076.000	2671.3	4	668.831	2015.06	0.00586423	2.19528	1.2213e-14	188	0.0002203	0.00146	656.2276	Hex(1)HexNAc(1)Neu5Ac(1)	P02765_TVVQPSVGAAAGPVVPPCPGR_Hex(1)HexNAc(1)Neu5Ac(1)	YXY_20200723_HF_HILIC_2ul_1	File25305 Spectrum14512 scans: 19758
P02790	TPLPPTSAHGNVAEGETKPDPDVTER		2754.000	3079.46	3	1027.49	2714.31	0.00811846	2.63633	1.6866e-16	187	6.795e-05	0.00146	365.1322	Hex(1)HexNAc(1)	P02790_TPLPPTSAHGNVAEGETKPDPDVTER_Hex(1)HexNAc(1)	YXY_20200723_HF_HILIC_2ul_1	File25305 Spectrum7113 scans: 11989
P19827	TFVLSALQPSPTHSSSNTQR		4383.000	2813.31	4	704.336	2157.08	0.00464908	1.65253	6.9718e-12	185	0.0003766	0.00146	656.2276	Hex(1)HexNAc(1)Neu5Ac(1)	P19827_TFVLSALQPSPTHSSSNTQR_Hex(1)HexNAc(1)Neu5Ac(1)	YXY_20200723_HF_HILIC_2ul_1	File25305 Spectrum16220 scans: 21552
P02765	TVVQPSVGAAAGPVVPPCPGR	C18(Carbamidomethyl)	4101.000	2671.3	4	668.832	2015.06	0.00986423	3.69267	3.2306e-14	185	9.854e-05	0.00146	656.2276	Hex(1)HexNAc(1)Neu5Ac(1)	P02765_TVVQPSVGAAAGPVVPPCPGR_Hex(1)HexNAc(1)Neu5Ac(1)	YXY_20200723_HF_HILIC_2ul_1	File25305 Spectrum14653 scans: 19906
P02671	GGSTSYGTGSETESPRNPSSAGSWNSGSSGPGSTGNR	N25(Deamidated)	2974.000	4174.72	4	1044.69	3517.49	0.00300739	0.720381	1.9955e-14	184	0.0007806	0.00146	656.2276	Hex(1)HexNAc(1)Neu5Ac(1)	P02671_GGSTSYGTGSETESPRNPSSAGSWNSGSSGPGSTGNR_Hex(1)HexNAc(1)Neu5Ac(1)	YXY_20200723_HF_HILIC_2ul_1	File25305 Spectrum8395 scans: 13335
P02649	VQAAVGTSAAPVPSDNH		3031.000	2276.02	3	759.68	1619.79	0.000522241	0.229454	1.9035e-13	184	9.848e-05	0.00146	656.2276	Hex(1)HexNAc(1)Neu5Ac(1)	P02649_VQAAVGTSAAPVPSDNH_Hex(1)HexNAc(1)Neu5Ac(1)	YXY_20200723_HF_HILIC_2ul_1	File25305 Spectrum8725 scans: 13681
P02765	TVVQPSVGAAAGPVVPPCPGR	C18(Carbamidomethyl)	4115.000	2671.3	3	891.441	2015.06	0.0104407	3.90847	1.7307e-15	184	0.0003298	0.00146	656.2276	Hex(1)HexNAc(1)Neu5Ac(1)	P02765_TVVQPSVGAAAGPVVPPCPGR_Hex(1)HexNAc(1)Neu5Ac(1)	YXY_20200723_HF_HILIC_2ul_1	File25305 Spectrum14729 scans: 19986
P02790	TPLPPTSAHGNVAEGETKPDPDVTER		2977.000	3370.55	3	1124.52	2714.31	0.00691846	2.05262	3.4767e-15	183	3.582e-05	0.00146	656.2276	Hex(1)HexNAc(1)Neu5Ac(1)	P02790_TPLPPTSAHGNVAEGETKPDPDVTER_Hex(1)HexNAc(1)Neu5Ac(1)	YXY_20200723_HF_HILIC_2ul_1	File25305 Spectrum8409 scans: 13350
P02765	TVVQPSVGAAAGPVVPPCPGR	C18(Carbamidomethyl)	4066.000	2672.3	3	891.775	2015.06	0.0104721	3.91874	7.7958e-17	183	8.185e-05	0.00146	656.2276	Hex(1)HexNAc(1)Neu5Ac(1)	P02765_TVVQPSVGAAAGPVVPPCPGR_Hex(1)HexNAc(1)Neu5Ac(1)	YXY_20200723_HF_HILIC_2ul_1	File25305 Spectrum14457 scans: 19700
P02671	MADEAGSEADHEGTHSTK		1661.000	2527.99	4	633.004	1871.76	0.0017099	0.676386	1.0425e-11	182	0.0003866	0.00146	656.2276	Hex(1)HexNAc(1)Neu5Ac(1)	P02671_MADEAGSEADHEGTHSTK_Hex(1)HexNAc(1)Neu5Ac(1)	YXY_20200723_HF_HILIC_2ul_1	File25305 Spectrum914 scans: 5475
P19827	VLSALQPSPTHSSSNTQR		2953.000	2565.19	4	642.306	1908.97	0.00114149	0.444992	5.7993e-12	182	0.003936	0.00146	656.2276	Hex(1)HexNAc(1)Neu5Ac(1)	P19827_VLSALQPSPTHSSSNTQR_Hex(1)HexNAc(1)Neu5Ac(1)	YXY_20200723_HF_HILIC_2ul_1	File25305 Spectrum8270 scans: 13203
P02765	TVVQPSVGAAAGPVVPPCPGR	C18(Carbamidomethyl)	4089.000	2671.31	3	891.444	2015.06	0.0209407	7.83911	3.0531e-15	181	0.0003784	0.00146	656.2276	Hex(1)HexNAc(1)Neu5Ac(1)	P02765_TVVQPSVGAAAGPVVPPCPGR_Hex(1)HexNAc(1)Neu5Ac(1)	YXY_20200723_HF_HILIC_2ul_1	File25305 Spectrum14587 scans: 19837
P02790	TPLPPTSAHGNVAEGETKPDPDVTER		2802.000	3079.46	3	1027.49	2714.31	0.00931846	3.02601	4.1683e-17	181	1.417e-05	0.00146	365.1322	Hex(1)HexNAc(1)	P02790_TPLPPTSAHGNVAEGETKPDPDVTER_Hex(1)HexNAc(1)	YXY_20200723_HF_HILIC_2ul_1	File25305 Spectrum7393 scans: 12283
P02748	AQYTTSYDPELTESSGSASHIDCR	C23(Carbamidomethyl)	4057.000	3533.42	3	1178.81	2674.15	-0.030333	-8.58459	1.202e-13	180	0.0006751	0.00146	859.3070	Hex(1)HexNAc(2)Neu5Ac(1)	P02748_AQYTTSYDPELTESSGSASHIDCR_Hex(1)HexNAc(2)Neu5Ac(1)	YXY_20200723_HF_HILIC_2ul_1	File25305 Spectrum14409 scans: 19650
P0C0L5	GVAHNNLMAMAQETGDNLYWGSVTGSQSNAVSPTPAPR	Q12(Deamidated);N17(Deamidated)	4774.000	4878.15	5	976.638	3929.79	0.030884	6.33108	5.193e-19	179	2.261e-05	0.00146	947.3230	Hex(1)HexNAc(1)Neu5Ac(2)	P0C0L5_GVAHNNLMAMAQETGDNLYWGSVTGSQSNAVSPTPAPR_Hex(1)HexNAc(1)Neu5Ac(2)	YXY_20200723_HF_HILIC_2ul_1	File25305 Spectrum18354 scans: 23831
P05155	NPNATSSSSQDPESLQDRGEGK	N3(Deamidated)	2591.000	3251.34	3	1084.79	2304.01	0.00928033	2.85431	2.0848e-14	178	0.0008024	0.00146	947.3230	Hex(1)HexNAc(1)Neu5Ac(2)	P05155_NPNATSSSSQDPESLQDRGEGK_Hex(1)HexNAc(1)Neu5Ac(2)	YXY_20200723_HF_HILIC_2ul_1	File25305 Spectrum6174 scans: 10998
P01876	HYTNPSQDVTVPCPVPSTPPTPSPSTPPTPSPSCCHPR	C34(Carbamidomethyl);C35(Carbamidomethyl);Q7(Deamidated);C13(Carbamidomethyl)	3757.000	4503.02	4	1126.76	4136.87	0.0163757	3.63661	4.2687e-17	178	2.002e-05	0.00146	365.1322	Hex(1)HexNAc(1)	P01876_HYTNPSQDVTVPCPVPSTPPTPSPSTPPTPSPSCCHPR_Hex(1)HexNAc(1)	YXY_20200723_HF_HILIC_2ul_1	File25305 Spectrum12756 scans: 17914
P02790	TPLPPTSAHGNVAEGETKPDPDVTER		2953.000	3370.55	3	1124.52	2714.31	0.00931846	2.76467	3.4861e-14	177	0.0004573	0.00146	656.2276	Hex(1)HexNAc(1)Neu5Ac(1)	P02790_TPLPPTSAHGNVAEGETKPDPDVTER_Hex(1)HexNAc(1)Neu5Ac(1)	YXY_20200723_HF_HILIC_2ul_1	File25305 Spectrum8272 scans: 13206
P02671	GGSTSYGTGSETESPRNPSSAGSWNSGSSGPGSTGNR		2934.000	4172.73	4	1044.19	3516.5	0.00469162	1.12435	2.5574e-16	177	4.984e-05	0.00146	656.2276	Hex(1)HexNAc(1)Neu5Ac(1)	P02671_GGSTSYGTGSETESPRNPSSAGSWNSGSSGPGSTGNR_Hex(1)HexNAc(1)Neu5Ac(1)	YXY_20200723_HF_HILIC_2ul_1	File25305 Spectrum8159 scans: 13087
P0C0L5	APADLRGVAHNNLMAMAQETGDNLYWGSVTGSQSNAVSPTPAPR	N11(Deamidated);M14(Oxidation);Q18(Deamidated)	4314.000	4935.2	3	1646.07	4569.13	-0.0682872	-13.8368	5.5213e-19	175	3.831e-05	0.00146	365.1322	Hex(1)HexNAc(1)	P0C0L5_APADLRGVAHNNLMAMAQETGDNLYWGSVTGSQSNAVSPTPAPR_Hex(1)HexNAc(1)	YXY_20200723_HF_HILIC_2ul_1	File25305 Spectrum15838 scans: 21151
P02765	TVVQPSVGAAAGPVVPPCPGR	C18(Carbamidomethyl)	3882.000	2380.2	3	794.408	2015.06	0.0068407	2.874	3.2137e-13	174	0.0003111	0.00146	365.1322	Hex(1)HexNAc(1)	P02765_TVVQPSVGAAAGPVVPPCPGR_Hex(1)HexNAc(1)	YXY_20200723_HF_HILIC_2ul_1	File25305 Spectrum13444 scans: 18636
P01876	HYTNPSQDVTVPCPVPSTPPTPSPSTPPTPSPSCCHPR	C34(Carbamidomethyl);C35(Carbamidomethyl);C13(Carbamidomethyl)	3800.000	4338.97	4	1085.75	4135.88	0.00685994	1.58101	7.3093e-18	174	7.682e-06	0.00146	203.0794	HexNAc(1)	P01876_HYTNPSQDVTVPCPVPSTPPTPSPSTPPTPSPSCCHPR_HexNAc(1)	YXY_20200723_HF_HILIC_2ul_1	File25305 Spectrum12991 scans: 18161
P19827	TFVLSALQPSPTHSSSNTQR		4381.000	2814.32	2	1408.17	2157.08	0.00393337	1.39763	3.557e-13	174	0.0005674	0.00146	656.2276	Hex(1)HexNAc(1)Neu5Ac(1)	P19827_TFVLSALQPSPTHSSSNTQR_Hex(1)HexNAc(1)Neu5Ac(1)	YXY_20200723_HF_HILIC_2ul_1	File25305 Spectrum16210 scans: 21542
Q9NZP8	VQNHCQEPYYQAAAAGALTCATPGTWK	C5(Carbamidomethyl);C20(Carbamidomethyl)	4386.000	3940.71	3	1314.58	2992.36	0.0281913	7.15387	5.7304e-11	173	0.001668	0.00146	947.3230	Hex(1)HexNAc(1)Neu5Ac(2)	Q9NZP8_VQNHCQEPYYQAAAAGALTCATPGTWK_Hex(1)HexNAc(1)Neu5Ac(2)	YXY_20200723_HF_HILIC_2ul_1	File25305 Spectrum16236 scans: 21569
Q9UGM5	FVSVTCDFFESQAPATGSENSAVNQKPTNLPK	C6(Carbamidomethyl)	4621.000	4126.91	3	1376.64	3469.65	0.0334028	8.09391	6.28e-17	173	3.721e-05	0.00146	656.2276	Hex(1)HexNAc(1)Neu5Ac(1)	Q9UGM5_FVSVTCDFFESQAPATGSENSAVNQKPTNLPK_Hex(1)HexNAc(1)Neu5Ac(1)	YXY_20200723_HF_HILIC_2ul_1	File25305 Spectrum17528 scans: 22926
P02790	ATPLPPTSAHGNVAEGETKPDPDVTER		2955.000	3645.64	3	1216.22	2785.35	-0.024164	-6.62819	6.1299e-14	172	0.0003922	0.00146	859.3070	Hex(1)HexNAc(2)Neu5Ac(1)	P02790_ATPLPPTSAHGNVAEGETKPDPDVTER_Hex(1)HexNAc(2)Neu5Ac(1)	YXY_20200723_HF_HILIC_2ul_1	File25305 Spectrum8283 scans: 13217
P01876	HYTNPSQDVTVPCPVPSTPPTPSPSTPPTPSPSCCHPR	C34(Carbamidomethyl);C35(Carbamidomethyl);C13(Carbamidomethyl)	3746.000	4338.96	4	1085.75	4135.88	-0.00234006	-0.539315	1.6577e-18	172	3.232e-05	0.00146	203.0794	HexNAc(1)	P01876_HYTNPSQDVTVPCPVPSTPPTPSPSTPPTPSPSCCHPR_HexNAc(1)	YXY_20200723_HF_HILIC_2ul_1	File25305 Spectrum12692 scans: 17847
P02790	TPLPPTSAHGNVAEGETKPDPDVTER		3000.000	3370.55	3	1124.52	2714.31	0.00661846	1.96362	7.2222e-14	172	0.0006745	0.00146	656.2276	Hex(1)HexNAc(1)Neu5Ac(1)	P02790_TPLPPTSAHGNVAEGETKPDPDVTER_Hex(1)HexNAc(1)Neu5Ac(1)	YXY_20200723_HF_HILIC_2ul_1	File25305 Spectrum8549 scans: 13497
Q9NZP8	VQNHCQEPYYQAAAAGALTCATPGTWK	C5(Carbamidomethyl);C20(Carbamidomethyl)	4337.000	3649.6	3	1217.54	2992.36	0.00599134	1.64165	1.0965e-10	171	0.007118	0.00146	656.2276	Hex(1)HexNAc(1)Neu5Ac(1)	Q9NZP8_VQNHCQEPYYQAAAAGALTCATPGTWK_Hex(1)HexNAc(1)Neu5Ac(1)	YXY_20200723_HF_HILIC_2ul_1	File25305 Spectrum15967 scans: 21287
P0C0L5	GVAHNNLMAMAQETGDNLYWGSVTGSQSNAVSPTPAPR	Q12(Deamidated);N17(Deamidated)	4719.000	4587.05	4	1147.77	3929.79	0.0211605	4.61309	6.7666e-21	171	5.671e-06	0.00146	656.2276	Hex(1)HexNAc(1)Neu5Ac(1)	P0C0L5_GVAHNNLMAMAQETGDNLYWGSVTGSQSNAVSPTPAPR_Hex(1)HexNAc(1)Neu5Ac(1)	YXY_20200723_HF_HILIC_2ul_1	File25305 Spectrum18062 scans: 23497
Q14624	IEETTMTTQTPAPIQAPSAILPLPGQSVER	M6(Oxidation);Q9(Deamidated)	4848.000	3849.91	3	1284.31	3192.62	0.0540919	14.0502	1.5697e-16	171	6.652e-05	0.00146	656.2276	Hex(1)HexNAc(1)Neu5Ac(1)	Q14624_IEETTMTTQTPAPIQAPSAILPLPGQSVER_Hex(1)HexNAc(1)Neu5Ac(1)	YXY_20200723_HF_HILIC_2ul_1	File25305 Spectrum18750 scans: 24276
P02790	TPLPPTSAHGNVAEGETKPDPDVTER	N11(Deamidated)	3075.000	3372.54	3	1125.19	2715.3	0.0150342	4.45783	3.223e-15	170	6.84e-05	0.00146	656.2276	Hex(1)HexNAc(1)Neu5Ac(1)	P02790_TPLPPTSAHGNVAEGETKPDPDVTER_Hex(1)HexNAc(1)Neu5Ac(1)	YXY_20200723_HF_HILIC_2ul_1	File25305 Spectrum8969 scans: 13938
P0C0L5	GVAHNNLMAMAQETGDNLYWGSVTGSQSNAVSPTPAPR	Q12(Deamidated);N17(Deamidated)	4776.000	4878.17	6	814.035	3929.79	0.0450075	9.22632	6.257e-17	170	4.506e-05	0.00146	947.3230	Hex(1)HexNAc(1)Neu5Ac(2)	P0C0L5_GVAHNNLMAMAQETGDNLYWGSVTGSQSNAVSPTPAPR_Hex(1)HexNAc(1)Neu5Ac(2)	YXY_20200723_HF_HILIC_2ul_1	File25305 Spectrum18366 scans: 23845
Q16610	GQGEQGSTGGTNISSTSEPKEE		2447.000	3126.28	3	1043.1	2178.95	0.0026922	0.861154	1.7816e-12	170	0.0004871	0.00146	947.3230	Hex(1)HexNAc(1)Neu5Ac(2)	Q16610_GQGEQGSTGGTNISSTSEPKEE_Hex(1)HexNAc(1)Neu5Ac(2)	YXY_20200723_HF_HILIC_2ul_1	File25305 Spectrum5353 scans: 10136
P04004	QCDELCSYYQSCCTDYTAECKPQVTR	C2(Carbamidomethyl);C6(Carbamidomethyl);C12(Carbamidomethyl);C13(Carbamidomethyl);C20(Carbamidomethyl)	4047.000	3525.34	3	1176.12	3321.31	-0.0531164	-15.067	3.5616e-18	170	4.355e-05	0.00146	203.0794	HexNAc(1)	P04004_QCDELCSYYQSCCTDYTAECKPQVTR_HexNAc(1)	YXY_20200723_HF_HILIC_2ul_1	File25305 Spectrum14355 scans: 19593
P00747	IPSCDSSPVSTEQLAPTAPPELTPVVQDCYHGDGQSYR	C4(Carbamidomethyl);Q13(Deamidated);C29(Carbamidomethyl)	4587.000	4816.17	4	1205.05	4158.88	0.0633712	13.158	1.1453e-15	169	0.0001365	0.00146	656.2276	Hex(1)HexNAc(1)Neu5Ac(1)	P00747_IPSCDSSPVSTEQLAPTAPPELTPVVQDCYHGDGQSYR_Hex(1)HexNAc(1)Neu5Ac(1)	YXY_20200723_HF_HILIC_2ul_1	File25305 Spectrum17341 scans: 22730
P19827	TFVLSALQPSPTHSSSNTQR		4405.000	2813.32	3	938.78	2157.08	0.00882554	3.13706	3.8534e-12	169	0.003434	0.00146	656.2276	Hex(1)HexNAc(1)Neu5Ac(1)	P19827_TFVLSALQPSPTHSSSNTQR_Hex(1)HexNAc(1)Neu5Ac(1)	YXY_20200723_HF_HILIC_2ul_1	File25305 Spectrum16342 scans: 21681
P02765	TVVQPSVGAAAGPVVPPCPGR	C18(Carbamidomethyl)	4228.000	2962.41	3	988.478	2015.06	0.0257407	8.6891	9.0479e-11	168	0.0007412	0.00146	947.3230	Hex(1)HexNAc(1)Neu5Ac(2)	P02765_TVVQPSVGAAAGPVVPPCPGR_Hex(1)HexNAc(1)Neu5Ac(2)	YXY_20200723_HF_HILIC_2ul_1	File25305 Spectrum15358 scans: 20646
Q96PD5	DGSPDVTTADIGANTPDATK		3393.000	2892.23	2	1447.12	1944.89	0.0180028	6.22453	1.2208e-12	168	0.000285	0.00146	947.3230	Hex(1)HexNAc(1)Neu5Ac(2)	Q96PD5_DGSPDVTTADIGANTPDATK_Hex(1)HexNAc(1)Neu5Ac(2)	YXY_20200723_HF_HILIC_2ul_1	File25305 Spectrum10737 scans: 15794
P02790	IATPLPPTSAHGNVAEGETKPDPDVTER		2895.000	3409.56	3	1137.53	2898.44	-0.0629593	-18.4655	3.6243e-14	168	0.000864	0.00146	511.1901	Fuc(1)Hex(1)HexNAc(1)	P02790_IATPLPPTSAHGNVAEGETKPDPDVTER_Fuc(1)Hex(1)HexNAc(1)	YXY_20200723_HF_HILIC_2ul_1	File25305 Spectrum7933 scans: 12850
P00747	IPSCDSSPVSTEQLAPTAPPELTPVVQDCYHGDGQSYR	C4(Carbamidomethyl);Q13(Deamidated);C29(Carbamidomethyl)	4563.000	4816.18	4	1205.05	4158.88	0.0705712	14.6529	2.2466e-17	167	8.156e-05	0.00146	656.2276	Hex(1)HexNAc(1)Neu5Ac(1)	P00747_IPSCDSSPVSTEQLAPTAPPELTPVVQDCYHGDGQSYR_Hex(1)HexNAc(1)Neu5Ac(1)	YXY_20200723_HF_HILIC_2ul_1	File25305 Spectrum17211 scans: 22593
P02790	TPLPPTSAHGNVAEGETKPDPDVTER		3091.000	3661.65	3	1221.56	2714.31	0.0141185	3.85576	1.3128e-13	167	0.001132	0.00146	947.3230	Hex(1)HexNAc(1)Neu5Ac(2)	P02790_TPLPPTSAHGNVAEGETKPDPDVTER_Hex(1)HexNAc(1)Neu5Ac(2)	YXY_20200723_HF_HILIC_2ul_1	File25305 Spectrum9059 scans: 14032
P05155	NATSSSSQDPESLQDRGEGK	N1(Deamidated)	2412.000	2749.14	3	917.388	2092.91	0.000671657	0.244315	1.9988e-10	166	0.00581	0.00146	656.2276	Hex(1)HexNAc(1)Neu5Ac(1)	P05155_NATSSSSQDPESLQDRGEGK_Hex(1)HexNAc(1)Neu5Ac(1)	YXY_20200723_HF_HILIC_2ul_1	File25305 Spectrum5154 scans: 9927
P02765	TVVQPSVGAAAGPVVPPCPGR	C18(Carbamidomethyl)	4265.000	2962.39	4	741.604	2015.06	0.00126423	0.426761	2.9204e-10	165	0.001822	0.00146	947.3230	Hex(1)HexNAc(1)Neu5Ac(2)	P02765_TVVQPSVGAAAGPVVPPCPGR_Hex(1)HexNAc(1)Neu5Ac(2)	YXY_20200723_HF_HILIC_2ul_1	File25305 Spectrum15563 scans: 20861
P02790	TPLPPTSAHGNVAEGETKPDPDVTER		3114.000	3662.66	4	916.672	2714.31	0.0186734	5.09831	3.5838e-13	165	0.0003404	0.00146	947.3230	Hex(1)HexNAc(1)Neu5Ac(2)	P02790_TPLPPTSAHGNVAEGETKPDPDVTER_Hex(1)HexNAc(1)Neu5Ac(2)	YXY_20200723_HF_HILIC_2ul_1	File25305 Spectrum9189 scans: 14169
P02671	HRHPDEAAFFDTASTGK		3078.000	2833.2	4	709.307	1885.87	0.00677017	2.38958	9.0074e-13	165	0.0003886	0.00146	947.3230	Hex(1)HexNAc(1)Neu5Ac(2)	P02671_HRHPDEAAFFDTASTGK_Hex(1)HexNAc(1)Neu5Ac(2)	YXY_20200723_HF_HILIC_2ul_1	File25305 Spectrum8988 scans: 13957
P02649	VQAAVGTSAAPVPSDNH		3097.000	2276.02	3	759.681	1619.79	0.00292224	1.28393	5.2359e-13	165	0.001048	0.00146	656.2276	Hex(1)HexNAc(1)Neu5Ac(1)	P02649_VQAAVGTSAAPVPSDNH_Hex(1)HexNAc(1)Neu5Ac(1)	YXY_20200723_HF_HILIC_2ul_1	File25305 Spectrum9094 scans: 14069
Q16610	GQGEQGSTGGTNISSTSEPKEE		2398.000	3127.29	3	1043.44	2178.95	0.0171236	5.47552	1.4775e-12	164	0.001742	0.00146	947.3230	Hex(1)HexNAc(1)Neu5Ac(2)	Q16610_GQGEQGSTGGTNISSTSEPKEE_Hex(1)HexNAc(1)Neu5Ac(2)	YXY_20200723_HF_HILIC_2ul_1	File25305 Spectrum5071 scans: 9839
P22891	PCISQPCLHNGSCQDSIWGYTCTCSPGYEGSNCELAK	C33(Carbamidomethyl);C2(Carbamidomethyl);Q5(Deamidated);C7(Carbamidomethyl);N10(Deamidated);C13(Carbamidomethyl);C22(Carbamidomethyl);C24(Carbamidomethyl)	4356.000	4806.91	3	1603.31	4294.71	0.00861711	1.79265	1.5926e-17	164	1.616e-05	0.00146	511.1901	Fuc(1)Hex(1)HexNAc(1)	P22891_PCISQPCLHNGSCQDSIWGYTCTCSPGYEGSNCELAK_Fuc(1)Hex(1)HexNAc(1)	YXY_20200723_HF_HILIC_2ul_1	File25305 Spectrum16072 scans: 21397
P0C0L5	APADLRGVAHNNLMAMAQETGDNLYWGSVTGSQSNAVSPTPAPR	N11(Deamidated);N12(Deamidated);M14(Oxidation)	4429.000	4934.18	4	1234.55	4569.13	-0.0837951	-16.9826	2.1492e-14	164	0.003184	0.00146	365.1322	Hex(1)HexNAc(1)	P0C0L5_APADLRGVAHNNLMAMAQETGDNLYWGSVTGSQSNAVSPTPAPR_Hex(1)HexNAc(1)	YXY_20200723_HF_HILIC_2ul_1	File25305 Spectrum16474 scans: 21819
P02790	TPLPPTSAHGNVAEGETKPDPDVTER		2929.000	3370.55	3	1124.52	2714.31	0.00721846	2.14163	1.2164e-11	164	0.000849	0.00146	656.2276	Hex(1)HexNAc(1)Neu5Ac(1)	P02790_TPLPPTSAHGNVAEGETKPDPDVTER_Hex(1)HexNAc(1)Neu5Ac(1)	YXY_20200723_HF_HILIC_2ul_1	File25305 Spectrum8133 scans: 13060
P02671	TSYGTGSETESPRNPSSAGSWNSGSSGPGSTGNR		2934.000	4175.75	3	1392.92	3315.43	0.0148553	3.55752	7.3495e-17	164	2.703e-05	0.00146	859.3070	Hex(1)HexNAc(2)Neu5Ac(1)	P02671_TSYGTGSETESPRNPSSAGSWNSGSSGPGSTGNR_Hex(1)HexNAc(2)Neu5Ac(1)	YXY_20200723_HF_HILIC_2ul_1	File25305 Spectrum8160 scans: 13088
P05155	NPNATSSSSQDPESLQDRGEGK	N3(Deamidated)	2229.000	2669.15	2	1335.58	2304.01	0.0058568	2.19426	1.2215e-12	163	0.0001907	0.00146	365.1322	Hex(1)HexNAc(1)	P05155_NPNATSSSSQDPESLQDRGEGK_Hex(1)HexNAc(1)	YXY_20200723_HF_HILIC_2ul_1	File25305 Spectrum4115 scans: 8836
P0C0L4	LGVAHNNLMAMAQETGDNLYWGSVTGSQSNAVSPTPAPR	N6(Deamidated);M9(Oxidation);M11(Oxidation)	4669.000	4568.07	3	1523.7	4073.88	0.00962791	2.10765	3.76e-16	163	0.0001519	0.00146	494.1748	HexNAc(1)Neu5Ac(1)	P0C0L4_LGVAHNNLMAMAQETGDNLYWGSVTGSQSNAVSPTPAPR_HexNAc(1)Neu5Ac(1)	YXY_20200723_HF_HILIC_2ul_1	File25305 Spectrum17796 scans: 23207
P02765	TVVQPSVGAAAGPVVPPCPGR	C18(Carbamidomethyl)	4251.000	2962.41	3	988.476	2015.06	0.0200407	6.76501	3.8747e-12	162	0.001764	0.00146	947.3230	Hex(1)HexNAc(1)Neu5Ac(2)	P02765_TVVQPSVGAAAGPVVPPCPGR_Hex(1)HexNAc(1)Neu5Ac(2)	YXY_20200723_HF_HILIC_2ul_1	File25305 Spectrum15487 scans: 20782
P05155	SSNPNATSSSSQDPESLQDRGEGK	N5(Deamidated)	2431.000	3134.31	3	1045.78	2478.07	0.0100235	3.19799	2.2079e-11	162	0.0005657	0.00146	656.2276	Hex(1)HexNAc(1)Neu5Ac(1)	P05155_SSNPNATSSSSQDPESLQDRGEGK_Hex(1)HexNAc(1)Neu5Ac(1)	YXY_20200723_HF_HILIC_2ul_1	File25305 Spectrum5262 scans: 10040
P01876	HYTNPSQDVTVPCPVPSTPPTPSPSTPPTPSPSCCHPR	C34(Carbamidomethyl);C35(Carbamidomethyl);C13(Carbamidomethyl)	3743.000	4542.06	4	1136.52	4135.88	0.0155599	3.42575	4.03e-14	162	0.0001628	0.00146	406.1587	HexNAc(2)	P01876_HYTNPSQDVTVPCPVPSTPPTPSPSTPPTPSPSCCHPR_HexNAc(2)	YXY_20200723_HF_HILIC_2ul_1	File25305 Spectrum12673 scans: 17827
P0C0L5	APADLRGVAHNNLMAMAQETGDNLYWGSVTGSQSNAVSPTPAPR	N11(Deamidated);M14(Oxidation);M16(Oxidation)	3646.000	4990.21	5	999.05	4584.14	-0.0843706	-16.9072	4.3535e-18	162	7.151e-05	0.00146	406.1587	HexNAc(2)	P0C0L5_APADLRGVAHNNLMAMAQETGDNLYWGSVTGSQSNAVSPTPAPR_HexNAc(2)	YXY_20200723_HF_HILIC_2ul_1	File25305 Spectrum12139 scans: 17266
P02649	VQAAVGTSAAPVPSDNH		3061.000	2276.03	3	759.683	1619.79	0.00802224	3.52467	2.7247e-12	162	0.000278	0.00146	656.2276	Hex(1)HexNAc(1)Neu5Ac(1)	P02649_VQAAVGTSAAPVPSDNH_Hex(1)HexNAc(1)Neu5Ac(1)	YXY_20200723_HF_HILIC_2ul_1	File25305 Spectrum8893 scans: 13858
P01876	HYTNPSQDVTVPCPVPSTPPTPSPSTPPTPSPSCCHPR	C34(Carbamidomethyl);C35(Carbamidomethyl);Q7(Deamidated);C13(Carbamidomethyl)	3704.000	4503.02	5	901.612	4136.87	0.0228992	5.0853	1.1866e-13	161	0.0003885	0.00146	365.1322	Hex(1)HexNAc(1)	P01876_HYTNPSQDVTVPCPVPSTPPTPSPSTPPTPSPSCCHPR_Hex(1)HexNAc(1)	YXY_20200723_HF_HILIC_2ul_1	File25305 Spectrum12457 scans: 17600
P02787	QLCPGCGCSTLNQYFGYSGAFK	Q1(Deamidated);C3(Carbamidomethyl);C6(Carbamidomethyl);C8(Carbamidomethyl)	5145.000	4339.78	3	1447.6	2515.06	0.0708506	16.3259	2.3929e-14	161	0.0002741	0.00146	1823.6453	Fuc(1)Hex(3)HexNAc(3)Neu5Ac(2)	P02787_QLCPGCGCSTLNQYFGYSGAFK_Fuc(1)Hex(3)HexNAc(3)Neu5Ac(2)	YXY_20200723_HF_HILIC_2ul_1	File25305 Spectrum20339 scans: 26021
P02765	TVVQPSVGAAAGPVVPPCPGR	C18(Carbamidomethyl)	4235.000	2962.42	2	1482.22	2015.06	0.0340172	11.4829	2.1196e-11	161	0.001912	0.00146	947.3230	Hex(1)HexNAc(1)Neu5Ac(2)	P02765_TVVQPSVGAAAGPVVPPCPGR_Hex(1)HexNAc(1)Neu5Ac(2)	YXY_20200723_HF_HILIC_2ul_1	File25305 Spectrum15400 scans: 20690
P02790	TPLPPTSAHGNVAEGETKPDPDVTER	N11(Deamidated)	3050.000	3371.55	3	1124.86	2715.3	0.0207029	6.14047	1.2249e-11	161	0.0007557	0.00146	656.2276	Hex(1)HexNAc(1)Neu5Ac(1)	P02790_TPLPPTSAHGNVAEGETKPDPDVTER_Hex(1)HexNAc(1)Neu5Ac(1)	YXY_20200723_HF_HILIC_2ul_1	File25305 Spectrum8829 scans: 13791
P0C0L5	APADLRGVAHNNLMAMAQETGDNLYWGSVTGSQSNAVSPTPAPR	M16(Oxidation);N23(Deamidated)	4308.000	4934.2	4	1234.56	4568.14	-0.0834481	-16.9122	1.6831e-17	159	8.959e-05	0.00146	365.1322	Hex(1)HexNAc(1)	P0C0L5_APADLRGVAHNNLMAMAQETGDNLYWGSVTGSQSNAVSPTPAPR_Hex(1)HexNAc(1)	YXY_20200723_HF_HILIC_2ul_1	File25305 Spectrum15803 scans: 21115
P05155	NPNATSSSSQDPESLQDRGEGK	N3(Deamidated)	2389.000	2960.25	3	987.756	2304.01	0.00988033	3.33767	6.7184e-11	159	0.0003857	0.00146	656.2276	Hex(1)HexNAc(1)Neu5Ac(1)	P05155_NPNATSSSSQDPESLQDRGEGK_Hex(1)HexNAc(1)Neu5Ac(1)	YXY_20200723_HF_HILIC_2ul_1	File25305 Spectrum5019 scans: 9785
P19827	VLSALQPSPTHSSSNTQR		2641.000	2274.1	3	759.041	1908.97	0.00361796	1.59094	6.1617e-11	159	0.0004827	0.00146	365.1322	Hex(1)HexNAc(1)	P19827_VLSALQPSPTHSSSNTQR_Hex(1)HexNAc(1)	YXY_20200723_HF_HILIC_2ul_1	File25305 Spectrum6454 scans: 11292
P0C0L4	APVDLLGVAHNNLMAMAQETGDNLYWGSVTGSQSNAVSPTPAPR	M14(Oxidation);M16(Oxidation);N23(Deamidated)	4308.000	4934.2	4	1234.56	4569.15	-0.0897472	-18.1888	1.6831e-17	159	0.0001846	0.00146	365.1322	Hex(1)HexNAc(1)	P0C0L4_APVDLLGVAHNNLMAMAQETGDNLYWGSVTGSQSNAVSPTPAPR_Hex(1)HexNAc(1)	YXY_20200723_HF_HILIC_2ul_1	File25305 Spectrum15803 scans: 21115
P49747	PDQADVDHDFVGDACDSDQDQDGDGHQDSR	C15(Carbamidomethyl)	3050.000	3518.34	3	1173.79	3315.25	0.0130579	3.71138	5.0351e-15	158	3.184e-05	0.00146	203.0794	HexNAc(1)	P49747_PDQADVDHDFVGDACDSDQDQDGDGHQDSR_HexNAc(1)	YXY_20200723_HF_HILIC_2ul_1	File25305 Spectrum8831 scans: 13793
P05155	ASSNPNATSSSSQDPESLQDRGEGK	N6(Deamidated)	2434.000	3205.34	3	1069.45	2549.11	-0.00329031	-1.02651	1.3038e-11	158	0.0008593	0.00146	656.2276	Hex(1)HexNAc(1)Neu5Ac(1)	P05155_ASSNPNATSSSSQDPESLQDRGEGK_Hex(1)HexNAc(1)Neu5Ac(1)	YXY_20200723_HF_HILIC_2ul_1	File25305 Spectrum5276 scans: 10055
P05155	NPNATSSSSQDPESLQDRGEGK	N3(Deamidated)	2444.000	2960.25	3	987.756	2304.01	0.00988033	3.33767	6.1312e-11	157	0.0006511	0.00146	656.2276	Hex(1)HexNAc(1)Neu5Ac(1)	P05155_NPNATSSSSQDPESLQDRGEGK_Hex(1)HexNAc(1)Neu5Ac(1)	YXY_20200723_HF_HILIC_2ul_1	File25305 Spectrum5332 scans: 10114
P02790	LPPTSAHGNVAEGETKPDPDVTER		2812.000	3172.45	3	1058.49	2516.21	0.00686081	2.16262	5.4537e-13	157	0.0001498	0.00146	656.2276	Hex(1)HexNAc(1)Neu5Ac(1)	P02790_LPPTSAHGNVAEGETKPDPDVTER_Hex(1)HexNAc(1)Neu5Ac(1)	YXY_20200723_HF_HILIC_2ul_1	File25305 Spectrum7453 scans: 12346
P02649	VQAAVGTSAAPVPSDNH		3100.000	2276.02	2	1139.02	1619.79	0.00409871	1.80082	2.5496e-12	155	0.000679	0.00146	656.2276	Hex(1)HexNAc(1)Neu5Ac(1)	P02649_VQAAVGTSAAPVPSDNH_Hex(1)HexNAc(1)Neu5Ac(1)	YXY_20200723_HF_HILIC_2ul_1	File25305 Spectrum9111 scans: 14087
Q16610	GQGEQGSTGGTNISSTSEPKEE		2285.000	2835.18	3	946.068	2178.95	0.0023922	0.843757	4.6106e-12	155	0.0005256	0.00146	656.2276	Hex(1)HexNAc(1)Neu5Ac(1)	Q16610_GQGEQGSTGGTNISSTSEPKEE_Hex(1)HexNAc(1)Neu5Ac(1)	YXY_20200723_HF_HILIC_2ul_1	File25305 Spectrum4425 scans: 9161
P02790	TPLPPTSAHGNVAEGETKPDPDVTER		2768.000	3080.46	2	1541.24	2714.31	0.0126263	4.09883	1.7566e-14	155	0.0003473	0.00146	365.1322	Hex(1)HexNAc(1)	P02790_TPLPPTSAHGNVAEGETKPDPDVTER_Hex(1)HexNAc(1)	YXY_20200723_HF_HILIC_2ul_1	File25305 Spectrum7191 scans: 12070
P02671	GNEITRGGSTSYGTGSETESPRNPSSAGSWNSGSSGPGSTGNR	N2(Deamidated);N23(Deamidated)	2516.000	4554.98	4	1139.75	4188.81	0.032154	7.05909	3.2667e-11	155	0.0009477	0.00146	365.1322	Hex(1)HexNAc(1)	P02671_GNEITRGGSTSYGTGSETESPRNPSSAGSWNSGSSGPGSTGNR_Hex(1)HexNAc(1)	YXY_20200723_HF_HILIC_2ul_1	File25305 Spectrum5744 scans: 10546
P0C0L5	GVAHNNLMAMAQETGDNLYWGSVTGSQSNAVSPTPAPR	Q12(Deamidated)	4721.000	4586.04	5	918.215	3928.81	-0.00270042	-0.588835	4.0762e-16	155	6.175e-05	0.00146	656.2276	Hex(1)HexNAc(1)Neu5Ac(1)	P0C0L5_GVAHNNLMAMAQETGDNLYWGSVTGSQSNAVSPTPAPR_Hex(1)HexNAc(1)Neu5Ac(1)	YXY_20200723_HF_HILIC_2ul_1	File25305 Spectrum18076 scans: 23513
P03952	LCNTGDNSVCTTK	C2(Carbamidomethyl);C10(Carbamidomethyl)	2208.000	2124.86	2	1063.44	1468.63	0.00301937	1.42097	1.3755e-09	154	0.00457	0.00146	656.2276	Hex(1)HexNAc(1)Neu5Ac(1)	P03952_LCNTGDNSVCTTK_Hex(1)HexNAc(1)Neu5Ac(1)	YXY_20200723_HF_HILIC_2ul_1	File25305 Spectrum3994 scans: 8709
P0C0L5	APADLRGVAHNNLMAMAQETGDNLYWGSVTGSQSNAVSPTPAPR	M14(Oxidation);M16(Oxidation);Q18(Deamidated)	4102.000	4950.2	4	1238.56	4584.14	-0.0763627	-15.4262	2.2878e-14	154	0.0003775	0.00146	365.1322	Hex(1)HexNAc(1)	P0C0L5_APADLRGVAHNNLMAMAQETGDNLYWGSVTGSQSNAVSPTPAPR_Hex(1)HexNAc(1)	YXY_20200723_HF_HILIC_2ul_1	File25305 Spectrum14658 scans: 19911
P19827	VLSALQPSPTHSSSNTQR		3224.000	2856.29	3	953.105	1908.97	0.00331796	1.16163	1.4903e-11	154	0.002586	0.00146	947.3230	Hex(1)HexNAc(1)Neu5Ac(2)	P19827_VLSALQPSPTHSSSNTQR_Hex(1)HexNAc(1)Neu5Ac(2)	YXY_20200723_HF_HILIC_2ul_1	File25305 Spectrum9810 scans: 14821
P0C0L5	APADLRGVAHNNLMAMAQETGDNLYWGSVTGSQSNAVSPTPAPR	N12(Deamidated);M14(Oxidation);N23(Deamidated)	4384.000	4934.19	4	1234.56	4569.13	-0.0685951	-13.902	2.4102e-14	153	0.0002899	0.00146	365.1322	Hex(1)HexNAc(1)	P0C0L5_APADLRGVAHNNLMAMAQETGDNLYWGSVTGSQSNAVSPTPAPR_Hex(1)HexNAc(1)	YXY_20200723_HF_HILIC_2ul_1	File25305 Spectrum16226 scans: 21559
P02765	TVVQPSVGAAAGPVVPPCPGR	Q4(Deamidated);C18(Carbamidomethyl)	4238.000	2964.4	4	742.108	2016.05	0.03078	10.3832	2.1061e-08	153	0.0298	0.00146	947.3230	Hex(1)HexNAc(1)Neu5Ac(2)	P02765_TVVQPSVGAAAGPVVPPCPGR_Hex(1)HexNAc(1)Neu5Ac(2)	YXY_20200723_HF_HILIC_2ul_1	File25305 Spectrum15415 scans: 20706
P0C0L5	APADLRGVAHNNLMAMAQETGDNLYWGSVTGSQSNAVSPTPAPR	N11(Deamidated);M14(Oxidation);M16(Oxidation)	4256.000	4950.18	4	1238.55	4584.14	-0.0963627	-19.4665	1.4424e-14	153	0.0004726	0.00146	365.1322	Hex(1)HexNAc(1)	P0C0L5_APADLRGVAHNNLMAMAQETGDNLYWGSVTGSQSNAVSPTPAPR_Hex(1)HexNAc(1)	YXY_20200723_HF_HILIC_2ul_1	File25305 Spectrum15514 scans: 20810
P0C0L5	APADLRGVAHNNLMAMAQETGDNLYWGSVTGSQSNAVSPTPAPR	N11(Deamidated);M14(Oxidation);M16(Oxidation)	4163.000	4950.19	4	1238.55	4584.14	-0.0863627	-17.4464	7.6038e-14	153	0.00101	0.00146	365.1322	Hex(1)HexNAc(1)	P0C0L5_APADLRGVAHNNLMAMAQETGDNLYWGSVTGSQSNAVSPTPAPR_Hex(1)HexNAc(1)	YXY_20200723_HF_HILIC_2ul_1	File25305 Spectrum14998 scans: 20268
P01834	QSGNSQESVTEQDSKDSTYSLSSTLTLSK		4280.000	3618.69	3	1207.24	3106.44	0.0572109	15.8098	1.5024e-15	153	8.029e-05	0.00146	511.1901	Fuc(1)Hex(1)HexNAc(1)	P01834_QSGNSQESVTEQDSKDSTYSLSSTLTLSK_Fuc(1)Hex(1)HexNAc(1)	YXY_20200723_HF_HILIC_2ul_1	File25305 Spectrum15650 scans: 20953
P19827	TFVLSALQPSPTHSSSNTQR		4380.000	2813.32	3	938.78	2157.08	0.0103255	3.67023	3.4824e-12	152	0.0004932	0.00146	656.2276	Hex(1)HexNAc(1)Neu5Ac(1)	P19827_TFVLSALQPSPTHSSSNTQR_Hex(1)HexNAc(1)Neu5Ac(1)	YXY_20200723_HF_HILIC_2ul_1	File25305 Spectrum16203 scans: 21535
P05155	NPNATSSSSQDPESLQDRGEGK	N3(Deamidated)	2250.000	2669.15	3	890.724	2304.01	0.00748033	2.80252	3.1139e-09	152	0.001733	0.00146	365.1322	Hex(1)HexNAc(1)	P05155_NPNATSSSSQDPESLQDRGEGK_Hex(1)HexNAc(1)	YXY_20200723_HF_HILIC_2ul_1	File25305 Spectrum4233 scans: 8960
P02671	KMADEAGSEADHEGTHSTK	M2(Oxidation)	1640.000	2509.98	3	837.666	2015.85	-0.0479913	-19.1202	2.2824e-09	151	0.06275	0.00146	494.1748	HexNAc(1)Neu5Ac(1)	P02671_KMADEAGSEADHEGTHSTK_HexNAc(1)Neu5Ac(1)	YXY_20200723_HF_HILIC_2ul_1	File25305 Spectrum787 scans: 5341
P19827	VLSALQPSPTHSSSNTQR		2950.000	2565.19	3	856.071	1908.97	-0.000882043	-0.343851	2.4177e-11	151	0.001737	0.00146	656.2276	Hex(1)HexNAc(1)Neu5Ac(1)	P19827_VLSALQPSPTHSSSNTQR_Hex(1)HexNAc(1)Neu5Ac(1)	YXY_20200723_HF_HILIC_2ul_1	File25305 Spectrum8254 scans: 13187
Q14624	KIEETTMTTQTPAPIQAPSAILPLPGQSVER	M7(Oxidation);Q10(Deamidated)	4848.000	3831.89	4	958.979	3320.72	-0.020979	-5.47485	1.0764e-13	151	0.001183	0.00146	511.1901	Fuc(1)Hex(1)HexNAc(1)	Q14624_KIEETTMTTQTPAPIQAPSAILPLPGQSVER_Fuc(1)Hex(1)HexNAc(1)	YXY_20200723_HF_HILIC_2ul_1	File25305 Spectrum18748 scans: 24274
P02671	MADEAGSEADHEGTHSTK		1683.000	2527.99	3	843.67	1871.76	0.00168636	0.667077	5.118e-11	151	0.0005622	0.00146	656.2276	Hex(1)HexNAc(1)Neu5Ac(1)	P02671_MADEAGSEADHEGTHSTK_Hex(1)HexNAc(1)Neu5Ac(1)	YXY_20200723_HF_HILIC_2ul_1	File25305 Spectrum1041 scans: 5608
P05155	NPNATSSSSQDPESLQDRGEGK	N1(Deamidated);N3(Deamidated)	2594.000	3253.35	4	814.344	2304.99	0.0284196	8.7355	1.173e-09	150	0.01639	0.00146	947.3230	Hex(1)HexNAc(1)Neu5Ac(2)	P05155_NPNATSSSSQDPESLQDRGEGK_Hex(1)HexNAc(1)Neu5Ac(2)	YXY_20200723_HF_HILIC_2ul_1	File25305 Spectrum6190 scans: 11014
P04004	SYYQSCCTDYTAECKPQVTR	Q4(Deamidated);C6(Carbamidomethyl);C7(Carbamidomethyl);C14(Carbamidomethyl)	4189.000	3465.35	3	1156.12	2517.02	-0.000657864	-0.189841	2.5955e-09	150	0.01077	0.00146	947.3230	Hex(1)HexNAc(1)Neu5Ac(2)	P04004_SYYQSCCTDYTAECKPQVTR_Hex(1)HexNAc(1)Neu5Ac(2)	YXY_20200723_HF_HILIC_2ul_1	File25305 Spectrum15142 scans: 20419
P12259	APSHQQATTAGSPLR		2363.000	2177	3	726.673	1520.77	0.00121729	0.559158	7.6618e-10	150	0.002441	0.00146	656.2276	Hex(1)HexNAc(1)Neu5Ac(1)	P12259_APSHQQATTAGSPLR_Hex(1)HexNAc(1)Neu5Ac(1)	YXY_20200723_HF_HILIC_2ul_1	File25305 Spectrum4875 scans: 9634
P19827	VLSALQPSPTHSSSNTQR		2645.000	2274.1	2	1138.06	1908.97	0.00709442	3.11966	5.7973e-12	150	0.00039	0.00146	365.1322	Hex(1)HexNAc(1)	P19827_VLSALQPSPTHSSSNTQR_Hex(1)HexNAc(1)	YXY_20200723_HF_HILIC_2ul_1	File25305 Spectrum6476 scans: 11315
P05155	SSNPNATSSSSQDPESLQDRGEGK	N5(Deamidated)	2527.000	2989.25	2	1495.63	2478.07	-0.0187001	-6.25578	3.5072e-11	149	0.001773	0.00146	511.1901	Fuc(1)Hex(1)HexNAc(1)	P05155_SSNPNATSSSSQDPESLQDRGEGK_Fuc(1)Hex(1)HexNAc(1)	YXY_20200723_HF_HILIC_2ul_1	File25305 Spectrum5810 scans: 10615
P02649	VQAAVGTSAAPVPSDNH		2810.000	1984.92	2	993.468	1619.79	-0.000701292	-0.35331	3.189e-11	149	0.000595	0.00146	365.1322	Hex(1)HexNAc(1)	P02649_VQAAVGTSAAPVPSDNH_Hex(1)HexNAc(1)	YXY_20200723_HF_HILIC_2ul_1	File25305 Spectrum7441 scans: 12333
P0C0L4	LGVAHNNLMAMAQETGDNLYWGSVTGSQSNAVSPTPAPR	M9(Oxidation);M11(Oxidation)	4669.000	4567.07	4	1142.77	4072.9	-0.00783297	-1.7151	2.7008e-14	149	4.692e-05	0.00146	494.1748	HexNAc(1)Neu5Ac(1)	P0C0L4_LGVAHNNLMAMAQETGDNLYWGSVTGSQSNAVSPTPAPR_HexNAc(1)Neu5Ac(1)	YXY_20200723_HF_HILIC_2ul_1	File25305 Spectrum17795 scans: 23206
P02765	TVVQPSVGAAAGPVVPPCPGR	C18(Carbamidomethyl)	4264.000	2962.4	2	1482.21	2015.06	0.0186172	6.28448	8.2751e-09	149	0.0064	0.00146	947.3230	Hex(1)HexNAc(1)Neu5Ac(2)	P02765_TVVQPSVGAAAGPVVPPCPGR_Hex(1)HexNAc(1)Neu5Ac(2)	YXY_20200723_HF_HILIC_2ul_1	File25305 Spectrum15559 scans: 20857
P05155	NPNATSSSSQDPESLQDR	N3(Deamidated)	2409.000	2297.97	2	1149.99	1932.83	0.00514041	2.23694	4.7523e-11	149	0.005139	0.00146	365.1322	Hex(1)HexNAc(1)	P05155_NPNATSSSSQDPESLQDR_Hex(1)HexNAc(1)	YXY_20200723_HF_HILIC_2ul_1	File25305 Spectrum5137 scans: 9909
P05155	NPNATSSSSQDPESLQDRGEGK	N3(Deamidated)	2438.000	2960.25	2	1481.13	2304.01	0.0112568	3.80265	2.1437e-10	149	0.01038	0.00146	656.2276	Hex(1)HexNAc(1)Neu5Ac(1)	P05155_NPNATSSSSQDPESLQDRGEGK_Hex(1)HexNAc(1)Neu5Ac(1)	YXY_20200723_HF_HILIC_2ul_1	File25305 Spectrum5303 scans: 10083
P04004	SYYQSCCTDYTAECKPQVTR	Q4(Deamidated);C6(Carbamidomethyl);C7(Carbamidomethyl);C14(Carbamidomethyl)	4160.000	3465.32	4	867.338	2517.02	-0.0276343	-7.97453	2.3149e-11	149	0.002676	0.00146	947.3230	Hex(1)HexNAc(1)Neu5Ac(2)	P04004_SYYQSCCTDYTAECKPQVTR_Hex(1)HexNAc(1)Neu5Ac(2)	YXY_20200723_HF_HILIC_2ul_1	File25305 Spectrum14982 scans: 20251
P19827	TFVLSALQPSPTHSSSNTQR		4040.000	2522.21	3	841.745	2157.08	-0.00197446	-0.782828	1.4952e-10	149	0.00145	0.00146	365.1322	Hex(1)HexNAc(1)	P19827_TFVLSALQPSPTHSSSNTQR_Hex(1)HexNAc(1)	YXY_20200723_HF_HILIC_2ul_1	File25305 Spectrum14313 scans: 19549
P02790	TPLPPTSAHGNVAEGETKPDPDVTER		3091.000	3661.64	4	916.418	2714.31	0.003142	0.858084	2.5809e-10	148	0.006037	0.00146	947.3230	Hex(1)HexNAc(1)Neu5Ac(2)	P02790_TPLPPTSAHGNVAEGETKPDPDVTER_Hex(1)HexNAc(1)Neu5Ac(2)	YXY_20200723_HF_HILIC_2ul_1	File25305 Spectrum9056 scans: 14029
P19827	SALQPSPTHSSSNTQR		1955.000	2353.04	2	1177.53	1696.81	0.000372336	0.158236	2.1377e-10	148	0.001426	0.00146	656.2276	Hex(1)HexNAc(1)Neu5Ac(1)	P19827_SALQPSPTHSSSNTQR_Hex(1)HexNAc(1)Neu5Ac(1)	YXY_20200723_HF_HILIC_2ul_1	File25305 Spectrum2577 scans: 7221
P0C0L5	APADLRGVAHNNLMAMAQETGDNLYWGSVTGSQSNAVSPTPAPR	N11(Deamidated);N12(Deamidated);M14(Oxidation)	4545.000	4934.18	4	1234.55	4569.13	-0.0785951	-15.9287	2.8183e-15	148	0.0001667	0.00146	365.1322	Hex(1)HexNAc(1)	P0C0L5_APADLRGVAHNNLMAMAQETGDNLYWGSVTGSQSNAVSPTPAPR_Hex(1)HexNAc(1)	YXY_20200723_HF_HILIC_2ul_1	File25305 Spectrum17111 scans: 22488
P0C0L5	APADLRGVAHNNLMAMAQETGDNLYWGSVTGSQSNAVSPTPAPR	N35(Deamidated);Q18(Deamidated)	4205.000	4918.19	4	1230.56	4553.13	-0.0732804	-14.8999	2.8192e-13	148	0.0004861	0.00146	365.1322	Hex(1)HexNAc(1)	P0C0L5_APADLRGVAHNNLMAMAQETGDNLYWGSVTGSQSNAVSPTPAPR_Hex(1)HexNAc(1)	YXY_20200723_HF_HILIC_2ul_1	File25305 Spectrum15234 scans: 20516
P19827	VLSALQPSPTHSSSNTQR		2950.000	2565.19	2	1283.6	1908.97	0.00169442	0.660544	4.2345e-11	148	0.0005895	0.00146	656.2276	Hex(1)HexNAc(1)Neu5Ac(1)	P19827_VLSALQPSPTHSSSNTQR_Hex(1)HexNAc(1)Neu5Ac(1)	YXY_20200723_HF_HILIC_2ul_1	File25305 Spectrum8256 scans: 13189
P05155	NPNATSSSSQDPESLQDRGEGK	N3(Deamidated)	2225.000	2669.14	3	890.722	2304.01	0.00148033	0.55461	9.0192e-11	146	0.004713	0.00146	365.1322	Hex(1)HexNAc(1)	P05155_NPNATSSSSQDPESLQDRGEGK_Hex(1)HexNAc(1)	YXY_20200723_HF_HILIC_2ul_1	File25305 Spectrum4094 scans: 8814
P02671	GSESGIFTNTKESSSHHPGIAEFPSR		3436.000	3414.53	4	854.641	2758.29	0.0118087	3.45838	1.0175e-12	146	0.0005199	0.00146	656.2276	Hex(1)HexNAc(1)Neu5Ac(1)	P02671_GSESGIFTNTKESSSHHPGIAEFPSR_Hex(1)HexNAc(1)Neu5Ac(1)	YXY_20200723_HF_HILIC_2ul_1	File25305 Spectrum10974 scans: 16043
P02671	MADEAGSEADHEGTHSTKR		1611.000	2684.09	3	895.705	2027.86	0.00377533	1.40656	1.5614e-09	146	0.002039	0.00146	656.2276	Hex(1)HexNAc(1)Neu5Ac(1)	P02671_MADEAGSEADHEGTHSTKR_Hex(1)HexNAc(1)Neu5Ac(1)	YXY_20200723_HF_HILIC_2ul_1	File25305 Spectrum628 scans: 5174
P03952	LCNTGDNSVCTTK	C2(Carbamidomethyl);C10(Carbamidomethyl)	2159.000	2124.85	2	1063.43	1468.63	-0.00258063	-1.2145	1.3755e-09	146	0.00468	0.00146	656.2276	Hex(1)HexNAc(1)Neu5Ac(1)	P03952_LCNTGDNSVCTTK_Hex(1)HexNAc(1)Neu5Ac(1)	YXY_20200723_HF_HILIC_2ul_1	File25305 Spectrum3718 scans: 8419
P12259	FTVNNLAEPQKAPSHQQATTAGSPLR		3566.000	3418.64	4	855.666	2762.41	-0.00109576	-0.320526	3.2365e-10	145	0.008496	0.00146	656.2276	Hex(1)HexNAc(1)Neu5Ac(1)	P12259_FTVNNLAEPQKAPSHQQATTAGSPLR_Hex(1)HexNAc(1)Neu5Ac(1)	YXY_20200723_HF_HILIC_2ul_1	File25305 Spectrum11692 scans: 16797
P05155	SSNPNATSSSSQDPESLQDRGEGK		2538.000	2988.24	3	997.086	2477.09	-0.0435609	-14.5775	9.3844e-11	145	0.01713	0.00146	511.1901	Fuc(1)Hex(1)HexNAc(1)	P05155_SSNPNATSSSSQDPESLQDRGEGK_Fuc(1)Hex(1)HexNAc(1)	YXY_20200723_HF_HILIC_2ul_1	File25305 Spectrum5872 scans: 10681
P02748	QYTTSYDPELTESSGSASHIDCR	C22(Carbamidomethyl)	4061.000	3550.45	3	1184.49	2603.11	0.0169808	4.78273	4.1107e-10	145	0.001034	0.00146	947.3230	Hex(1)HexNAc(1)Neu5Ac(2)	P02748_QYTTSYDPELTESSGSASHIDCR_Hex(1)HexNAc(1)Neu5Ac(2)	YXY_20200723_HF_HILIC_2ul_1	File25305 Spectrum14429 scans: 19671
P02649	VQAAVGTSAAPVPSDNH		2855.000	1984.93	2	993.474	1619.79	0.0100987	5.08768	7.4645e-13	145	0.0003506	0.00146	365.1322	Hex(1)HexNAc(1)	P02649_VQAAVGTSAAPVPSDNH_Hex(1)HexNAc(1)	YXY_20200723_HF_HILIC_2ul_1	File25305 Spectrum7703 scans: 12608
P05155	NPNATSSSSQDPESLQDRGEGK	N3(Deamidated)	2437.000	2960.24	4	741.068	2304.01	0.00550387	1.85926	6.8936e-11	144	0.005732	0.00146	656.2276	Hex(1)HexNAc(1)Neu5Ac(1)	P05155_NPNATSSSSQDPESLQDRGEGK_Hex(1)HexNAc(1)Neu5Ac(1)	YXY_20200723_HF_HILIC_2ul_1	File25305 Spectrum5298 scans: 10078
Q14624	IEETTMTTQTPAPIQAPSAILPLPGQSVER	M6(Oxidation)	4824.000	3847.88	4	962.976	3191.64	0.0108996	2.83263	4.1883e-12	144	0.0006829	0.00146	656.2276	Hex(1)HexNAc(1)Neu5Ac(1)	Q14624_IEETTMTTQTPAPIQAPSAILPLPGQSVER_Hex(1)HexNAc(1)Neu5Ac(1)	YXY_20200723_HF_HILIC_2ul_1	File25305 Spectrum18620 scans: 24130
P02790	TPLPPTSAHGNVAEGETKPDPDVTER	N11(Deamidated)	2728.000	3081.45	3	1028.16	2715.3	0.0210342	6.82607	4.9423e-12	143	0.00105	0.00146	365.1322	Hex(1)HexNAc(1)	P02790_TPLPPTSAHGNVAEGETKPDPDVTER_Hex(1)HexNAc(1)	YXY_20200723_HF_HILIC_2ul_1	File25305 Spectrum6960 scans: 11828
P05155	SSNPNATSSSSQDPESLQDR		2745.000	2617.06	3	873.36	2105.91	-0.0425773	-16.2692	2.6158e-09	143	0.04066	0.00146	511.1901	Fuc(1)Hex(1)HexNAc(1)	P05155_SSNPNATSSSSQDPESLQDR_Fuc(1)Hex(1)HexNAc(1)	YXY_20200723_HF_HILIC_2ul_1	File25305 Spectrum7056 scans: 11929
P02649	VQAAVGTSAAPVPSDNH		3211.000	2567.12	3	856.716	1619.79	0.0116222	4.52734	9.7649e-10	143	0.01032	0.00146	947.3230	Hex(1)HexNAc(1)Neu5Ac(2)	P02649_VQAAVGTSAAPVPSDNH_Hex(1)HexNAc(1)Neu5Ac(2)	YXY_20200723_HF_HILIC_2ul_1	File25305 Spectrum9734 scans: 14741
P05155	NATSSSSQDPESLQDRGEGK	N1(Deamidated)	2208.000	2458.05	3	820.357	2092.91	0.00337166	1.37168	7.7428e-08	143	0.002207	0.00146	365.1322	Hex(1)HexNAc(1)	P05155_NATSSSSQDPESLQDRGEGK_Hex(1)HexNAc(1)	YXY_20200723_HF_HILIC_2ul_1	File25305 Spectrum3995 scans: 8710
Q96PD5	DGSPDVTTADIGANTPDATKGCPDVQASLPDAK	C22(Carbamidomethyl)	4095.000	4231.86	3	1411.63	3283.52	0.0167574	3.95982	1.8887e-11	142	0.0005488	0.00146	947.3230	Hex(1)HexNAc(1)Neu5Ac(2)	Q96PD5_DGSPDVTTADIGANTPDATKGCPDVQASLPDAK_Hex(1)HexNAc(1)Neu5Ac(2)	YXY_20200723_HF_HILIC_2ul_1	File25305 Spectrum14621 scans: 19872
P02671	HRHPDEAAFFDTASTGK		3294.000	2833.2	4	709.307	1885.87	0.00437017	1.54249	5.526e-11	142	0.002057	0.00146	947.3230	Hex(1)HexNAc(1)Neu5Ac(2)	P02671_HRHPDEAAFFDTASTGK_Hex(1)HexNAc(1)Neu5Ac(2)	YXY_20200723_HF_HILIC_2ul_1	File25305 Spectrum10194 scans: 15224
P00450	EPEKVDKDNEDFQESNR		2697.000	2590.08	4	648.528	2077.92	-0.0301305	-11.633	3.4529e-10	142	0.009602	0.00146	511.1901	Fuc(1)Hex(1)HexNAc(1)	P00450_EPEKVDKDNEDFQESNR_Fuc(1)Hex(1)HexNAc(1)	YXY_20200723_HF_HILIC_2ul_1	File25305 Spectrum6778 scans: 11637
P19827	TFVLSALQPSPTHSSSNTQR		4614.000	3104.42	3	1035.81	2157.08	0.0148255	4.77563	2.6181e-09	141	0.003878	0.00146	947.3230	Hex(1)HexNAc(1)Neu5Ac(2)	P19827_TFVLSALQPSPTHSSSNTQR_Hex(1)HexNAc(1)Neu5Ac(2)	YXY_20200723_HF_HILIC_2ul_1	File25305 Spectrum17493 scans: 22889
P07996	PDQADTDNNGEGDACAADIDGDGILNER	C15(Carbamidomethyl)	3732.000	3282.35	3	1095.12	2917.19	0.0272547	8.3034	9.8232e-15	141	8.136e-05	0.00146	365.1322	Hex(1)HexNAc(1)	P07996_PDQADTDNNGEGDACAADIDGDGILNER_Hex(1)HexNAc(1)	YXY_20200723_HF_HILIC_2ul_1	File25305 Spectrum12613 scans: 17764
P0C0L4	LGVAHNNLMAMAQETGDNLYWGSVTGSQSNAVSPTPAPR	M9(Oxidation)	4154.000	4916.18	4	1230.05	4056.91	-0.0347183	-7.06206	1.2516e-12	141	0.00156	0.00146	859.3070	Hex(1)HexNAc(2)Neu5Ac(1)	P0C0L4_LGVAHNNLMAMAQETGDNLYWGSVTGSQSNAVSPTPAPR_Hex(1)HexNAc(2)Neu5Ac(1)	YXY_20200723_HF_HILIC_2ul_1	File25305 Spectrum14949 scans: 20217
Q13790	DANISQPETTKEGLR		2889.000	2605.16	3	869.393	1657.83	0.00554279	2.12762	1.3071e-10	141	0.001381	0.00146	947.3230	Hex(1)HexNAc(1)Neu5Ac(2)	Q13790_DANISQPETTKEGLR_Hex(1)HexNAc(1)Neu5Ac(2)	YXY_20200723_HF_HILIC_2ul_1	File25305 Spectrum7894 scans: 12809
P02790	TPLPPTSAHGNVAEGETKPDPDVTER		2956.000	2917.37	4	730.349	2714.31	-0.027658	-9.48047	2.3978e-10	140	0.002423	0.00146	203.0794	HexNAc(1)	P02790_TPLPPTSAHGNVAEGETKPDPDVTER_HexNAc(1)	YXY_20200723_HF_HILIC_2ul_1	File25305 Spectrum8290 scans: 13224
Q15942	HVQPQPQPKPQVQLHVQSQTQPVSLANTQPR		3257.000	3697.94	4	925.493	3494.85	0.013612	3.68096	4.2731e-14	140	0.0004637	0.00146	203.0794	HexNAc(1)	Q15942_HVQPQPQPKPQVQLHVQSQTQPVSLANTQPR_HexNAc(1)	YXY_20200723_HF_HILIC_2ul_1	File25305 Spectrum9991 scans: 15011
P02652	EPCVESLVSQYFQTVTDYGKDLMEK	C3(Carbamidomethyl);Q10(Deamidated)	4969.000	3914.73	3	1305.92	2966.36	0.04406	11.2549	5.0565e-11	140	0.002624	0.00146	947.3230	Hex(1)HexNAc(1)Neu5Ac(2)	P02652_EPCVESLVSQYFQTVTDYGKDLMEK_Hex(1)HexNAc(1)Neu5Ac(2)	YXY_20200723_HF_HILIC_2ul_1	File25305 Spectrum19400 scans: 24986
P02671	QFTSSTSYNRGDSTFESK		2988.000	2698.14	3	900.388	2040.9	0.00892431	3.30757	2.1335e-11	138	0.003446	0.00146	656.2276	Hex(1)HexNAc(1)Neu5Ac(1)	P02671_QFTSSTSYNRGDSTFESK_Hex(1)HexNAc(1)Neu5Ac(1)	YXY_20200723_HF_HILIC_2ul_1	File25305 Spectrum8474 scans: 13418
P05154	KRVEDLHVGATVAPSSR		2549.000	2477.22	3	826.747	1820.99	0.00647648	2.61441	8.1673e-08	137	0.04988	0.00146	656.2276	Hex(1)HexNAc(1)Neu5Ac(1)	P05154_KRVEDLHVGATVAPSSR_Hex(1)HexNAc(1)Neu5Ac(1)	YXY_20200723_HF_HILIC_2ul_1	File25305 Spectrum5938 scans: 10750
P0C0L4	LLGVAHNNLMAMAQETGDNLYWGSVTGSQSNAVSPTPAPR	M10(Oxidation);M12(Oxidation)	3507.000	4698.12	5	940.631	4185.98	-0.0601421	-12.8013	5.4608e-15	137	0.0001909	0.00146	511.1901	Fuc(1)Hex(1)HexNAc(1)	P0C0L4_LLGVAHNNLMAMAQETGDNLYWGSVTGSQSNAVSPTPAPR_Fuc(1)Hex(1)HexNAc(1)	YXY_20200723_HF_HILIC_2ul_1	File25305 Spectrum11365 scans: 16453
P02790	TPLPPTSAHGNVAEGETKPDPDVTER		2852.000	3080.46	3	1027.83	2714.31	0.00784982	2.54827	4.6682e-12	137	0.0003839	0.00146	365.1322	Hex(1)HexNAc(1)	P02790_TPLPPTSAHGNVAEGETKPDPDVTER_Hex(1)HexNAc(1)	YXY_20200723_HF_HILIC_2ul_1	File25305 Spectrum7689 scans: 12593
P02787	QLCPGCGCSTLNQYFGYSGAFK	Q1(Deamidated);C3(Carbamidomethyl);C6(Carbamidomethyl);C8(Carbamidomethyl)	4836.000	4339.79	4	1085.96	2515.06	0.0848741	19.5572	2.4131e-12	137	0.001496	0.00146	1823.6453	Fuc(1)Hex(3)HexNAc(3)Neu5Ac(2)	P02787_QLCPGCGCSTLNQYFGYSGAFK_Fuc(1)Hex(3)HexNAc(3)Neu5Ac(2)	YXY_20200723_HF_HILIC_2ul_1	File25305 Spectrum18688 scans: 24207
P02790	TPLPPTSAHGNVAEGETKPDPDVTER		3142.000	3661.62	3	1221.55	2714.31	-0.0185815	-5.07468	2.0764e-10	137	0.0006953	0.00146	947.3230	Hex(1)HexNAc(1)Neu5Ac(2)	P02790_TPLPPTSAHGNVAEGETKPDPDVTER_Hex(1)HexNAc(1)Neu5Ac(2)	YXY_20200723_HF_HILIC_2ul_1	File25305 Spectrum9350 scans: 14338
P0C0L5	APADLRGVAHNNLMAMAQETGDNLYWGSVTGSQSNAVSPTPAPR	N11(Deamidated);N12(Deamidated);M16(Oxidation)	4334.000	4934.19	4	1234.55	4569.13	-0.0753951	-15.2801	3.1719e-13	137	0.0004622	0.00146	365.1322	Hex(1)HexNAc(1)	P0C0L5_APADLRGVAHNNLMAMAQETGDNLYWGSVTGSQSNAVSPTPAPR_Hex(1)HexNAc(1)	YXY_20200723_HF_HILIC_2ul_1	File25305 Spectrum15946 scans: 21265
P02671	GTGSETESPRNPSSAGSWNSGSSGPGSTGNR		2851.000	3459.48	3	1154.17	2964.28	0.0223908	6.4723	7.9094e-13	136	0.0004204	0.00146	494.1748	HexNAc(1)Neu5Ac(1)	P02671_GTGSETESPRNPSSAGSWNSGSSGPGSTGNR_HexNAc(1)Neu5Ac(1)	YXY_20200723_HF_HILIC_2ul_1	File25305 Spectrum7683 scans: 12587
P0C0L5	GVAHNNLMAMAQETGDNLYWGSVTGSQSNAVSPTPAPR	Q12(Deamidated);N17(Deamidated)	4669.000	4295.98	4	1075	3929.79	0.0469605	10.9313	4.5506e-12	136	0.001546	0.00146	365.1322	Hex(1)HexNAc(1)	P0C0L5_GVAHNNLMAMAQETGDNLYWGSVTGSQSNAVSPTPAPR_Hex(1)HexNAc(1)	YXY_20200723_HF_HILIC_2ul_1	File25305 Spectrum17794 scans: 23205
P02671	GNEITRGGSTSYGTGSETESPRNPSSAGSWNSGSSGPGSTGNR	N2(Deamidated)	2518.000	4553.94	5	911.796	4187.82	-0.0183069	-4.02001	7.7304e-12	136	0.0005009	0.00146	365.1322	Hex(1)HexNAc(1)	P02671_GNEITRGGSTSYGTGSETESPRNPSSAGSWNSGSSGPGSTGNR_Hex(1)HexNAc(1)	YXY_20200723_HF_HILIC_2ul_1	File25305 Spectrum5755 scans: 10558
P02656	DKFSEFWDLDPEVRPTSAVAA		4895.000	3326.48	3	1109.83	2379.14	0.0170793	5.13436	2.9422e-08	136	0.006005	0.00146	947.3230	Hex(1)HexNAc(1)Neu5Ac(2)	P02656_DKFSEFWDLDPEVRPTSAVAA_Hex(1)HexNAc(1)Neu5Ac(2)	YXY_20200723_HF_HILIC_2ul_1	File25305 Spectrum19001 scans: 24552
P05154	KRVEDLHVGATVAPSSR		2549.000	2477.22	4	620.311	1820.99	0.00240001	0.968834	6.0857e-12	136	0.003257	0.00146	656.2276	Hex(1)HexNAc(1)Neu5Ac(1)	P05154_KRVEDLHVGATVAPSSR_Hex(1)HexNAc(1)Neu5Ac(1)	YXY_20200723_HF_HILIC_2ul_1	File25305 Spectrum5934 scans: 10746
P01876	HYTNPSQDVTVPCPVPSTPPTPSPSTPPTPSPSCCHPR	C34(Carbamidomethyl);C35(Carbamidomethyl);C13(Carbamidomethyl)	3807.000	4995.19	4	1249.81	4135.88	0.00205994	0.412384	3.6129e-11	136	0.002386	0.00146	859.3070	Hex(1)HexNAc(2)Neu5Ac(1)	P01876_HYTNPSQDVTVPCPVPSTPPTPSPSTPPTPSPSCCHPR_Hex(1)HexNAc(2)Neu5Ac(1)	YXY_20200723_HF_HILIC_2ul_1	File25305 Spectrum13031 scans: 18203
P02751	HTSVQTTSSGSGPFTDVR		3180.000	2519.12	2	1260.57	1862.88	0.0155781	6.18396	5.4371e-09	135	0.004089	0.00146	656.2276	Hex(1)HexNAc(1)Neu5Ac(1)	P02751_HTSVQTTSSGSGPFTDVR_Hex(1)HexNAc(1)Neu5Ac(1)	YXY_20200723_HF_HILIC_2ul_1	File25305 Spectrum9562 scans: 14560
Q96PD5	DGSPDVTTADIGANTPDATK		3412.000	2892.23	3	965.084	1944.89	0.0162263	5.61032	2.4141e-11	135	0.000648	0.00146	947.3230	Hex(1)HexNAc(1)Neu5Ac(2)	Q96PD5_DGSPDVTTADIGANTPDATK_Hex(1)HexNAc(1)Neu5Ac(2)	YXY_20200723_HF_HILIC_2ul_1	File25305 Spectrum10841 scans: 15903
Q13790	DANISQPETTKEGLR		2528.000	2314.06	3	772.359	1657.83	0.00164279	0.709917	1.944e-08	135	0.003756	0.00146	656.2276	Hex(1)HexNAc(1)Neu5Ac(1)	Q13790_DANISQPETTKEGLR_Hex(1)HexNAc(1)Neu5Ac(1)	YXY_20200723_HF_HILIC_2ul_1	File25305 Spectrum5815 scans: 10621
P05155	SSNPNATSSSSQDPESLQDRGEGK		2465.000	2988.25	3	997.091	2477.09	-0.0288609	-9.65813	1.5629e-09	135	0.007332	0.00146	511.1901	Fuc(1)Hex(1)HexNAc(1)	P05155_SSNPNATSSSSQDPESLQDRGEGK_Fuc(1)Hex(1)HexNAc(1)	YXY_20200723_HF_HILIC_2ul_1	File25305 Spectrum5452 scans: 10240
P0C0L5	APADLRGVAHNNLMAMAQETGDNLYWGSVTGSQSNAVSPTPAPR	N12(Deamidated);M16(Oxidation)	3547.000	4974.2	5	995.848	4568.14	-0.0989559	-19.8938	1.5567e-14	135	0.001612	0.00146	406.1587	HexNAc(2)	P0C0L5_APADLRGVAHNNLMAMAQETGDNLYWGSVTGSQSNAVSPTPAPR_HexNAc(2)	YXY_20200723_HF_HILIC_2ul_1	File25305 Spectrum11587 scans: 16686
P05155	NPNATSSSSQDPESLQDR	N3(Deamidated)	2665.000	2590.06	2	1296.04	1932.83	-0.00212823	-0.821692	1.0478e-08	134	0.003516	0.00146	656.2276	Hex(1)HexNAc(1)Neu5Ac(1)	P05155_NPNATSSSSQDPESLQDR_Hex(1)HexNAc(1)Neu5Ac(1)	YXY_20200723_HF_HILIC_2ul_1	File25305 Spectrum6595 scans: 11445
P02790	TPLPPTSAHGNVAEGETKPDPDVTER		2754.000	3079.46	4	770.871	2714.31	0.009942	3.22849	5.585e-09	134	0.003223	0.00146	365.1322	Hex(1)HexNAc(1)	P02790_TPLPPTSAHGNVAEGETKPDPDVTER_Hex(1)HexNAc(1)	YXY_20200723_HF_HILIC_2ul_1	File25305 Spectrum7112 scans: 11988
P02765	QPSGELFEIEIDTLETTCHVLDPTPVAR	C18(Carbamidomethyl)	5071.000	3677.81	3	1226.94	3166.55	0.0675254	18.3602	3.6788e-09	134	0.002168	0.00146	511.1901	Fuc(1)Hex(1)HexNAc(1)	P02765_QPSGELFEIEIDTLETTCHVLDPTPVAR_Fuc(1)Hex(1)HexNAc(1)	YXY_20200723_HF_HILIC_2ul_1	File25305 Spectrum19949 scans: 25589
P05154	VEDLHVGATVAPSSR		3327.000	2484.12	3	829.047	1536.79	0.00505054	2.03313	1.3708e-08	134	0.01547	0.00146	947.3230	Hex(1)HexNAc(1)Neu5Ac(2)	P05154_VEDLHVGATVAPSSR_Hex(1)HexNAc(1)Neu5Ac(2)	YXY_20200723_HF_HILIC_2ul_1	File25305 Spectrum10376 scans: 15415
P05155	SSNPNATSSSSQDPESLQDRGEGK		2490.000	2988.24	3	997.087	2477.09	-0.0426609	-14.2763	5.0144e-09	133	0.01074	0.00146	511.1901	Fuc(1)Hex(1)HexNAc(1)	P05155_SSNPNATSSSSQDPESLQDRGEGK_Fuc(1)Hex(1)HexNAc(1)	YXY_20200723_HF_HILIC_2ul_1	File25305 Spectrum5593 scans: 10388
P02790	LPPTSAHGNVAEGETKPDPDVTER		2836.000	3172.45	4	794.119	2516.21	0.00498435	1.57114	1.8303e-07	132	0.03552	0.00146	656.2276	Hex(1)HexNAc(1)Neu5Ac(1)	P02790_LPPTSAHGNVAEGETKPDPDVTER_Hex(1)HexNAc(1)Neu5Ac(1)	YXY_20200723_HF_HILIC_2ul_1	File25305 Spectrum7592 scans: 12492
P04275	KVNCTTQPCPTAKAPTCGLCEVAR	N3(Deamidated);C4(Carbamidomethyl);C9(Carbamidomethyl);C17(Carbamidomethyl);C20(Carbamidomethyl)	3388.000	3666.58	4	917.653	2719.26	0.00328325	0.895451	1.4819e-09	132	0.002401	0.00146	947.3230	Hex(1)HexNAc(1)Neu5Ac(2)	P04275_KVNCTTQPCPTAKAPTCGLCEVAR_Hex(1)HexNAc(1)Neu5Ac(2)	YXY_20200723_HF_HILIC_2ul_1	File25305 Spectrum10712 scans: 15768
P0C0L5	APADLRGVAHNNLMAMAQETGDNLYWGSVTGSQSNAVSPTPAPR	M14(Oxidation);M16(Oxidation)	4137.000	4948.22	4	1238.06	4583.16	-0.0718785	-14.5261	8.3771e-12	132	0.001017	0.00146	365.1322	Hex(1)HexNAc(1)	P0C0L5_APADLRGVAHNNLMAMAQETGDNLYWGSVTGSQSNAVSPTPAPR_Hex(1)HexNAc(1)	YXY_20200723_HF_HILIC_2ul_1	File25305 Spectrum14853 scans: 20116
P01876	HYTNPSQDVTVPCPVPSTPPTPSPSTPPTPSPSCCHPR	C34(Carbamidomethyl);C35(Carbamidomethyl);N4(Deamidated);Q7(Deamidated);C13(Carbamidomethyl)	3708.000	4545.05	4	1137.27	4137.85	0.0334601	7.36189	2.6891e-11	131	0.0008915	0.00146	406.1587	HexNAc(2)	P01876_HYTNPSQDVTVPCPVPSTPPTPSPSTPPTPSPSCCHPR_HexNAc(2)	YXY_20200723_HF_HILIC_2ul_1	File25305 Spectrum12483 scans: 17627
P49747	QKDSDGDGIGDACDNCPQK	C13(Carbamidomethyl);C16(Carbamidomethyl)	2312.000	2591.05	3	864.69	2078.83	0.0294557	11.3683	1.1393e-10	131	0.00291	0.00146	511.1901	Fuc(1)Hex(1)HexNAc(1)	P49747_QKDSDGDGIGDACDNCPQK_Fuc(1)Hex(1)HexNAc(1)	YXY_20200723_HF_HILIC_2ul_1	File25305 Spectrum4581 scans: 9325
P02656	DKFSEFWDLDPEVRPTSAVAA		4895.000	3326.48	4	832.626	2379.14	0.0148029	4.45002	2.051e-07	131	0.09398	0.00146	947.3230	Hex(1)HexNAc(1)Neu5Ac(2)	P02656_DKFSEFWDLDPEVRPTSAVAA_Hex(1)HexNAc(1)Neu5Ac(2)	YXY_20200723_HF_HILIC_2ul_1	File25305 Spectrum19002 scans: 24553
P02671	YGTGSETESPRNPSSAGSWNSGSSGPGSTGNR		2714.000	3622.53	3	1208.52	3127.35	0.00786225	2.17037	4.33e-11	131	0.0004175	0.00146	494.1748	HexNAc(1)Neu5Ac(1)	P02671_YGTGSETESPRNPSSAGSWNSGSSGPGSTGNR_HexNAc(1)Neu5Ac(1)	YXY_20200723_HF_HILIC_2ul_1	File25305 Spectrum6871 scans: 11734
P02671	HRHPDEAAFFDTASTGK		3034.000	2542.09	2	1272.05	1885.87	-0.00767689	-3.01991	5.6801e-09	131	0.005744	0.00146	656.2276	Hex(1)HexNAc(1)Neu5Ac(1)	P02671_HRHPDEAAFFDTASTGK_Hex(1)HexNAc(1)Neu5Ac(1)	YXY_20200723_HF_HILIC_2ul_1	File25305 Spectrum8740 scans: 13697
Q13790	DANISQPETTKEGLR		2765.000	2314.05	3	772.359	1657.83	-0.000157211	-0.0679376	1.9167e-09	130	0.006531	0.00146	656.2276	Hex(1)HexNAc(1)Neu5Ac(1)	Q13790_DANISQPETTKEGLR_Hex(1)HexNAc(1)Neu5Ac(1)	YXY_20200723_HF_HILIC_2ul_1	File25305 Spectrum7174 scans: 12053
Q13790	DANISQPETTKEGLR		2630.000	2314.06	3	772.359	1657.83	0.000442789	0.191347	4.9286e-08	130	0.003887	0.00146	656.2276	Hex(1)HexNAc(1)Neu5Ac(1)	Q13790_DANISQPETTKEGLR_Hex(1)HexNAc(1)Neu5Ac(1)	YXY_20200723_HF_HILIC_2ul_1	File25305 Spectrum6394 scans: 11229
P00450	EPEKVDKDNEDFQESNR		2517.000	2589.1	2	1295.56	2077.92	-0.0129089	-4.98589	5.4916e-09	130	0.02257	0.00146	511.1901	Fuc(1)Hex(1)HexNAc(1)	P00450_EPEKVDKDNEDFQESNR_Fuc(1)Hex(1)HexNAc(1)	YXY_20200723_HF_HILIC_2ul_1	File25305 Spectrum5754 scans: 10557
P00450	FNKNNEGTYYSPNYNPQSR		3074.000	2948.26	3	983.761	2292.02	0.0127975	4.3407	1.9397e-09	129	0.003374	0.00146	656.2276	Hex(1)HexNAc(1)Neu5Ac(1)	P00450_FNKNNEGTYYSPNYNPQSR_Hex(1)HexNAc(1)Neu5Ac(1)	YXY_20200723_HF_HILIC_2ul_1	File25305 Spectrum8964 scans: 13932
P00450	EPEKVDKDNEDFQESNR		2534.000	2589.09	4	648.281	2077.92	-0.0156619	-6.04918	3.9669e-09	129	0.02251	0.00146	511.1901	Fuc(1)Hex(1)HexNAc(1)	P00450_EPEKVDKDNEDFQESNR_Fuc(1)Hex(1)HexNAc(1)	YXY_20200723_HF_HILIC_2ul_1	File25305 Spectrum5852 scans: 10660
P02790	TPLPPTSAHGNVAEGETKPDPDVTER		2920.000	3370.55	4	843.645	2714.31	0.007742	2.29695	5.5805e-09	129	0.001668	0.00146	656.2276	Hex(1)HexNAc(1)Neu5Ac(1)	P02790_TPLPPTSAHGNVAEGETKPDPDVTER_Hex(1)HexNAc(1)Neu5Ac(1)	YXY_20200723_HF_HILIC_2ul_1	File25305 Spectrum8074 scans: 12998
P05155	PNATSSSSQDPESLQDR	N2(Deamidated)	2668.000	2475.01	3	826.011	1818.79	-0.00440859	-1.78124	1.0866e-07	129	0.01958	0.00146	656.2276	Hex(1)HexNAc(1)Neu5Ac(1)	P05155_PNATSSSSQDPESLQDR_Hex(1)HexNAc(1)Neu5Ac(1)	YXY_20200723_HF_HILIC_2ul_1	File25305 Spectrum6609 scans: 11459
P02790	LPPTSAHGNVAEGETKPDPDVTER		2843.000	3173.45	3	1058.82	2516.21	0.00719217	2.26636	2.5031e-09	129	0.0032	0.00146	656.2276	Hex(1)HexNAc(1)Neu5Ac(1)	P02790_LPPTSAHGNVAEGETKPDPDVTER_Hex(1)HexNAc(1)Neu5Ac(1)	YXY_20200723_HF_HILIC_2ul_1	File25305 Spectrum7635 scans: 12537
Q9UGM5	KFVSVTCDFFESQAPATGSENSAVNQKPTNLPK	C7(Carbamidomethyl)	4512.000	4108.89	3	1370.64	3597.74	-0.0397915	-9.68425	2.9377e-10	129	0.008942	0.00146	511.1901	Fuc(1)Hex(1)HexNAc(1)	Q9UGM5_KFVSVTCDFFESQAPATGSENSAVNQKPTNLPK_Fuc(1)Hex(1)HexNAc(1)	YXY_20200723_HF_HILIC_2ul_1	File25305 Spectrum16932 scans: 22300
P02790	TPLPPTSAHGNVAEGETKPDPDVTER		3139.000	3661.64	4	916.417	2714.31	0.001942	0.530363	4.006e-08	129	0.01643	0.00146	947.3230	Hex(1)HexNAc(1)Neu5Ac(2)	P02790_TPLPPTSAHGNVAEGETKPDPDVTER_Hex(1)HexNAc(1)Neu5Ac(2)	YXY_20200723_HF_HILIC_2ul_1	File25305 Spectrum9330 scans: 14317
P05155	NPNATSSSSQDPESLQDR	N3(Deamidated)	2827.000	2880.16	3	961.06	1932.83	0.00576394	2.00126	4.2323e-08	129	0.01646	0.00146	947.3230	Hex(1)HexNAc(1)Neu5Ac(2)	P05155_NPNATSSSSQDPESLQDR_Hex(1)HexNAc(1)Neu5Ac(2)	YXY_20200723_HF_HILIC_2ul_1	File25305 Spectrum7538 scans: 12435
P02671	HRHPDEAAFFDTASTGK		3295.000	2833.19	3	945.405	1885.87	-0.000553361	-0.195313	7.0067e-11	129	0.001583	0.00146	947.3230	Hex(1)HexNAc(1)Neu5Ac(2)	P02671_HRHPDEAAFFDTASTGK_Hex(1)HexNAc(1)Neu5Ac(2)	YXY_20200723_HF_HILIC_2ul_1	File25305 Spectrum10195 scans: 15225
P0C0L5	APADLRGVAHNNLMAMAQETGDNLYWGSVTGSQSNAVSPTPAPR	N23(Deamidated)	4167.000	4917.2	5	984.447	4552.15	-0.0830413	-16.8879	5.2825e-13	127	0.004432	0.00146	365.1322	Hex(1)HexNAc(1)	P0C0L5_APADLRGVAHNNLMAMAQETGDNLYWGSVTGSQSNAVSPTPAPR_Hex(1)HexNAc(1)	YXY_20200723_HF_HILIC_2ul_1	File25305 Spectrum15023 scans: 20294
P00450	EPEKVDKDNEDFQESNR		2559.000	2590.09	4	648.529	2077.92	-0.0261305	-10.0887	6.5638e-08	127	0.02915	0.00146	511.1901	Fuc(1)Hex(1)HexNAc(1)	P00450_EPEKVDKDNEDFQESNR_Fuc(1)Hex(1)HexNAc(1)	YXY_20200723_HF_HILIC_2ul_1	File25305 Spectrum5995 scans: 10810
P05155	SSNPNATSSSSQDPESLQDR	N5(Deamidated)	2876.000	2618.06	3	873.693	2106.89	-0.0266929	-10.1957	1.3919e-10	127	0.008955	0.00146	511.1901	Fuc(1)Hex(1)HexNAc(1)	P05155_SSNPNATSSSSQDPESLQDR_Fuc(1)Hex(1)HexNAc(1)	YXY_20200723_HF_HILIC_2ul_1	File25305 Spectrum7825 scans: 12736
P01876	HVKHYTNPSQDVTVPCPVPSTPPTPSPSTPPTPSPSCCHPR	C37(Carbamidomethyl);C38(Carbamidomethyl);C16(Carbamidomethyl)	3700.000	4704.12	4	1177.04	4500.1	-0.0694975	-14.7738	3.2713e-10	127	0.003568	0.00146	203.0794	HexNAc(1)	P01876_HVKHYTNPSQDVTVPCPVPSTPPTPSPSTPPTPSPSCCHPR_HexNAc(1)	YXY_20200723_HF_HILIC_2ul_1	File25305 Spectrum12434 scans: 17576
P02790	TPLPPTSAHGNVAEGETKPDPDVTER	N11(Deamidated)	2988.000	3372.56	2	1687.29	2715.3	0.0350107	10.381	1.9652e-10	127	0.00245	0.00146	656.2276	Hex(1)HexNAc(1)Neu5Ac(1)	P02790_TPLPPTSAHGNVAEGETKPDPDVTER_Hex(1)HexNAc(1)Neu5Ac(1)	YXY_20200723_HF_HILIC_2ul_1	File25305 Spectrum8479 scans: 13423
P02751	MVQPQSPVAVSQSKPGCYDNGK	Q5(Deamidated);C17(Carbamidomethyl)	2967.000	2872.34	3	958.452	2377.1	0.0531712	18.5115	4.5519e-10	127	0.006847	0.00146	494.1748	HexNAc(1)Neu5Ac(1)	P02751_MVQPQSPVAVSQSKPGCYDNGK_HexNAc(1)Neu5Ac(1)	YXY_20200723_HF_HILIC_2ul_1	File25305 Spectrum8355 scans: 13293
P0C0L5	APADLRGVAHNNLMAMAQETGDNLYWGSVTGSQSNAVSPTPAPR	N11(Deamidated);N12(Deamidated)	4413.000	4918.19	4	1230.55	4553.13	-0.0804804	-16.3638	4.6189e-12	127	0.004703	0.00146	365.1322	Hex(1)HexNAc(1)	P0C0L5_APADLRGVAHNNLMAMAQETGDNLYWGSVTGSQSNAVSPTPAPR_Hex(1)HexNAc(1)	YXY_20200723_HF_HILIC_2ul_1	File25305 Spectrum16387 scans: 21728
P05154	RVEDLHVGATVAPSSR		2881.000	2349.12	3	784.048	1692.89	0.0047395	2.01756	3.9872e-09	127	0.01033	0.00146	656.2276	Hex(1)HexNAc(1)Neu5Ac(1)	P05154_RVEDLHVGATVAPSSR_Hex(1)HexNAc(1)Neu5Ac(1)	YXY_20200723_HF_HILIC_2ul_1	File25305 Spectrum7850 scans: 12762
P02790	TPLPPTSAHGNVAEGETKPDPDVTER		2778.000	3079.45	4	770.87	2714.31	0.001942	0.630631	3.6152e-10	126	0.003471	0.00146	365.1322	Hex(1)HexNAc(1)	P02790_TPLPPTSAHGNVAEGETKPDPDVTER_Hex(1)HexNAc(1)	YXY_20200723_HF_HILIC_2ul_1	File25305 Spectrum7252 scans: 12135
P05155	NPNATSSSSQDPESLQDRGEGK	N3(Deamidated)	2468.000	2960.24	3	987.755	2304.01	0.00418033	1.41216	7.159e-09	126	0.002217	0.00146	656.2276	Hex(1)HexNAc(1)Neu5Ac(1)	P05155_NPNATSSSSQDPESLQDRGEGK_Hex(1)HexNAc(1)Neu5Ac(1)	YXY_20200723_HF_HILIC_2ul_1	File25305 Spectrum5473 scans: 10262
P00450	PEKVDKDNEDFQESNR		2397.000	2605.09	4	652.28	1948.88	-0.0109688	-4.21051	8.5569e-08	126	0.01023	0.00146	656.2276	Hex(1)HexNAc(1)Neu5Ac(1)	P00450_PEKVDKDNEDFQESNR_Hex(1)HexNAc(1)Neu5Ac(1)	YXY_20200723_HF_HILIC_2ul_1	File25305 Spectrum5065 scans: 9833
P01009	GDAAQKTDTSHHDQDHPTFNK		2204.000	2861.23	3	954.75	2349.04	-0.000612139	-0.213943	3.3742e-10	126	0.00206	0.00146	511.1901	Fuc(1)Hex(1)HexNAc(1)	P01009_GDAAQKTDTSHHDQDHPTFNK_Fuc(1)Hex(1)HexNAc(1)	YXY_20200723_HF_HILIC_2ul_1	File25305 Spectrum3973 scans: 8687
P02790	TPLPPTSAHGNVAEGETKPDPDVTER		2970.000	3370.55	4	843.645	2714.31	0.010142	3.009	1.8932e-08	126	0.01005	0.00146	656.2276	Hex(1)HexNAc(1)Neu5Ac(1)	P02790_TPLPPTSAHGNVAEGETKPDPDVTER_Hex(1)HexNAc(1)Neu5Ac(1)	YXY_20200723_HF_HILIC_2ul_1	File25305 Spectrum8369 scans: 13308
P19827	RTFVLSALQPSPTHSSSNTQR		3775.000	2969.42	3	990.814	2313.18	0.00911451	3.06946	4.0954e-10	126	0.001811	0.00146	656.2276	Hex(1)HexNAc(1)Neu5Ac(1)	P19827_RTFVLSALQPSPTHSSSNTQR_Hex(1)HexNAc(1)Neu5Ac(1)	YXY_20200723_HF_HILIC_2ul_1	File25305 Spectrum12853 scans: 18016
P02790	TPLPPTSAHGNVAEGETKPDPDVTER		2778.000	3079.45	3	1027.49	2714.31	0.00301846	0.980196	1.511e-10	125	0.00278	0.00146	365.1322	Hex(1)HexNAc(1)	P02790_TPLPPTSAHGNVAEGETKPDPDVTER_Hex(1)HexNAc(1)	YXY_20200723_HF_HILIC_2ul_1	File25305 Spectrum7253 scans: 12136
P01042	IASFSQNCDIYPGKDFVQPPTKICVGCPR	Q6(Deamidated);C8(Carbamidomethyl);C24(Carbamidomethyl);C27(Carbamidomethyl)	4546.000	4011.85	4	1003.97	3354.58	0.0392866	9.79262	1.3961e-11	125	0.001256	0.00146	656.2276	Hex(1)HexNAc(1)Neu5Ac(1)	P01042_IASFSQNCDIYPGKDFVQPPTKICVGCPR_Hex(1)HexNAc(1)Neu5Ac(1)	YXY_20200723_HF_HILIC_2ul_1	File25305 Spectrum17114 scans: 22491
Q14515	EHANSKQEEDNTQSDDILEESDQPTQVSK		3066.000	4248.8	4	1063.21	3300.45	0.0220298	5.18494	1.4018e-08	125	0.01178	0.00146	947.3230	Hex(1)HexNAc(1)Neu5Ac(2)	Q14515_EHANSKQEEDNTQSDDILEESDQPTQVSK_Hex(1)HexNAc(1)Neu5Ac(2)	YXY_20200723_HF_HILIC_2ul_1	File25305 Spectrum8922 scans: 13888
P02671	HRHPDEAAFFDTASTGK		3085.000	2833.2	3	945.406	1885.87	0.00274664	0.969449	3.7297e-12	125	0.0005883	0.00146	947.3230	Hex(1)HexNAc(1)Neu5Ac(2)	P02671_HRHPDEAAFFDTASTGK_Hex(1)HexNAc(1)Neu5Ac(2)	YXY_20200723_HF_HILIC_2ul_1	File25305 Spectrum9024 scans: 13995
P19827	VLSALQPSPTHSSSNTQR	N15(Deamidated)	2797.000	2275.1	3	759.373	1909.95	0.0165024	7.25347	7.2407e-09	125	0.002097	0.00146	365.1322	Hex(1)HexNAc(1)	P19827_VLSALQPSPTHSSSNTQR_Hex(1)HexNAc(1)	YXY_20200723_HF_HILIC_2ul_1	File25305 Spectrum7366 scans: 12254
P05155	NPNATSSSSQDPESLQDR	N3(Deamidated)	2854.000	2880.16	3	961.059	1932.83	0.00306394	1.06381	2.6312e-09	125	0.002001	0.00146	947.3230	Hex(1)HexNAc(1)Neu5Ac(2)	P05155_NPNATSSSSQDPESLQDR_Hex(1)HexNAc(1)Neu5Ac(2)	YXY_20200723_HF_HILIC_2ul_1	File25305 Spectrum7699 scans: 12604
P19827	RTFVLSALQPSPTHSSSNTQR		3476.000	2678.32	4	670.588	2313.18	0.00693804	2.59044	8.3433e-08	125	0.005742	0.00146	365.1322	Hex(1)HexNAc(1)	P19827_RTFVLSALQPSPTHSSSNTQR_Hex(1)HexNAc(1)	YXY_20200723_HF_HILIC_2ul_1	File25305 Spectrum11198 scans: 16278
P02790	TPLPPTSAHGNVAEGETKPDPDVTER		2826.000	3079.45	4	770.871	2714.31	0.006742	2.18935	3.3797e-08	125	0.01724	0.00146	365.1322	Hex(1)HexNAc(1)	P02790_TPLPPTSAHGNVAEGETKPDPDVTER_Hex(1)HexNAc(1)	YXY_20200723_HF_HILIC_2ul_1	File25305 Spectrum7536 scans: 12433
P04004	GDVFTMPEDEYTVYDDGEEKNNATVHEQVGGPSLTSDLQAQSK	M6(Oxidation);N21(Deamidated);Q28(Deamidated)	4482.000	4922.1	4	1231.53	4718.06	-0.0403401	-8.19571	1.9409e-08	125	0.01647	0.00146	203.0794	HexNAc(1)	P04004_GDVFTMPEDEYTVYDDGEEKNNATVHEQVGGPSLTSDLQAQSK_HexNAc(1)	YXY_20200723_HF_HILIC_2ul_1	File25305 Spectrum16768 scans: 22128
P02671	KMADEAGSEADHEGTHSTK	M2(Oxidation)	1638.000	2509.98	4	628.501	2015.85	-0.0469678	-18.7124	1.5911e-08	124	0.06954	0.00146	494.1748	HexNAc(1)Neu5Ac(1)	P02671_KMADEAGSEADHEGTHSTK_HexNAc(1)Neu5Ac(1)	YXY_20200723_HF_HILIC_2ul_1	File25305 Spectrum780 scans: 5334
O75882	CVNGGRCNPGTGQCVCPAGWVGEQCQHCGGR	C1(Carbamidomethyl);C7(Carbamidomethyl);C14(Carbamidomethyl);C16(Carbamidomethyl);C25(Carbamidomethyl);C28(Carbamidomethyl)	3258.000	4130.67	4	1033.67	3474.41	0.0317409	7.68421	5.0108e-10	124	0.001262	0.00146	656.2276	Hex(1)HexNAc(1)Neu5Ac(1)	O75882_CVNGGRCNPGTGQCVCPAGWVGEQCQHCGGR_Hex(1)HexNAc(1)Neu5Ac(1)	YXY_20200723_HF_HILIC_2ul_1	File25305 Spectrum9994 scans: 15014
P02671	HRHPDEAAFFDTASTGK		3032.000	2542.1	4	636.532	1885.87	0.000170173	0.0669418	8.8032e-08	123	0.01007	0.00146	656.2276	Hex(1)HexNAc(1)Neu5Ac(1)	P02671_HRHPDEAAFFDTASTGK_Hex(1)HexNAc(1)Neu5Ac(1)	YXY_20200723_HF_HILIC_2ul_1	File25305 Spectrum8731 scans: 13688
P02671	HRHPDEAAFFDTASTGK		3080.000	2542.1	4	636.532	1885.87	-0.000229827	-0.0904086	9.3226e-10	123	0.01223	0.00146	656.2276	Hex(1)HexNAc(1)Neu5Ac(1)	P02671_HRHPDEAAFFDTASTGK_Hex(1)HexNAc(1)Neu5Ac(1)	YXY_20200723_HF_HILIC_2ul_1	File25305 Spectrum8999 scans: 13969
[truncated: 4,434 more rows]

## Sheet: Table S3A
Table S3A. Intact glycopeptides identified from 1.0 μL human serum in the loading buffer of 50%ACN/2%TFA method.
[truncated: 1,809 more rows]

[truncated: 12 more sheets: Table S3B, Table S3C, Table S4A, Table S4B, Table S5A, Table S5B, Table S5C, Table S6A, Table S6B, Table S7A, Table S7B, Table S7C]
